# Supplementary material
Source: MDPI journal article supplement (https://www.mdpi.com/2304-6740/3/4/448)

# checkCIF/PLATON report

You have not supplied any structure factors. As a result the full set of tests cannot be run.

THIS REPORT IS FOR GUIDANCE ONLY. IF USED AS PART OF A REVIEW PROCEDURE FOR PUBLICATION, IT SHOULD NOT REPLACE THE EXPERTISE OF AN EXPERIENCED CRYSTALLOGRAPHIC REFEREE.

No syntax errors found.      CIF dictionary      Interpreting this report

## Datablock: el643b

---

Bond precision:    C-C = 0.0054 Å                      Wavelength=1.54184

Cell:                      a=14.6954(4)              b=14.3307(6)              c=18.2161(4)  
                            alpha=90                      beta=90                      gamma=90  
Temperature:              173 K

|                | Calculated                               | Reported                                |
|----------------|------------------------------------------|-----------------------------------------|
| Volume         | 3836.2(2)                                | 3836.2(2)                               |
| Space group    | P b c a                                  | P b c a                                 |
| Hall group     | -P 2ac 2ab                               | -P 2ac 2ab                              |
| Moiety formula | C14.63 H14.27 N4 O7 Y,<br>0.683(C2 H6 O) | C14.63 H14.27 N4 O7 Y,<br>0.68(C2 H6 O) |
| Sum formula    | C16 H18.37 N4 O7.68 Y                    | C16 H18.37 N4 O7.68 Y                   |
| Mr             | 478.55                                   | 478.56                                  |
| Dx,g cm-3      | 1.657                                    | 1.657                                   |
| Z              | 8                                        | 8                                       |
| Mu (mm-1)      | 4.750                                    | 4.750                                   |
| F000           | 1942.6                                   | 1943.0                                  |
| F000'          | 1946.42                                  |                                         |
| h,k,lmax       | 18,17,22                                 | 17,17,22                                |
| Nref           | 3746                                     | 3721                                    |
| Tmin,Tmax      | 0.653,0.867                              | 0.778,1.000                             |
| Tmin'          | 0.592                                    |                                         |

Correction method= # Reported T Limits: Tmin=0.778 Tmax=1.000  
AbsCorr = MULTI-SCAN

Data completeness= 0.993                      Theta(max)= 71.620

R(reflections)= 0.0447( 2838)              wR2(reflections)= 0.1183( 3721)

S = 1.054                      Npar= 287

---

The following ALERTS were generated. Each ALERT has the format

**test-name\_ALERT\_alert-type\_alert-level.**

Click on the hyperlinks for more details of the test.

---

**Alert level B**

|                   |                                                     |              |
|-------------------|-----------------------------------------------------|--------------|
| PLAT201_ALERT_2_B | Isotropic non-H Atoms in Main Residue(s) .....      | 1 Report     |
| PLAT415_ALERT_2_B | Short Inter D-H..H-X           H00B_A .. H00L ..    | 2.06 Ang.    |
| PLAT420_ALERT_2_B | D-H Without Acceptor           >O005_A - >H00B_A .. | Please Check |

---

**Alert level C**

|                   |                                                       |            |
|-------------------|-------------------------------------------------------|------------|
| PLAT241_ALERT_2_C | High           Ueq as Compared to Neighbors for ..... | 0009 Check |
| PLAT241_ALERT_2_C | High           Ueq as Compared to Neighbors for ..... | 000A Check |

---

**Alert level G**

FORMU01\_ALERT\_1\_G There is a discrepancy between the atom counts in the  
\_chemical\_formula\_sum and \_chemical\_formula\_moiety. This is  
usually due to the moiety formula being in the wrong format.  
Atom count from \_chemical\_formula\_sum: C16 H18.37 N4 O7.68 Y1  
Atom count from \_chemical\_formula\_moiety:C15.99 H18.35 N4 O7.68 Y1

CELLZ01\_ALERT\_1\_G Difference between formula and atom\_site contents detected.  
CELLZ01\_ALERT\_1\_G ALERT: check formula stoichiometry or atom site occupancies.

From the CIF: \_cell\_formula\_units\_Z 8

From the CIF: \_chemical\_formula\_sum C16 H18.37 N4 O7.68 Y

TEST: Compare cell contents of formula and atom\_site data

| atom | Z*formula | cif sites | diff  |
|------|-----------|-----------|-------|
| C    | 128.00    | 128.00    | 0.00  |
| H    | 146.96    | 146.93    | 0.03  |
| N    | 32.00     | 32.00     | 0.00  |
| O    | 61.44     | 61.47     | -0.03 |
| Y    | 8.00      | 8.00      | 0.00  |

|                   |                                                  |              |
|-------------------|--------------------------------------------------|--------------|
| PLAT002_ALERT_2_G | Number of Distance or Angle Restraints on AtSite | 9 Note       |
| PLAT003_ALERT_2_G | Number of Uiso or Uij Restrained non-H Atoms ... | 6 Report     |
| PLAT004_ALERT_5_G | Polymeric Structure Found with Maximum Dimension | 2 Info       |
| PLAT005_ALERT_5_G | No _iucr_refine_instructions_details in the CIF  | Please Do !  |
| PLAT007_ALERT_5_G | Number of Unrefined Donor-H Atoms .....          | 3 Report     |
| PLAT042_ALERT_1_G | Calc. and Reported MoietyFormula Strings Differ  | Please Check |
| PLAT068_ALERT_1_G | Reported F000 Differs from Calcd (or Missing)... | Please Check |
| PLAT232_ALERT_2_G | Hirshfeld Test Diff (M-X) Y001 -- O00A ..        | 14.4 su      |
| PLAT300_ALERT_4_G | Atom Site Occupancy of >O005_A is Constrained at | 0.683 Check  |
| PLAT300_ALERT_4_G | Atom Site Occupancy of <O0_B is Constrained at   | 0.317 Check  |
| PLAT300_ALERT_4_G | Atom Site Occupancy of <C1A_B is Constrained at  | 0.317 Check  |
| PLAT300_ALERT_4_G | Atom Site Occupancy of <C0AA_B is Constrained at | 0.317 Check  |
| PLAT300_ALERT_4_G | Atom Site Occupancy of >H00A_A is Constrained at | 0.683 Check  |
| PLAT300_ALERT_4_G | Atom Site Occupancy of >H00B_A is Constrained at | 0.683 Check  |
| PLAT300_ALERT_4_G | Atom Site Occupancy of <H1AA_B is Constrained at | 0.317 Check  |
| PLAT300_ALERT_4_G | Atom Site Occupancy of <H1AB_B is Constrained at | 0.317 Check  |
| PLAT300_ALERT_4_G | Atom Site Occupancy of <H0AA_B is Constrained at | 0.317 Check  |
| PLAT300_ALERT_4_G | Atom Site Occupancy of <H0AB_B is Constrained at | 0.317 Check  |
| PLAT300_ALERT_4_G | Atom Site Occupancy of <H0AC_B is Constrained at | 0.317 Check  |
| PLAT300_ALERT_4_G | Atom Site Occupancy of <H0_B is Constrained at   | 0.317 Check  |
| PLAT300_ALERT_4_G | Atom Site Occupancy of >O1_A is Constrained at   | 0.683 Check  |
| PLAT300_ALERT_4_G | Atom Site Occupancy of >C1_A is Constrained at   | 0.683 Check  |
| PLAT300_ALERT_4_G | Atom Site Occupancy of >C2_A is Constrained at   | 0.683 Check  |
| PLAT300_ALERT_4_G | Atom Site Occupancy of >H1_A is Constrained at   | 0.683 Check  |
| PLAT300_ALERT_4_G | Atom Site Occupancy of >H1A_A is Constrained at  | 0.683 Check  |
| PLAT300_ALERT_4_G | Atom Site Occupancy of >H1B_A is Constrained at  | 0.683 Check  |
| PLAT300_ALERT_4_G | Atom Site Occupancy of >H2A_A is Constrained at  | 0.683 Check  |

|                                                                    |       |       |
|--------------------------------------------------------------------|-------|-------|
| PLAT300_ALERT_4_G Atom Site Occupancy of >H2B_A is Constrained at  | 0.683 | Check |
| PLAT300_ALERT_4_G Atom Site Occupancy of >H2C_A is Constrained at  | 0.683 | Check |
| PLAT301_ALERT_3_G Main Residue Disorder ..... Percentage =         | 6     | Note  |
| PLAT302_ALERT_4_G Anion/Solvent Disorder ..... Percentage =        | 100   | Note  |
| PLAT720_ALERT_4_G Number of Unusual/Non-Standard Labels .....      | 57    | Note  |
| PLAT764_ALERT_4_G Overcomplete CIF Bond List Detected (Rep/Expd) . | 1.13  | Ratio |
| PLAT860_ALERT_3_G Number of Least-Squares Restraints .....         | 32    | Note  |

---

0 **ALERT level A** = Most likely a serious problem - resolve or explain  
 3 **ALERT level B** = A potentially serious problem, consider carefully  
 2 **ALERT level C** = Check. Ensure it is not caused by an omission or oversight  
 37 **ALERT level G** = General information/check it is not something unexpected

5 ALERT type 1 CIF construction/syntax error, inconsistent or missing data  
 8 ALERT type 2 Indicator that the structure model may be wrong or deficient  
 2 ALERT type 3 Indicator that the structure quality may be low  
 24 ALERT type 4 Improvement, methodology, query or suggestion  
 3 ALERT type 5 Informative message, check

---

## Datablock: el508b

---

Bond precision: C-C = 0.0093 A

Wavelength=0.71073

Cell: a=14.2871(3) b=19.9839(6) c=20.0637(7)  
 alpha=90 beta=101.857(3) gamma=90

Temperature: 173 K

|                | Calculated                | Reported                  |
|----------------|---------------------------|---------------------------|
| Volume         | 5606.2(3)                 | 5606.2(3)                 |
| Space group    | P 21/n                    | P 1 21/n 1                |
| Hall group     | -P 2yn                    | -P 2yn                    |
| Moiety formula | C42 H36 Cl2 Dy2 N9 O9, Cl | C42 H36 Cl2 Dy2 N9 O9, Cl |
| Sum formula    | C42 H36 Cl3 Dy2 N9 O9     | C42 H36 Cl3 Dy2 N9 O9     |
| Mr             | 1242.15                   | 1242.15                   |
| Dx,g cm-3      | 1.472                     | 1.472                     |
| Z              | 4                         | 4                         |
| Mu (mm-1)      | 2.840                     | 2.840                     |
| F000           | 2424.0                    | 2424.0                    |
| F000'          | 2425.11                   |                           |
| h,k,lmax       | 17,24,25                  | 19,27,26                  |
| Nref           | 11460                     | 11177                     |
| Tmin,Tmax      | 0.718,0.797               | 0.674,1.000               |
| Tmin'          | 0.647                     |                           |

Correction method= # Reported T Limits: Tmin=0.674 Tmax=1.000  
 AbsCorr = MULTI-SCAN

Data completeness= 0.975

Theta(max)= 26.371

R(reflections)= 0.0452( 9122)      wR2(reflections)= 0.1221( 11177)

S = 1.077      Npar= 589

---

The following ALERTS were generated. Each ALERT has the format

**test-name\_ALERT\_alert-type\_alert-level.**

Click on the hyperlinks for more details of the test.

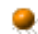

#### Alert level B

|                            |                                        |     |        |
|----------------------------|----------------------------------------|-----|--------|
| PLAT213_ALERT_2_B Atom C27 | has ADP max/min Ratio .....            | 4.3 | prolat |
| PLAT213_ALERT_2_B Atom C40 | has ADP max/min Ratio .....            | 4.8 | prolat |
| PLAT241_ALERT_2_B High     | Ueq as Compared to Neighbors for ..... | C27 | Check  |
| PLAT241_ALERT_2_B High     | Ueq as Compared to Neighbors for ..... | C40 | Check  |

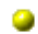

#### Alert level C

|                                                                 |        |       |
|-----------------------------------------------------------------|--------|-------|
| PLAT029_ALERT_3_C _diffn_measured_fraction_theta_full Low ..... | 0.976  | Note  |
| PLAT220_ALERT_2_C Large Non-Solvent C Ueq(max)/Ueq(min) Range   | 5.9    | Ratio |
| PLAT222_ALERT_3_C Large Non-Solvent H Uiso(max)/Uiso(min) ...   | 5.5    | Ratio |
| PLAT234_ALERT_4_C Large Hirshfeld Difference C38 -- C39 ..      | 0.16   | Ang.  |
| PLAT242_ALERT_2_C Low Ueq as Compared to Neighbors for .....    | Dy1    | Check |
| PLAT242_ALERT_2_C Low Ueq as Compared to Neighbors for .....    | Dy2    | Check |
| PLAT242_ALERT_2_C Low Ueq as Compared to Neighbors for .....    | N6     | Check |
| PLAT242_ALERT_2_C Low Ueq as Compared to Neighbors for .....    | N9     | Check |
| PLAT242_ALERT_2_C Low Ueq as Compared to Neighbors for .....    | C38    | Check |
| PLAT342_ALERT_3_C Low Bond Precision on C-C Bonds .....         | 0.0093 | Ang.  |
| PLAT420_ALERT_2_C D-H Without Acceptor N2 - H2 ..               | Please | Check |
| PLAT420_ALERT_2_C D-H Without Acceptor N5 - H5 ..               | Please | Check |
| PLAT420_ALERT_2_C D-H Without Acceptor N8 - H8 ..               | Please | Check |

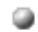

#### Alert level G

|                                                                      |      |        |
|----------------------------------------------------------------------|------|--------|
| PLAT004_ALERT_5_G Polymeric Structure Found with Maximum Dimension   | 1    | Info   |
| PLAT007_ALERT_5_G Number of Unrefined Donor-H Atoms .....            | 3    | Report |
| PLAT083_ALERT_2_G SHELXL Second Parameter in WGHT Unusually Large.   | 6.80 | Why ?  |
| PLAT232_ALERT_2_G Hirshfeld Test Diff (M-X) Dy1 -- Cl2 ..            | 25.0 | su     |
| PLAT232_ALERT_2_G Hirshfeld Test Diff (M-X) Dy2 -- Cl1 ..            | 33.7 | su     |
| PLAT606_ALERT_4_G VERY LARGE Solvent Accessible VOID(S) in Structure | !    | Info   |
| PLAT868_ALERT_4_G ALERTS Due to the use of _smtbx_masks Suppressed   | !    | Info   |
| PLAT950_ALERT_5_G Calculated (ThMax) and CIF-Reported Hmax Differ    | -2   | Units  |
| PLAT951_ALERT_5_G Calculated (ThMax) and CIF-Reported Kmax Differ    | -3   | Units  |

---

0 **ALERT level A** = Most likely a serious problem - resolve or explain  
4 **ALERT level B** = A potentially serious problem, consider carefully  
13 **ALERT level C** = Check. Ensure it is not caused by an omission or oversight  
9 **ALERT level G** = General information/check it is not something unexpected

0 ALERT type 1 CIF construction/syntax error, inconsistent or missing data  
16 ALERT type 2 Indicator that the structure model may be wrong or deficient  
3 ALERT type 3 Indicator that the structure quality may be low  
3 ALERT type 4 Improvement, methodology, query or suggestion  
4 ALERT type 5 Informative message, check

---

**Datablock: el529**

---

Bond precision: C-C = 0.0184 Å

Wavelength=0.71073

Cell: a=14.218(3) b=20.386(4) c=20.455(4)  
alpha=90 beta=101.982(16) gamma=90  
Temperature: 173 K

|                        | Calculated                | Reported                  |
|------------------------|---------------------------|---------------------------|
| Volume                 | 5800(2)                   | 5799.5(18)                |
| Space group            | P 21/n                    | P 1 21/n 1                |
| Hall group             | -P 2yn                    | -P 2yn                    |
| Moiety formula         | C42 H35 Cl2 Gd2 N9 O9, Cl | C42 H35 Cl2 Gd2 N9 O9, Cl |
| Sum formula            | C42 H35 Cl3 Gd2 N9 O9     | C42 H35 Cl3 Gd2 N9 O9     |
| Mr                     | 1230.64                   | 1230.64                   |
| Dx, g cm <sup>-3</sup> | 1.409                     | 1.409                     |
| Z                      | 4                         | 4                         |
| Mu (mm <sup>-1</sup> ) | 2.456                     | 2.456                     |
| F000                   | 2404.0                    | 2404.0                    |
| F000'                  | 2405.24                   |                           |
| h,k,lmax               | 16,24,24                  | 16,28,25                  |
| Nref                   | 10231                     | 7486                      |
| Tmin,Tmax              | 0.745,0.822               | 0.487,1.000               |
| Tmin'                  | 0.659                     |                           |

Correction method= # Reported T Limits: Tmin=0.487 Tmax=1.000  
AbsCorr = MULTI-SCAN

Data completeness= 0.732

Theta(max)= 24.999

R(reflections)= 0.0608( 4625)

wR2(reflections)= 0.1576( 7486)

S = 0.937

Npar= 589

---

The following ALERTS were generated. Each ALERT has the format  
**test-name\_ALERT\_alert-type\_alert-level.**  
Click on the hyperlinks for more details of the test.

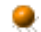

#### Alert level B

PLAT018\_ALERT\_1\_B \_diffrn\_measured\_fraction\_theta\_max .NE. \_full ! Check  
PLAT241\_ALERT\_2\_B High Ueq as Compared to Neighbors for ..... C33 Check

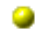

#### Alert level C

SHFSU01\_ALERT\_2\_C The absolute value of parameter shift to su ratio > 0.05  
Absolute value of the parameter shift to su ratio given 0.098  
Additional refinement cycles may be required.  
PLAT080\_ALERT\_2\_C Maximum Shift/Error ..... 0.10 Why ?  
PLAT213\_ALERT\_2\_C Atom C35 has ADP max/min Ratio ..... 3.3 prolat  
PLAT220\_ALERT\_2\_C Large Non-Solvent C Ueq(max)/Ueq(min) Range 4.1 Ratio  
PLAT230\_ALERT\_2\_C Hirshfeld Test Diff for C35 -- C36 .. 5.4 su  
PLAT234\_ALERT\_4\_C Large Hirshfeld Difference N1 -- C7 .. 0.21 Ang.

|                   |                                       |       |     |    |        |              |
|-------------------|---------------------------------------|-------|-----|----|--------|--------------|
| PLAT234_ALERT_4_C | Large Hirshfeld Difference N2         | --    | C6  | .. | 0.19   | Ang.         |
| PLAT234_ALERT_4_C | Large Hirshfeld Difference N7         | --    | N8  | .. | 0.16   | Ang.         |
| PLAT234_ALERT_4_C | Large Hirshfeld Difference C7         | --    | C8  | .. | 0.23   | Ang.         |
| PLAT234_ALERT_4_C | Large Hirshfeld Difference C29        | --    | C30 | .. | 0.19   | Ang.         |
| PLAT241_ALERT_2_C | High Ueq as Compared to Neighbors for | ..... |     |    | C5     | Check        |
| PLAT242_ALERT_2_C | Low Ueq as Compared to Neighbors for  | ..... |     |    | Gd1    | Check        |
| PLAT242_ALERT_2_C | Low Ueq as Compared to Neighbors for  | ..... |     |    | Gd2    | Check        |
| PLAT242_ALERT_2_C | Low Ueq as Compared to Neighbors for  | ..... |     |    | N9     | Check        |
| PLAT342_ALERT_3_C | Low Bond Precision on C-C Bonds       | ..... |     |    | 0.0184 | Ang.         |
| PLAT420_ALERT_2_C | D-H Without Acceptor N2               | -     | H2  | .. |        | Please Check |
| PLAT420_ALERT_2_C | D-H Without Acceptor N5               | -     | H5  | .. |        | Please Check |
| PLAT420_ALERT_2_C | D-H Without Acceptor N8               | -     | H8  | .. |        | Please Check |

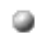

### Alert level G

|                   |                                                    |       |     |    |      |        |
|-------------------|----------------------------------------------------|-------|-----|----|------|--------|
| PLAT003_ALERT_2_G | Number of Uiso or Uij Restrained non-H Atoms       | ...   |     |    | 6    | Report |
| PLAT004_ALERT_5_G | Polymeric Structure Found with Maximum Dimension   |       |     |    | 1    | Info   |
| PLAT007_ALERT_5_G | Number of Unrefined Donor-H Atoms                  | ..... |     |    | 3    | Report |
| PLAT152_ALERT_1_G | The Supplied and Calc. Volume s.u. Differ by       | ...   |     |    | 2    | Units  |
| PLAT232_ALERT_2_G | Hirshfeld Test Diff (M-X) Gd1                      | --    | C11 | .. | 11.5 | su     |
| PLAT232_ALERT_2_G | Hirshfeld Test Diff (M-X) Gd2                      | --    | C12 | .. | 19.1 | su     |
| PLAT343_ALERT_2_G | Unusual sp? Angle Range in Main Residue for        |       |     |    | C1   | Check  |
| PLAT606_ALERT_4_G | VERY LARGE Solvent Accessible VOID(S) in Structure |       |     |    | !    | Info   |
| PLAT860_ALERT_3_G | Number of Least-Squares Restraints                 | ..... |     |    | 39   | Note   |
| PLAT868_ALERT_4_G | ALERTS Due to the use of _smtbx_masks Suppressed   |       |     |    | !    | Info   |
| PLAT951_ALERT_5_G | Calculated (ThMax) and CIF-Reported Kmax Differ    |       |     |    | -4   | Units  |

- 
- 0 **ALERT level A** = Most likely a serious problem - resolve or explain  
 2 **ALERT level B** = A potentially serious problem, consider carefully  
 18 **ALERT level C** = Check. Ensure it is not caused by an omission or oversight  
 11 **ALERT level G** = General information/check it is not something unexpected
- 2 ALERT type 1 CIF construction/syntax error, inconsistent or missing data  
 17 ALERT type 2 Indicator that the structure model may be wrong or deficient  
 2 ALERT type 3 Indicator that the structure quality may be low  
 7 ALERT type 4 Improvement, methodology, query or suggestion  
 3 ALERT type 5 Informative message, check
- 

## Datablock: el486c

Bond precision: C-C = 0.0069 A

Wavelength=1.54184

Cell: a=10.3419(3) b=14.5850(5) c=15.7309(5)  
 alpha=95.672(3) beta=95.377(2) gamma=109.768(3)  
 Temperature: 173 K

|                | Calculated        | Reported          |
|----------------|-------------------|-------------------|
| Volume         | 2201.46(13)       | 2201.47(13)       |
| Space group    | P -1              | P -1              |
| Hall group     | -P 1              | -P 1              |
| Moiety formula | C16 H20 Dy N5 O11 | C16 H20 Dy N5 O11 |
| Sum formula    | C16 H20 Dy N5 O11 | C16 H20 Dy N5 O11 |
| Mr             | 620.87            | 620.87            |
| Dx,g cm-3      | 1.873             | 1.873             |
| Z              | 4                 | 4                 |
| Mu (mm-1)      | 18.780            | 18.780            |
| F000           | 1220.0            | 1220.0            |
| F000'          | 1185.15           |                   |
| h,k,lmax       | 11,16,17          | 11,16,17          |
| Nref           | 6760              | 6718              |
| Tmin,Tmax      | 0.206,0.472       | 0.782,1.000       |
| Tmin'          | 0.084             |                   |

Correction method= # Reported T Limits: Tmin=0.782 Tmax=1.000  
AbsCorr = MULTI-SCAN

Data completeness= 0.994                      Theta(max)= 61.091

R(reflections)= 0.0310( 5861)              wR2(reflections)= 0.0793( 6718)

S = 1.049                                      Npar= 614

The following ALERTS were generated. Each ALERT has the format

**test-name\_ALERT\_alert-type\_alert-level.**

Click on the hyperlinks for more details of the test.

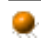

#### Alert level B

THETM01\_ALERT\_3\_B The value of sine(theta\_max)/wavelength is less than 0.575  
Calculated sin(theta\_max)/wavelength = 0.5678

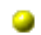

#### Alert level C

PLAT241\_ALERT\_2\_C High              Ueq as Compared to Neighbors for .....              017 Check  
PLAT430\_ALERT\_2\_C Short Inter D...A Contact    022      ..    022      ..              2.90 Ang.

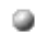

#### Alert level G

PLAT002\_ALERT\_2\_G Number of Distance or Angle Restraints on AtSite              14 Note  
PLAT007\_ALERT\_5\_G Number of Unrefined Donor-H Atoms .....              2 Report  
PLAT172\_ALERT\_4\_G The CIF-Embedded .res File Contains DFIX Records              4 Report  
PLAT173\_ALERT\_4\_G The CIF-Embedded .res File Contains DANG Records              8 Report  
PLAT232\_ALERT\_2\_G Hirshfeld Test Diff (M-X)    Dy1      --    09      ..              6.3 su  
PLAT232\_ALERT\_2\_G Hirshfeld Test Diff (M-X)    Dy1      --    012      ..              5.2 su  
PLAT860\_ALERT\_3\_G Number of Least-Squares Restraints .....              12 Note

0 **ALERT level A** = Most likely a serious problem - resolve or explain

1 **ALERT level B** = A potentially serious problem, consider carefully

2 **ALERT level C** = Check. Ensure it is not caused by an omission or oversight  
7 **ALERT level G** = General information/check it is not something unexpected

0 ALERT type 1 CIF construction/syntax error, inconsistent or missing data  
5 ALERT type 2 Indicator that the structure model may be wrong or deficient  
2 ALERT type 3 Indicator that the structure quality may be low  
2 ALERT type 4 Improvement, methodology, query or suggestion  
1 ALERT type 5 Informative message, check

---

## Datablock: 2015ncs0277

---

Bond precision: C-C = 0.0050 A Wavelength=0.71075

Cell: a=12.2901(9) b=15.4666(11) c=18.7780(13)  
alpha=90 beta=100.085(6) gamma=90

Temperature: 100 K

|                | Calculated                   | Reported                     |
|----------------|------------------------------|------------------------------|
| Volume         | 3514.3(4)                    | 3514.3(4)                    |
| Space group    | P 21/c                       | P 1 21/c 1                   |
| Hall group     | -P 2ybc                      | -P 2ybc                      |
| Moiety formula | C30 H32 N6 O8 Y, C2 H3 N, Cl | C30 H32 N6 O8 Y, Cl, C2 H3 N |
| Sum formula    | C32 H35 Cl N7 O8 Y           | C32 H35 Cl N7 O8 Y           |
| Mr             | 770.03                       | 770.03                       |
| Dx,g cm-3      | 1.455                        | 1.455                        |
| Z              | 4                            | 4                            |
| Mu (mm-1)      | 1.794                        | 1.794                        |
| F000           | 1584.0                       | 1584.0                       |
| F000'          | 1574.04                      |                              |
| h,k,lmax       | 15,20,24                     | 15,20,24                     |
| Nref           | 8101                         | 7924                         |
| Tmin,Tmax      | 0.851,0.948                  |                              |
| Tmin'          | 0.851                        |                              |

Correction method= Not given

Data completeness= 0.978 Theta(max)= 27.540

R(reflections)= 0.0524( 5547) wR2(reflections)= 0.1338( 7924)

S = 1.007 Npar= 453

---

The following ALERTS were generated. Each ALERT has the format  
**test-name\_ALERT\_alert-type\_alert-level**.  
Click on the hyperlinks for more details of the test.

---

 **Alert level A**



DIFF003\_ALERT\_1\_A \_diffn\_measurement\_device\_type is missing  
Diffractometer make and type. Replaces \_diffn\_measurement\_type.

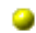

### Alert level C

|                   |                                                  |             |
|-------------------|--------------------------------------------------|-------------|
| PLAT052_ALERT_1_C | Info on Absorption Correction Method Not Given . | Please Do ! |
| PLAT057_ALERT_3_C | Correction for Absorption Required RT(exp) ...   | 1.11 Do !   |
| PLAT244_ALERT_4_C | Low 'Solvent' Ueq as Compared to Neighbors of    | C31 Check   |
| PLAT250_ALERT_2_C | Large U3/U1 Ratio for Average U(i,j) Tensor .... | 2.9 Note    |

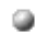

### Alert level G

|                   |                                                  |              |
|-------------------|--------------------------------------------------|--------------|
| PLAT002_ALERT_2_G | Number of Distance or Angle Restraints on AtSite | 7 Note       |
| PLAT007_ALERT_5_G | Number of Unrefined Donor-H Atoms .....          | 2 Report     |
| PLAT042_ALERT_1_G | Calc. and Reported MoietyFormula Strings Differ  | Please Check |
| PLAT172_ALERT_4_G | The CIF-Embedded .res File Contains DFIX Records | 2 Report     |
| PLAT173_ALERT_4_G | The CIF-Embedded .res File Contains DANG Records | 4 Report     |
| PLAT860_ALERT_3_G | Number of Least-Squares Restraints .....         | 6 Note       |

- 
- 1 **ALERT level A** = Most likely a serious problem - resolve or explain  
0 **ALERT level B** = A potentially serious problem, consider carefully  
4 **ALERT level C** = Check. Ensure it is not caused by an omission or oversight  
6 **ALERT level G** = General information/check it is not something unexpected

- 3 ALERT type 1 CIF construction/syntax error, inconsistent or missing data  
2 ALERT type 2 Indicator that the structure model may be wrong or deficient  
2 ALERT type 3 Indicator that the structure quality may be low  
3 ALERT type 4 Improvement, methodology, query or suggestion  
1 ALERT type 5 Informative message, check
- 

It is advisable to attempt to resolve as many as possible of the alerts in all categories. Often the minor alerts point to easily fixed oversights, errors and omissions in your CIF or refinement strategy, so attention to these fine details can be worthwhile. In order to resolve some of the more serious problems it may be necessary to carry out additional measurements or structure refinements. However, the purpose of your study may justify the reported deviations and the more serious of these should normally be commented upon in the discussion or experimental section of a paper or in the "special\_details" fields of the CIF. checkCIF was carefully designed to identify outliers and unusual parameters, but every test has its limitations and alerts that are not important in a particular case may appear. Conversely, the absence of alerts does not guarantee there are no aspects of the results needing attention. It is up to the individual to critically assess their own results and, if necessary, seek expert advice.

### Publication of your CIF in IUCr journals

A basic structural check has been run on your CIF. These basic checks will be run on all CIFs submitted for publication in IUCr journals (*Acta Crystallographica*, *Journal of Applied Crystallography*, *Journal of Synchrotron Radiation*); however, if you intend to submit to *Acta Crystallographica Section C* or *E*, you should make sure that full publication checks are run on the final version of your CIF prior to submission.

### Publication of your CIF in other journals

Please refer to the *Notes for Authors* of the relevant journal for any special instructions relating to CIF submission.

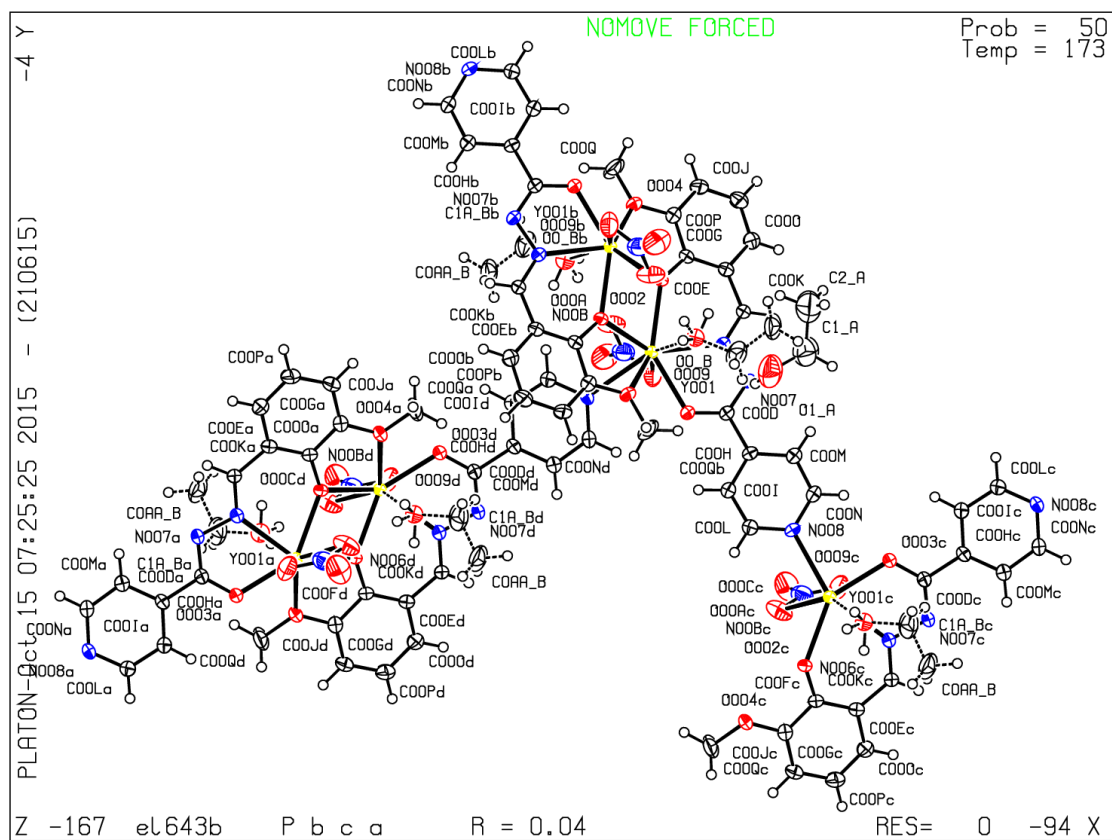

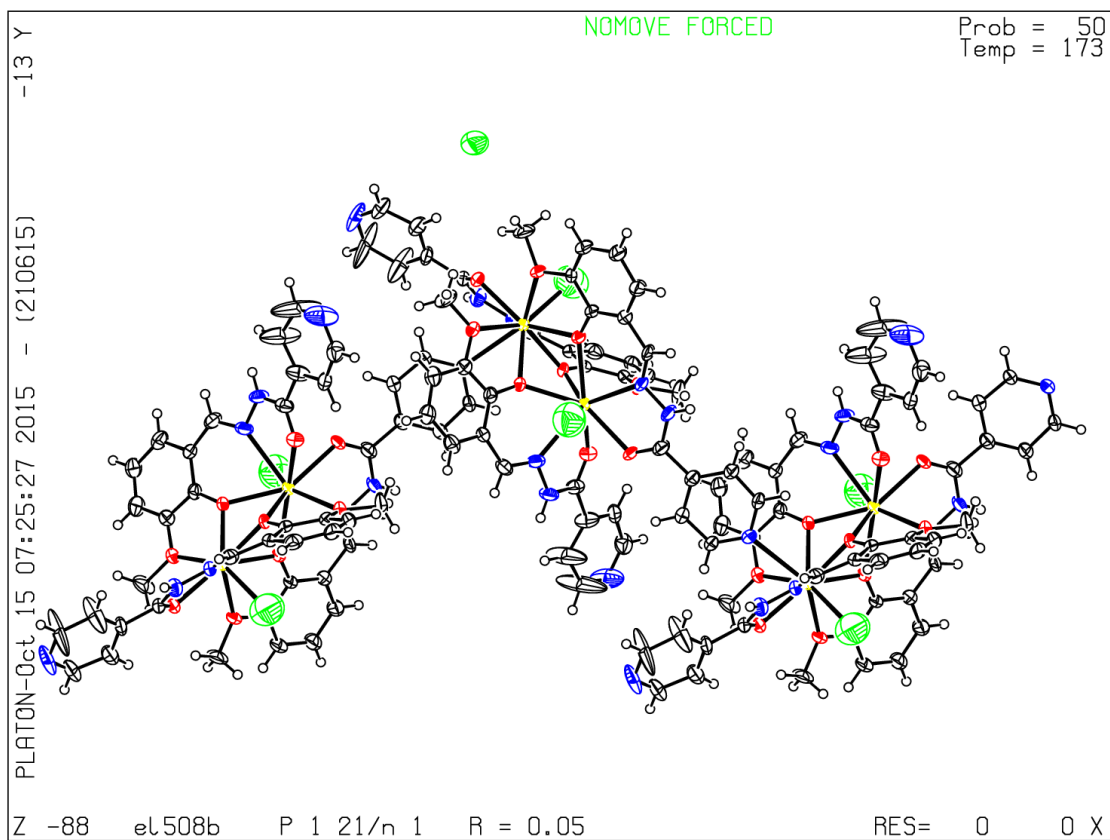

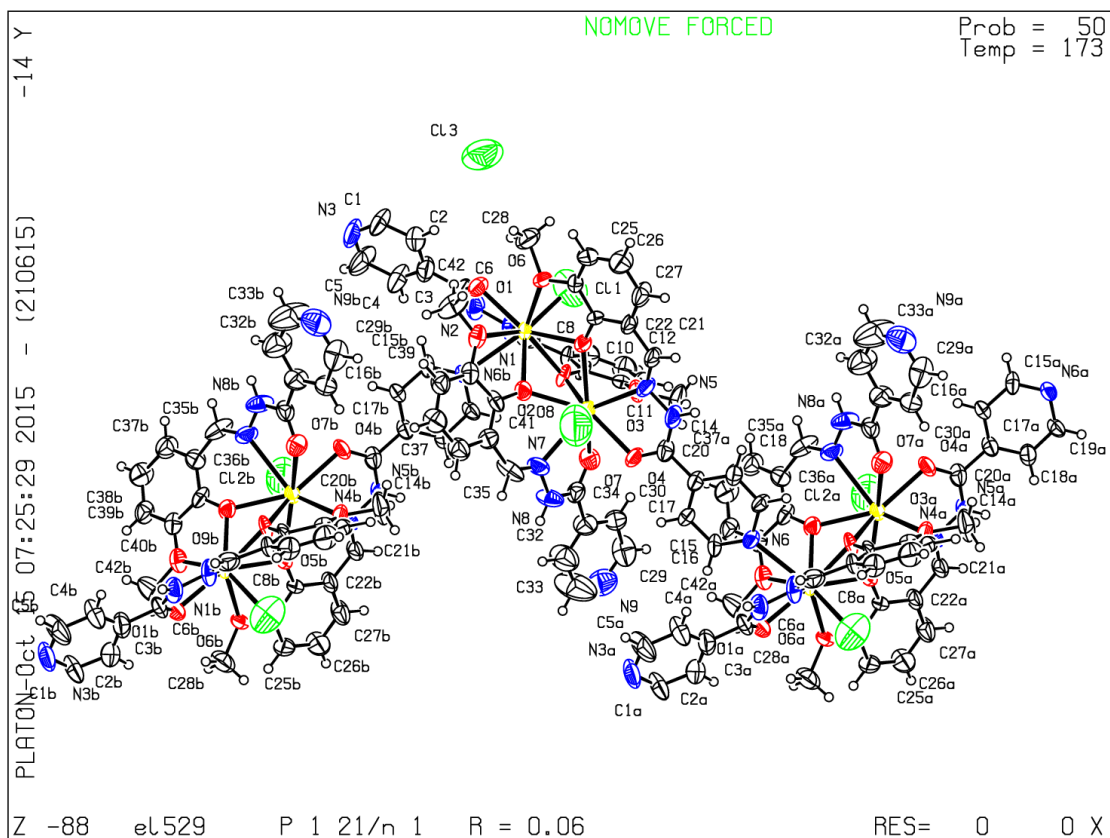

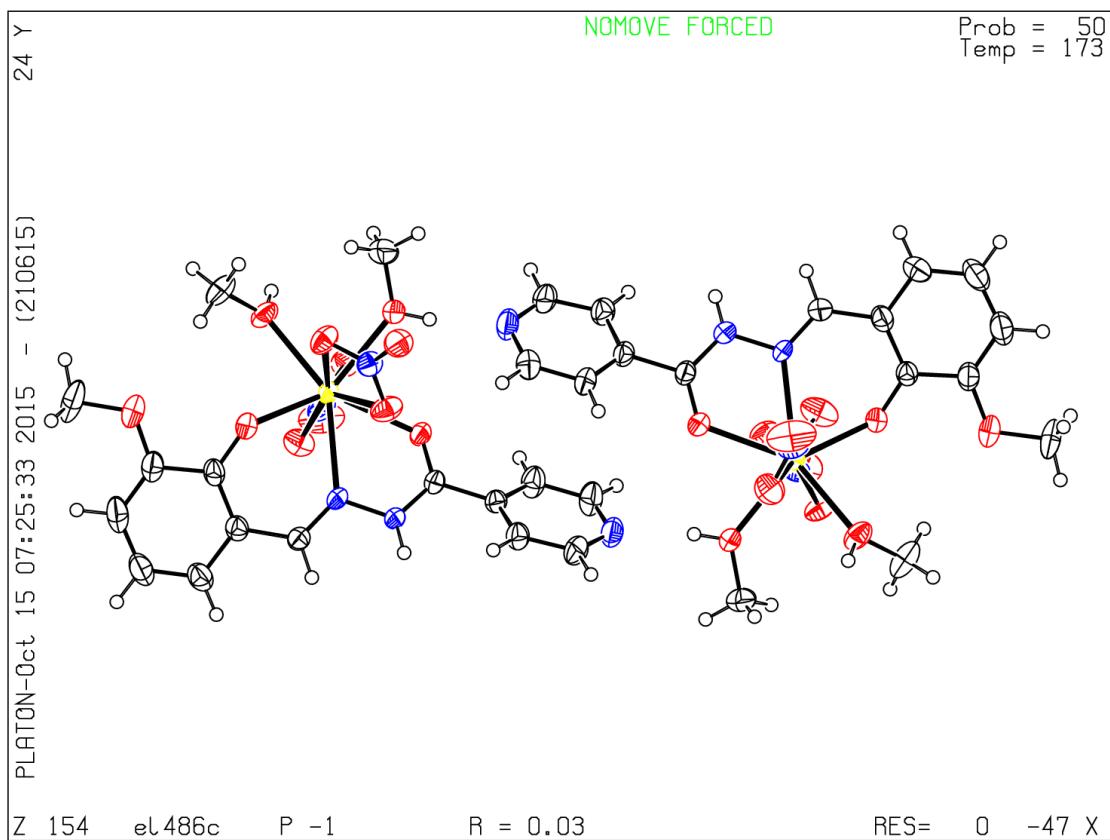

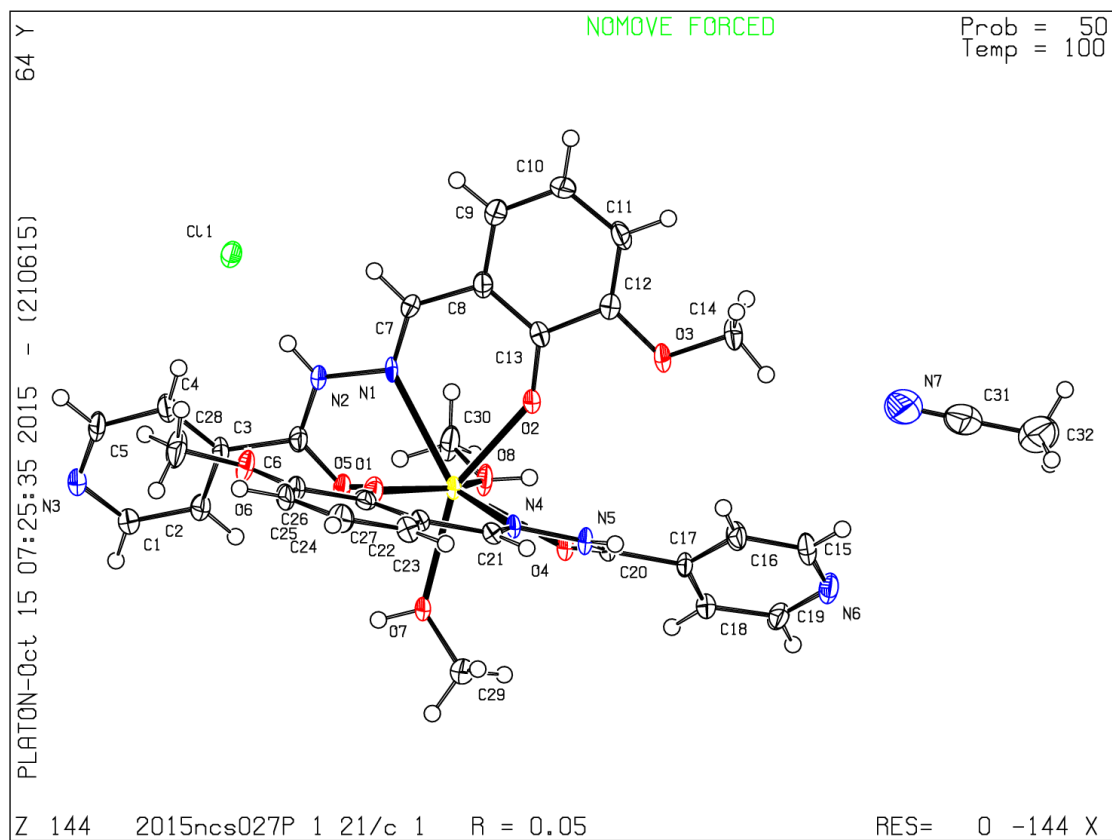

Supplement: s1 [file s1]
