# Supplementary material
Source: MDPI journal article supplement (https://www.mdpi.com/2304-6740/3/4/448)
Supplement: s1 [file s1]

Archive with 4 entries (3 files):
- inorganics-0300448-supplementary/
- inorganics-0300448-supplementary/checkcif.pdf
- inorganics-0300448-supplementary/cifs.cif
- inorganics-0300448-supplementary/inorganics-0300448-supplementary.pdf
