# Supplementary material
Source: MDPI journal article supplement (https://www.mdpi.com/2304-6740/3/4/448)
Supplement: s1 [file s1 › inorganics-0300448-supplementary/cifs.cif]

data_el643b
_audit_creation_date              2015-06-15
_audit_creation_method
;
Olex2 1.2
(compiled 2015.01.26 svn.r3150 for OlexSys, GUI svn.r4998)
;
_shelxl_version_number            2014-1
_publ_contact_author_address      ?
_publ_contact_author_email        ?
_publ_contact_author_name         ''
_publ_contact_author_phone        ?
_publ_section_references
;
Dolomanov, O.V., Bourhis, L.J., Gildea, R.J, Howard, J.A.K. & Puschmann, H.
 (2009), J. Appl. Cryst. 42, 339-341.

Sheldrick, G.M. (2008). Acta Cryst. A64, 112-122.
;
_chemical_name_common             ?
_chemical_name_systematic
;
 ?
;
_chemical_formula_moiety          'C14.63 H14.27 N4 O7 Y, 0.68(C2 H6 O)'
_chemical_formula_sum             'C16 H18.37 N4 O7.68 Y'
_chemical_formula_weight          478.56
_chemical_melting_point           ?
_chemical_oxdiff_formula          Y2C30H30N10O10
loop_
  _atom_type_symbol
  _atom_type_description
  _atom_type_scat_dispersion_real
  _atom_type_scat_dispersion_imag
  _atom_type_scat_source
 'C' 'C' 0.0181 0.0091 'International Tables Vol C Tables 4.2.6.8 and 6.1.1.4'
 'H' 'H' 0.0000 0.0000 'International Tables Vol C Tables 4.2.6.8 and 6.1.1.4'
 'N' 'N' 0.0311 0.0180 'International Tables Vol C Tables 4.2.6.8 and 6.1.1.4'
 'O' 'O' 0.0492 0.0322 'International Tables Vol C Tables 4.2.6.8 and 6.1.1.4'
 'Y' 'Y' -0.2670 2.0244 'International Tables Vol C Tables 4.2.6.8 and 6.1.1.4'

_shelx_space_group_comment
;
The symmetry employed for this shelxl refinement is uniquely defined
by the following loop, which should always be used as a source of
symmetry information in preference to the above space-group names.
They are only intended as comments.
;
_space_group_crystal_system       'orthorhombic'
_space_group_IT_number            61
_space_group_name_H-M_alt         'P b c a'
_space_group_name_Hall            '-P 2ac 2ab'
loop_
  _space_group_symop_operation_xyz
 'x, y, z'
 '-x+1/2, -y, z+1/2'
 '-x, y+1/2, -z+1/2'
 'x+1/2, -y+1/2, -z'
 '-x, -y, -z'
 'x-1/2, y, -z-1/2'
 'x, -y-1/2, z-1/2'
 '-x-1/2, y-1/2, z'

_cell_length_a                    14.6954(4)
_cell_length_b                    14.3307(6)
_cell_length_c                    18.2161(4)
_cell_angle_alpha                 90
_cell_angle_beta                  90
_cell_angle_gamma                 90
_cell_volume                      3836.2(2)
_cell_formula_units_Z             8
_cell_measurement_reflns_used     7320
_cell_measurement_temperature     173
_cell_measurement_theta_max       71.4960
_cell_measurement_theta_min       4.8560
_shelx_estimated_absorpt_T_max    ?
_shelx_estimated_absorpt_T_min    ?
_exptl_absorpt_coefficient_mu     4.750
_exptl_absorpt_correction_T_max   1.00000
_exptl_absorpt_correction_T_min   0.77825
_exptl_absorpt_correction_type    multi-scan
_exptl_absorpt_process_details
;
CrysAlisPro, Agilent Technologies,
Version 1.171.37.34i (release 04-08-2014 CrysAlis171 .NET)
(compiled Aug  4 2014,14:34:23)
Empirical absorption correction using spherical harmonics,
 implemented in SCALE3 ABSPACK scaling algorithm.
;
_exptl_crystal_colour             yellow
_exptl_crystal_colour_primary     yellow
_exptl_crystal_density_diffrn     1.657
_exptl_crystal_density_meas       ?
_exptl_crystal_density_method     ?
_exptl_crystal_description        plate
_exptl_crystal_F_000              1943
_exptl_crystal_size_max           0.1
_exptl_crystal_size_mid           0.1
_exptl_crystal_size_min           0.03
_exptl_special_details
;
 ?
;
_exptl_transmission_factor_max    ?
_exptl_transmission_factor_min    ?
_diffrn_reflns_av_R_equivalents   0.0687
_diffrn_reflns_av_unetI/netI      0.0380
_diffrn_reflns_Laue_measured_fraction_full 0.998
_diffrn_reflns_Laue_measured_fraction_max 0.993
_diffrn_reflns_limit_h_max        17
_diffrn_reflns_limit_h_min        -16
_diffrn_reflns_limit_k_max        15
_diffrn_reflns_limit_k_min        -17
_diffrn_reflns_limit_l_max        22
_diffrn_reflns_limit_l_min        -15
_diffrn_reflns_number             25890
_diffrn_reflns_point_group_measured_fraction_full 0.998
_diffrn_reflns_point_group_measured_fraction_max 0.993
_diffrn_reflns_theta_full         67.684
_diffrn_reflns_theta_max          71.620
_diffrn_reflns_theta_min          4.855
_diffrn_ambient_temperature       173
_diffrn_detector                  'CCD plate'
_diffrn_detector_area_resol_mean  16.1033
_diffrn_detector_type             Eos
_diffrn_measured_fraction_theta_full 0.998
_diffrn_measured_fraction_theta_max 0.993
_diffrn_measurement_details
;
#__ type_ start__ end____ width___ exp.time_
  1 omega  -14.00   65.00   1.0000   12.5000
omega____ theta____ kappa____ phi______ frames
    -       54.7500  -57.0000 -120.0000 79

#__ type_ start__ end____ width___ exp.time_
  2 omega   40.00   70.00   1.0000   12.5000
omega____ theta____ kappa____ phi______ frames
    -      109.5000  -38.0000 -180.0000 30

#__ type_ start__ end____ width___ exp.time_
  3 omega   38.00   70.00   1.0000   12.5000
omega____ theta____ kappa____ phi______ frames
    -      109.5000  -38.0000 -120.0000 32

#__ type_ start__ end____ width___ exp.time_
  4 omega   43.00   72.00   1.0000   12.5000
omega____ theta____ kappa____ phi______ frames
    -      109.5000  -25.0000  -90.0000 29

#__ type_ start__ end____ width___ exp.time_
  5 omega   40.00   66.00   1.0000   12.5000
omega____ theta____ kappa____ phi______ frames
    -      109.5000  -38.0000  -30.0000 26

#__ type_ start__ end____ width___ exp.time_
  6 omega   38.00   65.00   1.0000   12.5000
omega____ theta____ kappa____ phi______ frames
    -      109.5000  -25.0000  -60.0000 27

#__ type_ start__ end____ width___ exp.time_
  7 omega   38.00   64.00   1.0000   12.5000
omega____ theta____ kappa____ phi______ frames
    -      109.5000  -38.0000  -90.0000 26

#__ type_ start__ end____ width___ exp.time_
  8 omega   40.00  178.00   1.0000   12.5000
omega____ theta____ kappa____ phi______ frames
    -      109.5000    0.0000  -60.0000 138

#__ type_ start__ end____ width___ exp.time_
  9 omega  123.00  148.00   1.0000   12.5000
omega____ theta____ kappa____ phi______ frames
    -      109.5000  -92.0000  -90.0000 25

#__ type_ start__ end____ width___ exp.time_
 10 omega   98.00  148.00   1.0000   12.5000
omega____ theta____ kappa____ phi______ frames
    -      109.5000  -92.0000  -30.0000 50

#__ type_ start__ end____ width___ exp.time_
 11 omega   83.00  109.00   1.0000   12.5000
omega____ theta____ kappa____ phi______ frames
    -      109.5000  -92.0000  -90.0000 26

#__ type_ start__ end____ width___ exp.time_
 12 omega   51.00  142.00   1.0000   12.5000
omega____ theta____ kappa____ phi______ frames
    -      109.5000  -92.0000 -150.0000 91

#__ type_ start__ end____ width___ exp.time_
 13 omega   48.00   79.00   1.0000   12.5000
omega____ theta____ kappa____ phi______ frames
    -      109.5000  -92.0000  -90.0000 31

#__ type_ start__ end____ width___ exp.time_
 14 omega   40.00   70.00   1.0000   12.5000
omega____ theta____ kappa____ phi______ frames
    -      109.5000  -38.0000 -150.0000 30

#__ type_ start__ end____ width___ exp.time_
 15 omega   37.00   70.00   1.0000   12.5000
omega____ theta____ kappa____ phi______ frames
    -      109.5000  -38.0000    0.0000 33

#__ type_ start__ end____ width___ exp.time_
 16 omega   42.00   70.00   1.0000   12.5000
omega____ theta____ kappa____ phi______ frames
    -      109.5000  -38.0000   30.0000 28

#__ type_ start__ end____ width___ exp.time_
 17 omega   42.00   72.00   1.0000   12.5000
omega____ theta____ kappa____ phi______ frames
    -      109.5000  -25.0000   90.0000 30

#__ type_ start__ end____ width___ exp.time_
 18 omega   43.00   68.00   1.0000   12.5000
omega____ theta____ kappa____ phi______ frames
    -      109.5000  -38.0000  120.0000 25

#__ type_ start__ end____ width___ exp.time_
 19 omega   43.00   69.00   1.0000   12.5000
omega____ theta____ kappa____ phi______ frames
    -      109.5000  -38.0000  150.0000 26

#__ type_ start__ end____ width___ exp.time_
 20 omega   38.00   64.00   1.0000   12.5000
omega____ theta____ kappa____ phi______ frames
    -      109.5000  -25.0000  120.0000 26

#__ type_ start__ end____ width___ exp.time_
 21 omega   39.00   70.00   1.0000   12.5000
omega____ theta____ kappa____ phi______ frames
    -      109.5000  -38.0000   60.0000 31

#__ type_ start__ end____ width___ exp.time_
 22 omega   42.00  105.00   1.0000   12.5000
omega____ theta____ kappa____ phi______ frames
    -      109.5000  -92.0000    0.0000 63

#__ type_ start__ end____ width___ exp.time_
 23 omega   55.00  132.00   1.0000   12.5000
omega____ theta____ kappa____ phi______ frames
    -      109.5000  -93.0000   70.1199 77

#__ type_ start__ end____ width___ exp.time_
 24 omega   81.00  107.00   1.0000   12.5000
omega____ theta____ kappa____ phi______ frames
    -      109.5000  -92.0000  150.0000 26

#__ type_ start__ end____ width___ exp.time_
 25 omega   98.00  123.00   1.0000   12.5000
omega____ theta____ kappa____ phi______ frames
    -       54.7500   57.0000   30.0000 25

#__ type_ start__ end____ width___ exp.time_
 26 omega   73.00   98.00   1.0000   12.5000
omega____ theta____ kappa____ phi______ frames
    -       54.7500  125.0000  -60.0000 25

#__ type_ start__ end____ width___ exp.time_
 27 omega   62.00  127.00   1.0000   12.5000
omega____ theta____ kappa____ phi______ frames
    -      109.5000  178.0000 -120.0000 65

#__ type_ start__ end____ width___ exp.time_
 28 omega   25.00  116.00   1.0000   12.5000
omega____ theta____ kappa____ phi______ frames
    -       54.7500   77.0000    0.0000 91

#__ type_ start__ end____ width___ exp.time_
 29 omega    1.00   28.00   1.0000    5.0000
omega____ theta____ kappa____ phi______ frames
    -        0.0000  -77.0000 -180.0000 27

#__ type_ start__ end____ width___ exp.time_
 30 omega  -22.00   32.00   1.0000    5.0000
omega____ theta____ kappa____ phi______ frames
    -        0.0000  -99.0000  -90.0000 54

#__ type_ start__ end____ width___ exp.time_
 31 omega  -16.00   36.00   1.0000    5.0000
omega____ theta____ kappa____ phi______ frames
    -        0.0000  -99.0000   60.0000 52

#__ type_ start__ end____ width___ exp.time_
 32 omega  -73.00  -19.00   1.0000   12.5000
omega____ theta____ kappa____ phi______ frames
    -      -54.7500   57.0000  120.0000 54

#__ type_ start__ end____ width___ exp.time_
 33 omega -102.00  -74.00   1.0000   12.5000
omega____ theta____ kappa____ phi______ frames
    -      -54.7500  -57.0000  -30.0000 28

#__ type_ start__ end____ width___ exp.time_
 34 omega  -67.00  -15.00   1.0000    5.0000
omega____ theta____ kappa____ phi______ frames
    -        0.0000  -77.0000 -180.0000 52

#__ type_ start__ end____ width___ exp.time_
 35 omega -119.00  -40.00   1.0000   12.5000
omega____ theta____ kappa____ phi______ frames
    -      -54.7500  -57.0000  120.0000 79

#__ type_ start__ end____ width___ exp.time_
 36 omega -112.00  -18.00   1.0000   12.5000
omega____ theta____ kappa____ phi______ frames
    -      -54.7500  125.0000  150.0000 94
;
_diffrn_measurement_device        'four-circle diffractometer'
_diffrn_measurement_device_type   'Xcalibur, Eos, Gemini ultra'
_diffrn_measurement_method        '\w scans'
_diffrn_orient_matrix_UB_11       -0.0191800000
_diffrn_orient_matrix_UB_12       -0.0990951000
_diffrn_orient_matrix_UB_13       -0.0289209000
_diffrn_orient_matrix_UB_21       0.1013130000
_diffrn_orient_matrix_UB_22       -0.0111914000
_diffrn_orient_matrix_UB_23       -0.0198606000
_diffrn_orient_matrix_UB_31       0.0189389000
_diffrn_orient_matrix_UB_32       -0.0401574000
_diffrn_orient_matrix_UB_33       0.0769435000
_diffrn_radiation_monochromator   mirror
_diffrn_radiation_probe           x-ray
_diffrn_radiation_type            CuK\a
_diffrn_radiation_wavelength      1.54184
_diffrn_source                    'sealed X-ray tube'
_diffrn_source_type               'Enhance Ultra (Cu) X-ray Source'
_reflns_Friedel_coverage          0.000
_reflns_Friedel_fraction_full     .
_reflns_Friedel_fraction_max      .
_reflns_number_gt                 2838
_reflns_number_total              3721
_reflns_odcompleteness_completeness 99.92
_reflns_odcompleteness_iscentric  1
_reflns_odcompleteness_theta      66.97
_reflns_special_details
;
 Reflections were merged by SHELXL according to the crystal
 class for the calculation of statistics and refinement.
 
 _reflns_Friedel_fraction is defined as the number of unique
 Friedel pairs measured divided by the number that would be
 possible theoretically, ignoring centric projections and
 systematic absences.
;
_reflns_threshold_expression      'I > 2\s(I)'
_computing_cell_refinement
;
CrysAlisPro, Agilent Technologies,
Version 1.171.37.34i (release 04-08-2014 CrysAlis171 .NET)
(compiled Aug  4 2014,14:34:23)
;
_computing_data_collection
;
CrysAlisPro, Agilent Technologies,
Version 1.171.37.34i (release 04-08-2014 CrysAlis171 .NET)
(compiled Aug  4 2014,14:34:23)
;
_computing_data_reduction
;
CrysAlisPro, Agilent Technologies,
Version 1.171.37.34i (release 04-08-2014 CrysAlis171 .NET)
(compiled Aug  4 2014,14:34:23)
;
_computing_molecular_graphics     'Olex2 (Dolomanov et al., 2009)'
_computing_publication_material   'Olex2 (Dolomanov et al., 2009)'
_computing_structure_refinement   'ShelXL (Sheldrick, 2008)'
_computing_structure_solution     ?
_refine_diff_density_max          1.334
_refine_diff_density_min          -0.698
_refine_diff_density_rms          0.098
_refine_ls_extinction_coef        .
_refine_ls_extinction_method      none
_refine_ls_goodness_of_fit_ref    1.054
_refine_ls_hydrogen_treatment     mixed
_refine_ls_matrix_type            full
_refine_ls_number_parameters      287
_refine_ls_number_reflns          3721
_refine_ls_number_restraints      32
_refine_ls_R_factor_all           0.0612
_refine_ls_R_factor_gt            0.0447
_refine_ls_restrained_S_all       1.055
_refine_ls_shift/su_max           0.000
_refine_ls_shift/su_mean          0.000
_refine_ls_structure_factor_coef  Fsqd
_refine_ls_weighting_details
'w=1/[\s^2^(Fo^2^)+(0.0634P)^2^+3.5500P] where P=(Fo^2^+2Fc^2^)/3'
_refine_ls_weighting_scheme       calc
_refine_ls_wR_factor_gt           0.1075
_refine_ls_wR_factor_ref          0.1183
_refine_special_details
;
 ?
;
_olex2_refinement_description
;
1. Fixed Uiso
 At 1.2 times of:
  All C(H) groups, All C(H,H) groups
 At 1.5 times of:
  All C(H,H,H) groups, All O(H) groups, All O(H,H) groups
2. Restrained distances
 C1-C2
 1.53 with sigma of 0.02
 C1-O1
 1.43 with sigma of 0.02
 C0AA-C1A
 1.43 with sigma of 0.02
 O005-C1A
 1.48 with sigma of 0.02
 O0-H0
 0.85 with sigma of 0.01
 C1A-H0
 2.019226 with sigma of 0.02
 Y001-H0
 3.100199 with sigma of 0.02
3. Rigid bond restraints
 C00M
 with sigma for 1-2 distances of 0.01 and sigma for 1-3 distances of 0.01
 O005
 with sigma for 1-2 distances of 0.01 and sigma for 1-3 distances of 0.01
 C2, O1, C1
 with sigma for 1-2 distances of 0.01 and sigma for 1-3 distances of 0.01
 O0, O005
 with sigma for 1-2 distances of 0.01 and sigma for 1-3 distances of 0.01
4. Uiso/Uaniso restraints and constraints
C1 \\sim O1 \\sim C2: within 1.7A with sigma of 0.04 and sigma for terminal
atoms of 0.08
O0 \\sim O005: within 1.7A with sigma of 0.04 and sigma for terminal atoms of
0.08
: with sigma of 0.1 and sigma for terminal atoms of 0.2
5. Rigid body (RIGU) restrains
 C1, O1, C2
 with sigma for 1-2 distances of 0.004 and sigma for 1-3 distances of 0.004
 O0, O005
 with sigma for 1-2 distances of 0.004 and sigma for 1-3 distances of 0.004
6. Others
 Fixed Sof: O005(0.6832) H00A(0.6832) H00B(0.6832) O1(0.6832) H1(0.6832)
 C1(0.6832) H1A(0.6832) H1B(0.6832) C2(0.6832) H2A(0.6832) H2B(0.6832)
 H2C(0.6832) C1A(0.3168) H1AA(0.3168) H1AB(0.3168) C0AA(0.3168) H0AA(0.3168)
 H0AB(0.3168) H0AC(0.3168) O0(0.3168) H0(0.3168)
7.a Rotating group:
 O005(H00A,H00B)
7.b Secondary CH2 refined with riding coordinates:
 C1(H1A,H1B), C1A(H1AA,H1AB)
7.c Aromatic/amide H refined with riding coordinates:
 C00I(H00I), C00J(H00J), C00K(H00K), C00L(H00L), C00M(H00M), C00N(H00N),
 C00O(H00O), C00P(H00P)
7.d Idealised Me refined as rotating group:
 C00Q(H00C,H00D,H00E), C2(H2A,H2B,H2C), C0AA(H0AA,H0AB,H0AC)
7.e Idealised tetrahedral OH refined as rotating group:
 O1(H1)
;
_atom_sites_solution_hydrogens    mixed
_atom_sites_solution_primary      ?
_atom_sites_solution_secondary    ?
loop_
  _atom_site_label
  _atom_site_type_symbol
  _atom_site_fract_x
  _atom_site_fract_y
  _atom_site_fract_z
  _atom_site_U_iso_or_equiv
  _atom_site_adp_type
  _atom_site_occupancy
  _atom_site_site_symmetry_order
  _atom_site_calc_flag
  _atom_site_refinement_flags_posn
  _atom_site_refinement_flags_adp
  _atom_site_refinement_flags_occupancy
  _atom_site_disorder_assembly
  _atom_site_disorder_group
 Y001 Y 0.43354(2) 0.44743(3) 0.42168(2) 0.02676(13) Uani 1 1 d D . . . .
 O002 O 0.45074(17) 0.4459(2) 0.54781(14) 0.0288(6) Uani 1 1 d . . . . .
 O003 O 0.32810(17) 0.4286(2) 0.33423(14) 0.0339(7) Uani 1 1 d . . . . .
 O004 O 0.54819(17) 0.4192(2) 0.66636(15) 0.0345(7) Uani 1 1 d . . . . .
 O005_a O 0.3362(4) 0.5689(4) 0.4568(4) 0.0355(17) Uiso 0.6832 1 d D U P A 1
 H00A_a H 0.3605 0.6224 0.4455 0.053 Uiso 0.6832 1 d GR . P A 1
 H00B_a H 0.3254 0.5688 0.5040 0.053 Uiso 0.6832 1 d GR . P A 1
 N006 N 0.2924(2) 0.3785(2) 0.46744(17) 0.0302(7) Uani 1 1 d . . . . .
 N007 N 0.2212(2) 0.3697(3) 0.41553(17) 0.0318(7) Uani 1 1 d . . . . .
 N008 N 0.0489(2) 0.4109(3) 0.17884(17) 0.0311(7) Uani 1 1 d . . . . .
 O009 O 0.4327(2) 0.2733(3) 0.3933(2) 0.0523(9) Uani 1 1 d . . . . .
 O00A O 0.5420(3) 0.3198(3) 0.45862(19) 0.0557(9) Uani 1 1 d . . . . .
 N00B N 0.5069(3) 0.2557(3) 0.4198(2) 0.0453(9) Uani 1 1 d . . . . .
 O00C O 0.5481(3) 0.1821(3) 0.4078(2) 0.0695(12) Uani 1 1 d . . . . .
 C00D C 0.2478(2) 0.3989(3) 0.3510(2) 0.0299(8) Uani 1 1 d . . . . .
 C00E C 0.3268(3) 0.3500(3) 0.5965(2) 0.0296(8) Uani 1 1 d . . . . .
 C00F C 0.4132(2) 0.3912(3) 0.6007(2) 0.0281(8) Uani 1 1 d . . . . .
 C00G C 0.4629(3) 0.3784(3) 0.6658(2) 0.0314(8) Uani 1 1 d . . . . .
 C00H C 0.1782(2) 0.3994(3) 0.2921(2) 0.0302(8) Uani 1 1 d . . . . .
 C00I C 0.2037(3) 0.4157(3) 0.2200(2) 0.0306(8) Uani 1 1 d . . . . .
 H00I H 0.2661 0.4240 0.2080 0.037 Uiso 1 1 calc R . . . .
 C00J C 0.4268(3) 0.3325(3) 0.7265(2) 0.0374(9) Uani 1 1 d . . . . .
 H00J H 0.4612 0.3267 0.7704 0.045 Uiso 1 1 calc R . . . .
 C00K C 0.2686(2) 0.3508(3) 0.5322(2) 0.0311(9) Uani 1 1 d . . . . .
 H00K H 0.2080 0.3291 0.5382 0.037 Uiso 1 1 calc R . . . .
 C00L C 0.1386(3) 0.4198(3) 0.1656(2) 0.0331(9) Uani 1 1 d . . . . .
 H00L H 0.1579 0.4294 0.1165 0.040 Uiso 1 1 calc R . . . .
 C00M C 0.0853(3) 0.3877(3) 0.3063(2) 0.0368(10) Uani 1 1 d . U . . .
 H00M H 0.0647 0.3751 0.3547 0.044 Uiso 1 1 calc R . . . .
 C00N C 0.0240(3) 0.3948(3) 0.2491(2) 0.0378(10) Uani 1 1 d . . . . .
 H00N H -0.0389 0.3880 0.2597 0.045 Uiso 1 1 calc R . . . .
 C00O C 0.2912(3) 0.3036(3) 0.6578(2) 0.0371(9) Uani 1 1 d . . . . .
 H00O H 0.2320 0.2773 0.6550 0.045 Uiso 1 1 calc R . . . .
 C00P C 0.3397(3) 0.2954(3) 0.7217(2) 0.0421(11) Uani 1 1 d . . . . .
 H00P H 0.3137 0.2642 0.7627 0.050 Uiso 1 1 calc R . . . .
 C00Q C 0.6114(3) 0.3857(4) 0.7201(3) 0.0501(13) Uani 1 1 d . . . . .
 H00C H 0.6727 0.4081 0.7082 0.075 Uiso 1 1 calc GR . . . .
 H00D H 0.6111 0.3173 0.7202 0.075 Uiso 1 1 calc GR . . . .
 H00E H 0.5938 0.4087 0.7688 0.075 Uiso 1 1 calc GR . . . .
 O1_a O 0.1631(5) 0.5986(5) 0.4299(5) 0.089(2) Uani 0.6832 1 d D U P B 1
 H1_a H 0.1915 0.5592 0.4046 0.133 Uiso 0.6832 1 calc GR . P B 1
 C1_a C 0.1026(7) 0.5508(8) 0.4802(6) 0.083(3) Uani 0.6832 1 d D U P B 1
 H1A_a H 0.1149 0.4829 0.4789 0.100 Uiso 0.6832 1 calc R . P B 1
 H1B_a H 0.0386 0.5611 0.4653 0.100 Uiso 0.6832 1 calc R . P B 1
 C2_a C 0.1171(9) 0.5868(12) 0.5553(7) 0.121(5) Uani 0.6832 1 d D U P B 1
 H2A_a H 0.0805 0.6432 0.5625 0.182 Uiso 0.6832 1 calc GR . P B 1
 H2B_a H 0.1816 0.6018 0.5622 0.182 Uiso 0.6832 1 calc GR . P B 1
 H2C_a H 0.0988 0.5393 0.5911 0.182 Uiso 0.6832 1 calc GR . P B 1
 C1A_b C 0.2421(8) 0.6097(12) 0.4443(9) 0.060(5) Uani 0.3168 1 d D . P A 2
 H1AA_b H 0.2368 0.6733 0.4236 0.072 Uiso 0.3168 1 calc R . P A 2
 H1AB_b H 0.2204 0.5657 0.4062 0.072 Uiso 0.3168 1 calc R . P A 2
 C0AA_b C 0.1805(10) 0.6034(14) 0.5065(10) 0.062(5) Uani 0.3168 1 d D . P A 2
 H0AA_b H 0.1189 0.6202 0.4908 0.093 Uiso 0.3168 1 calc GR . P A 2
 H0AB_b H 0.2006 0.6463 0.5451 0.093 Uiso 0.3168 1 calc GR . P A 2
 H0AC_b H 0.1806 0.5394 0.5255 0.093 Uiso 0.3168 1 calc GR . P A 2
 O0_b O 0.3383(8) 0.5910(9) 0.4568(7) 0.031(3) Uiso 0.3168 1 d D U P A 2
 H0_b H 0.367(3) 0.636(4) 0.478(7) 0.047 Uiso 0.3168 1 d DR . P C 2

loop_
  _atom_site_aniso_label
  _atom_site_aniso_U_11
  _atom_site_aniso_U_22
  _atom_site_aniso_U_33
  _atom_site_aniso_U_23
  _atom_site_aniso_U_13
  _atom_site_aniso_U_12
 Y001 0.01711(18) 0.0489(2) 0.01430(18) 0.00004(13) -0.00029(11) -0.00361(13)
 O002 0.0223(13) 0.0492(16) 0.0148(13) 0.0018(11) 0.0004(10) -0.0074(11)
 O003 0.0199(13) 0.0624(19) 0.0195(13) 0.0032(12) -0.0021(10) -0.0070(12)
 O004 0.0228(13) 0.0585(18) 0.0223(14) 0.0068(13) -0.0061(11) -0.0018(12)
 N006 0.0200(15) 0.050(2) 0.0204(15) -0.0006(14) -0.0021(12) -0.0056(13)
 N007 0.0187(15) 0.055(2) 0.0215(16) 0.0027(15) -0.0042(12) -0.0060(14)
 N008 0.0212(16) 0.051(2) 0.0214(16) -0.0026(15) -0.0057(12) -0.0020(14)
 O009 0.0333(17) 0.058(2) 0.066(2) -0.0086(18) 0.0084(16) -0.0039(15)
 O00A 0.080(2) 0.055(2) 0.0328(18) -0.0030(16) -0.0131(17) -0.0044(18)
 N00B 0.053(2) 0.050(2) 0.033(2) -0.0031(18) -0.0015(18) -0.0081(19)
 O00C 0.068(3) 0.063(3) 0.077(3) -0.020(2) -0.015(2) 0.017(2)
 C00D 0.0207(17) 0.047(2) 0.0223(18) -0.0044(17) -0.0024(15) -0.0010(16)
 C00E 0.0261(19) 0.043(2) 0.0193(18) 0.0043(16) 0.0007(14) -0.0022(16)
 C00F 0.0237(18) 0.043(2) 0.0173(17) 0.0016(16) 0.0022(14) -0.0016(16)
 C00G 0.0235(18) 0.044(2) 0.027(2) 0.0005(18) -0.0017(15) -0.0027(16)
 C00H 0.0224(18) 0.047(2) 0.0207(18) -0.0005(17) -0.0046(14) 0.0013(16)
 C00I 0.0214(18) 0.045(2) 0.0254(19) -0.0009(17) -0.0009(15) 0.0009(16)
 C00J 0.035(2) 0.056(3) 0.022(2) 0.0096(19) -0.0034(16) -0.0036(19)
 C00K 0.0213(18) 0.053(3) 0.0188(18) 0.0003(17) 0.0006(14) -0.0043(17)
 C00L 0.025(2) 0.050(2) 0.0239(19) -0.0004(18) 0.0000(15) 0.0030(17)
 C00M 0.0245(19) 0.060(3) 0.026(2) 0.0007(19) -0.0019(15) -0.0065(18)
 C00N 0.0206(19) 0.064(3) 0.029(2) 0.001(2) -0.0033(16) -0.0039(18)
 C00O 0.030(2) 0.052(3) 0.029(2) 0.0046(19) 0.0004(17) -0.0105(18)
 C00P 0.041(2) 0.059(3) 0.026(2) 0.010(2) 0.0030(18) -0.010(2)
 C00Q 0.034(2) 0.068(3) 0.049(3) 0.021(2) -0.021(2) -0.008(2)
 O1_a 0.055(4) 0.097(5) 0.115(6) 0.010(4) 0.002(3) 0.019(4)
 C1_a 0.067(6) 0.089(7) 0.093(6) -0.006(5) 0.002(5) 0.017(5)
 C2_a 0.071(7) 0.184(14) 0.109(7) -0.046(7) 0.012(6) -0.023(8)
 C1A_b 0.040(9) 0.062(11) 0.078(12) -0.016(9) -0.006(8) -0.013(8)
 C0AA_b 0.029(8) 0.083(13) 0.073(12) -0.029(11) 0.010(8) 0.003(8)

_geom_special_details
;
 All esds (except the esd in the dihedral angle between two l.s. planes)
 are estimated using the full covariance matrix.  The cell esds are taken
 into account individually in the estimation of esds in distances, angles
 and torsion angles; correlations between esds in cell parameters are only
 used when they are defined by crystal symmetry.  An approximate (isotropic)
 treatment of cell esds is used for estimating esds involving l.s. planes.
;
loop_
  _geom_bond_atom_site_label_1
  _geom_bond_atom_site_label_2
  _geom_bond_distance
  _geom_bond_site_symmetry_2
  _geom_bond_publ_flag
 Y001 Y001 3.7720(6) 5_666 ?
 Y001 O002 2.312(3) . ?
 Y001 O002 2.353(3) 5_666 ?
 Y001 O003 2.239(3) . ?
 Y001 O004 2.509(3) 5_666 ?
 Y001 O005_a 2.342(6) . ?
 Y001 N006 2.444(3) . ?
 Y001 N008 2.550(3) 6_656 ?
 Y001 O009 2.549(4) . ?
 Y001 O00A 2.518(4) . ?
 Y001 N00B 2.951(4) . ?
 Y001 O0_b 2.570(13) . ?
 O002 Y001 2.353(3) 5_666 ?
 O002 C00F 1.359(5) . ?
 O003 C00D 1.290(4) . ?
 O004 Y001 2.509(3) 5_666 ?
 O004 C00G 1.384(4) . ?
 O004 C00Q 1.433(5) . ?
 O005_a H00A_a 0.8710 . ?
 O005_a H00B_a 0.8728 . ?
 N006 N007 1.416(4) . ?
 N006 C00K 1.294(5) . ?
 N007 C00D 1.308(5) . ?
 N008 Y001 2.550(3) 6_556 ?
 N008 C00L 1.345(5) . ?
 N008 C00N 1.350(5) . ?
 O009 N00B 1.219(5) . ?
 O00A N00B 1.269(5) . ?
 N00B O00C 1.237(5) . ?
 C00D C00H 1.483(5) . ?
 C00E C00F 1.402(5) . ?
 C00E C00K 1.450(5) . ?
 C00E C00O 1.401(5) . ?
 C00F C00G 1.405(5) . ?
 C00G C00J 1.390(6) . ?
 C00H C00I 1.385(5) . ?
 C00H C00M 1.399(5) . ?
 C00I H00I 0.9500 . ?
 C00I C00L 1.378(5) . ?
 C00J H00J 0.9500 . ?
 C00J C00P 1.390(6) . ?
 C00K H00K 0.9500 . ?
 C00L H00L 0.9500 . ?
 C00M H00M 0.9500 . ?
 C00M C00N 1.381(5) . ?
 C00N H00N 0.9500 . ?
 C00O H00O 0.9500 . ?
 C00O C00P 1.370(6) . ?
 C00P H00P 0.9500 . ?
 C00Q H00C 0.9800 . ?
 C00Q H00D 0.9800 . ?
 C00Q H00E 0.9800 . ?
 O1_a H1_a 0.8400 . ?
 O1_a C1_a 1.449(11) . ?
 C1_a H1A_a 0.9900 . ?
 C1_a H1B_a 0.9900 . ?
 C1_a C2_a 1.478(12) . ?
 C2_a H2A_a 0.9800 . ?
 C2_a H2B_a 0.9800 . ?
 C2_a H2C_a 0.9800 . ?
 C1A_b H1AA_b 0.9900 . ?
 C1A_b H1AB_b 0.9900 . ?
 C1A_b C0AA_b 1.453(16) . ?
 C1A_b O0_b 1.456(18) . ?
 C0AA_b H0AA_b 0.9800 . ?
 C0AA_b H0AB_b 0.9800 . ?
 C0AA_b H0AC_b 0.9800 . ?
 O0_b H0_b 0.865(10) . ?

loop_
  _geom_angle_atom_site_label_1
  _geom_angle_atom_site_label_2
  _geom_angle_atom_site_label_3
  _geom_angle
  _geom_angle_site_symmetry_1
  _geom_angle_site_symmetry_3
  _geom_angle_publ_flag
 O002 Y001 Y001 35.67(6) 5_666 5_666 ?
 O002 Y001 Y001 36.41(6) . 5_666 ?
 O002 Y001 O002 72.08(10) . 5_666 ?
 O002 Y001 O004 129.10(10) . 5_666 ?
 O002 Y001 O004 65.09(9) 5_666 5_666 ?
 O002 Y001 O005_a 78.57(18) . . ?
 O002 Y001 N006 142.69(10) 5_666 . ?
 O002 Y001 N006 75.52(10) . . ?
 O002 Y001 N008 79.78(10) 5_666 6_656 ?
 O002 Y001 N008 129.72(10) . 6_656 ?
 O002 Y001 O009 133.43(10) 5_666 . ?
 O002 Y001 O009 101.13(11) . . ?
 O002 Y001 O00A 70.02(11) . . ?
 O002 Y001 O00A 87.20(11) 5_666 . ?
 O002 Y001 N00B 110.09(10) 5_666 . ?
 O002 Y001 N00B 87.86(10) . . ?
 O002 Y001 O0_b 79.3(3) 5_666 . ?
 O002 Y001 O0_b 79.6(3) . . ?
 O003 Y001 Y001 160.88(8) . 5_666 ?
 O003 Y001 O002 141.43(9) . . ?
 O003 Y001 O002 138.29(10) . 5_666 ?
 O003 Y001 O004 73.20(9) . 5_666 ?
 O003 Y001 O005_a 82.03(17) . . ?
 O003 Y001 N006 66.83(10) . . ?
 O003 Y001 N008 85.68(10) . 6_656 ?
 O003 Y001 O009 74.59(11) . . ?
 O003 Y001 O00A 122.75(11) . . ?
 O003 Y001 N00B 97.62(11) . . ?
 O003 Y001 O0_b 84.1(3) . . ?
 O004 Y001 Y001 97.11(6) 5_666 5_666 ?
 O004 Y001 N008 68.07(10) 5_666 6_656 ?
 O004 Y001 O009 128.07(11) 5_666 . ?
 O004 Y001 O00A 131.02(11) 5_666 . ?
 O004 Y001 N00B 131.51(10) 5_666 . ?
 O004 Y001 O0_b 66.9(3) 5_666 . ?
 O005_a Y001 Y001 79.19(16) . 5_666 ?
 O005_a Y001 O002 83.92(17) . 5_666 ?
 O005_a Y001 O004 70.98(17) . 5_666 ?
 O005_a Y001 N006 71.86(18) . . ?
 O005_a Y001 N008 139.04(18) . 6_656 ?
 O005_a Y001 O009 141.28(17) . . ?
 O005_a Y001 O00A 148.58(18) . . ?
 O005_a Y001 N00B 156.62(18) . . ?
 N006 Y001 Y001 110.06(7) . 5_666 ?
 N006 Y001 O004 128.07(10) . 5_666 ?
 N006 Y001 N008 136.57(11) . 6_656 ?
 N006 Y001 O009 70.70(11) . . ?
 N006 Y001 O00A 98.78(12) . . ?
 N006 Y001 N00B 86.42(12) . . ?
 N006 Y001 O0_b 77.1(3) . . ?
 N008 Y001 Y001 106.32(7) 6_656 5_666 ?
 N008 Y001 N00B 63.75(11) 6_656 . ?
 N008 Y001 O0_b 134.9(3) 6_656 . ?
 O009 Y001 Y001 123.17(9) . 5_666 ?
 O009 Y001 N008 69.89(11) . 6_656 ?
 O009 Y001 N00B 24.21(10) . . ?
 O009 Y001 O0_b 146.3(3) . . ?
 O00A Y001 Y001 76.12(8) . 5_666 ?
 O00A Y001 N008 67.76(11) . 6_656 ?
 O00A Y001 O009 49.16(11) . . ?
 O00A Y001 N00B 25.26(11) . . ?
 O00A Y001 O0_b 149.3(3) . . ?
 N00B Y001 Y001 101.03(8) . 5_666 ?
 O0_b Y001 Y001 76.9(3) . 5_666 ?
 O0_b Y001 N00B 161.3(3) . . ?
 Y001 O002 Y001 107.92(10) . 5_666 ?
 C00F O002 Y001 131.7(2) . . ?
 C00F O002 Y001 120.0(2) . 5_666 ?
 C00D O003 Y001 120.3(2) . . ?
 C00G O004 Y001 114.5(2) . 5_666 ?
 C00G O004 C00Q 116.8(3) . . ?
 C00Q O004 Y001 128.5(3) . 5_666 ?
 Y001 O005_a H00A_a 109.8 . . ?
 Y001 O005_a H00B_a 112.3 . . ?
 H00A_a O005_a H00B_a 108.1 . . ?
 N007 N006 Y001 115.8(2) . . ?
 C00K N006 Y001 131.7(3) . . ?
 C00K N006 N007 112.5(3) . . ?
 C00D N007 N006 110.5(3) . . ?
 C00L N008 Y001 120.2(3) . 6_556 ?
 C00L N008 C00N 116.8(3) . . ?
 C00N N008 Y001 122.3(2) . 6_556 ?
 N00B O009 Y001 96.7(3) . . ?
 N00B O00A Y001 96.9(3) . . ?
 O009 N00B Y001 59.1(2) . . ?
 O009 N00B O00A 115.8(4) . . ?
 O009 N00B O00C 122.9(4) . . ?
 O00A N00B Y001 57.9(2) . . ?
 O00C N00B Y001 167.3(4) . . ?
 O00C N00B O00A 121.2(4) . . ?
 O003 C00D N007 126.3(3) . . ?
 O003 C00D C00H 117.2(3) . . ?
 N007 C00D C00H 116.5(3) . . ?
 C00F C00E C00K 125.1(3) . . ?
 C00O C00E C00F 119.7(4) . . ?
 C00O C00E C00K 115.3(3) . . ?
 O002 C00F C00E 124.9(3) . . ?
 O002 C00F C00G 117.6(3) . . ?
 C00E C00F C00G 117.5(3) . . ?
 O004 C00G C00F 114.9(3) . . ?
 O004 C00G C00J 122.6(4) . . ?
 C00J C00G C00F 122.4(4) . . ?
 C00I C00H C00D 120.0(3) . . ?
 C00I C00H C00M 117.3(4) . . ?
 C00M C00H C00D 122.6(4) . . ?
 C00H C00I H00I 120.0 . . ?
 C00L C00I C00H 120.0(4) . . ?
 C00L C00I H00I 120.0 . . ?
 C00G C00J H00J 120.6 . . ?
 C00P C00J C00G 118.8(4) . . ?
 C00P C00J H00J 120.6 . . ?
 N006 C00K C00E 125.4(3) . . ?
 N006 C00K H00K 117.3 . . ?
 C00E C00K H00K 117.3 . . ?
 N008 C00L C00I 123.2(4) . . ?
 N008 C00L H00L 118.4 . . ?
 C00I C00L H00L 118.4 . . ?
 C00H C00M H00M 120.4 . . ?
 C00N C00M C00H 119.2(4) . . ?
 C00N C00M H00M 120.4 . . ?
 N008 C00N C00M 123.4(4) . . ?
 N008 C00N H00N 118.3 . . ?
 C00M C00N H00N 118.3 . . ?
 C00E C00O H00O 119.2 . . ?
 C00P C00O C00E 121.6(4) . . ?
 C00P C00O H00O 119.2 . . ?
 C00J C00P H00P 120.0 . . ?
 C00O C00P C00J 120.0(4) . . ?
 C00O C00P H00P 120.0 . . ?
 O004 C00Q H00C 109.5 . . ?
 O004 C00Q H00D 109.5 . . ?
 O004 C00Q H00E 109.5 . . ?
 H00C C00Q H00D 109.5 . . ?
 H00C C00Q H00E 109.5 . . ?
 H00D C00Q H00E 109.5 . . ?
 C1_a O1_a H1_a 109.5 . . ?
 O1_a C1_a H1A_a 109.8 . . ?
 O1_a C1_a H1B_a 109.8 . . ?
 O1_a C1_a C2_a 109.4(10) . . ?
 H1A_a C1_a H1B_a 108.2 . . ?
 C2_a C1_a H1A_a 109.8 . . ?
 C2_a C1_a H1B_a 109.8 . . ?
 C1_a C2_a H2A_a 109.5 . . ?
 C1_a C2_a H2B_a 109.5 . . ?
 C1_a C2_a H2C_a 109.5 . . ?
 H2A_a C2_a H2B_a 109.5 . . ?
 H2A_a C2_a H2C_a 109.5 . . ?
 H2B_a C2_a H2C_a 109.5 . . ?
 H1AA_b C1A_b H1AB_b 107.1 . . ?
 C0AA_b C1A_b H1AA_b 107.8 . . ?
 C0AA_b C1A_b H1AB_b 107.8 . . ?
 C0AA_b C1A_b O0_b 118.1(14) . . ?
 O0_b C1A_b H1AA_b 107.8 . . ?
 O0_b C1A_b H1AB_b 107.8 . . ?
 C1A_b C0AA_b H0AA_b 109.5 . . ?
 C1A_b C0AA_b H0AB_b 109.5 . . ?
 C1A_b C0AA_b H0AC_b 109.5 . . ?
 H0AA_b C0AA_b H0AB_b 109.5 . . ?
 H0AA_b C0AA_b H0AC_b 109.5 . . ?
 H0AB_b C0AA_b H0AC_b 109.5 . . ?
 Y001 O0_b H0_b 116.5(18) . . ?
 C1A_b O0_b Y001 129.5(9) . . ?
 C1A_b O0_b H0_b 114(2) . . ?

loop_
  _geom_torsion_atom_site_label_1
  _geom_torsion_atom_site_label_2
  _geom_torsion_atom_site_label_3
  _geom_torsion_atom_site_label_4
  _geom_torsion
  _geom_torsion_site_symmetry_1
  _geom_torsion_site_symmetry_2
  _geom_torsion_site_symmetry_3
  _geom_torsion_site_symmetry_4
  _geom_torsion_publ_flag
 Y001 O002 C00F C00E 157.1(3) 5_666 . . . ?
 Y001 O002 C00F C00E -30.2(6) . . . . ?
 Y001 O002 C00F C00G -19.8(5) 5_666 . . . ?
 Y001 O002 C00F C00G 153.0(3) . . . . ?
 Y001 O003 C00D N007 -6.2(6) . . . . ?
 Y001 O003 C00D C00H 172.5(3) . . . . ?
 Y001 O004 C00G C00F 23.3(4) 5_666 . . . ?
 Y001 O004 C00G C00J -153.4(4) 5_666 . . . ?
 Y001 N006 N007 C00D 1.9(4) . . . . ?
 Y001 N006 C00K C00E -3.6(7) . . . . ?
 Y001 N008 C00L C00I 169.4(3) 6_556 . . . ?
 Y001 N008 C00N C00M -170.7(4) 6_556 . . . ?
 Y001 O009 N00B O00A 11.8(4) . . . . ?
 Y001 O009 N00B O00C -165.2(4) . . . . ?
 Y001 O00A N00B O009 -12.0(4) . . . . ?
 Y001 O00A N00B O00C 165.1(4) . . . . ?
 O002 C00F C00G O004 -3.9(5) . . . . ?
 O002 C00F C00G C00J 172.7(4) . . . . ?
 O003 C00D C00H C00I 10.9(6) . . . . ?
 O003 C00D C00H C00M -166.4(4) . . . . ?
 O004 C00G C00J C00P 178.5(4) . . . . ?
 N006 N007 C00D O003 2.5(6) . . . . ?
 N006 N007 C00D C00H -176.2(3) . . . . ?
 N007 N006 C00K C00E 179.1(4) . . . . ?
 N007 C00D C00H C00I -170.3(4) . . . . ?
 N007 C00D C00H C00M 12.4(6) . . . . ?
 C00D C00H C00I C00L -177.5(4) . . . . ?
 C00D C00H C00M C00N 176.0(4) . . . . ?
 C00E C00F C00G O004 179.0(4) . . . . ?
 C00E C00F C00G C00J -4.4(6) . . . . ?
 C00E C00O C00P C00J -0.8(7) . . . . ?
 C00F C00E C00K N006 9.5(7) . . . . ?
 C00F C00E C00O C00P -1.6(7) . . . . ?
 C00F C00G C00J C00P 2.1(7) . . . . ?
 C00G C00J C00P C00O 0.5(7) . . . . ?
 C00H C00I C00L N008 1.6(7) . . . . ?
 C00H C00M C00N N008 1.3(7) . . . . ?
 C00I C00H C00M C00N -1.4(7) . . . . ?
 C00K N006 N007 C00D 179.7(4) . . . . ?
 C00K C00E C00F O002 7.3(7) . . . . ?
 C00K C00E C00F C00G -175.8(4) . . . . ?
 C00K C00E C00O C00P 178.3(4) . . . . ?
 C00L N008 C00N C00M 0.2(7) . . . . ?
 C00M C00H C00I C00L 0.0(6) . . . . ?
 C00N N008 C00L C00I -1.7(6) . . . . ?
 C00O C00E C00F O002 -172.9(4) . . . . ?
 C00O C00E C00F C00G 4.0(6) . . . . ?
 C00O C00E C00K N006 -170.4(4) . . . . ?
 C00Q O004 C00G C00F -161.5(4) . . . . ?
 C00Q O004 C00G C00J 21.8(6) . . . . ?
 C0AA_b C1A_b O0_b Y001 105.7(16) . . . . ?

_olex2_submission_special_instructions 'No special instructions were received'

data_el508b
_audit_creation_date              2015-10-08
_audit_creation_method
;
Olex2 1.2
(compiled 2015.09.30 svn.r3233 for OlexSys, GUI svn.r5103)
;
_shelxl_version_number            2014-1
_publ_contact_author_address      ?
_publ_contact_author_email        ?
_publ_contact_author_name         ''
_publ_contact_author_phone        ?
_publ_section_references
;
Dolomanov, O.V., Bourhis, L.J., Gildea, R.J, Howard, J.A.K. & Puschmann, H.
 (2009), J. Appl. Cryst. 42, 339-341.

Sheldrick, G.M. (2015). Acta Cryst. C71, 3-8.
;
_chemical_name_common             ?
_chemical_name_systematic
;
 ?
;
_chemical_formula_moiety          'C42 H36 Cl2 Dy2 N9 O9, Cl'
_chemical_formula_sum             'C42 H36 Cl3 Dy2 N9 O9'
_chemical_formula_weight          1242.15
_chemical_melting_point           ?
_chemical_oxdiff_formula          D2C60H60O4N10
loop_
  _atom_type_symbol
  _atom_type_description
  _atom_type_scat_dispersion_real
  _atom_type_scat_dispersion_imag
  _atom_type_scat_source
 'C' 'C' 0.0033 0.0016 'International Tables Vol C Tables 4.2.6.8 and 6.1.1.4'
 'H' 'H' 0.0000 0.0000 'International Tables Vol C Tables 4.2.6.8 and 6.1.1.4'
 'Cl' 'Cl' 0.1484 0.1585 'International Tables Vol C Tables 4.2.6.8 and 6.1.1.4'
 'Dy' 'Dy' -0.1892 4.4098
 'International Tables Vol C Tables 4.2.6.8 and 6.1.1.4'
 'N' 'N' 0.0061 0.0033 'International Tables Vol C Tables 4.2.6.8 and 6.1.1.4'
 'O' 'O' 0.0106 0.0060 'International Tables Vol C Tables 4.2.6.8 and 6.1.1.4'

_shelx_space_group_comment
;
The symmetry employed for this shelxl refinement is uniquely defined
by the following loop, which should always be used as a source of
symmetry information in preference to the above space-group names.
They are only intended as comments.
;
_space_group_crystal_system       'monoclinic'
_space_group_IT_number            14
_space_group_name_H-M_alt         'P 1 21/n 1'
_space_group_name_Hall            '-P 2yn'
loop_
  _space_group_symop_operation_xyz
 'x, y, z'
 '-x+1/2, y+1/2, -z+1/2'
 '-x, -y, -z'
 'x-1/2, -y-1/2, z-1/2'

_cell_length_a                    14.2871(3)
_cell_length_b                    19.9839(6)
_cell_length_c                    20.0637(7)
_cell_angle_alpha                 90
_cell_angle_beta                  101.857(3)
_cell_angle_gamma                 90
_cell_volume                      5606.2(3)
_cell_formula_units_Z             4
_cell_measurement_reflns_used     8597
_cell_measurement_temperature     173
_cell_measurement_theta_max       28.8140
_cell_measurement_theta_min       3.6020
_shelx_estimated_absorpt_T_max    ?
_shelx_estimated_absorpt_T_min    ?
_exptl_absorpt_coefficient_mu     2.840
_exptl_absorpt_correction_T_max   1.00000
_exptl_absorpt_correction_T_min   0.67374
_exptl_absorpt_correction_type    multi-scan
_exptl_absorpt_process_details
;
CrysAlisPro, Agilent Technologies,
Version 1.171.37.34i (release 04-08-2014 CrysAlis171 .NET)
(compiled Aug  4 2014,14:34:23)
Empirical absorption correction using spherical harmonics,
 implemented in SCALE3 ABSPACK scaling algorithm.
;
_exptl_crystal_colour             colourless
_exptl_crystal_colour_primary     colourless
_exptl_crystal_density_diffrn     1.472
_exptl_crystal_density_meas       ?
_exptl_crystal_density_method     ?
_exptl_crystal_description        block
_exptl_crystal_F_000              2424
_exptl_crystal_size_max           0.15
_exptl_crystal_size_mid           0.1
_exptl_crystal_size_min           0.08
_exptl_special_details
;
 ?
;
_exptl_transmission_factor_max    ?
_exptl_transmission_factor_min    ?
_diffrn_reflns_av_R_equivalents   0.0304
_diffrn_reflns_av_unetI/netI      0.0526
_diffrn_reflns_Laue_measured_fraction_full 0.976
_diffrn_reflns_Laue_measured_fraction_max 0.975
_diffrn_reflns_limit_h_max        19
_diffrn_reflns_limit_h_min        -17
_diffrn_reflns_limit_k_max        27
_diffrn_reflns_limit_k_min        -23
_diffrn_reflns_limit_l_max        26
_diffrn_reflns_limit_l_min        -17
_diffrn_reflns_number             23213
_diffrn_reflns_point_group_measured_fraction_full 0.976
_diffrn_reflns_point_group_measured_fraction_max 0.975
_diffrn_reflns_theta_full         26.000
_diffrn_reflns_theta_max          26.371
_diffrn_reflns_theta_min          3.721
_diffrn_ambient_temperature       173
_diffrn_detector                  'CCD plate'
_diffrn_detector_area_resol_mean  16.1033
_diffrn_detector_type             Eos
_diffrn_measured_fraction_theta_full 0.976
_diffrn_measured_fraction_theta_max 0.975
_diffrn_measurement_details
;
#__ type_ start__ end____ width___ exp.time_
  1 omega  -89.00  -32.00   1.0000   30.0000
omega____ theta____ kappa____ phi______ frames
    -      -15.9733  178.0000 -120.0000 57

#__ type_ start__ end____ width___ exp.time_
  2 omega  -31.00   48.00   1.0000   30.0000
omega____ theta____ kappa____ phi______ frames
    -      -15.9733   57.0000  150.0000 79

#__ type_ start__ end____ width___ exp.time_
  3 omega   -1.00   56.00   1.0000   30.0000
omega____ theta____ kappa____ phi______ frames
    -       16.7545  -99.0000 -120.0000 57
;
_diffrn_measurement_device        'four-circle diffractometer'
_diffrn_measurement_device_type   'Xcalibur, Eos, Gemini ultra'
_diffrn_measurement_method        '\w scans'
_diffrn_orient_matrix_UB_11       -0.0018170000
_diffrn_orient_matrix_UB_12       0.0338292000
_diffrn_orient_matrix_UB_13       -0.0108921000
_diffrn_orient_matrix_UB_21       -0.0446495000
_diffrn_orient_matrix_UB_22       0.0039433000
_diffrn_orient_matrix_UB_23       0.0097817000
_diffrn_orient_matrix_UB_31       0.0240130000
_diffrn_orient_matrix_UB_32       0.0099747000
_diffrn_orient_matrix_UB_33       0.0330259000
_diffrn_radiation_monochromator   graphite
_diffrn_radiation_probe           x-ray
_diffrn_radiation_type            MoK\a
_diffrn_radiation_wavelength      0.71073
_diffrn_source                    'Enhance (Mo) X-ray Source'
_reflns_Friedel_coverage          0.000
_reflns_Friedel_fraction_full     .
_reflns_Friedel_fraction_max      .
_reflns_number_gt                 9122
_reflns_number_total              11177
_reflns_odcompleteness_completeness 98.70
_reflns_odcompleteness_iscentric  1
_reflns_odcompleteness_theta      26.32
_reflns_special_details
;
 Data were apparently pre-merged, so _diffrn_reflns_number
 etc. will have to be added later.
 
 Reflections were merged by SHELXL according to the crystal
 class for the calculation of statistics and refinement.
 
 _reflns_Friedel_fraction is defined as the number of unique
 Friedel pairs measured divided by the number that would be
 possible theoretically, ignoring centric projections and
 systematic absences.
;
_reflns_threshold_expression      'I > 2\s(I)'
_computing_cell_refinement
;
CrysAlisPro, Agilent Technologies,
Version 1.171.37.34i (release 04-08-2014 CrysAlis171 .NET)
(compiled Aug  4 2014,14:34:23)
;
_computing_data_collection
;
CrysAlisPro, Agilent Technologies,
Version 1.171.37.34i (release 04-08-2014 CrysAlis171 .NET)
(compiled Aug  4 2014,14:34:23)
;
_computing_data_reduction
;
CrysAlisPro, Agilent Technologies,
Version 1.171.37.34i (release 04-08-2014 CrysAlis171 .NET)
(compiled Aug  4 2014,14:34:23)
;
_computing_molecular_graphics     'Olex2 (Dolomanov et al., 2009)'
_computing_publication_material   'Olex2 (Dolomanov et al., 2009)'
_computing_structure_refinement   'ShelXL (Sheldrick, 2015)'
_computing_structure_solution     'ShelXS (Sheldrick, 2008)'
_refine_diff_density_max          1.359
_refine_diff_density_min          -1.146
_refine_diff_density_rms          0.140
_refine_ls_extinction_coef        .
_refine_ls_extinction_method      none
_refine_ls_goodness_of_fit_ref    1.077
_refine_ls_hydrogen_treatment     constr
_refine_ls_matrix_type            full
_refine_ls_number_parameters      589
_refine_ls_number_reflns          11177
_refine_ls_number_restraints      0
_refine_ls_R_factor_all           0.0562
_refine_ls_R_factor_gt            0.0452
_refine_ls_restrained_S_all       1.077
_refine_ls_shift/su_max           0.001
_refine_ls_shift/su_mean          0.000
_refine_ls_structure_factor_coef  Fsqd
_refine_ls_weighting_details
'w=1/[\s^2^(Fo^2^)+(0.0616P)^2^+6.8047P] where P=(Fo^2^+2Fc^2^)/3'
_refine_ls_weighting_scheme       calc
_refine_ls_wR_factor_gt           0.1161
_refine_ls_wR_factor_ref          0.1221
_refine_special_details
;
 ?
;
_olex2_refinement_description
;
1. Fixed Uiso
 At 1.2 times of:
  All C(H) groups, All N(H) groups
 At 1.5 times of:
  All C(H,H,H) groups
2.a Aromatic/amide H refined with riding coordinates:
 N8(H8), N5(H5), N2(H2), C12(H12), C36(H36), C22(H22), C8(H8A), C13(H13),
 C14(H14), C31(H31), C33(H33), C11(H11), C3(H3), C32(H32), C19(H19), C25(H25),
 C26(H26), C17(H17), C4(H4), C5(H5A), C18(H18), C42(H42), C41(H41), C39(H39),
 C28(H28), C27(H27), C40(H40)
2.b Idealised Me refined as rotating group:
 C1(H1A,H1B,H1C), C29(H29A,H29B,H29C), C15(H15A,H15B,H15C)
;
_atom_sites_solution_hydrogens    geom
_atom_sites_solution_primary      ?
_atom_sites_solution_secondary    ?
loop_
  _atom_site_label
  _atom_site_type_symbol
  _atom_site_fract_x
  _atom_site_fract_y
  _atom_site_fract_z
  _atom_site_U_iso_or_equiv
  _atom_site_adp_type
  _atom_site_occupancy
  _atom_site_site_symmetry_order
  _atom_site_calc_flag
  _atom_site_refinement_flags_posn
  _atom_site_refinement_flags_adp
  _atom_site_refinement_flags_occupancy
  _atom_site_disorder_assembly
  _atom_site_disorder_group
 Dy1 Dy 0.55418(2) 0.35149(2) 0.27570(2) 0.02443(9) Uani 1 1 d . . . . .
 Dy2 Dy 0.36334(2) 0.24326(2) 0.29007(2) 0.02584(9) Uani 1 1 d . . . . .
 Cl3 Cl 0.99227(17) 0.44481(16) 0.37523(16) 0.0907(8) Uani 1 1 d . . . . .
 O2 O 0.5270(3) 0.25636(19) 0.3420(2) 0.0301(9) Uani 1 1 d . . . . .
 O5 O 0.4068(2) 0.35443(18) 0.3086(2) 0.0278(8) Uani 1 1 d . . . . .
 O8 O 0.4483(2) 0.28191(19) 0.2087(2) 0.0279(8) Uani 1 1 d . . . . .
 O9 O 0.4148(3) 0.1540(2) 0.2140(2) 0.0352(9) Uani 1 1 d . . . . .
 O7 O 0.6613(2) 0.4325(2) 0.2619(2) 0.0298(9) Uani 1 1 d . . . . .
 O3 O 0.6830(2) 0.3291(2) 0.3799(2) 0.0351(10) Uani 1 1 d . . . . .
 O6 O 0.5365(3) 0.4372(2) 0.3679(2) 0.0309(9) Uani 1 1 d . . . . .
 O4 O 0.2464(3) 0.2341(2) 0.1825(2) 0.0366(10) Uani 1 1 d . . . . .
 Cl2 Cl 0.6629(3) 0.2726(3) 0.2478(3) 0.1439(15) Uani 1 1 d . . . . .
 O1 O 0.2472(3) 0.1613(2) 0.2969(2) 0.0363(10) Uani 1 1 d . . . . .
 Cl1 Cl 0.3224(3) 0.2674(2) 0.3960(2) 0.1370(14) Uani 1 1 d . . . . .
 N7 N 0.5696(3) 0.3719(2) 0.1559(3) 0.0296(10) Uani 1 1 d . . . . .
 N3 N 0.0535(3) -0.0458(3) 0.2831(2) 0.0292(10) Uani 1 1 d . . . . .
 N1 N 0.4168(3) 0.1461(2) 0.3720(3) 0.0341(12) Uani 1 1 d . . . . .
 N4 N 0.2211(3) 0.3222(3) 0.2693(3) 0.0337(11) Uani 1 1 d . . . . .
 N8 N 0.6191(3) 0.4308(3) 0.1462(3) 0.0342(11) Uani 1 1 d . . . . .
 H8 H 0.6204 0.4481 0.1061 0.041 Uiso 1 1 calc R . . . .
 N5 N 0.1428(3) 0.2985(3) 0.2229(3) 0.0365(12) Uani 1 1 d . . . . .
 H5 H 0.0839 0.3114 0.2229 0.044 Uiso 1 1 calc R . . . .
 N2 N 0.3470(3) 0.0980(3) 0.3711(3) 0.0367(12) Uani 1 1 d . . . . .
 H2 H 0.3578 0.0617 0.3964 0.044 Uiso 1 1 calc R . . . .
 C21 C 0.3777(4) 0.4033(3) 0.3427(3) 0.0270(11) Uani 1 1 d . . . . .
 C35 C 0.4600(4) 0.2455(3) 0.1556(3) 0.0282(12) Uani 1 1 d . . . . .
 C34 C 0.4966(4) 0.2716(3) 0.1004(3) 0.0307(13) Uani 1 1 d . . . . .
 C7 C 0.5898(4) 0.2349(3) 0.3948(3) 0.0305(13) Uani 1 1 d . . . . .
 C30 C 0.4377(4) 0.1769(3) 0.1538(3) 0.0281(12) Uani 1 1 d . . . . .
 C12 C 0.1408(4) -0.0599(3) 0.3190(3) 0.0295(12) Uani 1 1 d . . . . .
 H12 H 0.1555 -0.1052 0.3313 0.035 Uiso 1 1 calc R . . . .
 C36 C 0.5402(4) 0.3377(3) 0.1004(3) 0.0325(13) Uani 1 1 d . . . . .
 H36 H 0.5474 0.3564 0.0583 0.039 Uiso 1 1 calc R . . . .
 C23 C 0.1636(4) 0.2545(3) 0.1781(3) 0.0337(14) Uani 1 1 d . . . . .
 C2 C 0.6752(4) 0.2721(3) 0.4176(3) 0.0274(12) Uani 1 1 d . . . . .
 C20 C 0.2802(4) 0.4137(3) 0.3451(3) 0.0285(12) Uani 1 1 d . . . . .
 C22 C 0.2038(4) 0.3761(3) 0.3021(3) 0.0367(14) Uani 1 1 d . . . . .
 H22 H 0.1396 0.3909 0.2976 0.044 Uiso 1 1 calc R . . . .
 C6 C 0.5771(4) 0.1779(3) 0.4340(3) 0.0360(14) Uani 1 1 d . . . . .
 C9 C 0.2630(4) 0.1093(3) 0.3303(3) 0.0364(14) Uani 1 1 d . . . . .
 C16 C 0.4438(4) 0.4496(3) 0.3764(3) 0.0313(12) Uani 1 1 d . . . . .
 C37 C 0.6634(4) 0.4573(3) 0.2046(3) 0.0304(12) Uani 1 1 d . . . . .
 C8 C 0.4923(4) 0.1365(3) 0.4191(3) 0.0379(15) Uani 1 1 d . . . . .
 H8A H 0.4920 0.0981 0.4469 0.045 Uiso 1 1 calc R . . . .
 C13 C 0.0342(4) 0.0183(3) 0.2673(3) 0.0332(13) Uani 1 1 d . . . . .
 H13 H -0.0285 0.0293 0.2435 0.040 Uiso 1 1 calc R . . . .
 C14 C 0.1000(4) 0.0698(3) 0.2834(3) 0.0341(13) Uani 1 1 d . . . . .
 H14 H 0.0832 0.1146 0.2704 0.041 Uiso 1 1 calc R . . . .
 C31 C 0.4417(4) 0.1375(3) 0.0985(3) 0.0338(14) Uani 1 1 d . . . . .
 H31 H 0.4239 0.0917 0.0984 0.041 Uiso 1 1 calc R . . . .
 C10 C 0.1910(4) 0.0541(3) 0.3191(3) 0.0302(12) Uani 1 1 d . . . . .
 C33 C 0.4999(4) 0.2310(4) 0.0448(3) 0.0388(15) Uani 1 1 d . . . . .
 H33 H 0.5221 0.2491 0.0071 0.047 Uiso 1 1 calc R . . . .
 C1 C 0.7798(4) 0.3553(4) 0.3854(4) 0.052(2) Uani 1 1 d . . . . .
 H1A H 0.8215 0.3197 0.3746 0.078 Uiso 1 1 calc GR . . . .
 H1B H 0.8042 0.3712 0.4319 0.078 Uiso 1 1 calc GR . . . .
 H1C H 0.7786 0.3924 0.3533 0.078 Uiso 1 1 calc GR . . . .
 C29 C 0.4006(6) 0.0834(3) 0.2191(5) 0.059(2) Uani 1 1 d . . . . .
 H29A H 0.3931 0.0723 0.2653 0.088 Uiso 1 1 calc GR . . . .
 H29B H 0.4560 0.0595 0.2091 0.088 Uiso 1 1 calc GR . . . .
 H29C H 0.3429 0.0700 0.1863 0.088 Uiso 1 1 calc GR . . . .
 C11 C 0.2111(4) -0.0120(3) 0.3393(3) 0.0357(14) Uani 1 1 d . . . . .
 H11 H 0.2714 -0.0240 0.3664 0.043 Uiso 1 1 calc R . . . .
 C3 C 0.7440(4) 0.2516(3) 0.4720(3) 0.0386(15) Uani 1 1 d . . . . .
 H3 H 0.8007 0.2773 0.4853 0.046 Uiso 1 1 calc R . . . .
 C32 C 0.4715(4) 0.1645(3) 0.0431(3) 0.0398(16) Uani 1 1 d . . . . .
 H32 H 0.4727 0.1378 0.0041 0.048 Uiso 1 1 calc R . . . .
 C19 C 0.2541(5) 0.4662(3) 0.3831(3) 0.0377(14) Uani 1 1 d . . . . .
 H19 H 0.1891 0.4722 0.3859 0.045 Uiso 1 1 calc R . . . .
 C25 C 0.1036(5) 0.1865(3) 0.0760(3) 0.0397(15) Uani 1 1 d . . . . .
 H25 H 0.1651 0.1664 0.0817 0.048 Uiso 1 1 calc R . . . .
 C38 C 0.7162(4) 0.5210(3) 0.2021(3) 0.0358(14) Uani 1 1 d . . . . .
 C15 C 0.6089(5) 0.4850(4) 0.3978(4) 0.0512(19) Uani 1 1 d . . . . .
 H15A H 0.6694 0.4739 0.3846 0.077 Uiso 1 1 calc GR . . . .
 H15B H 0.6176 0.4836 0.4475 0.077 Uiso 1 1 calc GR . . . .
 H15C H 0.5887 0.5301 0.3815 0.077 Uiso 1 1 calc GR . . . .
 N6 N -0.0544(5) 0.1960(5) 0.0101(3) 0.082(3) Uani 1 1 d . . . . .
 C26 C 0.0318(5) 0.1693(4) 0.0211(3) 0.0454(16) Uani 1 1 d . . . . .
 H26 H 0.0453 0.1367 -0.0100 0.054 Uiso 1 1 calc R . . . .
 C17 C 0.4170(5) 0.5019(3) 0.4124(3) 0.0407(15) Uani 1 1 d . . . . .
 H17 H 0.4636 0.5329 0.4344 0.049 Uiso 1 1 calc R . . . .
 C4 C 0.7320(4) 0.1937(3) 0.5080(4) 0.0419(15) Uani 1 1 d . . . . .
 H4 H 0.7805 0.1793 0.5450 0.050 Uiso 1 1 calc R . . . .
 C5 C 0.6480(4) 0.1573(3) 0.4890(3) 0.0423(16) Uani 1 1 d . . . . .
 H5A H 0.6386 0.1181 0.5136 0.051 Uiso 1 1 calc R . . . .
 C24 C 0.0849(4) 0.2327(4) 0.1218(4) 0.0480(18) Uani 1 1 d . . . . .
 N9 N 0.8050(6) 0.6440(4) 0.2108(4) 0.072(2) Uani 1 1 d . . . . .
 C18 C 0.3234(5) 0.5094(3) 0.4167(4) 0.0440(16) Uani 1 1 d . . . . .
 H18 H 0.3057 0.5449 0.4431 0.053 Uiso 1 1 calc R . . . .
 C42 C 0.7865(5) 0.5378(4) 0.2562(5) 0.067(2) Uani 1 1 d . . . . .
 H42 H 0.8076 0.5065 0.2917 0.080 Uiso 1 1 calc R . . . .
 C41 C 0.8275(6) 0.6016(4) 0.2590(6) 0.071(3) Uani 1 1 d . . . . .
 H41 H 0.8738 0.6138 0.2982 0.085 Uiso 1 1 calc R . . . .
 C39 C 0.6924(9) 0.5654(5) 0.1520(5) 0.097(4) Uani 1 1 d . . . . .
 H39 H 0.6443 0.5551 0.1132 0.116 Uiso 1 1 calc R . . . .
 C28 C -0.0047(6) 0.2653(8) 0.1095(6) 0.112(5) Uani 1 1 d . . . . .
 H28 H -0.0184 0.3023 0.1355 0.135 Uiso 1 1 calc R . . . .
 C27 C -0.0706(6) 0.2385(10) 0.0562(6) 0.160(9) Uani 1 1 d . . . . .
 H27 H -0.1350 0.2524 0.0525 0.192 Uiso 1 1 calc R . . . .
 C40 C 0.7380(13) 0.6263(6) 0.1570(5) 0.137(7) Uani 1 1 d . . . . .
 H40 H 0.7211 0.6572 0.1205 0.165 Uiso 1 1 calc R . . . .

loop_
  _atom_site_aniso_label
  _atom_site_aniso_U_11
  _atom_site_aniso_U_22
  _atom_site_aniso_U_33
  _atom_site_aniso_U_23
  _atom_site_aniso_U_13
  _atom_site_aniso_U_12
 Dy1 0.01900(13) 0.01500(14) 0.03738(15) -0.00196(10) 0.00136(10) -0.00117(9)
 Dy2 0.01931(13) 0.01724(14) 0.03842(16) -0.00098(11) -0.00005(11) -0.00327(9)
 Cl3 0.0687(13) 0.092(2) 0.114(2) 0.0150(17) 0.0268(14) -0.0037(13)
 O2 0.0204(18) 0.022(2) 0.043(2) 0.0062(17) -0.0044(17) -0.0033(15)
 O5 0.0227(17) 0.0168(19) 0.044(2) -0.0066(17) 0.0073(16) -0.0014(15)
 O8 0.0239(17) 0.0145(19) 0.043(2) -0.0073(17) 0.0018(16) -0.0028(15)
 O9 0.035(2) 0.019(2) 0.051(3) -0.0017(19) 0.0100(19) -0.0021(17)
 O7 0.0245(18) 0.021(2) 0.041(2) 0.0022(18) 0.0006(16) -0.0050(15)
 O3 0.0180(17) 0.028(2) 0.055(3) 0.005(2) -0.0029(17) -0.0060(16)
 O6 0.0271(18) 0.022(2) 0.042(2) -0.0067(18) 0.0043(16) -0.0042(16)
 O4 0.025(2) 0.036(2) 0.047(2) -0.001(2) 0.0021(18) -0.0008(17)
 Cl2 0.126(3) 0.144(4) 0.159(4) -0.006(3) 0.024(3) 0.016(3)
 O1 0.0210(18) 0.024(2) 0.058(3) 0.006(2) -0.0046(18) -0.0093(16)
 Cl1 0.144(3) 0.128(3) 0.138(3) 0.006(3) 0.028(3) -0.001(3)
 N7 0.024(2) 0.018(2) 0.046(3) -0.003(2) 0.005(2) -0.0017(19)
 N3 0.023(2) 0.025(3) 0.040(3) 0.003(2) 0.0075(19) -0.0044(18)
 N1 0.025(2) 0.019(2) 0.053(3) 0.001(2) -0.004(2) -0.0079(19)
 N4 0.019(2) 0.040(3) 0.041(3) -0.005(2) 0.002(2) -0.003(2)
 N8 0.039(3) 0.029(3) 0.034(3) 0.003(2) 0.006(2) -0.004(2)
 N5 0.019(2) 0.046(3) 0.041(3) -0.006(3) -0.002(2) 0.005(2)
 N2 0.031(2) 0.026(3) 0.046(3) 0.009(2) -0.009(2) -0.013(2)
 C21 0.032(3) 0.022(3) 0.029(3) 0.004(2) 0.008(2) 0.000(2)
 C35 0.017(2) 0.023(3) 0.041(3) -0.001(2) -0.002(2) 0.003(2)
 C34 0.020(2) 0.025(3) 0.044(3) -0.005(3) 0.001(2) 0.000(2)
 C7 0.020(2) 0.023(3) 0.044(3) 0.003(3) -0.004(2) -0.003(2)
 C30 0.020(2) 0.020(3) 0.043(3) -0.005(2) 0.002(2) 0.004(2)
 C12 0.032(3) 0.019(3) 0.038(3) 0.005(2) 0.006(2) -0.005(2)
 C36 0.028(3) 0.033(3) 0.035(3) 0.003(3) 0.005(2) 0.003(2)
 C23 0.025(3) 0.042(4) 0.032(3) 0.007(3) 0.001(2) -0.004(2)
 C2 0.024(2) 0.015(3) 0.040(3) -0.001(2) 0.000(2) 0.000(2)
 C20 0.025(2) 0.022(3) 0.037(3) 0.005(2) 0.002(2) 0.003(2)
 C22 0.031(3) 0.035(4) 0.042(3) 0.000(3) 0.004(3) 0.011(3)
 C6 0.025(3) 0.026(3) 0.054(4) 0.006(3) 0.000(3) -0.002(2)
 C9 0.030(3) 0.033(3) 0.042(3) 0.001(3) -0.002(3) -0.010(3)
 C16 0.030(3) 0.029(3) 0.034(3) -0.001(3) 0.004(2) -0.002(2)
 C37 0.026(3) 0.019(3) 0.048(3) -0.002(3) 0.011(2) -0.001(2)
 C8 0.032(3) 0.018(3) 0.056(4) 0.013(3) -0.008(3) -0.008(2)
 C13 0.025(3) 0.023(3) 0.050(4) 0.005(3) 0.003(2) -0.005(2)
 C14 0.031(3) 0.023(3) 0.047(3) 0.000(3) 0.004(3) -0.004(2)
 C31 0.028(3) 0.025(3) 0.044(3) -0.013(3) -0.003(3) -0.003(2)
 C10 0.030(3) 0.028(3) 0.034(3) -0.001(2) 0.009(2) -0.006(2)
 C33 0.030(3) 0.046(4) 0.037(3) -0.002(3) -0.002(3) 0.006(3)
 C1 0.023(3) 0.055(5) 0.068(5) 0.012(4) -0.014(3) -0.014(3)
 C29 0.084(5) 0.019(3) 0.079(5) -0.008(4) 0.031(4) -0.012(4)
 C11 0.030(3) 0.026(3) 0.047(3) 0.000(3) -0.004(3) -0.005(2)
 C3 0.026(3) 0.037(4) 0.047(4) -0.003(3) -0.005(3) -0.009(2)
 C32 0.032(3) 0.034(4) 0.049(4) -0.023(3) -0.004(3) 0.007(3)
 C19 0.042(3) 0.033(3) 0.041(3) 0.003(3) 0.017(3) 0.010(3)
 C25 0.041(3) 0.022(3) 0.051(4) -0.001(3) -0.001(3) 0.004(3)
 C38 0.041(3) 0.017(3) 0.053(4) -0.003(3) 0.020(3) -0.007(2)
 C15 0.041(3) 0.057(5) 0.054(4) -0.027(4) 0.005(3) -0.020(3)
 N6 0.047(4) 0.141(8) 0.049(4) -0.034(5) -0.012(3) -0.007(4)
 C26 0.055(4) 0.037(4) 0.039(3) 0.003(3) -0.004(3) 0.002(3)
 C17 0.049(4) 0.033(4) 0.042(3) -0.015(3) 0.012(3) 0.001(3)
 C4 0.033(3) 0.036(4) 0.051(4) 0.008(3) -0.005(3) -0.007(3)
 C5 0.033(3) 0.034(4) 0.051(4) 0.009(3) -0.011(3) -0.004(3)
 C24 0.030(3) 0.071(5) 0.040(4) -0.006(4) -0.001(3) -0.007(3)
 N9 0.099(5) 0.037(4) 0.088(5) -0.007(4) 0.039(5) -0.041(4)
 C18 0.047(4) 0.032(4) 0.052(4) -0.015(3) 0.006(3) -0.001(3)
 C42 0.044(4) 0.037(4) 0.105(7) 0.019(4) -0.016(4) -0.013(3)
 C41 0.055(4) 0.038(4) 0.111(7) -0.004(5) -0.004(5) -0.025(4)
 C39 0.154(10) 0.071(7) 0.058(5) 0.005(5) 0.003(6) -0.073(7)
 C28 0.036(4) 0.204(15) 0.088(7) -0.068(8) -0.011(4) 0.020(6)
 C27 0.037(4) 0.32(2) 0.110(9) -0.140(12) -0.030(5) 0.045(8)
 C40 0.264(17) 0.060(7) 0.066(6) 0.021(5) -0.017(8) -0.103(9)

_geom_special_details
;
 All esds (except the esd in the dihedral angle between two l.s. planes)
 are estimated using the full covariance matrix.  The cell esds are taken
 into account individually in the estimation of esds in distances, angles
 and torsion angles; correlations between esds in cell parameters are only
 used when they are defined by crystal symmetry.  An approximate (isotropic)
 treatment of cell esds is used for estimating esds involving l.s. planes.
;
loop_
  _geom_bond_atom_site_label_1
  _geom_bond_atom_site_label_2
  _geom_bond_distance
  _geom_bond_site_symmetry_2
  _geom_bond_publ_flag
 Dy1 Dy2 3.5380(3) . ?
 Dy1 O2 2.397(4) . ?
 Dy1 O5 2.332(4) . ?
 Dy1 O8 2.278(3) . ?
 Dy1 O7 2.283(4) . ?
 Dy1 O3 2.525(4) . ?
 Dy1 O6 2.571(4) . ?
 Dy1 Cl2 2.360(5) . ?
 Dy1 N7 2.493(5) . ?
 Dy1 N3 2.687(5) 2 ?
 Dy2 O2 2.371(3) . ?
 Dy2 O5 2.316(4) . ?
 Dy2 O8 2.355(4) . ?
 Dy2 O9 2.551(4) . ?
 Dy2 O4 2.449(4) . ?
 Dy2 O1 2.356(4) . ?
 Dy2 Cl1 2.367(5) . ?
 Dy2 N1 2.556(5) . ?
 Dy2 N4 2.540(5) . ?
 O2 C7 1.312(7) . ?
 O5 C21 1.309(7) . ?
 O8 C35 1.329(7) . ?
 O9 C30 1.392(7) . ?
 O9 C29 1.434(8) . ?
 O7 C37 1.257(7) . ?
 O3 C2 1.385(7) . ?
 O3 C1 1.462(7) . ?
 O6 C16 1.392(7) . ?
 O6 C15 1.445(7) . ?
 O4 C23 1.236(7) . ?
 O1 C9 1.232(7) . ?
 N7 N8 1.407(7) . ?
 N7 C36 1.300(8) . ?
 N3 Dy1 2.688(5) 2_545 ?
 N3 C12 1.336(7) . ?
 N3 C13 1.336(8) . ?
 N1 N2 1.383(6) . ?
 N1 C8 1.295(7) . ?
 N4 N5 1.384(6) . ?
 N4 C22 1.311(8) . ?
 N8 H8 0.8800 . ?
 N8 C37 1.322(7) . ?
 N5 H5 0.8800 . ?
 N5 C23 1.334(8) . ?
 N2 H2 0.8800 . ?
 N2 C9 1.325(7) . ?
 C21 C20 1.419(7) . ?
 C21 C16 1.393(8) . ?
 C35 C34 1.419(9) . ?
 C35 C30 1.406(8) . ?
 C34 C36 1.460(8) . ?
 C34 C33 1.387(9) . ?
 C7 C2 1.420(7) . ?
 C7 C6 1.418(8) . ?
 C30 C31 1.370(8) . ?
 C12 H12 0.9500 . ?
 C12 C11 1.386(8) . ?
 C36 H36 0.9500 . ?
 C23 C24 1.487(8) . ?
 C2 C3 1.373(8) . ?
 C20 C22 1.455(8) . ?
 C20 C19 1.391(8) . ?
 C22 H22 0.9500 . ?
 C6 C8 1.446(8) . ?
 C6 C5 1.398(8) . ?
 C9 C10 1.494(8) . ?
 C16 C17 1.369(8) . ?
 C37 C38 1.486(8) . ?
 C8 H8A 0.9500 . ?
 C13 H13 0.9500 . ?
 C13 C14 1.386(8) . ?
 C14 H14 0.9500 . ?
 C14 C10 1.386(8) . ?
 C31 H31 0.9500 . ?
 C31 C32 1.381(10) . ?
 C10 C11 1.394(8) . ?
 C33 H33 0.9500 . ?
 C33 C32 1.387(10) . ?
 C1 H1A 0.9800 . ?
 C1 H1B 0.9800 . ?
 C1 H1C 0.9800 . ?
 C29 H29A 0.9800 . ?
 C29 H29B 0.9800 . ?
 C29 H29C 0.9800 . ?
 C11 H11 0.9500 . ?
 C3 H3 0.9500 . ?
 C3 C4 1.393(9) . ?
 C32 H32 0.9500 . ?
 C19 H19 0.9500 . ?
 C19 C18 1.380(9) . ?
 C25 H25 0.9500 . ?
 C25 C26 1.384(9) . ?
 C25 C24 1.368(10) . ?
 C38 C42 1.361(10) . ?
 C38 C39 1.332(12) . ?
 C15 H15A 0.9800 . ?
 C15 H15B 0.9800 . ?
 C15 H15C 0.9800 . ?
 N6 C26 1.319(10) . ?
 N6 C27 1.310(13) . ?
 C26 H26 0.9500 . ?
 C17 H17 0.9500 . ?
 C17 C18 1.367(9) . ?
 C4 H4 0.9500 . ?
 C4 C5 1.388(8) . ?
 C5 H5A 0.9500 . ?
 C24 C28 1.411(12) . ?
 N9 C41 1.277(12) . ?
 N9 C40 1.336(13) . ?
 C18 H18 0.9500 . ?
 C42 H42 0.9500 . ?
 C42 C41 1.399(11) . ?
 C41 H41 0.9500 . ?
 C39 H39 0.9500 . ?
 C39 C40 1.374(12) . ?
 C28 H28 0.9500 . ?
 C28 C27 1.379(13) . ?
 C27 H27 0.9500 . ?
 C40 H40 0.9500 . ?

loop_
  _geom_angle_atom_site_label_1
  _geom_angle_atom_site_label_2
  _geom_angle_atom_site_label_3
  _geom_angle
  _geom_angle_site_symmetry_1
  _geom_angle_site_symmetry_3
  _geom_angle_publ_flag
 O2 Dy1 Dy2 41.81(8) . . ?
 O2 Dy1 O3 64.77(12) . . ?
 O2 Dy1 O6 94.46(14) . . ?
 O2 Dy1 N7 136.18(15) . . ?
 O2 Dy1 N3 134.90(13) . 2 ?
 O5 Dy1 Dy2 40.27(9) . . ?
 O5 Dy1 O2 66.72(13) . . ?
 O5 Dy1 O3 108.46(14) . . ?
 O5 Dy1 O6 63.38(12) . . ?
 O5 Dy1 Cl2 139.46(16) . . ?
 O5 Dy1 N7 122.15(14) . . ?
 O5 Dy1 N3 68.69(14) . 2 ?
 O8 Dy1 Dy2 41.03(10) . . ?
 O8 Dy1 O2 71.31(14) . . ?
 O8 Dy1 O5 69.74(13) . . ?
 O8 Dy1 O7 137.85(14) . . ?
 O8 Dy1 O3 131.52(13) . . ?
 O8 Dy1 O6 132.79(12) . . ?
 O8 Dy1 Cl2 80.91(15) . . ?
 O8 Dy1 N7 73.18(15) . . ?
 O8 Dy1 N3 87.49(14) . 2 ?
 O7 Dy1 Dy2 171.98(9) . . ?
 O7 Dy1 O2 144.94(13) . . ?
 O7 Dy1 O5 133.06(13) . . ?
 O7 Dy1 O3 80.40(13) . . ?
 O7 Dy1 O6 77.44(13) . . ?
 O7 Dy1 Cl2 87.42(16) . . ?
 O7 Dy1 N7 64.71(14) . . ?
 O7 Dy1 N3 75.10(13) . 2 ?
 O3 Dy1 Dy2 105.49(9) . . ?
 O3 Dy1 O6 71.60(13) . . ?
 O3 Dy1 N3 138.81(14) . 2 ?
 O6 Dy1 Dy2 99.04(8) . . ?
 O6 Dy1 N3 71.08(13) . 2 ?
 Cl2 Dy1 Dy2 99.58(13) . . ?
 Cl2 Dy1 O2 77.93(16) . . ?
 Cl2 Dy1 O3 71.03(16) . . ?
 Cl2 Dy1 O6 141.46(14) . . ?
 Cl2 Dy1 N7 71.83(17) . . ?
 Cl2 Dy1 N3 138.71(16) . 2 ?
 N7 Dy1 Dy2 113.64(10) . . ?
 N7 Dy1 O3 129.35(14) . . ?
 N7 Dy1 O6 128.78(14) . . ?
 N7 Dy1 N3 66.88(14) . 2 ?
 N3 Dy1 Dy2 96.97(10) 2 . ?
 O2 Dy2 Dy1 42.37(9) . . ?
 O2 Dy2 O9 87.73(14) . . ?
 O2 Dy2 O4 145.89(15) . . ?
 O2 Dy2 N1 70.37(14) . . ?
 O2 Dy2 N4 133.43(15) . . ?
 O5 Dy2 Dy1 40.61(9) . . ?
 O5 Dy2 O2 67.41(13) . . ?
 O5 Dy2 O8 68.71(13) . . ?
 O5 Dy2 O9 131.71(13) . . ?
 O5 Dy2 O4 108.94(14) . . ?
 O5 Dy2 O1 145.75(14) . . ?
 O5 Dy2 Cl1 76.58(15) . . ?
 O5 Dy2 N1 126.19(14) . . ?
 O5 Dy2 N4 67.01(14) . . ?
 O8 Dy2 Dy1 39.42(9) . . ?
 O8 Dy2 O2 70.48(13) . . ?
 O8 Dy2 O9 64.01(13) . . ?
 O8 Dy2 O4 76.67(13) . . ?
 O8 Dy2 O1 137.57(14) . . ?
 O8 Dy2 Cl1 144.36(15) . . ?
 O8 Dy2 N1 124.47(15) . . ?
 O8 Dy2 N4 101.04(15) . . ?
 O9 Dy2 Dy1 93.26(9) . . ?
 O9 Dy2 N1 76.65(16) . . ?
 O4 Dy2 Dy1 111.80(10) . . ?
 O4 Dy2 O9 69.48(14) . . ?
 O4 Dy2 N1 124.71(15) . . ?
 O4 Dy2 N4 61.54(15) . . ?
 O1 Dy2 Dy1 173.56(11) . . ?
 O1 Dy2 O2 133.96(13) . . ?
 O1 Dy2 O9 80.92(15) . . ?
 O1 Dy2 O4 68.81(15) . . ?
 O1 Dy2 Cl1 77.44(16) . . ?
 O1 Dy2 N1 63.60(14) . . ?
 O1 Dy2 N4 83.81(15) . . ?
 Cl1 Dy2 Dy1 106.56(11) . . ?
 Cl1 Dy2 O2 89.22(16) . . ?
 Cl1 Dy2 O9 146.55(15) . . ?
 Cl1 Dy2 O4 123.82(15) . . ?
 Cl1 Dy2 N1 70.98(17) . . ?
 Cl1 Dy2 N4 71.55(16) . . ?
 N1 Dy2 Dy1 112.53(10) . . ?
 N4 Dy2 Dy1 102.18(12) . . ?
 N4 Dy2 O9 130.96(15) . . ?
 N4 Dy2 N1 134.49(17) . . ?
 Dy2 O2 Dy1 95.82(13) . . ?
 C7 O2 Dy1 123.0(3) . . ?
 C7 O2 Dy2 140.2(4) . . ?
 Dy2 O5 Dy1 99.12(14) . . ?
 C21 O5 Dy1 124.7(3) . . ?
 C21 O5 Dy2 134.1(3) . . ?
 Dy1 O8 Dy2 99.54(15) . . ?
 C35 O8 Dy1 129.0(3) . . ?
 C35 O8 Dy2 122.9(3) . . ?
 C30 O9 Dy2 116.0(3) . . ?
 C30 O9 C29 116.5(5) . . ?
 C29 O9 Dy2 125.7(4) . . ?
 C37 O7 Dy1 122.2(3) . . ?
 C2 O3 Dy1 118.1(3) . . ?
 C2 O3 C1 115.7(4) . . ?
 C1 O3 Dy1 121.1(4) . . ?
 C16 O6 Dy1 116.3(3) . . ?
 C16 O6 C15 116.7(5) . . ?
 C15 O6 Dy1 124.9(4) . . ?
 C23 O4 Dy2 120.5(4) . . ?
 C9 O1 Dy2 124.5(3) . . ?
 N8 N7 Dy1 114.6(3) . . ?
 C36 N7 Dy1 131.5(4) . . ?
 C36 N7 N8 114.0(5) . . ?
 C12 N3 Dy1 117.6(4) . 2_545 ?
 C13 N3 Dy1 123.8(4) . 2_545 ?
 C13 N3 C12 117.0(5) . . ?
 N2 N1 Dy2 113.6(3) . . ?
 C8 N1 Dy2 132.6(4) . . ?
 C8 N1 N2 113.4(5) . . ?
 N5 N4 Dy2 114.0(4) . . ?
 C22 N4 Dy2 130.9(4) . . ?
 C22 N4 N5 114.2(5) . . ?
 N7 N8 H8 124.0 . . ?
 C37 N8 N7 112.1(5) . . ?
 C37 N8 H8 124.0 . . ?
 N4 N5 H5 122.7 . . ?
 C23 N5 N4 114.7(5) . . ?
 C23 N5 H5 122.7 . . ?
 N1 N2 H2 121.7 . . ?
 C9 N2 N1 116.6(5) . . ?
 C9 N2 H2 121.7 . . ?
 O5 C21 C20 123.2(5) . . ?
 O5 C21 C16 119.5(5) . . ?
 C16 C21 C20 117.3(5) . . ?
 O8 C35 C34 123.5(5) . . ?
 O8 C35 C30 119.3(5) . . ?
 C30 C35 C34 117.2(5) . . ?
 C35 C34 C36 123.9(5) . . ?
 C33 C34 C35 119.4(6) . . ?
 C33 C34 C36 116.4(6) . . ?
 O2 C7 C2 119.3(5) . . ?
 O2 C7 C6 124.5(5) . . ?
 C6 C7 C2 116.2(5) . . ?
 O9 C30 C35 112.9(5) . . ?
 C31 C30 O9 124.8(5) . . ?
 C31 C30 C35 122.3(6) . . ?
 N3 C12 H12 118.2 . . ?
 N3 C12 C11 123.5(5) . . ?
 C11 C12 H12 118.2 . . ?
 N7 C36 C34 122.7(6) . . ?
 N7 C36 H36 118.7 . . ?
 C34 C36 H36 118.7 . . ?
 O4 C23 N5 120.8(5) . . ?
 O4 C23 C24 121.4(6) . . ?
 N5 C23 C24 117.8(5) . . ?
 O3 C2 C7 114.5(5) . . ?
 C3 C2 O3 123.7(5) . . ?
 C3 C2 C7 121.8(5) . . ?
 C21 C20 C22 121.7(5) . . ?
 C19 C20 C21 120.3(5) . . ?
 C19 C20 C22 117.5(5) . . ?
 N4 C22 C20 121.8(5) . . ?
 N4 C22 H22 119.1 . . ?
 C20 C22 H22 119.1 . . ?
 C7 C6 C8 122.9(5) . . ?
 C5 C6 C7 121.3(5) . . ?
 C5 C6 C8 115.8(6) . . ?
 O1 C9 N2 121.4(5) . . ?
 O1 C9 C10 119.9(5) . . ?
 N2 C9 C10 118.4(6) . . ?
 O6 C16 C21 112.9(5) . . ?
 C17 C16 O6 125.2(5) . . ?
 C17 C16 C21 121.8(5) . . ?
 O7 C37 N8 123.7(5) . . ?
 O7 C37 C38 118.5(5) . . ?
 N8 C37 C38 117.8(5) . . ?
 N1 C8 C6 127.1(6) . . ?
 N1 C8 H8A 116.5 . . ?
 C6 C8 H8A 116.5 . . ?
 N3 C13 H13 118.0 . . ?
 N3 C13 C14 124.0(5) . . ?
 C14 C13 H13 118.0 . . ?
 C13 C14 H14 120.9 . . ?
 C10 C14 C13 118.2(6) . . ?
 C10 C14 H14 120.9 . . ?
 C30 C31 H31 120.0 . . ?
 C30 C31 C32 119.9(6) . . ?
 C32 C31 H31 120.0 . . ?
 C14 C10 C9 117.0(5) . . ?
 C14 C10 C11 118.7(5) . . ?
 C11 C10 C9 124.2(5) . . ?
 C34 C33 H33 119.2 . . ?
 C32 C33 C34 121.5(7) . . ?
 C32 C33 H33 119.2 . . ?
 O3 C1 H1A 109.5 . . ?
 O3 C1 H1B 109.5 . . ?
 O3 C1 H1C 109.5 . . ?
 H1A C1 H1B 109.5 . . ?
 H1A C1 H1C 109.5 . . ?
 H1B C1 H1C 109.5 . . ?
 O9 C29 H29A 109.5 . . ?
 O9 C29 H29B 109.5 . . ?
 O9 C29 H29C 109.5 . . ?
 H29A C29 H29B 109.5 . . ?
 H29A C29 H29C 109.5 . . ?
 H29B C29 H29C 109.5 . . ?
 C12 C11 C10 118.4(5) . . ?
 C12 C11 H11 120.8 . . ?
 C10 C11 H11 120.8 . . ?
 C2 C3 H3 119.5 . . ?
 C2 C3 C4 121.0(5) . . ?
 C4 C3 H3 119.5 . . ?
 C31 C32 C33 119.4(6) . . ?
 C31 C32 H32 120.3 . . ?
 C33 C32 H32 120.3 . . ?
 C20 C19 H19 120.2 . . ?
 C18 C19 C20 119.6(6) . . ?
 C18 C19 H19 120.2 . . ?
 C26 C25 H25 120.5 . . ?
 C24 C25 H25 120.5 . . ?
 C24 C25 C26 119.1(6) . . ?
 C42 C38 C37 118.8(6) . . ?
 C39 C38 C37 123.0(7) . . ?
 C39 C38 C42 118.0(7) . . ?
 O6 C15 H15A 109.5 . . ?
 O6 C15 H15B 109.5 . . ?
 O6 C15 H15C 109.5 . . ?
 H15A C15 H15B 109.5 . . ?
 H15A C15 H15C 109.5 . . ?
 H15B C15 H15C 109.5 . . ?
 C27 N6 C26 115.9(6) . . ?
 C25 C26 H26 118.4 . . ?
 N6 C26 C25 123.2(7) . . ?
 N6 C26 H26 118.4 . . ?
 C16 C17 H17 120.0 . . ?
 C18 C17 C16 120.1(6) . . ?
 C18 C17 H17 120.0 . . ?
 C3 C4 H4 120.5 . . ?
 C5 C4 C3 119.0(6) . . ?
 C5 C4 H4 120.5 . . ?
 C6 C5 H5A 119.7 . . ?
 C4 C5 C6 120.5(6) . . ?
 C4 C5 H5A 119.7 . . ?
 C25 C24 C23 119.1(6) . . ?
 C25 C24 C28 119.3(7) . . ?
 C28 C24 C23 121.0(7) . . ?
 C41 N9 C40 117.6(7) . . ?
 C19 C18 H18 119.6 . . ?
 C17 C18 C19 120.9(6) . . ?
 C17 C18 H18 119.6 . . ?
 C38 C42 H42 120.3 . . ?
 C38 C42 C41 119.5(8) . . ?
 C41 C42 H42 120.3 . . ?
 N9 C41 C42 122.4(8) . . ?
 N9 C41 H41 118.8 . . ?
 C42 C41 H41 118.8 . . ?
 C38 C39 H39 120.3 . . ?
 C38 C39 C40 119.5(9) . . ?
 C40 C39 H39 120.3 . . ?
 C24 C28 H28 123.0 . . ?
 C27 C28 C24 114.0(10) . . ?
 C27 C28 H28 123.0 . . ?
 N6 C27 C28 127.4(8) . . ?
 N6 C27 H27 116.3 . . ?
 C28 C27 H27 116.3 . . ?
 N9 C40 C39 122.9(10) . . ?
 N9 C40 H40 118.5 . . ?
 C39 C40 H40 118.5 . . ?

loop_
  _geom_torsion_atom_site_label_1
  _geom_torsion_atom_site_label_2
  _geom_torsion_atom_site_label_3
  _geom_torsion_atom_site_label_4
  _geom_torsion
  _geom_torsion_site_symmetry_1
  _geom_torsion_site_symmetry_2
  _geom_torsion_site_symmetry_3
  _geom_torsion_site_symmetry_4
  _geom_torsion_publ_flag
 Dy1 O2 C7 C2 4.9(8) . . . . ?
 Dy1 O2 C7 C6 -178.3(5) . . . . ?
 Dy1 O5 C21 C20 161.1(4) . . . . ?
 Dy1 O5 C21 C16 -16.1(7) . . . . ?
 Dy1 O8 C35 C34 -49.7(7) . . . . ?
 Dy1 O8 C35 C30 128.5(4) . . . . ?
 Dy1 O7 C37 N8 -14.1(7) . . . . ?
 Dy1 O7 C37 C38 164.0(4) . . . . ?
 Dy1 O3 C2 C7 -4.4(6) . . . . ?
 Dy1 O3 C2 C3 174.7(5) . . . . ?
 Dy1 O6 C16 C21 12.3(6) . . . . ?
 Dy1 O6 C16 C17 -166.4(5) . . . . ?
 Dy1 N7 N8 C37 12.0(6) . . . . ?
 Dy1 N7 C36 C34 -6.5(8) . . . . ?
 Dy1 N3 C12 C11 165.4(5) 2_545 . . . ?
 Dy1 N3 C13 C14 -162.6(5) 2_545 . . . ?
 Dy2 O2 C7 C2 -160.8(4) . . . . ?
 Dy2 O2 C7 C6 16.0(10) . . . . ?
 Dy2 O5 C21 C20 -39.1(8) . . . . ?
 Dy2 O5 C21 C16 143.8(4) . . . . ?
 Dy2 O8 C35 C34 169.1(4) . . . . ?
 Dy2 O8 C35 C30 -12.7(6) . . . . ?
 Dy2 O9 C30 C35 20.5(5) . . . . ?
 Dy2 O9 C30 C31 -161.5(4) . . . . ?
 Dy2 O4 C23 N5 20.0(8) . . . . ?
 Dy2 O4 C23 C24 -162.1(5) . . . . ?
 Dy2 O1 C9 N2 6.6(9) . . . . ?
 Dy2 O1 C9 C10 -166.3(4) . . . . ?
 Dy2 N1 N2 C9 -1.7(7) . . . . ?
 Dy2 N1 C8 C6 -7.8(11) . . . . ?
 Dy2 N4 N5 C23 -25.3(6) . . . . ?
 Dy2 N4 C22 C20 21.3(9) . . . . ?
 O2 C7 C2 O3 0.0(8) . . . . ?
 O2 C7 C2 C3 -179.1(6) . . . . ?
 O2 C7 C6 C8 0.5(10) . . . . ?
 O2 C7 C6 C5 178.8(6) . . . . ?
 O5 C21 C20 C22 -8.5(9) . . . . ?
 O5 C21 C20 C19 179.2(5) . . . . ?
 O5 C21 C16 O6 0.8(7) . . . . ?
 O5 C21 C16 C17 179.5(6) . . . . ?
 O8 C35 C34 C36 10.5(8) . . . . ?
 O8 C35 C34 C33 -175.5(5) . . . . ?
 O8 C35 C30 O9 -6.6(7) . . . . ?
 O8 C35 C30 C31 175.4(5) . . . . ?
 O9 C30 C31 C32 -175.5(5) . . . . ?
 O7 C37 C38 C42 23.2(9) . . . . ?
 O7 C37 C38 C39 -150.6(9) . . . . ?
 O3 C2 C3 C4 179.9(6) . . . . ?
 O6 C16 C17 C18 179.3(6) . . . . ?
 O4 C23 C24 C25 3.6(10) . . . . ?
 O4 C23 C24 C28 -167.9(9) . . . . ?
 O1 C9 C10 C14 -14.9(9) . . . . ?
 O1 C9 C10 C11 161.9(6) . . . . ?
 N7 N8 C37 O7 0.0(8) . . . . ?
 N7 N8 C37 C38 -178.1(5) . . . . ?
 N3 C12 C11 C10 -2.5(9) . . . . ?
 N3 C13 C14 C10 -1.1(10) . . . . ?
 N1 N2 C9 O1 -2.8(10) . . . . ?
 N1 N2 C9 C10 170.2(5) . . . . ?
 N4 N5 C23 O4 5.0(9) . . . . ?
 N4 N5 C23 C24 -173.0(6) . . . . ?
 N8 N7 C36 C34 173.2(5) . . . . ?
 N8 C37 C38 C42 -158.5(7) . . . . ?
 N8 C37 C38 C39 27.6(11) . . . . ?
 N5 N4 C22 C20 -170.7(5) . . . . ?
 N5 C23 C24 C25 -178.5(6) . . . . ?
 N5 C23 C24 C28 10.1(12) . . . . ?
 N2 N1 C8 C6 -179.2(6) . . . . ?
 N2 C9 C10 C14 172.0(6) . . . . ?
 N2 C9 C10 C11 -11.2(10) . . . . ?
 C21 C20 C22 N4 13.7(9) . . . . ?
 C21 C20 C19 C18 2.2(9) . . . . ?
 C21 C16 C17 C18 0.7(10) . . . . ?
 C35 C34 C36 N7 16.6(8) . . . . ?
 C35 C34 C33 C32 -2.5(8) . . . . ?
 C35 C30 C31 C32 2.3(8) . . . . ?
 C34 C35 C30 O9 171.7(4) . . . . ?
 C34 C35 C30 C31 -6.3(8) . . . . ?
 C34 C33 C32 C31 -1.7(9) . . . . ?
 C7 C2 C3 C4 -1.1(10) . . . . ?
 C7 C6 C8 N1 -3.1(11) . . . . ?
 C7 C6 C5 C4 2.0(11) . . . . ?
 C30 C35 C34 C36 -167.7(5) . . . . ?
 C30 C35 C34 C33 6.3(7) . . . . ?
 C30 C31 C32 C33 1.9(8) . . . . ?
 C12 N3 C13 C14 2.7(9) . . . . ?
 C36 N7 N8 C37 -167.8(5) . . . . ?
 C36 C34 C33 C32 172.0(5) . . . . ?
 C23 C24 C28 C27 -178.9(12) . . . . ?
 C2 C7 C6 C8 177.4(6) . . . . ?
 C2 C7 C6 C5 -4.2(9) . . . . ?
 C2 C3 C4 C5 -1.3(11) . . . . ?
 C20 C21 C16 O6 -176.6(5) . . . . ?
 C20 C21 C16 C17 2.1(9) . . . . ?
 C20 C19 C18 C17 0.8(10) . . . . ?
 C22 N4 N5 C23 164.6(6) . . . . ?
 C22 C20 C19 C18 -170.5(6) . . . . ?
 C6 C7 C2 O3 -177.1(5) . . . . ?
 C6 C7 C2 C3 3.8(9) . . . . ?
 C9 C10 C11 C12 -172.6(6) . . . . ?
 C16 C21 C20 C22 168.8(5) . . . . ?
 C16 C21 C20 C19 -3.6(8) . . . . ?
 C16 C17 C18 C19 -2.3(11) . . . . ?
 C37 C38 C42 C41 -171.0(8) . . . . ?
 C37 C38 C39 C40 173.0(12) . . . . ?
 C8 N1 N2 C9 171.5(6) . . . . ?
 C8 C6 C5 C4 -179.5(7) . . . . ?
 C13 N3 C12 C11 -0.8(9) . . . . ?
 C13 C14 C10 C9 174.6(6) . . . . ?
 C13 C14 C10 C11 -2.4(9) . . . . ?
 C14 C10 C11 C12 4.1(9) . . . . ?
 C33 C34 C36 N7 -157.6(5) . . . . ?
 C1 O3 C2 C7 -159.4(6) . . . . ?
 C1 O3 C2 C3 19.7(9) . . . . ?
 C29 O9 C30 C35 -173.9(5) . . . . ?
 C29 O9 C30 C31 4.1(8) . . . . ?
 C3 C4 C5 C6 0.9(11) . . . . ?
 C19 C20 C22 N4 -173.7(6) . . . . ?
 C25 C24 C28 C27 9.6(18) . . . . ?
 C38 C42 C41 N9 -3.8(15) . . . . ?
 C38 C39 C40 N9 -1(2) . . . . ?
 C15 O6 C16 C21 176.4(5) . . . . ?
 C15 O6 C16 C17 -2.2(9) . . . . ?
 C26 C25 C24 C23 -176.1(6) . . . . ?
 C26 C25 C24 C28 -4.5(13) . . . . ?
 C26 N6 C27 C28 10(3) . . . . ?
 C5 C6 C8 N1 178.4(7) . . . . ?
 C24 C25 C26 N6 0.8(12) . . . . ?
 C24 C28 C27 N6 -13(3) . . . . ?
 C42 C38 C39 C40 -0.9(18) . . . . ?
 C41 N9 C40 C39 1(2) . . . . ?
 C39 C38 C42 C41 3.2(13) . . . . ?
 C27 N6 C26 C25 -3.0(16) . . . . ?
 C40 N9 C41 C42 1.7(16) . . . . ?

_smtbx_masks_special_details      ?
loop_
  _smtbx_masks_void_nr
  _smtbx_masks_void_average_x
  _smtbx_masks_void_average_y
  _smtbx_masks_void_average_z
  _smtbx_masks_void_volume
  _smtbx_masks_void_count_electrons
  _smtbx_masks_void_content
 1 -0.783 -0.274 -0.356 1858.6 102.2 ?

_shelx_res_file
;
TITL el508b_a.res in P2(1)/n
REM Old TITL EL508B in P21/n #14
REM SHELXT solution in P2(1)/n
REM R1 0.137, Rweak 0.004, Alpha 0.058, Orientation as input
REM Formula found by SHELXT: C43 Cl Dy2 N14 O14
CELL 0.71073 14.28708 19.983947 20.063699 90 101.8568 90
ZERR 4 0.000339 0.000616 0.000654 0 0.0029 0
LATT 1
SYMM 0.5-X,0.5+Y,0.5-Z
SFAC C H Cl Dy N O
UNIT 168 144 12 8 36 36

L.S. 10
PLAN  20
TEMP -100.15
BOND $H
LIST 6
MORE -1
CONF
fmap 2
acta 52
SHEL 10 0.8
OMIT 1 4 1
OMIT -5 4 3
OMIT 1 2 3
OMIT -2 1 2
OMIT -3 0 3
OMIT 2 2 0
OMIT 0 4 1
OMIT 2 4 0
OMIT 3 5 0
OMIT 0 3 2
OMIT -1 3 2
OMIT 4 2 0
OMIT -5 1 1
OMIT 0 0 6
OMIT 1 6 3
OMIT 4 0 0
OMIT 5 3 0
OMIT -3 4 5
OMIT 2 4 2
OMIT -2 3 4
OMIT -3 1 7
OMIT 0 4 6
OMIT -2 3 2
OMIT -2 5 1
OMIT 0 7 3
OMIT -3 1 2
OMIT -2 9 2
OMIT 4 1 2
OMIT -2 2 2
OMIT -2 0 8
OMIT -1 3 1
OMIT -5 2 3
OMIT 3 0 7
OMIT 4 2 1
OMIT 1 3 8
OMIT 3 1 2
OMIT -2 7 4
OMIT 1 0 3
OMIT 3 2 5
OMIT 1 4 2
OMIT 3 9 0
OMIT -2 9 5
OMIT 2 3 3
OMIT 5 2 5
OMIT 0 10 1
OMIT -5 3 1
OMIT -4 1 1
OMIT 1 5 2
OMIT 1 3 4
OMIT -2 2 4
OMIT -2 1 3
OMIT 3 1 0
OMIT -1 6 1
OMIT -1 2 5
OMIT 2 7 3
OMIT 1 5 1
OMIT 1 3 6
OMIT -3 0 1
OMIT 2 1 4
OMIT 4 3 3
OMIT -5 4 2
OMIT 1 8 2
OMIT -3 1 1
OMIT -1 1 7
OMIT 3 3 1
OMIT 2 1 1
OMIT -1 4 3
OMIT 2 5 3
OMIT 2 2 2
OMIT 6 1 1
OMIT 6 0 0
OMIT 1 3 1
OMIT -1 0 5
OMIT 0 0 8
OMIT -6 4 3
OMIT -4 1 4
OMIT -6 2 3
OMIT -1 1 5
OMIT -1 6 5
OMIT -2 2 5
OMIT 0 6 2
OMIT 1 4 5
OMIT 1 8 1
OMIT -1 4 2
OMIT 2 5 1
OMIT 0 2 5
OMIT 5 3 1
OMIT -2 7 1
OMIT -2 10 2
OMIT 2 6 2
OMIT 0 7 1
OMIT -1 6 4
OMIT -4 4 2
OMIT -2 5 4
OMIT -1 0 7
OMIT -2 0 4
OMIT 0 2 6
OMIT 1 1 6
OMIT -1 3 4
OMIT 2 1 5
OMIT 2 0 4
OMIT -1 3 6
OMIT -4 3 3
OMIT 1 6 0
OMIT -7 1 2
OMIT 3 3 4
OMIT 2 4 5
OMIT 4 4 3
OMIT -4 5 4
OMIT -2 3 6
OMIT -1 3 3
OMIT -2 1 4
OMIT -2 5 7
OMIT -3 0 5
OMIT -1 4 6
OMIT -9 0 5
OMIT 5 3 2
OMIT 0 5 1
OMIT 0 0 4
OMIT 1 1 4
OMIT -5 5 2
OMIT -4 4 7
OMIT 0 6 1
OMIT -4 2 6
OMIT 1 3 5
OMIT 0 2 4
OMIT 8 5 1
OMIT 4 2 3
OMIT 2 3 4
OMIT 1 6 2
OMIT 0 3 4
OMIT -7 2 3
OMIT -4 1 3
OMIT -6 2 1
OMIT -4 4 6
OMIT 4 3 0
OMIT 2 0 10
OMIT 2 2 5
OMIT -3 5 6
OMIT -5 1 2
OMIT 3 0 3
OMIT 5 1 0
OMIT 3 0 5
OMIT -3 5 2
OMIT 3 7 8
OMIT -3 4 2
OMIT 5 2 6
OMIT -2 4 9
OMIT 3 1 6
REM <olex2.extras>
REM <HklSrc "%.\\EL508B-mask.hkl">
REM </olex2.extras>

WGHT    0.061600    6.804700
FVAR       0.16922
DY1   4    0.554178    0.351488    0.275705    11.00000    0.01900    0.01500 =
         0.03738   -0.00196    0.00136   -0.00117
DY2   4    0.363341    0.243261    0.290073    11.00000    0.01931    0.01724 =
         0.03842   -0.00098   -0.00005   -0.00327
CL3   3    0.992266    0.444815    0.375230    11.00000    0.06872    0.09241 =
         0.11443    0.01501    0.02681   -0.00369
O2    6    0.527013    0.256357    0.341980    11.00000    0.02042    0.02199 =
         0.04308    0.00617   -0.00443   -0.00330
O5    6    0.406833    0.354427    0.308573    11.00000    0.02265    0.01681 =
         0.04414   -0.00657    0.00735   -0.00140
O8    6    0.448312    0.281914    0.208739    11.00000    0.02386    0.01454 =
         0.04317   -0.00729    0.00181   -0.00281
O9    6    0.414818    0.154043    0.214016    11.00000    0.03523    0.01920 =
         0.05149   -0.00174    0.00995   -0.00208
O7    6    0.661302    0.432501    0.261907    11.00000    0.02452    0.02105 =
         0.04130    0.00222    0.00061   -0.00495
O3    6    0.682954    0.329145    0.379925    11.00000    0.01801    0.02797 =
         0.05501    0.00511   -0.00288   -0.00597
O6    6    0.536515    0.437161    0.367944    11.00000    0.02711    0.02229 =
         0.04213   -0.00671    0.00426   -0.00418
O4    6    0.246397    0.234149    0.182540    11.00000    0.02498    0.03559 =
         0.04704   -0.00086    0.00210   -0.00084
CL2   3    0.662915    0.272552    0.247837    11.00000    0.12594    0.14420 =
         0.15921   -0.00610    0.02373    0.01601
O1    6    0.247200    0.161297    0.296939    11.00000    0.02098    0.02425 =
         0.05833    0.00611   -0.00464   -0.00926
CL1   3    0.322428    0.267431    0.395993    11.00000    0.14442    0.12767 =
         0.13849    0.00568    0.02794   -0.00120
N7    5    0.569567    0.371930    0.155853    11.00000    0.02405    0.01807 =
         0.04565   -0.00267    0.00465   -0.00168
N3    5    0.053484   -0.045844    0.283109    11.00000    0.02291    0.02532 =
         0.03984    0.00274    0.00751   -0.00443
N1    5    0.416791    0.146133    0.371964    11.00000    0.02538    0.01940 =
         0.05255    0.00133   -0.00357   -0.00789
N4    5    0.221058    0.322249    0.269291    11.00000    0.01894    0.03993 =
         0.04072   -0.00516    0.00242   -0.00333
N8    5    0.619097    0.430836    0.146236    11.00000    0.03866    0.02949 =
         0.03376    0.00304    0.00552   -0.00446
AFIX  43
H8    2    0.620434    0.448051    0.106073    11.00000   -1.20000
AFIX   0
N5    5    0.142755    0.298490    0.222895    11.00000    0.01890    0.04578 =
         0.04147   -0.00553   -0.00159    0.00474
AFIX  43
H5    2    0.083871    0.311386    0.222929    11.00000   -1.20000
AFIX   0
N2    5    0.346977    0.098010    0.371107    11.00000    0.03096    0.02605 =
         0.04574    0.00925   -0.00932   -0.01340
AFIX  43
H2    2    0.357761    0.061739    0.396393    11.00000   -1.20000
AFIX   0
C21   1    0.377712    0.403286    0.342745    11.00000    0.03164    0.02186 =
         0.02850    0.00410    0.00823    0.00031
C35   1    0.459964    0.245488    0.155596    11.00000    0.01698    0.02291 =
         0.04114   -0.00119   -0.00213    0.00343
C34   1    0.496625    0.271606    0.100369    11.00000    0.02031    0.02529 =
         0.04393   -0.00501    0.00058    0.00015
C7    1    0.589835    0.234940    0.394811    11.00000    0.02017    0.02253 =
         0.04415    0.00314   -0.00441   -0.00262
C30   1    0.437664    0.176875    0.153786    11.00000    0.01988    0.01981 =
         0.04288   -0.00464    0.00217    0.00371
C12   1    0.140812   -0.059937    0.319011    11.00000    0.03201    0.01867 =
         0.03757    0.00483    0.00625   -0.00503
AFIX  43
H12   2    0.155547   -0.105223    0.331266    11.00000   -1.20000
AFIX   0
C36   1    0.540228    0.337679    0.100441    11.00000    0.02828    0.03288 =
         0.03546    0.00304    0.00464    0.00256
AFIX  43
H36   2    0.547449    0.356397    0.058265    11.00000   -1.20000
AFIX   0
C23   1    0.163640    0.254484    0.178118    11.00000    0.02522    0.04172 =
         0.03201    0.00674    0.00084   -0.00437
C2    1    0.675200    0.272060    0.417580    11.00000    0.02431    0.01501 =
         0.03987   -0.00117   -0.00050    0.00050
C20   1    0.280212    0.413744    0.345114    11.00000    0.02485    0.02209 =
         0.03689    0.00461    0.00239    0.00313
C22   1    0.203801    0.376083    0.302087    11.00000    0.03127    0.03476 =
         0.04246    0.00043    0.00354    0.01137
AFIX  43
H22   2    0.139640    0.390915    0.297637    11.00000   -1.20000
AFIX   0
C6    1    0.577099    0.177888    0.433984    11.00000    0.02545    0.02561 =
         0.05352    0.00598   -0.00009   -0.00157
C9    1    0.263026    0.109270    0.330290    11.00000    0.02993    0.03320 =
         0.04191    0.00146   -0.00244   -0.00963
C16   1    0.443823    0.449552    0.376442    11.00000    0.03021    0.02883 =
         0.03387   -0.00072    0.00424   -0.00185
C37   1    0.663398    0.457286    0.204640    11.00000    0.02598    0.01864 =
         0.04797   -0.00220    0.01113   -0.00067
C8    1    0.492324    0.136503    0.419097    11.00000    0.03195    0.01843 =
         0.05603    0.01341   -0.00797   -0.00758
AFIX  43
H8A   2    0.492022    0.098074    0.446924    11.00000   -1.20000
AFIX   0
C13   1    0.034198    0.018302    0.267289    11.00000    0.02481    0.02295 =
         0.04996    0.00487    0.00318   -0.00483
AFIX  43
H13   2   -0.028478    0.029330    0.243507    11.00000   -1.20000
AFIX   0
C14   1    0.100005    0.069786    0.283433    11.00000    0.03060    0.02341 =
         0.04659   -0.00018    0.00400   -0.00400
AFIX  43
H14   2    0.083159    0.114599    0.270390    11.00000   -1.20000
AFIX   0
C31   1    0.441657    0.137509    0.098548    11.00000    0.02803    0.02510 =
         0.04365   -0.01268   -0.00337   -0.00291
AFIX  43
H31   2    0.423888    0.091691    0.098399    11.00000   -1.20000
AFIX   0
C10   1    0.191025    0.054061    0.319121    11.00000    0.03022    0.02783 =
         0.03360   -0.00128    0.00909   -0.00561
C33   1    0.499928    0.230972    0.044826    11.00000    0.02978    0.04640 =
         0.03650   -0.00242   -0.00163    0.00623
AFIX  43
H33   2    0.522142    0.249093    0.007131    11.00000   -1.20000
AFIX   0
C1    1    0.779817    0.355283    0.385360    11.00000    0.02312    0.05496 =
         0.06822    0.01246   -0.01392   -0.01370
AFIX 137
H1A   2    0.821511    0.319706    0.374556    11.00000   -1.50000
H1B   2    0.804215    0.371246    0.431871    11.00000   -1.50000
H1C   2    0.778647    0.392418    0.353298    11.00000   -1.50000
AFIX   0
C29   1    0.400577    0.083365    0.219068    11.00000    0.08357    0.01855 =
         0.07939   -0.00764    0.03070   -0.01213
AFIX 137
H29A  2    0.393143    0.072321    0.265287    11.00000   -1.50000
H29B  2    0.455983    0.059465    0.209057    11.00000   -1.50000
H29C  2    0.342870    0.069991    0.186313    11.00000   -1.50000
AFIX   0
C11   1    0.211075   -0.012038    0.339341    11.00000    0.02955    0.02571 =
         0.04673    0.00009   -0.00385   -0.00486
AFIX  43
H11   2    0.271422   -0.023967    0.366394    11.00000   -1.20000
AFIX   0
C3    1    0.744003    0.251562    0.471989    11.00000    0.02642    0.03658 =
         0.04749   -0.00270   -0.00455   -0.00935
AFIX  43
H3    2    0.800707    0.277263    0.485293    11.00000   -1.20000
AFIX   0
C32   1    0.471549    0.164504    0.043058    11.00000    0.03169    0.03412 =
         0.04853   -0.02260   -0.00376    0.00708
AFIX  43
H32   2    0.472660    0.137800    0.004056    11.00000   -1.20000
AFIX   0
C19   1    0.254145    0.466177    0.383103    11.00000    0.04245    0.03334 =
         0.04091    0.00349    0.01705    0.01023
AFIX  43
H19   2    0.189112    0.472189    0.385920    11.00000   -1.20000
AFIX   0
C25   1    0.103634    0.186462    0.075955    11.00000    0.04137    0.02204 =
         0.05105   -0.00071   -0.00130    0.00415
AFIX  43
H25   2    0.165053    0.166396    0.081700    11.00000   -1.20000
AFIX   0
C38   1    0.716170    0.520992    0.202094    11.00000    0.04121    0.01728 =
         0.05318   -0.00344    0.01991   -0.00716
C15   1    0.608851    0.485047    0.397789    11.00000    0.04077    0.05690 =
         0.05361   -0.02661    0.00462   -0.02038
AFIX 137
H15A  2    0.669353    0.473919    0.384614    11.00000   -1.50000
H15B  2    0.617573    0.483638    0.447510    11.00000   -1.50000
H15C  2    0.588686    0.530058    0.381484    11.00000   -1.50000
AFIX   0
N6    5   -0.054402    0.196041    0.010064    11.00000    0.04658    0.14056 =
         0.04891   -0.03373   -0.01231   -0.00671
C26   1    0.031844    0.169290    0.021144    11.00000    0.05509    0.03678 =
         0.03872    0.00346   -0.00358    0.00194
AFIX  43
H26   2    0.045318    0.136660   -0.010013    11.00000   -1.20000
AFIX   0
C17   1    0.417011    0.501861    0.412417    11.00000    0.04853    0.03274 =
         0.04207   -0.01534    0.01243    0.00139
AFIX  43
H17   2    0.463558    0.532940    0.434440    11.00000   -1.20000
AFIX   0
C4    1    0.731987    0.193671    0.508002    11.00000    0.03266    0.03555 =
         0.05145    0.00831   -0.00516   -0.00720
AFIX  43
H4    2    0.780532    0.179330    0.544994    11.00000   -1.20000
AFIX   0
C5    1    0.648016    0.157283    0.489003    11.00000    0.03298    0.03431 =
         0.05102    0.00921   -0.01122   -0.00432
AFIX  43
H5A   2    0.638635    0.118059    0.513571    11.00000   -1.20000
AFIX   0
C24   1    0.084910    0.232742    0.121751    11.00000    0.02978    0.07055 =
         0.03996   -0.00584   -0.00147   -0.00723
N9    5    0.805045    0.644031    0.210788    11.00000    0.09921    0.03721 =
         0.08784   -0.00724    0.03884   -0.04075
C18   1    0.323356    0.509416    0.416682    11.00000    0.04669    0.03181 =
         0.05194   -0.01521    0.00617   -0.00076
AFIX  43
H18   2    0.305666    0.544891    0.443103    11.00000   -1.20000
AFIX   0
C42   1    0.786506    0.537818    0.256176    11.00000    0.04439    0.03743 =
         0.10464    0.01877   -0.01622   -0.01324
AFIX  43
H42   2    0.807584    0.506511    0.291723    11.00000   -1.20000
AFIX   0
C41   1    0.827514    0.601592    0.258996    11.00000    0.05488    0.03821 =
         0.11094   -0.00417   -0.00417   -0.02462
AFIX  43
H41   2    0.873798    0.613777    0.298238    11.00000   -1.20000
AFIX   0
C39   1    0.692397    0.565429    0.152011    11.00000    0.15424    0.07146 =
         0.05759    0.00547    0.00347   -0.07325
AFIX  43
H39   2    0.644271    0.555120    0.113162    11.00000   -1.20000
AFIX   0
C28   1   -0.004663    0.265272    0.109453    11.00000    0.03589    0.20350 =
         0.08778   -0.06784   -0.01117    0.01988
AFIX  43
H28   2   -0.018357    0.302321    0.135541    11.00000   -1.20000
AFIX   0
C27   1   -0.070561    0.238464    0.056161    11.00000    0.03650    0.31557 =
         0.10983   -0.13974   -0.03003    0.04498
AFIX  43
H27   2   -0.135012    0.252360    0.052480    11.00000   -1.20000
AFIX   0
C40   1    0.738019    0.626311    0.156960    11.00000    0.26391    0.06011 =
         0.06567    0.02142   -0.01660   -0.10330
AFIX  43
H40   2    0.721126    0.657179    0.120458    11.00000   -1.20000
AFIX   0
HKLF 4

REM  el508b_a.res in P2(1)/n
REM R1 =  0.0452 for    9122 Fo > 4sig(Fo)  and  0.0562 for all   11177 data
REM    589 parameters refined using      0 restraints

END

WGHT      0.0617      6.7257

REM Highest difference peak  1.359,  deepest hole -1.146,  1-sigma level  0.140
Q1    1   0.5587  0.3588  0.3201  11.00000  0.05    1.25
Q2    1   0.7428  0.2821  0.2181  11.00000  0.05    1.17
Q3    1   0.5415  0.3590  0.2284  11.00000  0.05    1.14
Q4    1   0.3157  0.2599  0.3208  11.00000  0.05    1.04
Q5    1   0.5300  0.3575  0.3090  11.00000  0.05    1.03
Q6    1   0.9423  0.6372  0.2246  11.00000  0.05    0.95
Q7    1   0.4108  0.2276  0.2645  11.00000  0.05    0.93
Q8    1  -0.0714  0.2600  0.0497  11.00000  0.05    0.91
Q9    1   0.3795  0.2457  0.2503  11.00000  0.05    0.91
Q10   1   0.3781  0.2463  0.3501  11.00000  0.05    0.85
Q11   1   0.6057  0.3583  0.2475  11.00000  0.05    0.84
Q12   1   0.7425  0.4533  0.2603  11.00000  0.05    0.82
Q13   1   0.7425  0.2460  0.2581  11.00000  0.05    0.77
Q14   1   0.3128  0.2250  0.3227  11.00000  0.05    0.71
Q15   1   0.3625  0.4492  0.2896  11.00000  0.05    0.70
Q16   1   0.0001  0.2161  0.1246  11.00000  0.05    0.64
Q17   1   0.6725  0.2135  0.2467  11.00000  0.05    0.63
Q18   1   0.5514  0.3347  0.2764  11.00000  0.05    0.63
Q19   1  -0.0860  0.1941  0.0847  11.00000  0.05    0.60
Q20   1   0.6652  0.2156  0.2693  11.00000  0.05    0.60
;
_shelx_res_checksum               18645
_shelx_hkl_file
;
 -17   0  -1  294.00   20.58
 -17   0   1  319.76   19.65
 -17   1  -2   53.27    6.51
 -17   1  -1   62.36    6.61
 -17   1   0   60.14   13.56
 -17   1   1    0.20    3.01
 -17   1   2   32.06    4.39
 -17   2  -2    1.38    3.34
 -17   2  -1  152.13   10.26
 -17   2   0    8.29    2.80
 -17   2   1  102.03    8.55
 -17   2   2   52.97    6.04
 -17   2   3   30.84    5.57
 -17   3  -2  114.21    9.00
 -17   3  -1   51.07    8.45
 -17   3   0  168.79   10.31
 -17   3   1  135.25    9.42
 -17   3   2  119.97   13.44
 -17   3   3  223.84   16.85
 -17   4  -1   51.85    5.55
 -17   4   0    0.03    4.82
 -17   4   1    2.28    4.54
 -17   4   2    5.89    4.08
 -17   4   3   19.61    6.28
 -17   5   0    1.62    3.73
 -17   5   1  281.16   20.98
 -17   5   2    5.68    4.80
 -17   5   3  317.54   20.62
 -17   6   1    0.16    6.06
 -17   6   2   54.01    9.61
 -17   6   3    5.40    3.92
 -17   7   2   10.46    4.51
 -17   7   3  181.01   15.52
 -16   0  -6  510.87   28.82
 -16   0  -4  536.12   28.09
 -16   0  -2  393.65   22.77
 -16   0   0  172.68   13.85
 -16   0   2    0.38    4.05
 -16   0   4   97.21    9.95
 -16   0  12  372.98   24.72
 -16   0  14   77.15   12.11
 -16   1  -6   16.66    4.32
 -16   1  -5    0.11    3.29
 -16   1  -4   32.01    7.77
 -16   1  -3    0.45    2.85
 -16   1  -2  240.40   12.16
 -16   1  -1   25.17    4.70
 -16   1   0  505.87   17.59
 -16   1   1   69.84    7.30
 -16   1   2  447.16   16.15
 -16   1   3   46.21    4.58
 -16   1   4  456.96   15.09
 -16   1  11   14.53    5.52
 -16   1  12   44.36    9.17
 -16   1  13   11.72    6.33
 -16   1  14   76.20   10.72
 -16   1  15    0.73    3.31
 -16   2  -6  274.60   14.54
 -16   2  -5  125.47   11.75
 -16   2  -4  401.15   17.15
 -16   2  -3   80.97    7.74
 -16   2  -2  184.00   11.91
 -16   2  -1   72.55    6.91
 -16   2   0   93.73    7.96
 -16   2   1   29.88    4.43
 -16   2   2    0.26    3.16
 -16   2   3    2.34    2.09
 -16   2   4   54.92    5.44
 -16   2   5    1.36    3.33
 -16   2  10  177.80   16.48
 -16   2  11  134.46   14.63
 -16   2  12  110.09   13.70
 -16   2  13  150.55   16.35
 -16   2  14    2.02    4.72
 -16   2  15  114.44   14.51
 -16   3  -5   10.13    5.35
 -16   3  -4    3.03    3.89
 -16   3  -3   15.82    4.12
 -16   3  -2   22.16    4.70
 -16   3  -1   21.42    5.39
 -16   3   0   56.76    6.48
 -16   3   1   33.69    4.84
 -16   3   2   48.13    5.83
 -16   3   3   69.25    6.14
 -16   3   4   65.50    9.14
 -16   3   5  112.28   10.35
 -16   3  10   52.43    8.47
 -16   3  11   27.08    7.88
 -16   3  12   43.41    7.96
 -16   3  13   17.41    7.12
 -16   3  14   45.80   10.27
 -16   3  15    0.25    6.46
 -16   4  -5   20.41    3.71
 -16   4  -4    8.22    2.89
 -16   4  -3    4.95    3.66
 -16   4  -2    1.95    4.86
 -16   4  -1    4.69    2.76
 -16   4   0    1.72    3.00
 -16   4   1    0.66    3.64
 -16   4   2   76.73    9.07
 -16   4   3    1.55    3.90
 -16   4   4   59.83    8.54
 -16   4   5    0.01    4.34
 -16   4   7   17.72    5.63
 -16   4   8   70.43    9.83
 -16   4   9    4.36    4.18
 -16   4  10   18.16    5.50
 -16   4  11   21.03    6.49
 -16   4  12    0.00    4.63
 -16   4  13   23.91    6.41
 -16   4  14   74.10   12.15
 -16   5  -5    0.11    3.90
 -16   5  -4    0.27    3.52
 -16   5  -3    4.91    2.72
 -16   5  -2    0.33    5.86
 -16   5  -1    1.44    5.23
 -16   5   0    2.20    4.43
 -16   5   1    2.19    5.13
 -16   5   2    0.01    5.46
 -16   5   3   10.23    2.79
 -16   5   4    0.37    3.72
 -16   5   5    0.72    2.61
 -16   5   6  107.66   11.50
 -16   5   7    3.22    4.09
 -16   5   8  203.16   15.61
 -16   5   9    0.32    3.70
 -16   5  10  167.13   15.38
 -16   5  11    0.14    4.22
 -16   5  12  170.28   17.55
 -16   5  13   16.50    6.43
 -16   5  14   86.60   12.45
 -16   6  -4    1.31    5.67
 -16   6  -3  138.07   14.18
 -16   6  -2    0.91    4.38
 -16   6  -1   42.43    6.22
 -16   6   0    2.13    4.45
 -16   6   1   22.56    3.78
 -16   6   2   43.71    5.54
 -16   6   3   14.75    3.05
 -16   6   4   25.48    3.59
 -16   6   5   20.83    3.67
 -16   6   6   88.39   11.41
 -16   6   7   41.77    7.15
 -16   6   8   70.84    9.40
 -16   6   9   20.63    5.22
 -16   6  11   10.22    4.73
 -16   6  12    0.50    5.53
 -16   6  13   34.54    8.19
 -16   7  -3   38.81    9.02
 -16   7  -2   70.53   12.66
 -16   7  -1   89.61    7.80
 -16   7   0   47.00    5.67
 -16   7   1  167.16   10.42
 -16   7   2   34.53    7.29
 -16   7   3  310.49   13.48
 -16   7   4  116.15    9.03
 -16   7   5  240.34   13.11
 -16   7   6   20.00    6.47
 -16   7   7  139.49   13.55
 -16   7   8   13.23    5.76
 -16   7   9   46.16    9.87
 -16   7  10   41.33    8.04
 -16   7  11    2.95    4.15
 -16   7  12   44.40    9.63
 -16   7  13    0.82    4.13
 -16   8  -2  158.40   13.87
 -16   8  -1  132.60    9.34
 -16   8   0   53.73    6.95
 -16   8   1   39.15    5.81
 -16   8   2    0.10    2.87
 -16   8   3   15.53    4.48
 -16   8   4    2.12    3.02
 -16   8   5    2.77    2.60
 -16   8   6   77.68   11.53
 -16   8   7   54.34    9.58
 -16   8   8  157.80   15.17
 -16   8   9   53.81    9.16
 -16   8  10   91.63   13.15
 -16   8  11  120.79   13.11
 -16   8  12   47.68    8.47
 -16   9  -1   76.86    9.42
 -16   9   0  340.56   16.14
 -16   9   1  116.07    9.69
 -16   9   2  420.60   17.68
 -16   9   3  122.84    9.16
 -16   9   4  446.39   17.52
 -16   9   5   39.35    9.30
 -16   9   6  244.48   17.30
 -16   9   7   20.95    6.12
 -16   9   8   36.52    9.53
 -16   9   9   28.12    8.03
 -16   9  10    8.14    5.79
 -16  10   0  143.66   14.07
 -16  10   1    2.40    2.92
 -16  10   2    4.95    3.68
 -16  10   3    1.24    3.24
 -16  10   4   20.61    4.67
 -16  10   5    0.15    3.52
 -16  10   6  106.90   18.98
 -16  10   7   27.43    6.71
 -16  10   8  206.74   17.89
 -16  10   9   20.67    6.59
 -16  11   4  276.62   14.83
 -16  11   5   18.31    3.97
 -16  11   6  179.14   11.81
 -15   0  -7  222.38   19.07
 -15   0  -5   31.97    7.09
 -15   0  -3   38.52    8.24
 -15   0  -1  277.18   18.86
 -15   0   1  321.17   17.94
 -15   0   3  561.58   23.58
 -15   0   5  929.98   29.57
 -15   0   9  359.49   20.39
 -15   0  11   32.14    8.88
 -15   0  13   42.34    9.05
 -15   0  15  199.22   19.72
 -15   0  17  214.32   19.07
 -15   1  -8   53.10   12.98
 -15   1  -7  133.04   10.55
 -15   1  -6   79.92    7.35
 -15   1  -5  347.72   16.08
 -15   1  -4   59.70    6.76
 -15   1  -3  528.04   18.79
 -15   1  -2    5.79    7.52
 -15   1  -1  371.24   15.47
 -15   1   0    0.65    2.44
 -15   1   1  208.60   10.02
 -15   1   2    0.29    2.49
 -15   1   3   21.44    6.51
 -15   1   4   14.23    3.40
 -15   1   5   31.48    3.89
 -15   1   6  154.68   10.41
 -15   1   7  298.86   17.43
 -15   1   8  100.13    8.91
 -15   1   9  462.00   25.26
 -15   1  10   37.02    8.38
 -15   1  11  499.91   18.76
 -15   1  12   30.00    5.58
 -15   1  13  373.93   18.46
 -15   1  14   36.92    6.39
 -15   1  15  180.08   13.11
 -15   1  16   24.88    8.87
 -15   1  17   22.88    6.41
 -15   2  -8    7.19    3.28
 -15   2  -7  107.91    8.97
 -15   2  -6   16.60    4.59
 -15   2  -5   38.80    6.31
 -15   2  -4   99.44    8.30
 -15   2  -3    7.02    4.19
 -15   2  -2  178.44   11.27
 -15   2  -1   29.77    4.35
 -15   2   0  231.59   11.01
 -15   2   1  157.06    9.72
 -15   2   2  184.81    8.77
 -15   2   3  369.64   10.74
 -15   2   4  153.95    7.15
 -15   2   5  413.31   10.90
 -15   2   6   70.60    6.78
 -15   2   7  307.42   13.00
 -15   2   8   25.02    3.52
 -15   2   9  137.77   14.31
 -15   2  10    4.27    3.39
 -15   2  11    0.85    5.28
 -15   2  12    0.96    4.15
 -15   2  13   56.52    9.91
 -15   2  14    0.00    4.08
 -15   2  15   93.11   13.51
 -15   2  16    8.74    5.87
 -15   2  17   64.71    8.43
 -15   3  -8  193.43   13.64
 -15   3  -7    9.79    4.30
 -15   3  -6  175.38   11.69
 -15   3  -5   29.12    5.43
 -15   3  -4  159.28   10.91
 -15   3  -3  113.17    8.81
 -15   3  -2   78.39    5.73
 -15   3  -1  184.60    7.98
 -15   3   0    9.07    2.33
 -15   3   1  137.11    6.83
 -15   3   2    0.26    2.03
 -15   3   3   61.85    4.47
 -15   3   4   21.13    3.16
 -15   3   5    0.05    2.47
 -15   3   6   83.79    6.35
 -15   3   7   14.84    3.52
 -15   3   8   32.52    6.08
 -15   3   9   35.16    6.77
 -15   3  10  108.56   11.86
 -15   3  11   93.96   11.82
 -15   3  12  121.81   14.63
 -15   3  13   32.55    9.22
 -15   3  14   68.07   12.08
 -15   3  15    0.77    6.39
 -15   3  16   45.26   11.24
 -15   3  17    7.39    5.99
 -15   4  -8    0.03    3.27
 -15   4  -7  185.20   12.46
 -15   4  -6   52.66    6.89
 -15   4  -5  270.03   11.67
 -15   4  -4   20.95    3.15
 -15   4  -3  263.94   10.62
 -15   4  -2   39.15    3.90
 -15   4  -1  147.78    7.52
 -15   4   0  129.67    6.51
 -15   4   1  108.59    7.01
 -15   4   2   85.89    5.96
 -15   4   3    0.06    2.83
 -15   4   4   32.46    4.01
 -15   4   5   35.10    6.81
 -15   4   6   34.52    5.90
 -15   4   7    0.26    1.76
 -15   4   8   33.16    4.62
 -15   4   9    0.86    5.40
 -15   4  10   12.75    5.12
 -15   4  11    0.19    4.80
 -15   4  12    0.69    5.05
 -15   4  13    0.12    4.10
 -15   4  14    0.07    6.08
 -15   4  15   19.66    6.49
 -15   4  16    0.02    5.18
 -15   4  17    2.00    4.65
 -15   5  -8    8.66    4.17
 -15   5  -7   89.90   11.30
 -15   5  -6    3.90    2.62
 -15   5  -5    0.15    3.47
 -15   5  -4   11.28    3.08
 -15   5  -3    0.06    2.24
 -15   5  -2    8.11    2.31
 -15   5  -1   10.45    2.73
 -15   5   0   32.33    6.43
 -15   5   1   49.62   11.48
 -15   5   2   16.53    3.79
 -15   5   3  192.47    9.70
 -15   5   4    0.93    2.11
 -15   5   5   10.27    2.49
 -15   5   6    0.53    2.39
 -15   5   7    4.57    1.97
 -15   5   8    0.97    2.71
 -15   5   9    1.56    4.15
 -15   5  10    0.14    5.18
 -15   5  11    0.07    4.51
 -15   5  12    0.96    4.90
 -15   5  13    0.00    5.00
 -15   5  14    3.47    5.26
 -15   5  15   27.20    8.51
 -15   5  16   15.78    5.92
 -15   6  -7  143.53   10.86
 -15   6  -6    0.30    4.40
 -15   6  -5  171.02   11.67
 -15   6  -4   14.50    4.36
 -15   6  -3  163.94   10.18
 -15   6  -2   14.91    4.02
 -15   6  -1   91.57   10.71
 -15   6   0   69.45    7.74
 -15   6   1   69.57    6.57
 -15   6   2  150.93   10.27
 -15   6   3    0.05    3.10
 -15   6   4  134.76    8.81
 -15   6   5   20.47    4.33
 -15   6   6   71.04    6.40
 -15   6   7    0.41    1.99
 -15   6   8   77.50    7.88
 -15   6   9    0.11    3.91
 -15   6  10    6.38    3.45
 -15   6  11    0.28    4.80
 -15   6  12    5.78    4.65
 -15   6  13    4.88    4.57
 -15   6  14    0.04    4.54
 -15   6  15   36.24    7.60
 -15   6  16    2.49    4.57
 -15   7  -7    0.01    3.22
 -15   7  -6  207.15   12.96
 -15   7  -5   33.83    6.22
 -15   7  -4  250.58   13.96
 -15   7  -3   71.13    7.95
 -15   7  -2  186.23   11.80
 -15   7  -1  141.77    9.41
 -15   7   0   99.41    7.92
 -15   7   1   49.21    6.44
 -15   7   2   14.12    4.48
 -15   7   3   31.04    7.07
 -15   7   4   19.97    4.58
 -15   7   5    5.13    2.58
 -15   7   6   79.43    6.98
 -15   7   7   14.14    3.02
 -15   7   8  107.49    9.45
 -15   7   9   68.71    8.80
 -15   7  10  131.66   14.41
 -15   7  11   79.44   12.28
 -15   7  12  237.34   19.87
 -15   7  13   23.22    6.88
 -15   7  14  136.64   16.27
 -15   7  15    1.17    5.03
 -15   8  -6    2.29    3.07
 -15   8  -5   14.54    5.17
 -15   8  -4   18.94    4.37
 -15   8  -3    0.11    2.62
 -15   8  -2   65.23    8.25
 -15   8  -1   47.19    6.54
 -15   8   0  182.42   11.07
 -15   8   1  129.94   18.17
 -15   8   2  286.65   20.49
 -15   8   3  245.87   15.93
 -15   8   4  323.83   15.17
 -15   8   5  335.22   14.25
 -15   8   6  213.02   12.21
 -15   8   7  163.51    8.64
 -15   8   8  152.65    9.73
 -15   8   9   47.49    8.53
 -15   8  10   24.10    8.06
 -15   8  11    1.12    5.00
 -15   8  12    0.13    5.27
 -15   8  13   16.86    6.61
 -15   8  14    5.66    4.45
 -15   8  15   64.02   10.87
 -15   9  -5  382.47   17.29
 -15   9  -4  157.44   15.54
 -15   9  -3  386.51   17.16
 -15   9  -2   78.50    8.32
 -15   9  -1  355.68   16.19
 -15   9   0   37.29    6.16
 -15   9   1  165.38   11.41
 -15   9   2   16.62    3.28
 -15   9   3   43.42    5.91
 -15   9   4    0.00    3.92
 -15   9   5   32.60    5.10
 -15   9   6   38.89    5.21
 -15   9   7  171.68   10.92
 -15   9   8   81.09    8.91
 -15   9   9  265.59   26.01
 -15   9  10   85.64   13.58
 -15   9  11  332.38   24.32
 -15   9  12  122.61   14.19
 -15   9  13  302.31   22.95
 -15   9  14   51.07   10.56
 -15  10  -4   32.62    5.87
 -15  10  -3   22.50    5.43
 -15  10  -2   11.39    3.58
 -15  10  -1   98.85    8.92
 -15  10   0    2.95    2.83
 -15  10   1  275.88   21.01
 -15  10   2    8.31    3.92
 -15  10   3  521.17   19.52
 -15  10   4    9.19    9.70
 -15  10   5  606.50   21.36
 -15  10   6   12.27    4.28
 -15  10   7  322.59   14.60
 -15  10   8   19.24    7.92
 -15  10   9  119.59   15.26
 -15  10  10    0.76    4.07
 -15  10  11   16.93    7.64
 -15  10  12   11.11    7.01
 -15  10  13   24.07    8.23
 -15  11  -3  303.99   18.63
 -15  11  -2   10.25    4.97
 -15  11  -1  200.49   12.62
 -15  11   0   13.82    3.62
 -15  11   1  126.44    9.37
 -15  11   2   10.83    5.32
 -15  11   3   54.59    7.10
 -15  11   4   57.72    6.66
 -15  11   5   13.06    6.66
 -15  11   6   50.22    6.52
 -15  11   7  134.11   10.43
 -15  11   8   15.59    4.22
 -15  11   9  322.69   16.70
 -15  11  10    5.29    6.72
 -15  11  11  387.54   25.58
 -15  11  12    6.19    5.72
 -15  12  -1   24.66    4.91
 -15  12   0   81.19    7.58
 -15  12   1  108.95   10.25
 -15  12   2   15.22    4.49
 -15  12   3  119.91   10.01
 -15  12   4   19.26    4.66
 -15  12   5  156.78   13.94
 -15  12   6    1.89    4.46
 -15  12   7  165.86   17.50
 -15  12   8    2.10    4.44
 -15  12   9   51.32    7.99
 -15  12  10    0.86    3.38
 -15  13   1   64.31    7.28
 -15  13   2   20.93    3.56
 -15  13   3   45.23    6.35
 -15  13   4   21.55    4.43
 -15  13   5    6.96    4.16
 -15  13   6   28.53    8.93
 -15  13   7    2.96    5.28
 -15  13   8   67.40   12.37
 -14   0 -10    0.33    4.22
 -14   0  -8    1.41    4.18
 -14   0  -6   38.04    6.63
 -14   0  -4  191.16   16.31
 -14   0  -2  351.26   18.64
 -14   0   0  221.85    9.74
 -14   0   2   38.08    6.86
 -14   0   4    0.85    2.94
 -14   0   6   16.24    6.59
 -14   0   8  169.13   12.59
 -14   0  10  298.06   19.00
 -14   0  12  408.74   22.82
 -14   0  14  329.43   23.44
 -14   0  16  178.47   17.23
 -14   0  18  117.29   14.07
 -14   1 -11    7.80    3.23
 -14   1 -10    0.17    3.27
 -14   1  -9    0.22    3.61
 -14   1  -8   30.05    4.89
 -14   1  -7    7.29    2.84
 -14   1  -6   48.60    5.85
 -14   1  -5   19.21    4.19
 -14   1  -4   76.63    6.96
 -14   1  -3   29.49    2.65
 -14   1  -2    0.28    2.62
 -14   1  -1  112.19    6.37
 -14   1   0    0.32    2.09
 -14   1   1   36.17    3.60
 -14   1   2   88.75    5.04
 -14   1   3   33.14    2.94
 -14   1   4  254.20    7.58
 -14   1   5   47.08    2.15
 -14   1   6  476.80    8.56
 -14   1   7   31.61    2.63
 -14   1   8  296.39   18.26
 -14   1   9    4.82    2.89
 -14   1  10  120.55    9.19
 -14   1  11    0.02    2.78
 -14   1  12    5.15    3.12
 -14   1  13    5.30    3.99
 -14   1  14   18.00    4.30
 -14   1  15   13.18    4.33
 -14   1  16  118.28   20.93
 -14   1  17   21.64    5.56
 -14   1  18  145.69   11.66
 -14   1  19    8.65    4.52
 -14   2 -11  136.82   10.90
 -14   2 -10   58.08    7.61
 -14   2  -9  198.24   12.53
 -14   2  -8   43.45    5.96
 -14   2  -7  193.88   11.49
 -14   2  -6    0.09    3.27
 -14   2  -5  249.69   12.42
 -14   2  -4   40.60    3.64
 -14   2  -3  120.28    6.88
 -14   2  -2   65.11    5.10
 -14   2  -1   13.55    2.09
 -14   2   0  189.62    8.30
 -14   2   1    2.36    1.87
 -14   2   2  256.93    8.89
 -14   2   3   16.15    2.72
 -14   2   4  153.99    5.58
 -14   2   5  239.79    7.53
 -14   2   6   87.18    4.13
 -14   2   7  402.28    9.11
 -14   2   8    2.49    2.11
 -14   2   9  277.34   19.04
 -14   2  10   95.89   12.59
 -14   2  11  169.84   14.55
 -14   2  12  254.12   12.84
 -14   2  13   50.79    6.95
 -14   2  14  234.84   13.27
 -14   2  15   29.81    5.23
 -14   2  16  118.56   10.95
 -14   2  17   10.40    5.36
 -14   2  18   75.33    9.07
 -14   2  19    0.02    3.75
 -14   3 -10    4.85    3.79
 -14   3  -9    0.01    3.13
 -14   3  -8   65.24    7.16
 -14   3  -7   20.91    4.06
 -14   3  -6  204.39   14.91
 -14   3  -5   80.08    5.95
 -14   3  -4  447.37   13.69
 -14   3  -3  181.92    8.39
 -14   3  -2  302.23   10.24
 -14   3  -1  436.90   13.30
 -14   3   0  472.99   12.99
 -14   3   1  267.61    8.67
 -14   3   2   85.83    5.68
 -14   3   3  259.42    8.60
 -14   3   4   99.73    4.82
 -14   3   5  102.66    5.19
 -14   3   6  217.77    8.32
 -14   3   7   21.40    3.01
 -14   3   8  140.32    7.52
 -14   3   9    0.44    3.34
 -14   3  10   85.08   11.89
 -14   3  11   32.37    6.60
 -14   3  12   91.95   11.82
 -14   3  13   37.69    8.74
 -14   3  14    6.70    4.93
 -14   3  15   46.15   10.52
 -14   3  16    3.51    4.71
 -14   3  17   58.34   11.17
 -14   3  18    3.99    4.93
 -14   4 -10  479.64   19.63
 -14   4  -9   90.08    8.74
 -14   4  -8  518.78   19.76
 -14   4  -7  109.54    9.58
 -14   4  -6  168.16    9.00
 -14   4  -5   99.62    6.59
 -14   4  -4   13.73    2.70
 -14   4  -3   37.54    3.71
 -14   4  -2    0.13    2.00
 -14   4  -1    0.22    1.91
 -14   4   0   96.51    6.43
 -14   4   1   18.83    3.69
 -14   4   2  469.17   12.94
 -14   4   3   23.34    3.54
 -14   4   4  557.59   13.89
 -14   4   5   68.62    5.38
 -14   4   6  349.89   10.52
 -14   4   7   77.19    4.80
 -14   4   8  148.17    8.18
 -14   4   9   47.23    9.55
 -14   4  10   23.71    7.43
 -14   4  11   51.31    8.18
 -14   4  12    4.26    4.10
 -14   4  13   22.50    6.52
 -14   4  14    0.93    5.00
 -14   4  15    1.52    4.82
 -14   4  16    1.26    5.48
 -14   4  17    0.01    5.37
 -14   4  18    0.98    4.92
 -14   5 -10   10.40    4.14
 -14   5  -9    0.46    4.22
 -14   5  -8   86.29    7.90
 -14   5  -7    7.30    2.74
 -14   5  -6  412.55   13.41
 -14   5  -5    5.46    2.53
 -14   5  -4 1109.71   22.72
 -14   5  -3    2.43    2.75
 -14   5  -2  957.39   20.39
 -14   5  -1   20.36    3.97
 -14   5   0 1098.36   20.45
 -14   5   1   12.59    5.60
 -14   5   2  612.08   18.06
 -14   5   3   31.17    4.51
 -14   5   4    8.79    4.12
 -14   5   5    6.18    1.98
 -14   5   6    2.16    1.79
 -14   5   7    7.48    1.83
 -14   5   8   76.53    7.31
 -14   5   9    9.89    4.83
 -14   5  10  154.73   14.70
 -14   5  11    0.03    3.75
 -14   5  12  210.12   17.52
 -14   5  13    0.21    5.48
 -14   5  14   40.61    8.69
 -14   5  15    0.07    5.27
 -14   5  16    6.04    5.37
 -14   5  17    0.31    5.86
 -14   5  18    0.31    7.77
 -14   6 -10  513.25   29.76
 -14   6  -9   25.86    7.58
 -14   6  -8  422.62   26.28
 -14   6  -7   18.15    4.22
 -14   6  -6  122.81    9.47
 -14   6  -5   37.03    4.65
 -14   6  -4   50.66    6.83
 -14   6  -3   15.10    3.29
 -14   6  -2    0.58    2.49
 -14   6  -1   10.65    3.44
 -14   6   0  118.52    7.90
 -14   6   1   16.15    3.83
 -14   6   2  327.70   14.80
 -14   6   3    0.12    2.53
 -14   6   4  360.39   11.13
 -14   6   5   25.19    3.42
 -14   6   6  365.87   12.02
 -14   6   7   39.20    3.43
 -14   6   8  175.44    9.75
 -14   6   9   38.96    6.59
 -14   6  10   23.05    7.28
 -14   6  11   71.12   12.02
 -14   6  12   12.43    5.62
 -14   6  13   82.56   11.92
 -14   6  14    1.43    4.95
 -14   6  15   60.09   10.58
 -14   6  16    4.83    5.04
 -14   6  17   16.13    6.28
 -14   6  18    8.07    6.40
 -14   7  -9    8.72    5.77
 -14   7  -8   55.47    6.89
 -14   7  -7    2.54    3.09
 -14   7  -6  168.51   11.18
 -14   7  -5   54.66    6.12
 -14   7  -4  371.81   21.05
 -14   7  -3   90.57    7.97
 -14   7  -2  232.84   12.15
 -14   7  -1  202.94   10.95
 -14   7   0  148.68   10.04
 -14   7   1  268.33   24.86
 -14   7   2   16.71    5.84
 -14   7   3  331.95   20.75
 -14   7   4  124.90    6.82
 -14   7   5  239.55    9.46
 -14   7   6   77.10    6.16
 -14   7   7  172.70    7.91
 -14   7   8  136.44    8.41
 -14   7   9   38.04   11.89
 -14   7  10  110.95   12.76
 -14   7  11    4.65    5.16
 -14   7  12   70.15   12.82
 -14   7  13    4.60    4.99
 -14   7  14    2.08    6.12
 -14   7  15   18.47    6.51
 -14   7  16    2.26    6.68
 -14   7  17   61.79   11.28
 -14   8  -9   60.38    7.31
 -14   8  -8    9.15    3.50
 -14   8  -7   46.87    5.43
 -14   8  -6    0.15    2.80
 -14   8  -5  104.19    8.84
 -14   8  -4   10.66    3.53
 -14   8  -3   86.47    7.90
 -14   8  -2   79.39    7.78
 -14   8  -1   31.26    5.25
 -14   8   0  157.92    9.62
 -14   8   1    0.07    3.78
 -14   8   2  100.90    7.76
 -14   8   3   10.76    2.73
 -14   8   4   54.86    4.75
 -14   8   5   42.41    4.28
 -14   8   6    3.30    2.34
 -14   8   7  124.06    7.16
 -14   8   8   37.04    5.53
 -14   8   9  130.47    8.68
 -14   8  10  102.34   12.15
 -14   8  11  168.84   16.93
 -14   8  12  228.55   19.99
 -14   8  13  178.73   18.07
 -14   8  14  141.84   15.94
 -14   8  15   98.79   12.72
 -14   8  16   98.84   14.72
 -14   8  17   38.73    9.20
 -14   9  -8   22.29    6.32
 -14   9  -7    6.81    3.98
 -14   9  -6   11.56    3.46
 -14   9  -5    0.31    3.17
 -14   9  -4    9.22    3.46
 -14   9  -3   14.93    4.89
 -14   9  -2    2.02    2.99
 -14   9  -1    1.20    2.86
 -14   9   0   43.27    5.71
 -14   9   1   42.50    4.93
 -14   9   2  135.76    9.60
 -14   9   3  133.01    9.23
 -14   9   4  431.10   13.67
 -14   9   5   37.17    3.64
 -14   9   6  414.00   12.43
 -14   9   7   71.27    5.99
 -14   9   8  281.72   11.50
 -14   9   9   77.38   10.65
 -14   9  10   74.56   10.14
 -14   9  11   10.42    4.81
 -14   9  12    4.08    5.57
 -14   9  13    0.01    5.20
 -14   9  14   44.19    9.48
 -14   9  15   10.63    5.76
 -14   9  16   79.63   13.51
 -14  10  -7   36.34    5.51
 -14  10  -6   68.77    8.09
 -14  10  -5    8.24    4.06
 -14  10  -4  145.92   10.75
 -14  10  -3    0.13    2.86
 -14  10  -2  130.07   10.14
 -14  10  -1   21.87    4.57
 -14  10   0  102.43    8.05
 -14  10   1   28.17    5.07
 -14  10   2   52.16    7.40
 -14  10   3   80.81    7.40
 -14  10   4    7.91    7.25
 -14  10   5  131.38    6.88
 -14  10   6    8.30    3.09
 -14  10   7   31.66    8.52
 -14  10   8  146.08   20.48
 -14  10   9    1.21    3.97
 -14  10  10  268.36   20.50
 -14  10  11   12.58    5.67
 -14  10  12  316.74   24.12
 -14  10  13   13.59    6.97
 -14  10  14  235.82   20.65
 -14  10  15    5.86    5.25
 -14  11  -6   16.23    4.73
 -14  11  -5   89.20    9.11
 -14  11  -4   12.92    9.88
 -14  11  -3  198.76   12.08
 -14  11  -2    3.77    3.52
 -14  11  -1  167.51   12.05
 -14  11   0   20.11    3.34
 -14  11   1  111.12    9.41
 -14  11   2  108.81   14.66
 -14  11   3   16.39    4.17
 -14  11   4  192.56   16.94
 -14  11   5    5.56    4.23
 -14  11   6  193.89   11.87
 -14  11   7    0.70    4.06
 -14  11   8  179.81   11.06
 -14  11   9    4.10    4.03
 -14  11  10   66.54   11.28
 -14  11  11   13.44    6.58
 -14  11  12    2.51    4.50
 -14  11  13   17.86    6.76
 -14  11  14   11.53    4.80
 -14  12  -5  128.91   11.00
 -14  12  -4    1.91    2.97
 -14  12  -3   44.83    7.05
 -14  12  -2   24.06    4.00
 -14  12  -1    0.29    3.34
 -14  12   0   44.80    6.52
 -14  12   1   48.74    6.98
 -14  12   2  160.36   10.30
 -14  12   3  212.29   17.90
 -14  12   4  126.62   14.31
 -14  12   5  389.58   16.68
 -14  12   6   66.14    8.15
 -14  12   7  246.49   14.16
 -14  12   8    0.80    3.37
 -14  12   9  179.68   16.11
 -14  12  10   21.11    8.12
 -14  12  11   97.01   12.94
 -14  12  12   92.28   13.34
 -14  12  13   16.59    5.02
 -14  13  -4  184.92   12.79
 -14  13  -3  248.56   16.39
 -14  13  -2  226.36   13.97
 -14  13  -1  362.65   27.00
 -14  13   0  162.88   11.60
 -14  13   1  201.09   11.88
 -14  13   2   28.95    7.79
 -14  13   3   79.79   11.12
 -14  13   4    7.81    4.08
 -14  13   5   12.43    3.67
 -14  13   6  107.96   11.80
 -14  13   7    1.56    3.06
 -14  13   8  103.42    8.77
 -14  13   9   20.91    4.14
 -14  13  10   33.46    8.60
 -14  13  11   24.04    7.87
 -14  13  12   15.57    5.73
 -14  14  -2    6.54    4.42
 -14  14  -1   11.26    4.23
 -14  14   0   38.92   11.69
 -14  14   1   62.02   10.94
 -14  14   2  234.39   20.48
 -14  14   3   61.14   11.84
 -14  14   4  265.72   22.20
 -14  14   5   91.17   12.73
 -14  14   6  212.78   20.09
 -14  14   7  102.43    8.40
 -14  14   8  115.04   10.05
 -14  14   9   16.50    4.60
 -14  14  10   30.36    7.48
 -14  15   1    5.50    4.94
 -14  15   2  170.98   17.31
 -14  15   3    1.46    4.97
 -14  15   4   35.18    8.98
 -14  15   5    2.63    4.39
 -14  15   6    0.00    4.00
 -14  15   7   15.53    3.46
 -13   0 -11  124.00   13.28
 -13   0  -9   94.50   11.75
 -13   0  -7   52.75    8.36
 -13   0  -5   35.34    5.14
 -13   0  -3    4.41    3.59
 -13   0  -1   26.24    5.28
 -13   0   1    1.37    1.97
 -13   0   3    1.20    1.81
 -13   0   5   89.67    5.16
 -13   0   7   38.26    3.47
 -13   0   9   12.47    4.72
 -13   0  11    6.95    4.92
 -13   0  13   14.60    5.89
 -13   0  15    3.56    6.03
 -13   0  17   18.20    7.06
 -13   0  19   77.79   13.77
 -13   1 -12   32.75    8.94
 -13   1 -11   19.57    4.33
 -13   1 -10   37.77    4.69
 -13   1  -9    0.05    3.25
 -13   1  -8   24.68    5.99
 -13   1  -7   20.56    6.04
 -13   1  -6   87.17   13.09
 -13   1  -5   12.24    3.34
 -13   1  -4   55.27    3.68
 -13   1  -3   25.19    2.93
 -13   1  -2    0.81    1.89
 -13   1  -1   65.04    4.45
 -13   1   0  111.93    4.42
 -13   1   1    7.01    1.72
 -13   1   2   17.29    1.56
 -13   1   3   10.75    1.47
 -13   1   4   23.87    1.84
 -13   1   5   45.02    3.67
 -13   1   6  191.44    4.98
 -13   1   7    2.31    1.25
 -13   1   8  255.18    6.09
 -13   1   9   28.27    2.45
 -13   1  10   57.21    7.61
 -13   1  11   33.86    6.53
 -13   1  12    8.69    3.15
 -13   1  13   85.78    7.60
 -13   1  14    9.14    3.28
 -13   1  15  115.54    9.62
 -13   1  16    6.44    5.04
 -13   1  17   57.52    7.75
 -13   1  18    1.27    6.15
 -13   1  19   14.36    5.20
 -13   1  20   13.45    6.59
 -13   2 -12    0.18    3.24
 -13   2 -11  112.21    9.75
 -13   2 -10   12.28    3.99
 -13   2  -9   55.61    6.20
 -13   2  -8   34.76    6.05
 -13   2  -7    2.44    2.73
 -13   2  -6   74.92   13.41
 -13   2  -5   38.82    5.26
 -13   2  -4  168.56    8.29
 -13   2  -3  118.54    7.17
 -13   2  -2  436.79   12.09
 -13   2  -1  225.46    8.40
 -13   2   0  127.01    5.32
 -13   2   1   95.36    3.89
 -13   2   2   48.04    2.50
 -13   2   3   76.10    2.71
 -13   2   4   74.75    3.67
 -13   2   5   16.61    2.29
 -13   2   6   97.38    3.38
 -13   2   7    4.65    1.88
 -13   2   8    3.68    2.44
 -13   2   9  127.08    9.90
 -13   2  10   24.30    4.67
 -13   2  11   91.78    9.16
 -13   2  12   59.46    5.55
 -13   2  13   44.39    8.91
 -13   2  14   40.49    6.07
 -13   2  15   17.23    5.46
 -13   2  16  141.99   10.94
 -13   2  17    0.15    3.57
 -13   2  18  106.44   12.47
 -13   2  19   39.58    6.42
 -13   2  20   25.41    6.23
 -13   3 -12   93.93    8.77
 -13   3 -11   67.56    8.14
 -13   3 -10  284.50   15.39
 -13   3  -9  209.83   12.33
 -13   3  -8  168.91   14.19
 -13   3  -7  368.61   16.01
 -13   3  -6  151.14    7.91
 -13   3  -5  322.11   11.34
 -13   3  -4   37.37    4.95
 -13   3  -3  208.14    8.26
 -13   3  -2    1.34    1.96
 -13   3  -1   68.29    5.74
 -13   3   0  114.38    8.02
 -13   3   1   83.93    3.46
 -13   3   2   52.74    2.54
 -13   3   3  288.01    7.08
 -13   3   4  252.34    4.72
 -13   3   5  719.85   10.53
 -13   3   6  446.70    9.60
 -13   3   7  717.63   17.86
 -13   3   8  391.80   35.90
 -13   3   9  263.55   10.17
 -13   3  10  228.68   18.00
 -13   3  11    6.41    5.88
 -13   3  12   98.25   11.69
 -13   3  13   22.32    7.65
 -13   3  14   11.42    4.39
 -13   3  15   33.17    5.99
 -13   3  16    1.65    3.21
 -13   3  17   55.05    7.71
 -13   3  18    2.07    3.39
 -13   3  19   18.54    4.97
 -13   3  20   13.25    4.79
 -13   4 -12    3.90    5.86
 -13   4 -11   87.98    7.80
 -13   4 -10    3.46    6.50
 -13   4  -9    0.78    4.64
 -13   4  -8   13.71    5.17
 -13   4  -7   56.46    6.93
 -13   4  -6   12.84    4.39
 -13   4  -5  464.08   14.48
 -13   4  -4   27.82    4.03
 -13   4  -3  957.66   19.86
 -13   4  -2  192.59    7.73
 -13   4  -1 1282.21   22.16
 -13   4   0  214.22   13.13
 -13   4   1 1174.32   17.19
 -13   4   2  251.32    8.52
 -13   4   3  442.37   10.14
 -13   4   4   63.22    4.59
 -13   4   5   45.94    3.44
 -13   4   6   11.10    2.01
 -13   4   7   20.18    2.45
 -13   4   8    1.78    2.24
 -13   4   9  197.84    9.20
 -13   4  10   13.95    4.06
 -13   4  11  497.03   25.59
 -13   4  12  106.19   12.31
 -13   4  13  485.60   28.32
 -13   4  14   87.23   12.31
 -13   4  15  374.88   24.83
 -13   4  16   80.11   12.30
 -13   4  17  132.12   16.47
 -13   4  18   31.18    9.18
 -13   4  19   17.88    7.27
 -13   4  20   13.88    6.87
 -13   5 -12    0.22    4.58
 -13   5 -11  319.59   16.34
 -13   5 -10    5.47    2.76
 -13   5  -9  569.25   21.17
 -13   5  -8    6.76    5.04
 -13   5  -7  481.37   14.38
 -13   5  -6    7.29    2.87
 -13   5  -5  222.48    9.27
 -13   5  -4    0.49    2.23
 -13   5  -3  145.89    7.95
 -13   5  -2   25.96    3.06
 -13   5  -1   29.90    4.13
 -13   5   0    2.81    2.94
 -13   5   1  273.93    8.73
 -13   5   2   23.74    2.69
 -13   5   3 1112.24   23.11
 -13   5   4   60.78    4.62
 -13   5   5 1346.53   21.76
 -13   5   6   26.34    6.92
 -13   5   7 1002.67   23.39
 -13   5   8    9.46    6.34
 -13   5   9  533.02   15.12
 -13   5  10    0.08    2.28
 -13   5  11  184.01   16.11
 -13   5  12    0.93    5.41
 -13   5  13   69.47   11.87
 -13   5  14    3.26    5.80
 -13   5  15    0.60    5.60
 -13   5  16   12.32    5.44
 -13   5  17   70.90   10.70
 -13   5  18   18.30    5.13
 -13   5  19   42.90   10.80
 -13   6 -12    6.81    5.56
 -13   6 -11   96.00   12.52
 -13   6 -10   21.33    5.18
 -13   6  -9    6.04    6.10
 -13   6  -8   22.26    3.78
 -13   6  -7   43.60    4.76
 -13   6  -6   89.68    6.89
 -13   6  -5  494.81   14.73
 -13   6  -4   80.24    6.32
 -13   6  -3  890.60   24.40
 -13   6  -2  130.02    8.98
 -13   6  -1 1182.19   27.27
 -13   6   0  240.88   19.56
 -13   6   1 1116.29   19.34
 -13   6   2  133.63    7.39
 -13   6   3  291.44    9.82
 -13   6   4   48.63    5.30
 -13   6   5   61.70    5.16
 -13   6   6   12.03    2.70
 -13   6   7   16.29    3.03
 -13   6   8   20.13    4.10
 -13   6   9  188.10    9.59
 -13   6  10    6.54    2.84
 -13   6  11  404.90   24.27
 -13   6  12   33.15    9.70
 -13   6  13  404.54   24.84
 -13   6  14   61.00    9.35
 -13   6  15  307.23   22.06
 -13   6  16   21.83    7.61
 -13   6  17   57.15   11.26
 -13   6  18   20.58    7.32
 -13   6  19   11.63    5.14
 -13   7 -11  105.22   13.87
 -13   7 -10   78.10   12.16
 -13   7  -9  116.02   10.43
 -13   7  -8   14.41    4.06
 -13   7  -7  221.70   13.35
 -13   7  -6    0.84    2.96
 -13   7  -5  399.04   15.58
 -13   7  -4    0.59    2.68
 -13   7  -3  239.40   12.03
 -13   7  -2    7.17    2.47
 -13   7  -1    1.81    2.44
 -13   7   0   11.46    3.63
 -13   7   1  104.60    5.46
 -13   7   2   46.42    4.09
 -13   7   3  410.72   23.02
 -13   7   4  105.86    5.74
 -13   7   5  660.14   14.64
 -13   7   6  146.40    7.85
 -13   7   7  519.40   17.02
 -13   7   8  107.73    6.95
 -13   7   9  148.74    9.13
 -13   7  10  120.73   12.43
 -13   7  11    0.03    3.78
 -13   7  12  217.64   17.90
 -13   7  13    2.91    4.82
 -13   7  14  120.73   15.19
 -13   7  15   19.68    5.70
 -13   7  16   17.99    7.08
 -13   7  17   85.45   13.21
 -13   7  18    0.28    5.85
 -13   7  19   49.78   10.65
 -13   8 -11  104.98   13.19
 -13   8 -10   46.52    8.58
 -13   8  -9   59.83    7.44
 -13   8  -8   42.53    6.55
 -13   8  -7   31.67    5.24
 -13   8  -6  101.32    8.17
 -13   8  -5    6.61    3.06
 -13   8  -4   79.29    7.23
 -13   8  -3   65.67    8.69
 -13   8  -2  112.53    8.90
 -13   8  -1   51.07    6.53
 -13   8   0   63.52    7.58
 -13   8   1   10.17    3.31
 -13   8   2   84.47    5.43
 -13   8   3    6.71    2.45
 -13   8   4   53.74    6.60
 -13   8   5    8.94    4.17
 -13   8   6    2.50    3.02
 -13   8   7   27.84    5.97
 -13   8   8    0.75    3.35
 -13   8   9  121.54   14.38
 -13   8  10    0.21    4.00
 -13   8  11  112.37   10.50
 -13   8  12    2.79    4.04
 -13   8  13   14.86    7.05
 -13   8  14   23.30    6.69
 -13   8  15    5.65    4.16
 -13   8  16   58.16   10.15
 -13   8  17    0.09    5.65
 -13   8  18   87.53   12.72
 -13   9 -10    1.27    2.65
 -13   9  -9    1.28    4.19
 -13   9  -8    2.69    2.67
 -13   9  -7   18.64    6.95
 -13   9  -6    0.24    2.87
 -13   9  -5   28.86    6.32
 -13   9  -4    1.52    2.79
 -13   9  -3   15.10    3.76
 -13   9  -2   14.62    4.00
 -13   9  -1    4.78    3.02
 -13   9   0   43.27    4.96
 -13   9   1    0.52    2.65
 -13   9   2    2.61    2.11
 -13   9   3    2.09    2.25
 -13   9   4    1.38    3.45
 -13   9   5   15.64    3.18
 -13   9   6   21.54    4.01
 -13   9   7    0.27    4.18
 -13   9   8   24.04    4.68
 -13   9   9   30.95    6.73
 -13   9  10    0.19    3.70
 -13   9  11   89.91   11.21
 -13   9  12   24.42    6.34
 -13   9  13  109.92   13.89
 -13   9  14   16.33    7.80
 -13   9  15  106.13   13.70
 -13   9  16   29.94    8.58
 -13   9  17   59.86   10.99
 -13   9  18    7.94    5.98
 -13  10  -9  120.52   10.48
 -13  10  -8    0.73    3.28
 -13  10  -7   58.51    7.28
 -13  10  -6    0.12    6.19
 -13  10  -5   29.21    5.48
 -13  10  -4   18.96    4.02
 -13  10  -3   44.30    6.21
 -13  10  -2   56.34    6.98
 -13  10  -1   14.49    4.24
 -13  10   0   71.21    6.29
 -13  10   1   13.44    2.76
 -13  10   2   14.89    3.00
 -13  10   3   21.93    4.69
 -13  10   4   10.16    2.70
 -13  10   5   30.74    5.12
 -13  10   6   13.43    6.57
 -13  10   7   29.80    5.35
 -13  10   8    4.45    5.33
 -13  10   9   19.41    4.97
 -13  10  10   20.16    6.52
 -13  10  11   13.92    4.65
 -13  10  12   52.44    8.71
 -13  10  13    0.32    4.40
 -13  10  14   47.57    9.68
 -13  10  15    0.83    5.24
 -13  10  16   10.89    4.36
 -13  10  17   37.62    8.97
 -13  11  -9    5.92    3.49
 -13  11  -8  172.34   17.28
 -13  11  -7   11.29    3.68
 -13  11  -6  166.07   11.78
 -13  11  -5    2.52    4.83
 -13  11  -4  203.02   11.58
 -13  11  -3    4.84    2.82
 -13  11  -2   26.37    4.82
 -13  11  -1   20.45    4.03
 -13  11   0    0.93    3.77
 -13  11   1    1.91    3.41
 -13  11   2   87.92    7.77
 -13  11   3   61.43    5.98
 -13  11   4  321.70   15.21
 -13  11   5   64.43    7.07
 -13  11   6  361.22   15.46
 -13  11   7    5.00    3.37
 -13  11   8  229.45   18.36
 -13  11   9   20.18    6.30
 -13  11  10  136.19   14.31
 -13  11  11   24.39    6.46
 -13  11  12   11.58    5.55
 -13  11  13   60.91   11.12
 -13  11  14    0.49    5.80
 -13  11  15   69.02   11.76
 -13  11  16    0.17    6.17
 -13  12  -8    9.26    3.62
 -13  12  -7    4.81    9.98
 -13  12  -6   72.31    8.21
 -13  12  -5    1.32    8.78
 -13  12  -4  202.07   13.06
 -13  12  -3   40.14    6.72
 -13  12  -2  408.73   17.83
 -13  12  -1   89.38    8.65
 -13  12   0  398.21   25.07
 -13  12   1   28.09    6.85
 -13  12   2  227.07   12.37
 -13  12   3    8.62    5.60
 -13  12   4  158.61   10.57
 -13  12   5    2.79    6.48
 -13  12   6   64.03    7.70
 -13  12   7    9.76    4.20
 -13  12   8    9.90    6.15
 -13  12   9    0.76    4.88
 -13  12  10  103.94   11.53
 -13  12  11   15.28    5.71
 -13  12  12   79.45   12.42
 -13  12  13   18.90    6.19
 -13  12  14  106.29   12.61
 -13  12  15   10.41    7.37
 -13  13  -7  204.07   13.39
 -13  13  -6  190.64   11.90
 -13  13  -5  160.84   12.06
 -13  13  -4  162.03   11.98
 -13  13  -3   74.41   10.26
 -13  13  -2   27.77    5.34
 -13  13  -1    7.31    5.43
 -13  13   0   17.83    4.93
 -13  13   1   99.73   12.67
 -13  13   2  148.31   10.10
 -13  13   3  193.23   11.52
 -13  13   4  285.36   13.57
 -13  13   5  428.71   17.37
 -13  13   6  343.82   16.63
 -13  13   7  433.68   19.18
 -13  13   8  309.00   16.01
 -13  13   9  185.12   17.27
 -13  13  10  148.02   14.93
 -13  13  11   14.68    6.29
 -13  13  12   24.13    7.54
 -13  13  13    2.39    4.89
 -13  13  14    0.20    4.37
 -13  14  -5  201.78   14.33
 -13  14  -4   73.92    8.17
 -13  14  -3  432.58   19.28
 -13  14  -2  164.54   16.04
 -13  14  -1  629.29   31.76
 -13  14   0  136.20   15.99
 -13  14   1  525.51   30.01
 -13  14   2  174.20   16.60
 -13  14   3  234.05   13.61
 -13  14   4   60.99    6.77
 -13  14   5   41.53    5.84
 -13  14   6    5.54    3.37
 -13  14   7    4.12    3.44
 -13  14   8    6.51    3.03
 -13  14   9   73.13    9.65
 -13  14  10   76.07   12.41
 -13  14  11  175.20   18.48
 -13  14  12  117.24   15.42
 -13  14  13  178.96   18.12
 -13  15  -4   22.62    5.06
 -13  15  -3   87.81    9.48
 -13  15  -2   11.08    5.54
 -13  15  -1    1.18    4.36
 -13  15   0    0.58    4.82
 -13  15   1  126.69   14.59
 -13  15   2    9.96    5.39
 -13  15   3  381.17   16.72
 -13  15   4   19.95    5.26
 -13  15   5  594.23   22.25
 -13  15   6   25.43    6.38
 -13  15   7  413.31   21.44
 -13  15   8   17.38    4.41
 -13  15   9  265.74   15.47
 -13  15  10   10.32    6.28
 -13  15  11  114.50   14.39
 -13  16  -2    2.67    5.11
 -13  16  -1  394.72   26.79
 -13  16   0   17.38    7.43
 -13  16   1  379.47   26.03
 -13  16   2   10.12    6.47
 -13  16   3  179.43   12.26
 -13  16   4    1.90    3.28
 -13  16   5   13.31    3.78
 -13  16   6    4.49    4.80
 -13  16   7   11.10    4.54
 -13  16   8   12.96    4.27
 -13  16   9   47.97   11.20
 -13  17   2   17.08    4.63
 -13  17   3   76.21   14.09
 -13  17   4   51.13    9.88
 -13  17   5  209.42   13.67
 -12   0 -10   66.59   10.19
 -12   0  -8   12.39    3.53
 -12   0  -6    1.66    3.19
 -12   0  -4  655.40   25.21
 -12   0  -2  907.47   29.50
 -12   0   0  273.19   16.99
 -12   0   2  319.07   10.51
 -12   0   4  137.06    5.49
 -12   0   6    2.90    3.81
 -12   0   8    0.69    1.91
 -12   0  10    0.68    2.33
 -12   0  12    0.93    4.90
 -12   0  14    3.14    5.80
 -12   0  16   16.46    6.82
 -12   0  18    0.24    6.53
 -12   0  20   17.31    4.85
 -12   1 -11   14.28    4.13
 -12   1 -10  374.90   18.28
 -12   1  -9   20.06    3.96
 -12   1  -8  576.66   18.92
 -12   1  -7   40.77    5.60
 -12   1  -6  611.20   19.26
 -12   1  -5  127.91    9.03
 -12   1  -4  692.88   17.89
 -12   1  -3  168.15    6.87
 -12   1  -2   51.91    2.92
 -12   1  -1  179.04    5.31
 -12   1   0   16.63    2.01
 -12   1   1  143.53    5.32
 -12   1   2   76.89    3.53
 -12   1   3   97.79    3.77
 -12   1   4  146.98    3.23
 -12   1   5    6.36    1.10
 -12   1   6  175.50    5.85
 -12   1   7    0.06    1.09
 -12   1   8   60.41    3.06
 -12   1   9   14.63    3.05
 -12   1  10    8.38    2.41
 -12   1  11   42.47   10.42
 -12   1  12    0.16    3.20
 -12   1  13   48.08    6.24
 -12   1  14    2.62    3.97
 -12   1  15   38.24    5.71
 -12   1  16    0.34    4.91
 -12   1  17   17.38    6.69
 -12   1  18    0.10    4.97
 -12   1  19   11.48    4.21
 -12   1  20    9.00    3.46
 -12   1  21    1.09    4.45
 -12   2 -11  170.67   10.99
 -12   2 -10   23.15    4.72
 -12   2  -9  112.94    8.42
 -12   2  -8   13.42    3.96
 -12   2  -7  133.14    8.63
 -12   2  -6  106.83    7.88
 -12   2  -5   91.57    6.58
 -12   2  -4  488.49   13.70
 -12   2  -3    3.37    1.91
 -12   2  -2  371.57   14.52
 -12   2  -1  260.61    7.89
 -12   2   0   70.72    3.36
 -12   2   1  234.69    5.99
 -12   2   2   73.04    3.21
 -12   2   3  353.69    8.68
 -12   2   4    0.55    1.16
 -12   2   5  514.29    8.14
 -12   2   6   43.30    3.39
 -12   2   7  516.15   11.32
 -12   2   8   96.50    5.36
 -12   2   9  240.31    7.14
 -12   2  10  115.56    4.56
 -12   2  11  158.53   17.50
 -12   2  12  104.46    8.40
 -12   2  13    0.41    2.87
 -12   2  14   63.04    6.96
 -12   2  15    1.26    3.29
 -12   2  16    0.50    4.63
 -12   2  17    6.52    3.32
 -12   2  18   17.96    8.41
 -12   2  19   12.42    5.23
 -12   2  20   25.73   11.04
 -12   2  21   35.94    5.98
 -12   3 -11   18.75    5.90
 -12   3 -10   92.99    8.28
 -12   3  -9   84.47    7.73
 -12   3  -8  110.70    9.21
 -12   3  -7  125.90    9.73
 -12   3  -6   13.04    2.20
 -12   3  -5  209.67    8.07
 -12   3  -4   26.33    2.74
 -12   3  -3  444.46   12.58
 -12   3  -2   83.17    4.87
 -12   3  -1  622.07   13.80
 -12   3   0  290.67    9.43
 -12   3   1  175.39    4.62
 -12   3   2  555.91    8.92
 -12   3   3  103.03    3.30
 -12   3   4  470.12    7.86
 -12   3   5   21.59    4.15
 -12   3   6  145.98    7.08
 -12   3   7    0.73    7.50
 -12   3   8    2.53    4.91
 -12   3   9   50.09    9.07
 -12   3  10   30.48    3.03
 -12   3  11  155.67   10.55
 -12   3  12  234.35   22.72
 -12   3  13  219.77   13.24
 -12   3  14  442.49   41.45
 -12   3  15  295.03   30.30
 -12   3  16  171.74   12.73
 -12   3  17  204.88   20.30
 -12   3  18   39.41    6.76
 -12   3  19  101.01    9.54
 -12   3  20    2.49    3.67
 -12   3  21   12.28    5.28
 -12   4 -11   76.20    7.13
 -12   4 -10  109.22    8.27
 -12   4  -9   44.63    5.27
 -12   4  -8  260.14   17.53
 -12   4  -7   25.85    3.77
 -12   4  -6  285.17   10.78
 -12   4  -5    0.57    2.25
 -12   4  -4  449.40   12.08
 -12   4  -3    6.18    1.96
 -12   4  -2  357.25   10.23
 -12   4  -1   79.96    3.44
 -12   4   0    0.08    1.35
 -12   4   1   14.38    1.80
 -12   4   2   28.77    2.81
 -12   4   3   85.02    7.44
 -12   4   4  349.33   14.55
 -12   4   5  178.88    6.65
 -12   4   6 1125.12   28.07
 -12   4   7  249.92   10.28
 -12   4   8 1101.58   22.48
 -12   4   9   64.87    4.86
 -12   4  10  490.71   14.73
 -12   4  11   37.66    6.04
 -12   4  12  286.36   19.51
 -12   4  13    2.68    5.81
 -12   4  14  176.38   18.78
 -12   4  15   24.14    9.33
 -12   4  16   13.00    7.50
 -12   4  17   13.41    7.86
 -12   4  18   69.46   11.23
 -12   4  19   34.46    9.63
 -12   4  20  120.03   16.28
 -12   4  21   15.23    5.37
 -12   5 -11    0.09    4.11
 -12   5 -10    8.40    5.08
 -12   5  -9    3.30    2.91
 -12   5  -8   13.58    2.40
 -12   5  -7   11.97    2.53
 -12   5  -6    5.23    3.37
 -12   5  -5    0.30    2.24
 -12   5  -4  348.91   12.72
 -12   5  -3   22.07    3.23
 -12   5  -2  576.88   15.33
 -12   5  -1    9.39    1.65
 -12   5   0 1272.12   17.53
 -12   5   1   39.42    3.47
 -12   5   2 1282.21   19.69
 -12   5   3  108.78    5.88
 -12   5   4  669.24   14.65
 -12   5   5   29.35    3.04
 -12   5   6   96.65    4.01
 -12   5   7    6.04    2.54
 -12   5   8   49.56    5.43
 -12   5   9    0.19    2.29
 -12   5  10  323.45   12.40
 -12   5  11    0.03    3.91
 -12   5  12  670.28   31.06
 -12   5  13    1.62    6.37
 -12   5  14  969.84   40.11
 -12   5  15   22.53    8.68
 -12   5  16  578.66   30.96
 -12   5  17   17.18    6.49
 -12   5  18  261.29   22.04
 -12   5  19   12.20    7.90
 -12   5  20   65.88   12.83
 -12   6 -11   78.46    7.32
 -12   6 -10   38.88    5.87
 -12   6  -9   24.56    3.61
 -12   6  -8  107.08    7.09
 -12   6  -7    0.96    2.40
 -12   6  -6  226.50    9.67
 -12   6  -5   10.65    4.34
 -12   6  -4  292.21   10.70
 -12   6  -3   86.84    6.76
 -12   6  -2  254.03   11.69
 -12   6  -1  159.45    6.40
 -12   6   0    3.47    3.30
 -12   6   1  241.37    7.96
 -12   6   2  134.35    7.49
 -12   6   3  100.14    6.63
 -12   6   4  669.85   16.08
 -12   6   5  121.64    6.53
 -12   6   6 1071.30   22.56
 -12   6   7  131.44    7.89
 -12   6   8 1017.29   37.76
 -12   6   9   35.43    8.87
 -12   6  10  435.89   23.52
 -12   6  11    4.92    5.37
 -12   6  12  291.92   22.43
 -12   6  13   30.88    6.77
 -12   6  14  273.87   21.45
 -12   6  15    4.52    6.01
 -12   6  16   16.13    6.82
 -12   6  17    2.20    5.41
 -12   6  18   95.65   14.01
 -12   6  19   10.08    7.24
 -12   6  20  170.85   19.73
 -12   7 -11  136.09   15.32
 -12   7 -10  101.62   11.85
 -12   7  -9  163.48   10.73
 -12   7  -8   78.23    8.40
 -12   7  -7  220.65   15.29
 -12   7  -6   29.08    4.07
 -12   7  -5  288.03   13.71
 -12   7  -4   13.59    5.41
 -12   7  -3  381.76   14.79
 -12   7  -2   59.91    4.93
 -12   7  -1  246.21    8.40
 -12   7   0  314.04   10.27
 -12   7   1   69.74    3.90
 -12   7   2  582.40   14.44
 -12   7   3   18.82    2.98
 -12   7   4  480.37   13.02
 -12   7   5   26.76    4.57
 -12   7   6  114.01   10.19
 -12   7   7   95.21   10.41
 -12   7   8    0.45    3.32
 -12   7   9  110.73   11.78
 -12   7  10   35.24    8.67
 -12   7  11   97.66   12.07
 -12   7  12  206.76   17.28
 -12   7  13   76.76   12.22
 -12   7  14  301.09   23.41
 -12   7  15   78.06   12.95
 -12   7  16   91.58   12.95
 -12   7  17   64.83   10.86
 -12   7  18   65.91   12.74
 -12   7  19   31.66    8.28
 -12   7  20   19.81    7.22
 -12   8 -11  170.02   16.46
 -12   8 -10   17.57    4.69
 -12   8  -9   95.24   13.92
 -12   8  -8    6.94    3.98
 -12   8  -7    2.72    2.87
 -12   8  -6   97.22    9.28
 -12   8  -5    4.83    2.96
 -12   8  -4  426.20   16.89
 -12   8  -3   66.53   10.63
 -12   8  -2  565.96   25.48
 -12   8  -1  193.42    8.39
 -12   8   0  131.62    5.90
 -12   8   1  134.86    6.97
 -12   8   2   66.97    5.03
 -12   8   3  200.64    9.76
 -12   8   4    0.29    2.25
 -12   8   5  402.71   14.40
 -12   8   6   20.55    5.85
 -12   8   7  306.53   20.85
 -12   8   8   54.81    8.04
 -12   8   9   10.01    3.92
 -12   8  10   40.04    8.54
 -12   8  11   34.31    7.28
 -12   8  12   64.52    9.69
 -12   8  13   26.24    7.10
 -12   8  14   35.65    8.46
 -12   8  15    0.69    4.16
 -12   8  16    2.51    4.30
 -12   8  17    0.08    5.47
 -12   8  18    9.72    4.81
 -12   8  19    0.35    6.95
 -12   9 -11   96.97   12.73
 -12   9 -10  379.57   17.22
 -12   9  -9   62.04    7.23
 -12   9  -8  460.97   18.05
 -12   9  -7  154.45   10.59
 -12   9  -6  455.74   17.78
 -12   9  -5  154.74   10.79
 -12   9  -4  274.37   13.63
 -12   9  -3   70.45    7.44
 -12   9  -2   50.61    9.76
 -12   9  -1   19.55    2.54
 -12   9   0    0.68    3.45
 -12   9   1    2.13    2.77
 -12   9   2   57.97    5.92
 -12   9   3    6.60    4.70
 -12   9   4  225.33   11.86
 -12   9   5   35.09    5.04
 -12   9   6  293.42   19.11
 -12   9   7   99.80   10.16
 -12   9   8  103.42   12.01
 -12   9   9   17.31    4.56
 -12   9  10    4.08    5.13
 -12   9  11    4.48    4.35
 -12   9  12    0.07    4.09
 -12   9  13    1.81    3.88
 -12   9  14    0.33    4.39
 -12   9  15    0.15    3.90
 -12   9  16    0.04    5.43
 -12   9  17    0.01    4.46
 -12   9  18    0.03    6.99
 -12   9  19    0.48    5.70
 -12  10 -11    2.81    5.99
 -12  10 -10  114.11   10.74
 -12  10  -9    2.67    3.75
 -12  10  -8    6.26    3.57
 -12  10  -7   17.14    3.67
 -12  10  -6   45.23    6.87
 -12  10  -5   36.06    5.18
 -12  10  -4  182.30   11.14
 -12  10  -3   50.60    5.68
 -12  10  -2  305.91   14.52
 -12  10  -1   62.49    5.15
 -12  10   0  259.21   12.27
 -12  10   1   19.29    3.40
 -12  10   2  241.62   10.92
 -12  10   3    0.45    2.44
 -12  10   4  126.06    7.86
 -12  10   5   35.54    5.00
 -12  10   6   90.94    8.21
 -12  10   7    2.84    3.27
 -12  10   8   12.73    3.90
 -12  10   9   46.57    8.00
 -12  10  10   11.53    4.19
 -12  10  11    9.78    4.74
 -12  10  12    1.23    5.18
 -12  10  13    2.65    4.84
 -12  10  14    0.40    3.89
 -12  10  15    0.47    5.46
 -12  10  16    0.06    4.66
 -12  10  17    0.20    5.52
 -12  10  18    0.77    6.93
 -12  11 -11   15.59    4.61
 -12  11 -10  187.14   12.65
 -12  11  -9    1.69    3.14
 -12  11  -8  303.98   15.86
 -12  11  -7   11.19    3.80
 -12  11  -6  376.80   16.09
 -12  11  -5    6.83    3.36
 -12  11  -4  248.12   13.45
 -12  11  -3   84.34    7.69
 -12  11  -2   16.93    3.91
 -12  11  -1  154.90    8.49
 -12  11   0    0.15    2.82
 -12  11   1  197.67   10.83
 -12  11   2   33.97    5.20
 -12  11   3  123.54    9.19
 -12  11   4   92.19    8.90
 -12  11   5  107.34    6.94
 -12  11   6   43.60    6.43
 -12  11   7   10.30    4.53
 -12  11   8   40.07    5.87
 -12  11   9   34.28    6.87
 -12  11  10   11.58    5.65
 -12  11  11   68.74   10.36
 -12  11  12    0.92    4.84
 -12  11  13  111.93   14.62
 -12  11  14    2.88    4.97
 -12  11  15  106.53   13.93
 -12  11  16    0.00    3.91
 -12  11  17   68.00   12.12
 -12  11  18    1.00    4.41
 -12  12 -10    1.74    3.19
 -12  12  -9   75.54    8.16
 -12  12  -8   34.80    5.96
 -12  12  -7  147.64   11.12
 -12  12  -6   31.85    6.72
 -12  12  -5  140.22   10.45
 -12  12  -4   92.69    9.32
 -12  12  -3   35.45    7.09
 -12  12  -2  167.71   15.39
 -12  12  -1    1.01    2.48
 -12  12   0   76.56    6.22
 -12  12   1   72.47    6.72
 -12  12   2    4.92    2.90
 -12  12   3  274.39   13.01
 -12  12   4   39.64    5.07
 -12  12   5  426.91   17.31
 -12  12   6   72.19    8.18
 -12  12   7  448.13   24.23
 -12  12   8   88.73   12.13
 -12  12   9  415.45   24.78
 -12  12  10   45.84    8.89
 -12  12  11  110.03   12.65
 -12  12  12   18.78    7.03
 -12  12  13    5.78    4.79
 -12  12  14    4.44    5.71
 -12  12  15    0.29    4.64
 -12  12  16    3.06    5.93
 -12  12  17    6.08    4.64
 -12  13  -9    0.01    4.92
 -12  13  -8   25.36    5.43
 -12  13  -7   15.15    5.92
 -12  13  -6    4.76    3.21
 -12  13  -5   69.26    7.20
 -12  13  -4    0.46    2.99
 -12  13  -3  160.95   14.99
 -12  13  -2  117.63   13.60
 -12  13  -1  163.64   16.21
 -12  13   0  308.08   17.29
 -12  13   1  295.84   19.94
 -12  13   2  320.56   14.55
 -12  13   3  274.86   13.66
 -12  13   4  185.15   11.04
 -12  13   5  159.77   10.66
 -12  13   6   88.18   11.20
 -12  13   7   42.84    7.80
 -12  13   8   22.67    7.39
 -12  13   9   69.22   11.00
 -12  13  10   18.36    6.27
 -12  13  11  187.88   16.00
 -12  13  12   94.53   13.38
 -12  13  13  183.52   18.42
 -12  13  14  133.06   14.76
 -12  13  15  201.20   20.04
 -12  13  16  140.58   15.47
 -12  14  -8  115.69   10.45
 -12  14  -7   69.21    9.10
 -12  14  -6  178.48   12.44
 -12  14  -5   99.88    9.52
 -12  14  -4  205.09   18.32
 -12  14  -3   49.90    9.63
 -12  14  -2  104.13   11.32
 -12  14  -1    1.65    5.41
 -12  14   0    0.00    4.39
 -12  14   1    4.00    2.94
 -12  14   2   79.16    7.94
 -12  14   3   26.08    5.15
 -12  14   4  267.41   14.24
 -12  14   5  100.98   10.05
 -12  14   6  325.41   22.92
 -12  14   7  192.53   12.05
 -12  14   8  409.65   24.69
 -12  14   9  216.99   17.92
 -12  14  10  279.72   21.16
 -12  14  11  113.57   13.99
 -12  14  12   75.71   12.47
 -12  14  13   26.13    8.17
 -12  14  14   15.25    6.98
 -12  14  15    0.06    5.08
 -12  15  -7   61.34    8.13
 -12  15  -6   16.27    4.16
 -12  15  -5   30.62    5.01
 -12  15  -4  101.10   13.64
 -12  15  -3    3.34    5.70
 -12  15  -2  342.85   23.93
 -12  15  -1    0.98    5.79
 -12  15   0  445.98   18.10
 -12  15   1   22.37    7.17
 -12  15   2  413.21   16.68
 -12  15   3   48.54    6.34
 -12  15   4  287.34   14.28
 -12  15   5   29.24    6.96
 -12  15   6   27.97    6.15
 -12  15   7   33.30    5.13
 -12  15   8   23.09    5.46
 -12  15   9   15.66    6.95
 -12  15  10  116.82   13.22
 -12  15  11    0.09    4.68
 -12  15  12  241.46   20.88
 -12  15  13   34.23   10.20
 -12  15  14  306.88   23.61
 -12  16  -5   16.46    8.31
 -12  16  -4  121.18   15.22
 -12  16  -3   43.53   10.21
 -12  16  -2   60.20   11.93
 -12  16  -1  140.18   17.08
 -12  16   0    0.81    5.52
 -12  16   1  125.19    9.68
 -12  16   2   14.34    4.21
 -12  16   3   69.34    7.68
 -12  16   4  287.33   15.11
 -12  16   5   36.80    6.74
 -12  16   6  382.99   19.89
 -12  16   7   24.92    5.28
 -12  16   8  297.83   24.44
 -12  16   9    1.05    5.15
 -12  16  10  218.13   19.49
 -12  16  11    0.01    4.75
 -12  16  12   82.81   12.04
 -12  17  -3  133.27   15.14
 -12  17  -2   28.28    7.08
 -12  17  -1   54.26    9.64
 -12  17   0  101.77   13.15
 -12  17   1    0.01    3.08
 -12  17   2  144.72   10.85
 -12  17   3    2.28    2.94
 -12  17   4   97.04    8.71
 -12  17   5   14.83    4.48
 -12  17   6   49.35    7.52
 -12  17   7   33.15    5.52
 -12  17   8    2.18    3.38
 -12  17   9   32.07    5.66
 -12  17  10   17.37    6.83
 -12  18   0  122.84   14.54
 -12  18   1  203.01   13.49
 -12  18   2   46.59    7.22
 -12  18   3  198.60   14.92
 -12  18   4    3.24    7.11
 -12  18   5   42.71    6.66
 -12  18   6    0.08    3.37
 -12  18   7   19.52    4.96
 -11   0  -9  779.32   32.35
 -11   0  -7  712.36   31.03
 -11   0  -5 3366.82   66.88
 -11   0  -3 1062.33   22.79
 -11   0  -1  164.09    7.45
 -11   0   1    6.14    1.76
 -11   0   3   10.04    2.56
 -11   0   5  391.99   13.42
 -11   0   7  642.53   14.13
 -11   0   9  553.88   21.83
 -11   0  11  399.77   22.51
 -11   0  13  119.39   11.21
 -11   0  15   34.23    7.13
 -11   0  17    0.31    5.83
 -11   0  19    6.22    6.25
 -11   0  21   49.17   10.76
 -11   1 -10   12.35    5.64
 -11   1  -9  271.97   13.46
 -11   1  -8    1.55    2.80
 -11   1  -7  142.96   11.24
 -11   1  -6   18.48    4.86
 -11   1  -5    7.63    2.61
 -11   1  -4    0.02    1.77
 -11   1  -3  585.58   12.47
 -11   1  -2  139.11    5.12
 -11   1  -1 1130.09   17.91
 -11   1   0  180.05    3.46
 -11   1   1 1290.80   18.44
 -11   1   2  132.98    3.38
 -11   1   3 1201.56   16.65
 -11   1   4  179.28    4.27
 -11   1   5  410.88    8.59
 -11   1   6  231.23    5.41
 -11   1   7   80.96    2.91
 -11   1   8  144.22    4.06
 -11   1   9    0.13    1.08
 -11   1  10   79.75    6.69
 -11   1  11  110.19   11.70
 -11   1  12    1.54    6.74
 -11   1  13  189.62   12.05
 -11   1  14    1.55    5.54
 -11   1  15  155.19   12.06
 -11   1  16    7.62    4.83
 -11   1  17   92.54    9.01
 -11   1  18   27.58    5.48
 -11   1  19   17.35    3.94
 -11   1  20   21.83    5.03
 -11   1  21    0.19    5.29
 -11   1  22    4.45    5.63
 -11   2 -10  124.46    9.14
 -11   2  -9  346.50   14.47
 -11   2  -8  147.90    9.64
 -11   2  -7  838.64   21.90
 -11   2  -6  132.56    6.45
 -11   2  -5 1345.95   31.58
 -11   2  -4  153.22    7.13
 -11   2  -3   46.45    3.29
 -11   2  -2  541.98   13.41
 -11   2  -1   10.58    1.01
 -11   2   0  201.61    3.76
 -11   2   1    2.78    0.81
 -11   2   2  218.47    4.05
 -11   2   3  168.41    4.05
 -11   2   4   29.06    1.43
 -11   2   5  620.85   12.08
 -11   2   6    7.74    2.04
 -11   2   7  438.75    7.99
 -11   2   8   90.74    4.80
 -11   2   9  158.64    5.11
 -11   2  10  158.50    5.63
 -11   2  11   95.58    4.94
 -11   2  12  302.45   13.65
 -11   2  13   39.96    4.90
 -11   2  14  184.32   11.73
 -11   2  15    7.78    6.77
 -11   2  16  146.11   10.91
 -11   2  17  136.53   12.19
 -11   2  18   50.84   10.81
 -11   2  19   56.40    7.82
 -11   2  20    2.70    3.48
 -11   2  21    9.92    3.49
 -11   2  22    0.02    3.94
 -11   3 -10   86.86    8.12
 -11   3  -9   98.04    8.42
 -11   3  -8   91.49   13.48
 -11   3  -7    3.51    3.07
 -11   3  -6    0.28    2.63
 -11   3  -5   59.29    4.81
 -11   3  -4   31.68    2.77
 -11   3  -3  230.33    8.45
 -11   3  -2   17.42    1.67
 -11   3  -1   83.60    2.67
 -11   3   0   93.07    3.32
 -11   3   1  133.15    4.04
 -11   3   2  364.40    7.29
 -11   3   3  248.67    5.50
 -11   3   4  506.86    9.75
 -11   3   5    0.26    1.29
 -11   3   6  495.64   12.43
 -11   3   7  195.88    8.16
 -11   3   8  205.60    9.30
 -11   3   9  247.20   12.63
 -11   3  10  169.01    4.80
 -11   3  11  314.46   10.55
 -11   3  12   36.47    7.12
 -11   3  13  459.85   35.47
 -11   3  14    2.53    3.93
 -11   3  15  168.21   11.24
 -11   3  16   32.52    5.50
 -11   3  17    0.46    3.78
 -11   3  18   23.94    5.99
 -11   3  19   25.90   10.38
 -11   3  20   38.53    7.12
 -11   3  21   33.36    7.17
 -11   3  22   78.53   12.58
 -11   4 -10    3.95    4.98
 -11   4  -9    0.68    3.00
 -11   4  -8   53.40    7.12
 -11   4  -7   12.07    2.61
 -11   4  -6   88.34    6.42
 -11   4  -5   12.25    4.40
 -11   4  -4   17.35    4.38
 -11   4  -3   13.75    2.69
 -11   4  -2   77.05    5.09
 -11   4  -1  105.46    3.81
 -11   4   0   57.93    2.26
 -11   4   1  236.63    5.64
 -11   4   2  146.46    6.27
 -11   4   3  197.12    4.54
 -11   4   4   10.25    2.20
 -11   4   5  156.29    5.55
 -11   4   6   30.83    3.24
 -11   4   7   45.84    4.00
 -11   4   8    0.59    1.99
 -11   4   9    0.01    4.26
 -11   4  10    8.65    2.25
 -11   4  11   48.19    9.34
 -11   4  12  157.23    7.60
 -11   4  13  343.83   21.95
 -11   4  14  130.27   10.72
 -11   4  15  427.54   17.44
 -11   4  16   78.26    7.43
 -11   4  17  289.64   15.62
 -11   4  18   49.23    6.86
 -11   4  19  192.96   12.92
 -11   4  20   27.55    9.02
 -11   4  21   66.47   12.49
 -11   4  22    6.12    6.43
 -11   5 -10    1.01    3.01
 -11   5  -9    0.11    3.42
 -11   5  -8    1.16    2.14
 -11   5  -7    3.17    2.11
 -11   5  -6   32.01    3.48
 -11   5  -5   54.93    5.07
 -11   5  -4    5.46    3.49
 -11   5  -3   40.40    4.36
 -11   5  -2    0.32    1.26
 -11   5  -1  267.01    7.10
 -11   5   0   92.86    3.65
 -11   5   1  108.35    3.43
 -11   5   2   81.97    3.46
 -11   5   3   25.25    1.32
 -11   5   4   12.40    2.17
 -11   5   5  222.26   10.54
 -11   5   6    4.18    2.17
 -11   5   7  441.58   21.26
 -11   5   8    0.14    3.70
 -11   5   9  554.93   24.91
 -11   5  10    2.66    4.12
 -11   5  11  628.13   27.31
 -11   5  12    0.07    6.38
 -11   5  13  444.54   23.89
 -11   5  14    5.81    5.03
 -11   5  15    8.82    4.93
 -11   5  16    0.78    4.27
 -11   5  17   34.88   10.01
 -11   5  18    0.02    4.11
 -11   5  19   54.45   10.63
 -11   5  20    6.53    6.39
 -11   5  21  106.25   15.60
 -11   6 -10   28.46    4.99
 -11   6  -9    1.58    2.29
 -11   6  -8  179.91    8.52
 -11   6  -7   56.95    4.11
 -11   6  -6  271.71   10.77
 -11   6  -5   14.53    3.01
 -11   6  -4  119.16    7.20
 -11   6  -3   53.82    3.05
 -11   6  -2  120.88    5.39
 -11   6  -1    0.27    1.77
 -11   6   0  215.67    9.44
 -11   6   1  289.97   12.28
 -11   6   2   17.27    2.58
 -11   6   3  331.36    9.75
 -11   6   4  108.54    7.43
 -11   6   5   64.82   10.14
 -11   6   6  227.80   14.35
 -11   6   7   54.92    8.38
 -11   6   8  119.41   11.71
 -11   6   9   10.23    4.63
 -11   6  10  101.42   11.36
 -11   6  11    5.98    4.40
 -11   6  12  198.06   15.95
 -11   6  13  194.12   16.63
 -11   6  14  108.73   12.89
 -11   6  15  260.54   20.40
 -11   6  16   16.12    6.03
 -11   6  17  237.84   19.90
 -11   6  18    1.42    4.76
 -11   6  19  190.59   19.48
 -11   6  20    1.67    6.88
 -11   6  21  104.25   14.74
 -11   7 -10  158.79   15.16
 -11   7  -9   27.86    5.26
 -11   7  -8   43.65    5.28
 -11   7  -7   23.98    4.22
 -11   7  -6    5.26    2.69
 -11   7  -5   10.48    3.49
 -11   7  -4   97.54    4.43
 -11   7  -3  246.37    7.36
 -11   7  -2  361.07    9.86
 -11   7  -1  239.26    9.41
 -11   7   0  429.43   11.09
 -11   7   1  328.51    8.80
 -11   7   2  654.79   17.20
 -11   7   3  164.60    8.56
 -11   7   4  822.46   19.40
 -11   7   5    2.73    3.94
 -11   7   6  515.35   22.46
 -11   7   7  115.27    9.93
 -11   7   8  126.31   11.89
 -11   7   9  112.07   11.44
 -11   7  10   40.58    7.42
 -11   7  11  286.75   19.29
 -11   7  12    3.47    4.15
 -11   7  13  446.32   24.32
 -11   7  14  127.44   15.25
 -11   7  15  127.85   14.88
 -11   7  16   86.73   12.48
 -11   7  17   10.18    6.06
 -11   7  18   53.52   10.53
 -11   7  19    6.07    4.19
 -11   7  20   48.64   10.97
 -11   7  21   39.91   11.27
 -11   8 -10  119.97    8.87
 -11   8  -9  266.55   13.56
 -11   8  -8  268.28   14.49
 -11   8  -7  547.42   19.54
 -11   8  -6  514.99   19.47
 -11   8  -5  560.38   19.02
 -11   8  -4  533.39   12.15
 -11   8  -3  231.54    8.25
 -11   8  -2  508.85   13.57
 -11   8  -1   17.85    5.54
 -11   8   0   99.84    5.54
 -11   8   1    8.27    2.84
 -11   8   2   41.00    4.47
 -11   8   3   93.35    5.91
 -11   8   4    8.76    3.08
 -11   8   5  627.24   26.83
 -11   8   6  198.12   14.36
 -11   8   7  493.54   23.17
 -11   8   8  453.95   23.06
 -11   8   9   70.93   10.12
 -11   8  10  349.68   21.48
 -11   8  11  119.52   10.72
 -11   8  12  311.38   18.61
 -11   8  13   42.14   10.22
 -11   8  14  157.25   15.62
 -11   8  15   12.26    6.51
 -11   8  16   56.49   10.92
 -11   8  17   17.90    5.95
 -11   8  18    2.45    5.05
 -11   8  19   52.80   10.75
 -11   8  20    0.01    4.96
 -11   9 -10  122.47   13.20
 -11   9  -9  189.45   11.05
 -11   9  -8   18.17    4.27
 -11   9  -7   40.25    7.40
 -11   9  -6    1.30    3.21
 -11   9  -5  113.14    8.38
 -11   9  -4    1.16    2.03
 -11   9  -3  741.65   15.57
 -11   9  -2  122.16    5.72
 -11   9  -1  813.39   42.91
 -11   9   0  347.35   14.39
 -11   9   1  822.94   33.49
 -11   9   2  204.48    9.75
 -11   9   3  737.74   31.37
 -11   9   4   77.67   11.83
 -11   9   5  566.96   37.02
 -11   9   6  212.66   14.32
 -11   9   7  175.47   13.64
 -11   9   8   61.44    7.97
 -11   9   9    8.96    4.39
 -11   9  10    0.47    3.89
 -11   9  11   90.81   11.05
 -11   9  12    5.31    4.01
 -11   9  13  113.48   14.32
 -11   9  14    6.68    4.08
 -11   9  15  128.19   15.25
 -11   9  16    9.52    5.81
 -11   9  17   63.24   10.26
 -11   9  18   17.98    5.85
 -11   9  19   13.44    5.66
 -11   9  20    3.30    4.65
 -11  10 -10    0.02    5.32
 -11  10  -9  541.92   20.55
 -11  10  -8    7.62    5.71
 -11  10  -7  941.13   27.34
 -11  10  -6   60.85    7.65
 -11  10  -5 1252.64   29.85
 -11  10  -4   29.00    3.78
 -11  10  -3  636.94   23.82
 -11  10  -2    7.13    2.77
 -11  10  -1  142.08    8.42
 -11  10   0   25.99    4.21
 -11  10   1    0.01    2.23
 -11  10   2    1.40    4.20
 -11  10   3   55.42    8.02
 -11  10   4   22.91    4.52
 -11  10   5  207.40    9.86
 -11  10   6   33.53    6.55
 -11  10   7  727.87   29.30
 -11  10   8    5.22    5.24
 -11  10   9  575.79   27.72
 -11  10  10    0.09    4.06
 -11  10  11  381.39   21.56
 -11  10  12    0.15    4.88
 -11  10  13   75.34   10.41
 -11  10  14   17.95    6.74
 -11  10  15    9.82    5.10
 -11  10  16   14.69    6.31
 -11  10  17    0.45    4.63
 -11  10  18   13.02    5.74
 -11  10  19    0.46    6.80
 -11  11 -10    0.07    2.79
 -11  11  -9   99.94    9.93
 -11  11  -8    1.75    2.98
 -11  11  -7   12.17    3.20
 -11  11  -6    0.51    3.89
 -11  11  -5   45.10    6.84
 -11  11  -4    0.32    3.62
 -11  11  -3  326.94   12.45
 -11  11  -2   29.61    4.98
 -11  11  -1  697.71   19.45
 -11  11   0   49.07    4.86
 -11  11   1  995.22   24.13
 -11  11   2    5.93    3.18
 -11  11   3  692.13   19.94
 -11  11   4   42.56    6.99
 -11  11   5  275.53   13.01
 -11  11   6  174.82   13.78
 -11  11   7   41.64    8.51
 -11  11   8  169.99   14.34
 -11  11   9    1.04    4.23
 -11  11  10   68.78   11.23
 -11  11  11   83.18   10.51
 -11  11  12   23.56    5.21
 -11  11  13   93.91   12.09
 -11  11  14    9.03    5.30
 -11  11  15   83.35   11.93
 -11  11  16    2.31    6.39
 -11  11  17   29.44    8.11
 -11  11  18   12.83    5.60
 -11  11  19   15.84    7.55
 -11  12 -10   69.37    7.79
 -11  12  -9  197.56   21.24
 -11  12  -8   28.68    4.74
 -11  12  -7  315.43   22.04
 -11  12  -6   38.40    5.64
 -11  12  -5  528.29   19.87
 -11  12  -4  111.34   13.45
 -11  12  -3  126.11    8.45
 -11  12  -2   98.30   10.10
 -11  12  -1    7.46    2.39
 -11  12   0  105.50    7.94
 -11  12   1    7.69    3.23
 -11  12   2   97.43    7.50
 -11  12   3  111.15    7.87
 -11  12   4  178.98   10.56
 -11  12   5  261.92   13.12
 -11  12   6  191.06   15.93
 -11  12   7  232.58   17.45
 -11  12   8    2.58    4.18
 -11  12   9   57.58    8.53
 -11  12  10  145.88   14.68
 -11  12  11   56.29   10.15
 -11  12  12  130.29   13.80
 -11  12  13    4.64    4.31
 -11  12  14  125.97   13.44
 -11  12  15   21.48    8.95
 -11  12  16  160.14   17.64
 -11  12  17   46.09   10.95
 -11  12  18  140.35   16.46
 -11  13 -10    0.07    3.56
 -11  13  -9    5.13    3.46
 -11  13  -8    0.05    3.65
 -11  13  -7    0.28    3.07
 -11  13  -6    1.45    3.33
 -11  13  -5    6.12    3.86
 -11  13  -4    1.62    3.61
 -11  13  -3   39.49    6.52
 -11  13  -2   21.30    3.27
 -11  13  -1   44.53    5.55
 -11  13   0   21.61    4.53
 -11  13   1   29.08    4.57
 -11  13   2   86.01    7.62
 -11  13   3    3.54    2.79
 -11  13   4  154.37    9.01
 -11  13   5   43.42    5.46
 -11  13   6  118.62    9.89
 -11  13   7  239.08   17.04
 -11  13   8  171.60   14.87
 -11  13   9  175.41   15.89
 -11  13  10  203.96   18.99
 -11  13  11   76.63   10.10
 -11  13  12   85.39    9.94
 -11  13  13   39.23    9.67
 -11  13  14    4.49    6.54
 -11  13  15   64.60   11.07
 -11  13  16    3.10    6.15
 -11  13  17    8.55    6.72
 -11  14 -10    3.90    3.44
 -11  14  -9   11.30    4.64
 -11  14  -8    4.84    2.94
 -11  14  -7    0.08    3.81
 -11  14  -6    0.14    9.77
 -11  14  -5    0.74    5.27
 -11  14  -4    0.00    5.82
 -11  14  -3   29.07    4.28
 -11  14  -2    0.13    2.82
 -11  14  -1   53.38    5.16
 -11  14   0   41.16    5.57
 -11  14   1  176.96   10.96
 -11  14   2  111.97   12.22
 -11  14   3  193.53   18.16
 -11  14   4   11.74    3.75
 -11  14   5   52.85    5.87
 -11  14   6   18.14    3.80
 -11  14   7   30.26    8.08
 -11  14   8   16.33    6.09
 -11  14   9    2.24    3.88
 -11  14  10    1.47    5.31
 -11  14  11   78.45   10.34
 -11  14  12   24.88    6.28
 -11  14  13  137.69   17.53
 -11  14  14   86.38   13.02
 -11  14  15  161.86   16.71
 -11  14  16   78.23   13.11
 -11  15  -9    0.28    3.33
 -11  15  -8    3.37    3.02
 -11  15  -7    0.05    3.45
 -11  15  -6    1.83    4.59
 -11  15  -5    0.04    4.66
 -11  15  -4    1.07    5.15
 -11  15  -3   14.54    7.17
 -11  15  -2   97.70    8.30
 -11  15  -1   26.34    4.69
 -11  15   0  136.46    9.68
 -11  15   1    1.81    2.58
 -11  15   2   94.47    8.34
 -11  15   3   53.32    6.04
 -11  15   4   37.39    4.89
 -11  15   5  155.22    9.73
 -11  15   6    3.82    3.75
 -11  15   7  200.53   13.00
 -11  15   8    0.63    4.54
 -11  15   9  227.73   18.84
 -11  15  10    9.41    5.50
 -11  15  11  212.31   18.39
 -11  15  12   41.72    8.95
 -11  15  13  111.85   14.58
 -11  15  14   58.63   10.16
 -11  15  15    9.24    7.32
 -11  16  -8  264.41   15.54
 -11  16  -7   10.38    6.03
 -11  16  -6  306.65   23.41
 -11  16  -5    5.07    5.81
 -11  16  -4  212.93   20.24
 -11  16  -3    0.07    5.56
 -11  16  -2  150.41   14.68
 -11  16  -1   16.81    4.48
 -11  16   0   45.80    6.36
 -11  16   1   55.57    9.49
 -11  16   2   11.78    4.47
 -11  16   3   78.88    8.30
 -11  16   4  103.54    8.70
 -11  16   5   37.88    5.72
 -11  16   6  217.99   13.72
 -11  16   7   23.39    4.60
 -11  16   8  217.74   18.68
 -11  16   9    9.81    5.45
 -11  16  10  154.44   14.05
 -11  16  11   10.72    6.54
 -11  16  12   84.25   12.77
 -11  16  13  121.69   14.32
 -11  16  14   40.09    9.81
 -11  17  -6    3.11    5.54
 -11  17  -5    6.25    5.78
 -11  17  -4   32.93    9.17
 -11  17  -3   43.95    8.69
 -11  17  -2  197.14   18.26
 -11  17  -1   64.08    8.24
 -11  17   0  527.32   47.52
 -11  17   1   94.01    9.16
 -11  17   2  738.58   24.76
 -11  17   3   13.42    5.12
 -11  17   4  461.09   19.06
 -11  17   5    4.11    5.87
 -11  17   6  185.11   12.75
 -11  17   7    7.44    4.25
 -11  17   8   20.06    4.94
 -11  17   9   13.43    4.33
 -11  17  10    0.06    5.17
 -11  17  11   30.99    8.62
 -11  17  12    0.51    5.19
 -11  18  -4  286.11   22.40
 -11  18  -3  107.70   13.84
 -11  18  -2  170.90   18.27
 -11  18  -1   35.05    6.36
 -11  18   0   54.48    7.33
 -11  18   1    0.76    2.93
 -11  18   2    2.88    3.73
 -11  18   3   39.63    5.96
 -11  18   4   64.26    7.45
 -11  18   5  141.13   11.94
 -11  18   6  175.46   12.18
 -11  18   7  179.85   13.19
 -11  18   8  183.59   13.07
 -11  18   9  140.06   15.94
 -11  18  10  169.52   17.86
 -11  19  -1  296.87   27.86
 -11  19   0  219.64   23.27
 -11  19   1  382.05   22.80
 -11  19   2  280.15   16.34
 -11  19   3  235.52   15.04
 -11  19   4  110.97   10.20
 -11  19   5  203.40   13.98
 -11  19   6   53.94    7.87
 -11  19   7   54.52    7.13
 -11  19   8    6.44    3.64
 -10   0  -8  306.40   17.84
 -10   0  -6  212.41   12.86
 -10   0  -4  359.60   14.13
 -10   0  -2  842.75   28.51
 -10   0   0 2099.01   32.99
 -10   0   2 2801.39   23.96
 -10   0   4 2732.29   53.57
 -10   0   6 1027.56   19.64
 -10   0   8  518.56   12.16
 -10   0  10   27.58    6.78
 -10   0  12   65.20    9.74
 -10   0  14  388.67   23.27
 -10   0  16  550.79   28.42
 -10   0  18  399.66   27.79
 -10   0  20  348.12   22.67
 -10   0  22   57.95   11.48
 -10   1  -9  134.02    8.37
 -10   1  -8  318.92   12.22
 -10   1  -7   85.16    6.64
 -10   1  -6  985.10   23.09
 -10   1  -5   24.63    3.31
 -10   1  -4  705.10   15.10
 -10   1  -3   62.21    3.38
 -10   1  -2  831.99   13.23
 -10   1  -1   26.69    2.13
 -10   1   0  548.02   13.02
 -10   1   1   30.21    2.19
 -10   1   2  180.66    5.25
 -10   1   3    5.92    0.92
 -10   1   4   55.26    2.90
 -10   1   5   59.60    2.65
 -10   1   6  393.33    7.66
 -10   1   7   27.40    2.21
 -10   1   8 1090.87   13.90
 -10   1   9   14.51    1.14
 -10   1  10 1086.88   28.37
 -10   1  11  105.05    8.40
 -10   1  12  786.77   23.40
 -10   1  13   90.94    8.12
 -10   1  14  233.34   12.54
 -10   1  15   60.37    7.70
 -10   1  16   28.17    5.49
 -10   1  17   47.56    5.95
 -10   1  18    0.27    3.92
 -10   1  19   23.29    6.21
 -10   1  20   31.39    5.74
 -10   1  21    3.50    5.19
 -10   1  22  107.29   10.55
 -10   1  23    5.21    6.78
 -10   2  -9   21.29    3.88
 -10   2  -8  618.02   26.50
 -10   2  -7  130.34    9.36
 -10   2  -6  453.88   15.30
 -10   2  -5  393.27   14.99
 -10   2  -4   60.97    3.48
 -10   2  -3  421.95   18.60
 -10   2  -2  234.37    9.23
 -10   2  -1  446.02    9.97
 -10   2   0  765.71    9.45
 -10   2   1  630.44   12.74
 -10   2   2 1023.01   16.46
 -10   2   3  531.74    6.46
 -10   2   4  792.39   13.81
 -10   2   5  349.48    9.43
 -10   2   6  362.65    9.49
 -10   2   7  106.42    4.77
 -10   2   8  166.79    6.12
 -10   2   9   53.84    4.62
 -10   2  10    2.76    1.24
 -10   2  11   26.34    1.61
 -10   2  12   48.15    4.99
 -10   2  13   47.32    9.75
 -10   2  14  246.85   26.44
 -10   2  15   68.75    7.26
 -10   2  16  373.87   42.19
 -10   2  17   98.30    8.99
 -10   2  18  104.45    9.84
 -10   2  19  112.14    9.94
 -10   2  20   24.64    7.31
 -10   2  21   85.55    9.06
 -10   2  22    3.72    4.56
 -10   2  23   44.33   12.66
 -10   3  -9  233.94   12.85
 -10   3  -8    3.91    2.39
 -10   3  -7  306.67   12.23
 -10   3  -6  189.57    7.68
 -10   3  -5   29.16    2.17
 -10   3  -4  114.90    4.07
 -10   3  -3    7.97    1.87
 -10   3  -2  291.19   19.33
 -10   3  -1   38.29    2.64
 -10   3   0  135.69    3.35
 -10   3   1   10.23    1.20
 -10   3   2   34.17    1.56
 -10   3   3   41.16    2.12
 -10   3   4    1.72    1.08
 -10   3   5  115.79   11.94
 -10   3   6   35.34    3.94
 -10   3   7  122.97    5.56
 -10   3   8  158.36    6.12
 -10   3   9  221.80   15.21
 -10   3  10  152.48    8.13
 -10   3  11  234.14    6.79
 -10   3  12   55.39    3.11
 -10   3  13  240.88    6.54
 -10   3  14    0.31    3.47
 -10   3  15  227.45   14.75
 -10   3  16   45.71    6.12
 -10   3  17   24.67    7.28
 -10   3  18  120.11    9.99
 -10   3  19    8.17    3.56
 -10   3  20   48.36    7.43
 -10   3  21    1.16    4.31
 -10   3  22   29.64    5.73
 -10   3  23    0.90    4.20
 -10   4  -9    0.93    3.52
 -10   4  -8  496.30   14.06
 -10   4  -7   67.33    4.73
 -10   4  -6  637.77   16.60
 -10   4  -5   66.62    3.74
 -10   4  -4  105.15    4.27
 -10   4  -3   42.51    6.18
 -10   4  -2    9.66    0.96
 -10   4  -1   42.72    1.90
 -10   4   0    0.89    0.89
 -10   4   1   25.75    1.58
 -10   4   2   10.43    0.59
 -10   4   3   12.31    1.06
 -10   4   4  110.94    3.22
 -10   4   5   53.52    4.55
 -10   4   6   10.58    1.87
 -10   4   7   60.63    7.22
 -10   4   8   28.24    5.34
 -10   4   9   42.14   10.11
 -10   4  10   20.27    5.87
 -10   4  11    7.72    3.47
 -10   4  12  102.71    9.08
 -10   4  13   48.87    5.64
 -10   4  14  227.84   12.89
 -10   4  15   25.91    5.04
 -10   4  16   20.85    4.28
 -10   4  17   12.22    4.23
 -10   4  18    0.03    7.66
 -10   4  19    8.15    3.02
 -10   4  20    2.34    3.99
 -10   4  21   21.75    5.31
 -10   4  22   48.71   10.40
 -10   5  -9   22.07    3.68
 -10   5  -8  223.10    9.64
 -10   5  -7   76.78    6.39
 -10   5  -6  105.22    5.82
 -10   5  -5    9.93    2.09
 -10   5  -4    2.66    1.83
 -10   5  -3    0.62    0.91
 -10   5  -2  244.66    4.46
 -10   5  -1   34.32    1.96
 -10   5   0  204.82    5.23
 -10   5   1   17.52    2.09
 -10   5   2  142.38    5.76
 -10   5   3    0.65    1.07
 -10   5   4  246.67   13.92
 -10   5   5    6.32    1.56
 -10   5   6   57.71    3.89
 -10   5   7  132.42   10.59
 -10   5   8    1.53    4.34
 -10   5   9  108.39   12.41
 -10   5  10   41.62    6.92
 -10   5  11   43.10    7.58
 -10   5  12   16.35    5.56
 -10   5  13   10.35    4.94
 -10   5  14   65.47   10.17
 -10   5  15    2.01    6.01
 -10   5  16  108.09   12.55
 -10   5  17    0.00    7.77
 -10   5  18  177.00   16.79
 -10   5  19    0.07    7.89
 -10   5  20   49.40    9.23
 -10   5  21    0.15    4.36
 -10   5  22   25.07    9.04
 -10   6  -9   11.37    2.07
 -10   6  -8  380.98   12.66
 -10   6  -7    0.74    2.20
 -10   6  -6  491.94   13.68
 -10   6  -5    6.09    0.89
 -10   6  -4  266.10    7.03
 -10   6  -3   14.29    1.69
 -10   6  -2    9.36    1.10
 -10   6  -1   44.54    3.15
 -10   6   0    2.62    1.09
 -10   6   1  132.89    4.94
 -10   6   2   43.50    3.17
 -10   6   3  239.27   10.54
 -10   6   4   21.21    5.43
 -10   6   5  158.55    8.61
 -10   6   6   26.41    1.46
 -10   6   7  144.95    6.08
 -10   6   8   12.79    1.97
 -10   6   9   38.17    5.90
 -10   6  10   17.70    6.82
 -10   6  11    1.42    4.10
 -10   6  12    6.41    4.72
 -10   6  13   34.73    5.88
 -10   6  14    9.10    3.89
 -10   6  15   85.69   11.07
 -10   6  16    0.18    6.00
 -10   6  17   63.14    9.92
 -10   6  18    0.17    5.93
 -10   6  19   39.02    8.48
 -10   6  20   19.11    6.48
 -10   6  21   20.25    7.78
 -10   6  22   49.76   11.25
 -10   7  -9  310.98   14.29
 -10   7  -8   16.58    4.37
 -10   7  -7  472.59   16.51
 -10   7  -6   69.66    3.69
 -10   7  -5  235.92    7.55
 -10   7  -4  282.81    7.94
 -10   7  -3  323.95    8.67
 -10   7  -2  554.86   10.28
 -10   7  -1  233.28    8.98
 -10   7   0  347.74   14.92
 -10   7   1   75.88    4.15
 -10   7   2   99.76    5.18
 -10   7   3   16.87    2.84
 -10   7   4    2.33    2.67
 -10   7   5  282.41   20.46
 -10   7   6   74.11    5.94
 -10   7   7  305.52   10.12
 -10   7   8   90.35    6.39
 -10   7   9  270.62   42.40
 -10   7  10  220.10   29.64
 -10   7  11  763.91   86.77
 -10   7  12   13.93    5.06
 -10   7  13  392.38   23.11
 -10   7  14   13.18    5.25
 -10   7  15  136.19   14.74
 -10   7  16    0.45    6.45
 -10   7  17   45.66    9.21
 -10   7  18   41.17    8.24
 -10   7  19    0.69    5.69
 -10   7  20   56.00   11.28
 -10   7  21   16.15    7.18
 -10   7  22   42.96   11.27
 -10   8  -9  108.40    9.05
 -10   8  -8  358.26   20.82
 -10   8  -7    8.00    8.36
 -10   8  -6  187.51    7.10
 -10   8  -5   35.15    3.05
 -10   8  -4    0.01    1.82
 -10   8  -3  163.75    6.94
 -10   8  -2  339.99    9.80
 -10   8  -1  407.03   19.79
 -10   8   0  413.20   10.98
 -10   8   1  685.41   18.81
 -10   8   2  427.70   13.78
 -10   8   3  499.47   24.12
 -10   8   4  598.57   17.83
 -10   8   5  206.92   15.84
 -10   8   6  472.01   15.72
 -10   8   7  250.32   26.87
 -10   8   8  175.56    7.06
 -10   8   9  105.52    8.09
 -10   8  10   20.00    8.15
 -10   8  11    8.72    6.14
 -10   8  12   84.48   12.61
 -10   8  13  107.41   11.52
 -10   8  14  259.93   18.34
 -10   8  15  101.47   12.54
 -10   8  16  169.85   17.40
 -10   8  17  114.18   14.00
 -10   8  18  138.51   15.25
 -10   8  19  117.11   15.99
 -10   8  20   53.39   12.39
 -10   8  21   75.36   12.79
 -10   9  -9   30.86    4.92
 -10   9  -8  292.86   13.37
 -10   9  -7  165.75   10.20
 -10   9  -6  733.09   31.08
 -10   9  -5  208.32   11.61
 -10   9  -4  842.69   17.15
 -10   9  -3  248.24    9.52
 -10   9  -2  555.85   14.88
 -10   9  -1  190.63    8.84
 -10   9   0  382.70   12.26
 -10   9   1   88.16    5.95
 -10   9   2   65.19    6.57
 -10   9   3    4.76    2.29
 -10   9   4   97.02    7.06
 -10   9   5   78.97   10.31
 -10   9   6  606.82   25.64
 -10   9   7  105.26   14.69
 -10   9   8  728.15   29.71
 -10   9   9  254.06   16.93
 -10   9  10 1275.80   44.31
 -10   9  11  530.56   28.34
 -10   9  12  664.44   28.98
 -10   9  13  146.18   14.15
 -10   9  14  376.42   24.30
 -10   9  15   61.62   10.78
 -10   9  16   61.09   10.78
 -10   9  17    5.66    6.10
 -10   9  18    5.10    5.36
 -10   9  19    0.83    4.64
 -10   9  20   45.32    9.76
 -10   9  21    6.79    5.73
 -10  10  -9   86.37    7.95
 -10  10  -8  439.62   18.77
 -10  10  -7   31.23    7.23
 -10  10  -6   34.98    4.25
 -10  10  -5   49.26    6.38
 -10  10  -4  145.47   12.72
 -10  10  -3   47.64    3.83
 -10  10  -2  483.24   15.90
 -10  10  -1    2.77    2.61
 -10  10   0 1217.06   26.09
 -10  10   1   39.00    4.61
 -10  10   2 1330.55   35.76
 -10  10   3  113.01   19.87
 -10  10   4 1191.61   25.87
 -10  10   5   51.89    7.98
 -10  10   6  795.43   29.84
 -10  10   7   11.65    5.52
 -10  10   8  409.65   22.48
 -10  10   9   12.70    5.44
 -10  10  10   23.69    5.67
 -10  10  11    2.53    4.16
 -10  10  12   69.48    8.52
 -10  10  13    6.63    4.62
 -10  10  14  238.30   18.05
 -10  10  15    7.34    5.25
 -10  10  16  389.49   25.76
 -10  10  17   41.81    9.66
 -10  10  18  220.24   20.47
 -10  10  19   19.69    8.39
 -10  10  20   87.05   14.23
 -10  11  -9  101.09    9.40
 -10  11  -8  361.45   23.65
 -10  11  -7   92.84    8.51
 -10  11  -6  904.99   25.79
 -10  11  -5   13.79    6.08
 -10  11  -4  827.85   33.26
 -10  11  -3    0.25    4.93
 -10  11  -2  425.88   14.71
 -10  11  -1   11.14    5.66
 -10  11   0  210.90    9.96
 -10  11   1   35.68    3.63
 -10  11   2   46.61    5.15
 -10  11   3   18.59    4.46
 -10  11   4   46.52    5.53
 -10  11   5   72.01    8.91
 -10  11   6  432.26   22.71
 -10  11   7    1.59    4.04
 -10  11   8  750.34   31.37
 -10  11   9   53.74    9.31
 -10  11  10  907.72   35.72
 -10  11  11    2.99    4.46
 -10  11  12  467.59   26.32
 -10  11  13   16.66    6.69
 -10  11  14  129.26   14.67
 -10  11  15   41.31    7.63
 -10  11  16    2.47    5.84
 -10  11  17   27.01    9.14
 -10  11  18    6.28    6.33
 -10  11  19   28.33    9.66
 -10  11  20   25.54    7.30
 -10  12  -9   88.83    9.65
 -10  12  -8  181.50   12.07
 -10  12  -7  125.84   15.21
 -10  12  -6   82.47    8.90
 -10  12  -5  233.48   18.26
 -10  12  -4    0.78    3.64
 -10  12  -3  307.35   20.73
 -10  12  -2   37.23    7.40
 -10  12  -1  367.16   14.14
 -10  12   0  226.29   14.52
 -10  12   1  284.74   12.50
 -10  12   2  308.79   13.24
 -10  12   3  124.30    8.78
 -10  12   4  431.03   16.24
 -10  12   5   35.52    4.87
 -10  12   6  141.62   11.91
 -10  12   7   40.94    7.57
 -10  12   8   21.03    6.05
 -10  12   9   43.45    6.81
 -10  12  10    1.85    3.92
 -10  12  11   35.78    8.84
 -10  12  12   21.57    6.03
 -10  12  13    0.34    4.39
 -10  12  14   91.78   11.92
 -10  12  15    0.71    4.78
 -10  12  16   88.87   12.61
 -10  12  17   13.22    6.08
 -10  12  18   49.71   10.39
 -10  12  19   35.82    9.39
 -10  13  -9  166.47   11.90
 -10  13  -8    2.10    3.32
 -10  13  -7  124.39    9.84
 -10  13  -6   46.69    8.91
 -10  13  -5   44.31    7.21
 -10  13  -4   84.27   11.50
 -10  13  -3   43.50    8.05
 -10  13  -2  175.73   15.65
 -10  13  -1    1.79    3.71
 -10  13   0  107.25    7.92
 -10  13   1   13.63    4.01
 -10  13   2    2.92    3.75
 -10  13   3   12.67    2.70
 -10  13   4   40.74    5.34
 -10  13   5   11.31    3.70
 -10  13   6   92.38    9.72
 -10  13   7   44.31    7.77
 -10  13   8  114.07   12.91
 -10  13   9   24.50    7.34
 -10  13  10   57.18    9.37
 -10  13  11   29.27    6.40
 -10  13  12    8.55    5.40
 -10  13  13   62.91    9.72
 -10  13  14    0.58    4.92
 -10  13  15   69.43   10.63
 -10  13  16   29.42    7.86
 -10  13  17   49.95   10.02
 -10  13  18   26.88    6.20
 -10  14  -9   51.92    7.63
 -10  14  -8  125.00   24.23
 -10  14  -7  104.66   13.02
 -10  14  -6  222.06   17.03
 -10  14  -5  115.41   13.34
 -10  14  -4  159.85   16.71
 -10  14  -3   25.24    7.52
 -10  14  -2   76.55   11.03
 -10  14  -1    3.44    4.74
 -10  14   0    0.47    5.28
 -10  14   1    7.05    3.41
 -10  14   2    0.74    2.77
 -10  14   3    0.90    2.83
 -10  14   4   29.54    5.16
 -10  14   5    1.34    3.42
 -10  14   6   40.98    7.99
 -10  14   7    3.73    3.53
 -10  14   8   29.32    6.76
 -10  14   9    0.01    3.94
 -10  14  10   45.05   10.37
 -10  14  11    3.84    4.56
 -10  14  12   48.58    7.84
 -10  14  13   16.25    4.63
 -10  14  14   44.58    8.38
 -10  14  15   16.39    5.89
 -10  14  16    8.52    4.20
 -10  14  17    0.19    5.05
 -10  15  -9   11.88    4.91
 -10  15  -8   85.66    8.90
 -10  15  -7   28.43    8.48
 -10  15  -6   34.08    7.86
 -10  15  -5   96.99   11.65
 -10  15  -4   10.02    5.05
 -10  15  -3  117.30   13.13
 -10  15  -2   11.26    4.97
 -10  15  -1   91.99   12.15
 -10  15   0   32.25    6.86
 -10  15   1   17.59    3.71
 -10  15   2   41.05    6.68
 -10  15   3    0.01    2.66
 -10  15   4   28.14    4.83
 -10  15   5   17.54    4.17
 -10  15   6    3.60    3.10
 -10  15   7   71.11    8.65
 -10  15   8    5.69    3.78
 -10  15   9  102.36   14.23
 -10  15  10    6.22    5.55
 -10  15  11  118.66   13.82
 -10  15  12   21.11    5.58
 -10  15  13   43.64    8.21
 -10  15  14   93.06   12.95
 -10  15  15    0.02    5.41
 -10  15  16   95.58   13.40
 -10  16  -9   75.18    8.15
 -10  16  -8  114.87   14.03
 -10  16  -7   24.06    7.70
 -10  16  -6  160.87   17.70
 -10  16  -5    5.33    4.30
 -10  16  -4   40.97    8.25
 -10  16  -3   26.30    8.60
 -10  16  -2    4.51    4.33
 -10  16  -1  168.38   16.49
 -10  16   0   14.49    7.09
 -10  16   1  473.93   19.52
 -10  16   2   10.87    4.36
 -10  16   3  537.91   20.67
 -10  16   4    7.89    4.62
 -10  16   5  346.72   15.70
 -10  16   6    0.03    3.00
 -10  16   7  126.25   14.60
 -10  16   8    5.84    5.69
 -10  16   9   26.47    7.27
 -10  16  10    0.66    4.40
 -10  16  11    0.16    4.59
 -10  16  12    7.89    4.23
 -10  16  13   39.81    8.74
 -10  16  14   17.37    6.75
 -10  16  15   84.98   11.93
 -10  17  -8    8.93    5.72
 -10  17  -7  320.94   24.34
 -10  17  -6   43.13    8.74
 -10  17  -5  285.90   22.63
 -10  17  -4   63.71    9.69
 -10  17  -3  211.68   19.20
 -10  17  -2   64.51   10.27
 -10  17  -1  289.19   20.60
 -10  17   0   43.63   10.77
 -10  17   1  101.53    9.39
 -10  17   2   25.45    4.13
 -10  17   3    4.21    3.58
 -10  17   4    1.98    8.64
 -10  17   5  100.76    9.35
 -10  17   6   48.86    7.75
 -10  17   7  300.82   15.60
 -10  17   8   80.23   12.76
 -10  17   9  373.12   25.89
 -10  17  10   83.64   12.71
 -10  17  11  348.39   24.67
 -10  17  12   44.30    9.45
 -10  17  13  250.81   22.70
 -10  17  14    3.70    6.11
 -10  18  -7   20.73    6.70
 -10  18  -6   20.38    7.10
 -10  18  -5    0.15    5.38
 -10  18  -4    0.24    6.43
 -10  18  -3   36.26    8.09
 -10  18  -2   37.80    7.33
 -10  18  -1  220.52   19.63
 -10  18   0  184.98   18.27
 -10  18   1  647.42   34.76
 -10  18   2  225.30   13.52
 -10  18   3  703.86   23.91
 -10  18   4  158.78   13.48
 -10  18   5  350.81   16.11
 -10  18   6  171.48   17.84
 -10  18   7  144.16   12.50
 -10  18   8  104.09   14.05
 -10  18   9   30.19    8.39
 -10  18  10    0.29    4.41
 -10  18  11    0.80    4.76
 -10  18  12   11.42    6.82
 -10  19  -5  147.00   17.22
 -10  19  -4  261.52   22.84
 -10  19  -3  122.23   14.92
 -10  19  -2  235.19   21.09
 -10  19  -1  102.19   14.38
 -10  19   0   74.13   12.01
 -10  19   1   84.52   12.92
 -10  19   2    6.39    3.46
 -10  19   3    8.12    3.79
 -10  19   4   48.43    6.71
 -10  19   5   35.34    7.18
 -10  19   6  238.71   15.54
 -10  19   7  106.72   10.00
 -10  19   8  296.78   21.77
 -10  19   9  136.46   17.00
 -10  19  10  320.56   25.61
 -10  20  -2  186.79   17.75
 -10  20  -1    8.88    6.34
 -10  20   0  442.40   29.29
 -10  20   1   36.72    9.03
 -10  20   2  372.35   18.39
 -10  20   3   74.74    9.60
 -10  20   4  463.95   20.06
 -10  20   5   39.68    6.88
 -10  20   6  278.52   16.58
 -10  20   7   61.63    8.02
 -10  20   8   84.59   11.51
  -9   0  -7   52.40    8.33
  -9   0  -5  401.32   15.16
  -9   0  -3  740.38   15.42
  -9   0  -1 1096.06   31.89
  -9   0   1  255.49    4.38
  -9   0   3  114.52    4.15
  -9   0   5   23.57    2.59
  -9   0   7  615.36   10.51
  -9   0   9 1734.21  274.33
  -9   0  11 1575.66   42.52
  -9   0  13  793.95   31.47
  -9   0  15  342.92   21.02
  -9   0  17  296.75   21.44
  -9   0  19   66.60   11.79
  -9   0  21   55.04   11.52
  -9   0  23  168.97   19.74
  -9   1  -8  144.85    8.52
  -9   1  -7   52.80    6.25
  -9   1  -6  278.93   10.11
  -9   1  -5    0.43    1.27
  -9   1  -4  413.99    8.10
  -9   1  -3    0.62    1.32
  -9   1  -2  551.14   10.27
  -9   1  -1  612.03   14.80
  -9   1   0  585.61    8.58
  -9   1   1 1091.55   10.10
  -9   1   2  134.08    2.83
  -9   1   3 1137.79   10.06
  -9   1   4   62.78    2.46
  -9   1   5  706.59    7.32
  -9   1   6   84.94    3.15
  -9   1   7 2107.05   18.87
  -9   1   8    8.31    0.79
  -9   1   9  621.83   23.32
  -9   1  10   12.62    2.06
  -9   1  11   21.25    3.59
  -9   1  12   88.72   11.23
  -9   1  13   81.25    6.91
  -9   1  14   39.31    6.22
  -9   1  15  392.77   17.73
  -9   1  16    4.35    4.90
  -9   1  17  425.66   18.97
  -9   1  18   47.55    6.57
  -9   1  19  509.96   21.66
  -9   1  20  121.75   10.29
  -9   1  21  276.45   26.35
  -9   1  22   22.61    5.98
  -9   1  23   79.78    9.54
  -9   2  -8  644.78   18.22
  -9   2  -7    0.17    3.30
  -9   2  -6   96.45    4.78
  -9   2  -5  113.29    5.31
  -9   2  -4   62.30    2.73
  -9   2  -3  147.55    5.20
  -9   2  -2   71.96    3.80
  -9   2  -1  778.42   11.46
  -9   2   0   68.69    2.32
  -9   2   1  777.00    8.68
  -9   2   2  264.95    5.17
  -9   2   3  393.40    6.44
  -9   2   4  206.97    5.31
  -9   2   5   30.95    1.54
  -9   2   6  196.22    5.58
  -9   2   7  214.70    7.01
  -9   2   8  431.02   10.71
  -9   2   9  453.44   19.83
  -9   2  10  394.88    8.26
  -9   2  11  346.55    9.87
  -9   2  12  201.20   11.20
  -9   2  13  454.14   24.06
  -9   2  14  124.69    7.32
  -9   2  15  409.36   17.15
  -9   2  16   87.77    9.51
  -9   2  17   56.42    5.91
  -9   2  18   42.70    5.27
  -9   2  19    5.68    3.96
  -9   2  20    5.47    6.89
  -9   2  21    9.37   11.39
  -9   2  22    7.03    7.59
  -9   2  23   59.13    8.35
  -9   3  -8  156.32    8.41
  -9   3  -7  658.50   19.97
  -9   3  -6  432.65   10.73
  -9   3  -5  750.50   11.89
  -9   3  -4  999.89   17.16
  -9   3  -3  641.94   14.09
  -9   3  -2  604.89   17.66
  -9   3  -1  352.33    5.24
  -9   3   0  806.62   14.09
  -9   3   1   82.12    2.15
  -9   3   2  380.30    5.27
  -9   3   3   68.52    2.58
  -9   3   4   71.00    1.14
  -9   3   5  144.57    3.58
  -9   3   6    1.00    2.01
  -9   3   7  334.24   33.50
  -9   3   8    0.08    7.70
  -9   3   9  349.23   13.80
  -9   3  10   18.82    3.54
  -9   3  11  304.03   13.19
  -9   3  12   65.97   12.78
  -9   3  13    9.40    3.06
  -9   3  14   49.02   11.75
  -9   3  15  108.76   14.31
  -9   3  16  106.90    9.74
  -9   3  17   24.20    5.44
  -9   3  18   71.43    8.12
  -9   3  19    0.98    4.97
  -9   3  20    7.64    4.02
  -9   3  21    0.02    3.55
  -9   3  22   26.97    5.98
  -9   3  23    0.61    5.07
  -9   4  -8  672.99   15.92
  -9   4  -7  402.48    8.76
  -9   4  -6  158.70    5.28
  -9   4  -5   79.06    3.91
  -9   4  -4   14.21    2.44
  -9   4  -3  180.09    5.30
  -9   4  -2   13.41    1.05
  -9   4  -1  775.48   10.36
  -9   4   0   11.04    1.38
  -9   4   1  804.28   16.56
  -9   4   2  106.66    3.58
  -9   4   3 1268.31   18.84
  -9   4   4  323.04    7.33
  -9   4   5  997.93   55.75
  -9   4   6  230.24   13.13
  -9   4   7  322.32   18.64
  -9   4   8   44.34    8.97
  -9   4   9   82.84    8.82
  -9   4  10    8.78    2.94
  -9   4  11    0.08    2.61
  -9   4  12  118.04    8.26
  -9   4  13   55.85   24.48
  -9   4  14  112.36    7.40
  -9   4  15   25.74    4.99
  -9   4  16    1.31    4.37
  -9   4  17    0.30    4.69
  -9   4  18    2.17    4.32
  -9   4  19    0.02    5.06
  -9   4  20    0.10    4.46
  -9   4  21    0.93    3.68
  -9   4  22    0.00    4.16
  -9   4  23    0.04    4.83
  -9   5  -8  130.43    7.21
  -9   5  -7  615.55   12.15
  -9   5  -6   54.86    1.94
  -9   5  -5 1207.06   13.80
  -9   5  -4   50.96    1.78
  -9   5  -3  731.26    8.93
  -9   5  -2    0.98    1.29
  -9   5  -1  837.17   10.86
  -9   5   0   30.30    2.07
  -9   5   1  445.82    9.50
  -9   5   2    1.22    1.15
  -9   5   3  106.61    5.25
  -9   5   4    1.12    0.46
  -9   5   5   20.57    4.44
  -9   5   6   29.80    2.94
  -9   5   7  208.04    6.08
  -9   5   8   22.65    5.98
  -9   5   9  286.87   18.69
  -9   5  10   11.22    4.07
  -9   5  11   91.53   11.39
  -9   5  12    9.57    4.33
  -9   5  13   20.17    7.21
  -9   5  14    3.70    3.60
  -9   5  15   26.68    6.27
  -9   5  16    5.61    4.37
  -9   5  17   18.37    5.94
  -9   5  18    0.74    6.90
  -9   5  19    0.48    7.70
  -9   5  20    0.09    6.02
  -9   5  21    0.01    6.86
  -9   5  22    0.46    4.94
  -9   5  23   32.98    8.78
  -9   6  -8  262.09   11.96
  -9   6  -7  369.81   11.12
  -9   6  -6  309.16    5.14
  -9   6  -5  235.16    5.35
  -9   6  -4   40.53    2.78
  -9   6  -3   56.78    4.41
  -9   6  -2   12.49    2.14
  -9   6  -1  497.89   10.31
  -9   6   0   22.04    2.40
  -9   6   1  617.07   12.92
  -9   6   2    8.25    2.27
  -9   6   3  806.95   11.06
  -9   6   4  102.19    5.83
  -9   6   5  666.60   29.25
  -9   6   6  423.55   13.95
  -9   6   7  122.29    7.45
  -9   6   8  220.22    9.73
  -9   6   9    9.44    1.97
  -9   6  10  102.78   11.38
  -9   6  11    4.70    4.58
  -9   6  12  112.65   12.44
  -9   6  13    0.07    4.50
  -9   6  14  111.44   13.96
  -9   6  15   23.05    7.08
  -9   6  16   26.82    4.61
  -9   6  17    7.56    4.46
  -9   6  18    1.09    8.07
  -9   6  19    0.09    7.47
  -9   6  20    7.51    4.51
  -9   6  21    0.09    8.17
  -9   6  22   16.42    5.36
  -9   7  -8   10.45    2.97
  -9   7  -7  247.53    7.80
  -9   7  -6  184.25    6.58
  -9   7  -5  494.91   10.68
  -9   7  -4  155.40    4.05
  -9   7  -3  262.51    9.28
  -9   7  -2  185.85    7.03
  -9   7  -1  302.68    7.98
  -9   7   0  237.41    7.01
  -9   7   1  100.71    4.85
  -9   7   2  526.84   12.39
  -9   7   3   35.21    6.51
  -9   7   4  159.29    7.90
  -9   7   5  300.92   14.64
  -9   7   6   35.48    2.13
  -9   7   7  348.90    8.82
  -9   7   8   13.50    1.84
  -9   7   9  280.18    6.32
  -9   7  10  100.68    7.86
  -9   7  11  117.05   16.14
  -9   7  12   18.07    5.03
  -9   7  13   20.72    5.05
  -9   7  14  169.78   16.94
  -9   7  15    7.76    4.17
  -9   7  16  187.89   17.45
  -9   7  17   17.98    6.79
  -9   7  18  136.44   15.21
  -9   7  19    1.46    5.27
  -9   7  20  163.85   17.36
  -9   7  21   13.09    5.52
  -9   7  22   78.05   12.52
  -9   8  -8  162.08   10.75
  -9   8  -7   22.63    2.85
  -9   8  -6   90.07   12.62
  -9   8  -5   86.02    6.59
  -9   8  -4   61.84    3.31
  -9   8  -3  262.21   16.89
  -9   8  -2  103.67    6.87
  -9   8  -1  414.94   18.09
  -9   8   0   29.88    3.97
  -9   8   1  521.45   14.11
  -9   8   2   11.08    3.94
  -9   8   3  332.21   11.54
  -9   8   4  231.63    9.92
  -9   8   5   14.03    4.61
  -9   8   6  231.29   14.46
  -9   8   7  114.54    4.42
  -9   8   8  187.92    5.88
  -9   8   9  138.41    4.29
  -9   8  10  494.03   55.73
  -9   8  11  181.47   10.48
  -9   8  12  429.91   24.99
  -9   8  13  359.59   21.62
  -9   8  14  144.87   13.22
  -9   8  15  185.36   17.80
  -9   8  16   87.51   12.77
  -9   8  17   35.31    8.76
  -9   8  18   21.18    5.50
  -9   8  19    9.08    6.83
  -9   8  20    5.67    4.72
  -9   8  21   18.08    6.38
  -9   8  22   42.85   10.49
  -9   9  -8    7.39    3.15
  -9   9  -7  197.53    7.97
  -9   9  -6    9.07    6.26
  -9   9  -5   99.54    8.71
  -9   9  -4    2.15    4.52
  -9   9  -3   16.22    5.68
  -9   9  -2   36.10    8.51
  -9   9  -1  267.63    8.51
  -9   9   0  198.51    7.71
  -9   9   1  365.30   12.70
  -9   9   2  368.37   12.50
  -9   9   3  671.88   16.77
  -9   9   4   66.14    6.73
  -9   9   5  581.48   16.19
  -9   9   6  100.43   10.62
  -9   9   7  853.05   28.56
  -9   9   8  240.60    7.94
  -9   9   9  506.41   19.91
  -9   9  10   33.30    4.21
  -9   9  11   14.64   10.21
  -9   9  12  100.52   12.29
  -9   9  13   61.63   11.24
  -9   9  14   24.53    6.35
  -9   9  15  278.03   21.35
  -9   9  16   52.55   11.13
  -9   9  17  408.15   25.73
  -9   9  18  196.41   16.70
  -9   9  19  275.61   22.33
  -9   9  20  117.33   14.97
  -9   9  21  138.47   17.24
  -9  10  -8   65.27    6.80
  -9  10  -7   43.58    4.97
  -9  10  -6    4.39    4.03
  -9  10  -5  272.51   18.38
  -9  10  -4   57.77    9.12
  -9  10  -3  476.93   22.20
  -9  10  -2  140.31   11.14
  -9  10  -1  371.16   21.53
  -9  10   0  126.66    8.29
  -9  10   1   55.30    4.36
  -9  10   2  164.65    8.60
  -9  10   3    6.28    3.21
  -9  10   4   40.07    7.38
  -9  10   5   20.57    4.54
  -9  10   6    4.24    1.62
  -9  10   7  229.00    8.70
  -9  10   8    2.25    2.37
  -9  10   9  986.10   70.69
  -9  10  10  107.16   11.46
  -9  10  11  856.04   35.56
  -9  10  12   80.39   11.28
  -9  10  13  571.28   27.33
  -9  10  14    6.41    5.74
  -9  10  15  408.05   25.32
  -9  10  16   15.91    6.92
  -9  10  17  136.14   15.93
  -9  10  18   16.32    8.91
  -9  10  19   17.57    8.90
  -9  10  20    0.06    4.80
  -9  10  21   56.00   11.44
  -9  11  -8  127.94    9.59
  -9  11  -7   83.63    7.45
  -9  11  -6  302.09   19.02
  -9  11  -5   28.41    6.09
  -9  11  -4  375.13   20.14
  -9  11  -3    1.89    4.37
  -9  11  -2  611.82   27.31
  -9  11  -1  228.21   16.87
  -9  11   0  732.28   30.01
  -9  11   1  276.41   11.02
  -9  11   2  123.88   10.88
  -9  11   3  494.28   16.06
  -9  11   4    3.08    6.78
  -9  11   5  622.09   24.94
  -9  11   6    1.80    4.10
  -9  11   7 1044.22   75.68
  -9  11   8   21.43    6.78
  -9  11   9  382.90   21.94
  -9  11  10   55.44    8.52
  -9  11  11   18.43    4.23
  -9  11  12   31.87    7.27
  -9  11  13   19.78    6.51
  -9  11  14   37.25    8.30
  -9  11  15  189.21   16.67
  -9  11  16   29.38    8.45
  -9  11  17  357.39   24.38
  -9  11  18    1.90    6.26
  -9  11  19  401.95   27.51
  -9  11  20    2.44    5.60
  -9  12  -8  465.24   18.33
  -9  12  -7    9.52    5.21
  -9  12  -6   86.04   11.57
  -9  12  -5   83.99   10.41
  -9  12  -4   34.80    8.03
  -9  12  -3  184.46   15.82
  -9  12  -2   20.56    5.39
  -9  12  -1  298.30   18.69
  -9  12   0  203.28   15.10
  -9  12   1  221.72   21.15
  -9  12   2  588.89   17.61
  -9  12   3  134.54    9.56
  -9  12   4  170.71    9.43
  -9  12   5    1.90    3.23
  -9  12   6  100.38   11.03
  -9  12   7  147.96   12.85
  -9  12   8  320.95   18.98
  -9  12   9  225.46   16.78
  -9  12  10  134.03   13.67
  -9  12  11  283.78   18.89
  -9  12  12   14.17    5.18
  -9  12  13  215.71   19.75
  -9  12  14    2.08    4.06
  -9  12  15   34.30    6.36
  -9  12  16    0.95    5.39
  -9  12  17   18.91    7.26
  -9  12  18    3.41    4.35
  -9  12  19    0.01    4.61
  -9  12  20    2.13    4.79
  -9  13  -8  201.84   18.03
  -9  13  -7  352.11   22.07
  -9  13  -6  589.44   29.54
  -9  13  -5  360.17   22.20
  -9  13  -4  570.27   27.35
  -9  13  -3  697.96   29.98
  -9  13  -2  543.67   25.53
  -9  13  -1  517.91   25.82
  -9  13   0  370.54   21.82
  -9  13   1   62.90    8.58
  -9  13   2  113.53    8.18
  -9  13   3  117.81    8.08
  -9  13   4   13.17    7.96
  -9  13   5  107.67   12.06
  -9  13   6   33.71    5.20
  -9  13   7  176.23   14.77
  -9  13   8   67.06    8.02
  -9  13   9  191.61   16.70
  -9  13  10   56.78   11.34
  -9  13  11   71.46    8.70
  -9  13  12   41.33    7.23
  -9  13  13    0.09    4.94
  -9  13  14   16.39    6.07
  -9  13  15    5.15    4.74
  -9  13  16    1.47    5.09
  -9  13  17    0.09    6.29
  -9  13  18    5.56    4.49
  -9  13  19    0.10    6.50
  -9  14  -8  209.06   18.10
  -9  14  -7  146.11   15.01
  -9  14  -6  104.70   12.97
  -9  14  -5   55.46    9.54
  -9  14  -4    9.70    5.32
  -9  14  -3    6.12    4.47
  -9  14  -2   80.14   10.90
  -9  14  -1  313.18   21.55
  -9  14   0  210.36   17.55
  -9  14   1  626.43   28.30
  -9  14   2  168.99   18.06
  -9  14   3  423.39   19.49
  -9  14   4  255.59   12.01
  -9  14   5  345.82   13.25
  -9  14   6   85.45   10.00
  -9  14   7  171.10   15.47
  -9  14   8    3.07    3.95
  -9  14   9   48.67    7.04
  -9  14  10    3.96    4.53
  -9  14  11    4.29    4.73
  -9  14  12    0.19    4.22
  -9  14  13    4.55    4.55
  -9  14  14    0.02    4.96
  -9  14  15    0.03    7.39
  -9  14  16    6.48    3.88
  -9  14  17    0.03    5.13
  -9  14  18   11.08    6.36
  -9  15  -8   36.17    8.62
  -9  15  -7  338.78   23.77
  -9  15  -6  104.46   12.19
  -9  15  -5  605.25   29.80
  -9  15  -4   75.69   11.14
  -9  15  -3  604.18   30.76
  -9  15  -2    8.08    6.44
  -9  15  -1  288.98   18.81
  -9  15   0    1.09    4.34
  -9  15   1  195.53   17.47
  -9  15   2    6.93    3.86
  -9  15   3  149.12   10.38
  -9  15   4   77.13    7.27
  -9  15   5   15.29    3.32
  -9  15   6   51.82    8.44
  -9  15   7   48.66    8.37
  -9  15   8  105.37   13.32
  -9  15   9   94.54   12.67
  -9  15  10   86.97    9.52
  -9  15  11   86.08   11.57
  -9  15  12   12.56    5.94
  -9  15  13   11.32    5.89
  -9  15  14   13.45    6.40
  -9  15  15    1.11    4.45
  -9  15  16    9.43    5.52
  -9  15  17    9.81    6.83
  -9  16  -8   24.23    7.12
  -9  16  -7  142.23   15.82
  -9  16  -6   79.47   12.77
  -9  16  -5    9.71    3.98
  -9  16  -4   57.45   10.30
  -9  16  -3   56.36    9.72
  -9  16  -2   54.83   10.29
  -9  16  -1   71.49    9.38
  -9  16   0  162.94   13.89
  -9  16   1  175.30   16.92
  -9  16   2   61.30   11.33
  -9  16   3  215.87   15.11
  -9  16   4    0.00    3.88
  -9  16   5  139.21    9.68
  -9  16   6   68.53    8.21
  -9  16   7   69.78   10.02
  -9  16   8  159.46   13.68
  -9  16   9   12.28    5.39
  -9  16  10  274.50   21.57
  -9  16  11    8.37    6.75
  -9  16  12  311.60   22.98
  -9  16  13    6.99    6.86
  -9  16  14  125.12   16.21
  -9  16  15    1.24    5.00
  -9  16  16   69.16   11.53
  -9  17  -8   10.05    5.27
  -9  17  -7  148.43   16.72
  -9  17  -6    3.14    4.32
  -9  17  -5  115.85   13.25
  -9  17  -4   42.63    7.92
  -9  17  -3   38.94    8.45
  -9  17  -2   26.77    6.67
  -9  17  -1   61.48    9.74
  -9  17   0   93.59   12.22
  -9  17   1   15.17    5.61
  -9  17   2  418.31   25.24
  -9  17   3   14.68    4.53
  -9  17   4  326.33   16.34
  -9  17   5   59.90    7.13
  -9  17   6  159.38   10.46
  -9  17   7   99.34   12.57
  -9  17   8   97.50   11.78
  -9  17   9   75.04   10.76
  -9  17  10   15.94    7.11
  -9  17  11   31.04    8.87
  -9  17  12    4.78    5.69
  -9  17  13    1.54    4.10
  -9  17  14  124.36   15.09
  -9  17  15    0.47    4.48
  -9  18  -8   34.49    8.60
  -9  18  -7   43.16   10.71
  -9  18  -6   51.64   10.08
  -9  18  -5   74.47   12.94
  -9  18  -4   60.60    9.78
  -9  18  -3   86.16   12.34
  -9  18  -2   73.93   11.59
  -9  18  -1   48.91    9.46
  -9  18   0  156.62   16.47
  -9  18   1  135.58   15.72
  -9  18   2  110.37   13.71
  -9  18   3   23.66    6.96
  -9  18   4    1.99    3.32
  -9  18   5   30.44    5.24
  -9  18   6  104.59    8.69
  -9  18   7   58.18    7.80
  -9  18   8  165.38   17.17
  -9  18   9  127.16   14.11
  -9  18  10  271.89   21.61
  -9  18  11  169.28   17.17
  -9  18  12  238.75   19.87
  -9  18  13  118.77   15.45
  -9  18  14  145.10   16.91
  -9  19  -7   11.41    4.07
  -9  19  -6   31.93    8.69
  -9  19  -5    2.68    3.70
  -9  19  -4   13.59    5.85
  -9  19  -3    3.79    5.93
  -9  19  -2    2.09    4.56
  -9  19  -1   65.33   11.02
  -9  19   0   56.28   10.88
  -9  19   1  113.76   13.35
  -9  19   2  145.94   15.51
  -9  19   3  200.78   19.70
  -9  19   4   67.27   10.81
  -9  19   5  289.71   17.59
  -9  19   6  117.96   10.13
  -9  19   7  193.53   16.67
  -9  19   8   79.38   12.53
  -9  19   9   61.02   11.14
  -9  19  10   15.22    6.43
  -9  19  11    4.65    6.28
  -9  19  12    2.91    4.56
  -9  20  -5   64.54   11.01
  -9  20  -4   32.29    8.53
  -9  20  -3  172.72   18.37
  -9  20  -2   57.69   10.87
  -9  20  -1   57.17   10.66
  -9  20   0   85.89   12.71
  -9  20   1   31.44    8.98
  -9  20   2  129.86   16.26
  -9  20   3    9.13    5.81
  -9  20   4   28.48    5.09
  -9  20   5   24.38    3.80
  -9  20   6   19.92    3.91
  -9  20   7   88.54   11.31
  -9  20   8    3.02    4.35
  -9  20   9  230.12   20.68
  -9  20  10   53.70    9.75
  -9  21  -2  263.65   22.53
  -9  21  -1   57.28   10.86
  -9  21   0  121.16   16.36
  -9  21   1   24.04    8.96
  -9  21   2   13.85    7.05
  -9  21   3  151.53   16.52
  -9  21   4   12.66    5.04
  -9  21   5  183.16   13.58
  -9  21   6    9.13    4.98
  -9  21   7  135.63   12.80
  -8   0  -6   40.55    6.95
  -8   0  -4   33.26    2.79
  -8   0  -2  115.25    8.97
  -8   0   0   78.45    3.25
  -8   0   2   42.65    3.30
  -8   0   4   88.44    4.40
  -8   0   6  955.61   17.76
  -8   0   8  787.62   40.65
  -8   0  10  161.69   16.26
  -8   0  12    8.83    4.24
  -8   0  14   89.52    6.50
  -8   0  16  178.04   17.08
  -8   0  18  281.63   20.87
  -8   0  20  333.22   24.78
  -8   0  22  209.83   18.79
  -8   0  24   99.24   15.05
  -8   1  -7   88.19    8.56
  -8   1  -6  116.07    4.96
  -8   1  -5   38.03    3.12
  -8   1  -4  172.09    3.96
  -8   1  -3    4.96    1.38
  -8   1  -2   17.22    1.89
  -8   1  -1   36.99    2.20
  -8   1   0    8.36    0.87
  -8   1   1  279.70    3.50
  -8   1   2    4.81    0.57
  -8   1   3   74.68    1.42
  -8   1   4  146.96    4.81
  -8   1   5  170.92    3.57
  -8   1   6   57.86    1.92
  -8   1   7  357.17    5.68
  -8   1   8  154.61    3.91
  -8   1   9  228.34    5.73
  -8   1  10  318.91   13.18
  -8   1  11   92.92    6.31
  -8   1  12  414.79   15.26
  -8   1  13   55.07    8.83
  -8   1  14  345.00   14.59
  -8   1  15    6.35    2.51
  -8   1  16  345.22   15.53
  -8   1  17    3.89    3.00
  -8   1  18  160.35   11.20
  -8   1  19    2.67    5.46
  -8   1  20   14.39    4.16
  -8   1  21    2.52    3.23
  -8   1  22   12.61    3.73
  -8   1  23   13.38    5.72
  -8   1  24   70.54    9.87
  -8   2  -7  260.03   11.32
  -8   2  -6  165.16    8.31
  -8   2  -5  812.81   13.74
  -8   2  -4  585.66   10.55
  -8   2  -3 1407.03   18.44
  -8   2  -2  339.13   11.94
  -8   2  -1  975.56   24.39
  -8   2   0  244.76    3.71
  -8   2   1  427.87    6.24
  -8   2   2  157.43    3.52
  -8   2   3  177.71    4.79
  -8   2   4   14.47    1.08
  -8   2   5   75.94    1.55
  -8   2   6  429.56    5.71
  -8   2   7    6.28    2.10
  -8   2   8  991.07   22.45
  -8   2   9  193.88   10.25
  -8   2  10  438.35   14.71
  -8   2  11  278.32   11.75
  -8   2  12  146.16   10.15
  -8   2  13  274.21   21.21
  -8   2  14   29.90    3.80
  -8   2  15  160.09    9.86
  -8   2  16    0.77    3.42
  -8   2  17  123.51    9.55
  -8   2  18   79.38    7.37
  -8   2  19  100.85    9.54
  -8   2  20   52.15    7.28
  -8   2  21   36.71    7.31
  -8   2  22   44.25    8.19
  -8   2  23    6.10    4.05
  -8   2  24   62.13    8.43
  -8   3  -7  199.75    6.91
  -8   3  -6  707.42   12.29
  -8   3  -5  152.48    5.27
  -8   3  -4  347.89    7.92
  -8   3  -3  151.61    8.07
  -8   3  -2  117.45    6.24
  -8   3  -1    9.56    1.03
  -8   3   0  669.06    6.95
  -8   3   1  674.86    6.63
  -8   3   2  510.52    5.29
  -8   3   3  447.68   12.08
  -8   3   4 1462.87   22.38
  -8   3   5  984.83   14.04
  -8   3   6 1351.77   24.69
  -8   3   7  702.74   17.87
  -8   3   8  293.23   12.01
  -8   3   9  634.78   18.57
  -8   3  10   20.10    2.55
  -8   3  11  174.23   10.05
  -8   3  12   19.69    3.74
  -8   3  13   38.59    2.87
  -8   3  14  181.99    8.89
  -8   3  15   45.73    5.50
  -8   3  16  246.06   14.05
  -8   3  17    0.15    3.42
  -8   3  18   96.28   11.52
  -8   3  19   15.81    5.20
  -8   3  20   22.67    5.50
  -8   3  21   51.60    6.48
  -8   3  22    0.20    4.10
  -8   3  23   35.61   10.16
  -8   3  24    0.48    5.16
  -8   4  -7  115.52    2.95
  -8   4  -6  741.97   16.27
  -8   4  -5  147.48    2.71
  -8   4  -4 1693.18   19.70
  -8   4  -3  158.45    4.19
  -8   4  -2 2490.06   21.36
  -8   4  -1  537.93    7.92
  -8   4   0 2149.48   17.91
  -8   4   1  671.73    8.63
  -8   4   2  791.66    9.58
  -8   4   3   82.25    6.93
  -8   4   4  131.32    6.06
  -8   4   5   15.90    1.88
  -8   4   6   47.22    4.07
  -8   4   7   21.38    1.37
  -8   4   8  226.74   11.12
  -8   4   9   49.21   11.97
  -8   4  10  695.94   19.95
  -8   4  11   37.42    5.06
  -8   4  12  717.18   27.63
  -8   4  13   32.10    2.14
  -8   4  14  297.66    8.99
  -8   4  15    7.44    4.10
  -8   4  16  209.25   39.53
  -8   4  17   13.38    3.73
  -8   4  18   42.21   11.43
  -8   4  19    0.17    3.53
  -8   4  20    0.00    3.92
  -8   4  21    0.03    3.30
  -8   4  22    1.29    3.11
  -8   4  23    0.06    7.23
  -8   5  -7    6.65    1.26
  -8   5  -6 1029.69   11.52
  -8   5  -5    1.70    0.98
  -8   5  -4  388.05    6.29
  -8   5  -3   12.32    1.22
  -8   5  -2   38.57    2.33
  -8   5  -1   21.63    1.13
  -8   5   0  885.80   11.02
  -8   5   1   43.98    2.44
  -8   5   2 1246.09   16.81
  -8   5   3   13.38    2.52
  -8   5   4 1649.23   20.23
  -8   5   5    7.87    1.89
  -8   5   6 1922.19   68.27
  -8   5   7   12.89    2.38
  -8   5   8 1420.33   79.35
  -8   5   9    1.94    4.40
  -8   5  10  354.29   19.23
  -8   5  11    6.53    4.28
  -8   5  12   10.74    4.73
  -8   5  13    4.58    5.78
  -8   5  14   58.35   14.14
  -8   5  15    0.87    3.93
  -8   5  16  147.28   14.62
  -8   5  17   11.07    6.85
  -8   5  18  162.28   16.74
  -8   5  19    0.10    5.86
  -8   5  20  166.02   16.43
  -8   5  21    0.09    6.02
  -8   5  22   82.12   13.65
  -8   5  23    0.31    5.75
  -8   6  -7   96.84    3.40
  -8   6  -6  647.11    9.34
  -8   6  -5   50.11    2.63
  -8   6  -4  954.64   14.29
  -8   6  -3   71.50    4.59
  -8   6  -2 1788.94   26.70
  -8   6  -1  130.41    7.02
  -8   6   0 2660.91   29.11
  -8   6   1  135.45    3.92
  -8   6   2  831.58   13.33
  -8   6   3    1.65    1.57
  -8   6   4   35.48    2.97
  -8   6   5    0.77    0.76
  -8   6   6  182.14    4.22
  -8   6   7    1.25    1.38
  -8   6   8  516.43   18.63
  -8   6   9    2.14    1.45
  -8   6  10  679.04   24.63
  -8   6  11    5.00    4.98
  -8   6  12  482.23   24.22
  -8   6  13    4.56    3.97
  -8   6  14  226.10   15.49
  -8   6  15   68.35   10.08
  -8   6  16  185.73   17.46
  -8   6  17   57.07    9.07
  -8   6  18   33.31    6.79
  -8   6  19   63.07   10.81
  -8   6  20    1.47    4.39
  -8   6  21   32.19    8.63
  -8   6  22    9.73    5.51
  -8   6  23   34.80    9.92
  -8   7  -7  259.10    5.87
  -8   7  -6  418.03    9.69
  -8   7  -5   75.77    3.60
  -8   7  -4  228.98    7.22
  -8   7  -3   26.29    2.85
  -8   7  -2    2.00    3.14
  -8   7  -1    5.77    1.90
  -8   7   0  278.49   10.48
  -8   7   1   10.19    1.79
  -8   7   2  629.67   10.96
  -8   7   3  117.23    5.63
  -8   7   4  632.35   12.66
  -8   7   5  331.48   12.18
  -8   7   6  559.21   10.67
  -8   7   7  363.39   12.59
  -8   7   8  118.00    3.94
  -8   7   9  106.96    4.16
  -8   7  10    4.90    1.20
  -8   7  11  174.14   13.13
  -8   7  12   47.05    8.73
  -8   7  13  132.29   13.25
  -8   7  14  112.52   10.27
  -8   7  15   60.24    9.41
  -8   7  16  150.84   15.03
  -8   7  17    3.02    4.46
  -8   7  18   62.71   10.69
  -8   7  19    0.07    5.56
  -8   7  20   23.69    6.63
  -8   7  21   25.12    8.52
  -8   7  22    0.33    5.39
  -8   7  23   53.41   10.28
  -8   8  -7  223.87    6.18
  -8   8  -6    7.71    2.05
  -8   8  -5  188.39   12.51
  -8   8  -4  104.29    4.32
  -8   8  -3  160.08   21.06
  -8   8  -2   88.05    7.21
  -8   8  -1   77.67    9.98
  -8   8   0   97.28    6.75
  -8   8   1  247.21   10.05
  -8   8   2   18.05    3.15
  -8   8   3  201.65   13.49
  -8   8   4    0.25    1.42
  -8   8   5   40.07    2.62
  -8   8   6  195.80    6.51
  -8   8   7   17.21    2.38
  -8   8   8  254.54    7.19
  -8   8   9   16.29    2.50
  -8   8  10  169.94    4.70
  -8   8  11    3.71    5.14
  -8   8  12   57.05    9.87
  -8   8  13   42.04    7.21
  -8   8  14    8.61    4.12
  -8   8  15  145.27   13.10
  -8   8  16    6.90    5.05
  -8   8  17  199.12   17.46
  -8   8  18   43.69    9.27
  -8   8  19  165.53   17.36
  -8   8  20   63.49   10.24
  -8   8  21   50.88    9.32
  -8   8  22   90.67   13.24
  -8   9  -7    2.98    6.24
  -8   9  -6    7.22    3.54
  -8   9  -5    4.02    2.12
  -8   9  -4    5.56    1.58
  -8   9  -3    0.08    2.82
  -8   9  -2   32.78    5.01
  -8   9  -1    5.09    3.63
  -8   9   0    7.01    3.14
  -8   9   1    0.05    2.41
  -8   9   2   74.26    6.70
  -8   9   3   35.68    4.21
  -8   9   4    0.67    1.40
  -8   9   5  177.19    8.17
  -8   9   6    4.22    1.09
  -8   9   7    2.69    1.16
  -8   9   8   20.24    2.48
  -8   9   9    2.61    1.00
  -8   9  10  121.91    7.94
  -8   9  11   94.86    9.54
  -8   9  12  225.86   17.04
  -8   9  13   48.92    8.45
  -8   9  14  169.88   14.46
  -8   9  15   45.53    8.88
  -8   9  16  237.44   19.10
  -8   9  17   20.23    7.97
  -8   9  18   55.99   11.72
  -8   9  19    5.73    6.01
  -8   9  20    0.12    4.81
  -8   9  21    0.22    6.44
  -8   9  22    9.77    6.03
  -8  10  -7    9.62    2.60
  -8  10  -6    9.53    5.28
  -8  10  -5    5.85    3.51
  -8  10  -4   15.81    2.10
  -8  10  -3   63.09    8.82
  -8  10  -2   86.87   10.00
  -8  10  -1  163.14   12.85
  -8  10   0   35.40    6.50
  -8  10   1  216.38   15.24
  -8  10   2   42.51    6.83
  -8  10   3  123.62    6.63
  -8  10   4   62.76    7.78
  -8  10   5    5.92    2.19
  -8  10   6  280.95    8.37
  -8  10   7  196.01    6.97
  -8  10   8  244.44    8.71
  -8  10   9   36.70    2.20
  -8  10  10   36.23    3.89
  -8  10  11    0.30    4.29
  -8  10  12    1.53    5.41
  -8  10  13   38.78    6.19
  -8  10  14   24.81    7.79
  -8  10  15   33.05    7.04
  -8  10  16  240.40   18.25
  -8  10  17    6.04    6.91
  -8  10  18  321.21   23.81
  -8  10  19   18.36    7.53
  -8  10  20  225.07   20.77
  -8  10  21    1.69    6.40
  -8  11  -7  251.25   15.80
  -8  11  -6   74.41    8.93
  -8  11  -5    3.22    4.76
  -8  11  -4    1.40    3.42
  -8  11  -3   21.76    5.90
  -8  11  -2   35.29    6.13
  -8  11  -1   98.51    9.25
  -8  11   0    0.67    3.24
  -8  11   1  315.81   19.76
  -8  11   2   19.63    3.41
  -8  11   3  505.19   14.29
  -8  11   4   28.96    5.29
  -8  11   5  480.31   22.36
  -8  11   6   45.75    7.83
  -8  11   7  618.33   14.65
  -8  11   8   67.95    8.41
  -8  11   9  177.82    8.22
  -8  11  10   64.07    4.77
  -8  11  11   12.62    5.06
  -8  11  12  254.71   17.38
  -8  11  13   27.68    5.91
  -8  11  14  272.34   19.53
  -8  11  15    7.06    6.54
  -8  11  16  237.15   19.90
  -8  11  17   33.41   10.09
  -8  11  18   56.87   10.97
  -8  11  19   36.61    8.85
  -8  11  20    0.04    4.53
  -8  11  21    7.43    4.40
  -8  12  -7  453.21   26.31
  -8  12  -6   58.74   11.35
  -8  12  -5 1160.73   39.13
  -8  12  -4  342.51   20.47
  -8  12  -3 1444.76   44.99
  -8  12  -2  344.53   19.78
  -8  12  -1 1197.41   38.69
  -8  12   0  166.71   13.98
  -8  12   1  705.32   29.04
  -8  12   2   80.23   10.26
  -8  12   3  132.95   10.22
  -8  12   4    7.08    4.26
  -8  12   5   27.17    5.40
  -8  12   6  259.61   18.42
  -8  12   7  174.41   12.17
  -8  12   8  341.38   36.52
  -8  12   9  291.13   17.51
  -8  12  10  255.26   21.25
  -8  12  11  280.54   18.93
  -8  12  12  106.24   11.30
  -8  12  13  320.40   20.43
  -8  12  14   32.35    7.63
  -8  12  15  285.70   21.71
  -8  12  16    0.64    5.04
  -8  12  17   87.84   11.38
  -8  12  18   45.48    8.79
  -8  12  19   33.30    7.97
  -8  12  20   96.98   15.22
  -8  13  -7  479.32   26.95
  -8  13  -6  192.67   17.32
  -8  13  -5  140.11   12.15
  -8  13  -4  140.46   12.87
  -8  13  -3   35.18    7.85
  -8  13  -2    2.47    4.53
  -8  13  -1  102.12   10.72
  -8  13   0  179.97   15.76
  -8  13   1  681.86   28.32
  -8  13   2  527.79   25.58
  -8  13   3  684.28   24.88
  -8  13   4  833.29   22.56
  -8  13   5  457.04   22.08
  -8  13   6  762.23   29.33
  -8  13   7  800.85   31.35
  -8  13   8  216.42   17.00
  -8  13   9  528.08   25.74
  -8  13  10   58.78    8.51
  -8  13  11  130.63   14.63
  -8  13  12   11.82    5.52
  -8  13  13   23.10    5.50
  -8  13  14   12.27    6.69
  -8  13  15    0.07    6.23
  -8  13  16   33.95    8.45
  -8  13  17   40.57    7.21
  -8  13  18   37.31    8.02
  -8  13  19   26.66    6.82
  -8  13  20   20.54    7.68
  -8  14  -7   71.69   10.12
  -8  14  -6  473.72   25.79
  -8  14  -5  220.39   18.83
  -8  14  -4 1024.26   37.12
  -8  14  -3  500.97   24.41
  -8  14  -2 1343.49   45.38
  -8  14  -1  446.27   25.55
  -8  14   0  988.25   35.85
  -8  14   1  306.10   18.28
  -8  14   2  307.64   19.31
  -8  14   3   39.68    6.70
  -8  14   4   77.89    7.66
  -8  14   5    1.86    3.58
  -8  14   6   29.80    5.27
  -8  14   7  104.59   11.69
  -8  14   8  294.74   18.68
  -8  14   9  166.36   14.54
  -8  14  10  526.71   27.24
  -8  14  11  253.09   19.34
  -8  14  12  242.11   18.66
  -8  14  13  130.49   13.84
  -8  14  14  164.62   17.53
  -8  14  15   13.15    6.40
  -8  14  16  103.90   13.65
  -8  14  17    0.93    4.77
  -8  14  18   48.46    9.31
  -8  14  19    0.08    5.65
  -8  15  -7   57.90    9.49
  -8  15  -6  302.51   21.36
  -8  15  -5   69.12   10.75
  -8  15  -4   76.98   10.40
  -8  15  -3   61.11   10.06
  -8  15  -2   37.29    7.34
  -8  15  -1    9.86    4.82
  -8  15   0  682.11   30.00
  -8  15   1   42.31    8.25
  -8  15   2  979.28   36.75
  -8  15   3   42.39    7.45
  -8  15   4 1175.49   30.01
  -8  15   5   17.58    7.57
  -8  15   6  940.86   34.11
  -8  15   7    0.39    6.13
  -8  15   8  521.96   27.68
  -8  15   9   11.38    6.67
  -8  15  10  227.73   18.17
  -8  15  11    0.24    3.80
  -8  15  12   51.61    8.35
  -8  15  13   36.83    7.05
  -8  15  14    0.07    4.02
  -8  15  15   22.22    6.71
  -8  15  16   24.38    7.14
  -8  15  17   39.52    9.85
  -8  15  18   83.16   12.56
  -8  16  -7   35.47    7.68
  -8  16  -6  477.79   27.06
  -8  16  -5   32.08    8.22
  -8  16  -4  756.78   33.49
  -8  16  -3   20.57    7.78
  -8  16  -2  613.67   30.10
  -8  16  -1    3.85    4.68
  -8  16   0  514.20   27.13
  -8  16   1    3.69    4.55
  -8  16   2  285.82   20.74
  -8  16   3   12.72    5.63
  -8  16   4   70.39    7.07
  -8  16   5   14.16    4.32
  -8  16   6   21.50    5.55
  -8  16   7   30.97    7.31
  -8  16   8  129.00   12.48
  -8  16   9   56.78    9.80
  -8  16  10  313.48   21.17
  -8  16  11   48.52    9.56
  -8  16  12  200.17   19.56
  -8  16  13    0.25    5.00
  -8  16  14  127.31   15.21
  -8  16  15   12.48    7.01
  -8  16  16   72.03   11.07
  -8  16  17   51.22   10.57
  -8  17  -7    4.32    4.54
  -8  17  -6   43.46   10.43
  -8  17  -5   10.92    6.29
  -8  17  -4    0.37    4.18
  -8  17  -3   22.31    6.94
  -8  17  -2   13.06    5.82
  -8  17  -1    1.26    4.61
  -8  17   0   62.13   10.38
  -8  17   1    1.35    3.87
  -8  17   2  146.72   13.99
  -8  17   3    7.70    5.52
  -8  17   4  125.33   13.57
  -8  17   5   41.66    9.63
  -8  17   6   81.99   12.18
  -8  17   7   74.70   10.39
  -8  17   8   54.56    9.98
  -8  17   9   87.48   11.36
  -8  17  10   13.69    5.88
  -8  17  11  149.83   16.57
  -8  17  12   14.45    6.66
  -8  17  13  147.32   16.86
  -8  17  14   23.58    6.93
  -8  17  15   99.74   13.96
  -8  17  16   38.65    9.02
  -8  18  -7   71.58   11.22
  -8  18  -6   25.54    6.72
  -8  18  -5   40.16    9.42
  -8  18  -4    6.67    5.09
  -8  18  -3   26.53    6.53
  -8  18  -2    0.02    4.40
  -8  18  -1    1.96    4.37
  -8  18   0   15.16    6.20
  -8  18   1   15.03    7.23
  -8  18   2    0.07    4.62
  -8  18   3   17.81    4.64
  -8  18   4    5.43    4.26
  -8  18   5   16.90    5.03
  -8  18   6   39.69    5.71
  -8  18   7   40.31    8.41
  -8  18   8   69.70   11.62
  -8  18   9   23.73    7.02
  -8  18  10   48.68    8.38
  -8  18  11    1.37    3.83
  -8  18  12    9.55    5.74
  -8  18  13   12.01    6.25
  -8  18  14    3.07    4.40
  -8  18  15   42.14    9.55
  -8  19  -7    9.70    5.33
  -8  19  -6    0.43    6.40
  -8  19  -5    2.27    3.98
  -8  19  -4    4.76    5.58
  -8  19  -3   11.39    6.10
  -8  19  -2   25.22    5.98
  -8  19  -1   16.13    6.36
  -8  19   0    1.53    4.17
  -8  19   1   31.32    8.60
  -8  19   2    1.55    4.32
  -8  19   3   16.14    6.10
  -8  19   4    2.56    4.03
  -8  19   5    1.09    3.07
  -8  19   6   18.20    4.88
  -8  19   7    0.32    3.61
  -8  19   8   17.63    6.03
  -8  19   9    2.88    5.71
  -8  19  10   74.60   11.12
  -8  19  11   19.72    7.11
  -8  19  12   73.59   12.60
  -8  19  13   32.13    9.87
  -8  20  -7    1.78    5.20
  -8  20  -6   34.29    8.59
  -8  20  -5   79.95   12.84
  -8  20  -4   24.48    6.56
  -8  20  -3  143.26   16.21
  -8  20  -2   36.71    8.51
  -8  20  -1  176.02   16.39
  -8  20   0   35.42    8.12
  -8  20   1   70.94   12.54
  -8  20   2   35.33    9.99
  -8  20   3   12.57    6.60
  -8  20   4   59.13   10.73
  -8  20   5    2.84    3.58
  -8  20   6   75.70   12.60
  -8  20   7   38.14    6.21
  -8  20   8   49.10    9.66
  -8  20   9   95.95   13.75
  -8  20  10    8.00    5.00
  -8  20  11   53.72    9.23
  -8  20  12    9.90    7.07
  -8  21  -5   66.24   11.48
  -8  21  -4    0.28    5.50
  -8  21  -3    2.40    5.98
  -8  21  -2    0.26    4.26
  -8  21  -1   76.65   13.66
  -8  21   0    4.44    4.45
  -8  21   1  242.23   21.52
  -8  21   2    0.81    4.69
  -8  21   3  223.72   21.16
  -8  21   4    6.30    6.12
  -8  21   5  248.08   16.62
  -8  21   6    8.82    4.10
  -8  21   7  267.24   24.35
  -8  21   8   23.41    5.78
  -8  21   9   85.80   12.68
  -8  22  -1  393.79   28.03
  -8  22   0   65.82   13.10
  -8  22   1  240.13   21.64
  -8  22   2   12.60    5.70
  -8  22   3  117.00   15.50
  -8  22   4    4.22    6.02
  -8  22   5    6.62    3.82
  -8  22   6   22.46    5.28
  -7   0  -5 1169.12   31.97
  -7   0  -3 2820.86   31.58
  -7   0  -1 2141.86   29.35
  -7   0   1 2205.74   19.49
  -7   0   3  272.04   14.08
  -7   0   5  134.35    4.89
  -7   0   7   33.35    2.14
  -7   0   9   20.30    4.84
  -7   0  11    5.35    2.83
  -7   0  13   75.34    8.73
  -7   0  15    1.57    4.65
  -7   0  17  156.26   15.77
  -7   0  19   13.71    4.46
  -7   0  21    1.16    7.19
  -7   0  23    1.67    6.53
  -7   1  -6   77.18    4.36
  -7   1  -5  389.05    9.36
  -7   1  -4  257.28    6.27
  -7   1  -3  449.18    6.23
  -7   1  -2  305.40    4.85
  -7   1  -1    0.52    0.67
  -7   1   0  534.00    5.56
  -7   1   1  212.17    3.36
  -7   1   2   83.22    1.77
  -7   1   3  832.30    9.86
  -7   1   4  101.76    1.84
  -7   1   5  994.04   13.27
  -7   1   6   11.31    0.79
  -7   1   7   42.33    3.09
  -7   1   8   23.82    5.05
  -7   1   9    1.00    6.20
  -7   1  10  265.03   11.02
  -7   1  11   26.60    3.58
  -7   1  12  373.52   15.27
  -7   1  13    6.10    3.00
  -7   1  14  183.76   10.17
  -7   1  15    0.41    2.93
  -7   1  16   81.46    8.58
  -7   1  17    0.18   10.01
  -7   1  18   91.78    7.13
  -7   1  19   39.54    6.98
  -7   1  20   36.43    6.31
  -7   1  21   28.89    9.21
  -7   1  22    0.33    5.04
  -7   1  23   31.85    4.96
  -7   1  24    0.19    4.07
  -7   2  -6    8.98    1.89
  -7   2  -5  784.96   13.42
  -7   2  -4   45.21    1.92
  -7   2  -3 1343.72   12.19
  -7   2  -2    8.78    3.22
  -7   2  -1  539.42    7.79
  -7   2   0  594.02    6.90
  -7   2   1  243.66    3.45
  -7   2   2  494.76    7.25
  -7   2   3  238.51    2.21
  -7   2   4  587.76    9.45
  -7   2   5  174.08    5.02
  -7   2   6  584.75   11.24
  -7   2   7  286.92    8.23
  -7   2   8  778.75   16.84
  -7   2   9  496.16   16.55
  -7   2  10  419.10   16.72
  -7   2  11   37.83    2.31
  -7   2  12   62.82    3.14
  -7   2  13    0.93    1.21
  -7   2  14   28.29    2.55
  -7   2  15   38.88    5.49
  -7   2  16    4.77    2.90
  -7   2  17  142.46    9.76
  -7   2  18   15.50    3.73
  -7   2  19   48.16    6.32
  -7   2  20   50.63    7.36
  -7   2  21   40.56    6.14
  -7   2  22   80.20    8.81
  -7   2  23    4.02    7.68
  -7   2  24   82.19    9.90
  -7   3  -6  391.63   10.04
  -7   3  -5   77.29    2.79
  -7   3  -4 1039.46   15.95
  -7   3  -3  439.08    5.40
  -7   3  -2  637.12   11.05
  -7   3  -1 1806.85   14.91
  -7   3   0  304.97    3.51
  -7   3   1  855.45    9.08
  -7   3   2  192.37    3.37
  -7   3   3  505.53    7.74
  -7   3   4  253.49    6.80
  -7   3   5  335.60    7.07
  -7   3   6   31.85    3.54
  -7   3   7   46.08    3.81
  -7   3   8  248.94    8.68
  -7   3   9  192.31    8.47
  -7   3  10  154.84   10.08
  -7   3  11  599.87   17.57
  -7   3  12  306.16    8.84
  -7   3  13  534.14   10.49
  -7   3  14  278.44    8.30
  -7   3  15  368.36   14.41
  -7   3  16  178.78   10.90
  -7   3  17  255.63   12.98
  -7   3  18  136.66   10.76
  -7   3  19   36.54    5.67
  -7   3  20   39.89    6.60
  -7   3  21    0.75    4.47
  -7   3  22    3.33    3.54
  -7   3  23   25.91    5.60
  -7   3  24    1.15    4.59
  -7   4  -6   52.07    1.54
  -7   4  -5 1159.09   14.29
  -7   4  -4    0.49    1.74
  -7   4  -3  360.19    9.63
  -7   4  -2  118.58    2.68
  -7   4  -1  363.73    7.34
  -7   4   0   93.38    4.05
  -7   4   1  409.31    6.11
  -7   4   2   13.38    1.53
  -7   4   3 2064.67   23.77
  -7   4   4  375.32    8.13
  -7   4   5 3282.50   27.32
  -7   4   6  598.88   13.84
  -7   4   7 2128.08  113.88
  -7   4   8  297.41   13.17
  -7   4   9  891.44   23.08
  -7   4  10   81.86    7.19
  -7   4  11  347.06   13.18
  -7   4  12   52.82    4.93
  -7   4  13   54.82    3.75
  -7   4  14   40.65    4.37
  -7   4  15   89.03    7.58
  -7   4  16   50.53    6.86
  -7   4  17  319.06   40.06
  -7   4  18   85.53    8.06
  -7   4  19  306.26   25.94
  -7   4  20   45.99    8.81
  -7   4  21  266.30   15.16
  -7   4  22   40.12    6.24
  -7   4  23  136.16   12.70
  -7   4  24   31.24    9.82
  -7   5  -6    3.07    1.70
  -7   5  -5  941.56   16.60
  -7   5  -4   25.47    5.37
  -7   5  -3 1545.60   14.90
  -7   5  -2   16.81    2.01
  -7   5  -1 3258.55   31.52
  -7   5   0   66.58    3.83
  -7   5   1 2592.99   27.90
  -7   5   2   69.03    1.74
  -7   5   3 1681.85   20.28
  -7   5   4   21.52    3.35
  -7   5   5  120.81    4.84
  -7   5   6    8.51    1.94
  -7   5   7  224.88   10.90
  -7   5   8   75.37    7.29
  -7   5   9  829.35   27.93
  -7   5  10   30.31    8.14
  -7   5  11  679.36   28.01
  -7   5  12   28.49    7.18
  -7   5  13  688.48   29.92
  -7   5  14    0.77    2.45
  -7   5  15  900.48   23.33
  -7   5  16   12.86    4.10
  -7   5  17  613.70   46.99
  -7   5  18   13.82    5.89
  -7   5  19  111.09   14.90
  -7   5  20    0.43    4.64
  -7   5  21    8.27    5.56
  -7   5  22   13.55    7.18
  -7   5  23    6.55    6.44
  -7   5  24    8.73    5.87
  -7   6  -6   30.66    1.61
  -7   6  -5  861.48   14.32
  -7   6  -4  140.35    5.51
  -7   6  -3  290.51   11.30
  -7   6  -2  186.81   13.06
  -7   6  -1    3.34    4.05
  -7   6   0  137.37    6.22
  -7   6   1  157.09    5.25
  -7   6   2   60.36    3.91
  -7   6   3  746.30   14.15
  -7   6   4   35.13    1.60
  -7   6   5 1462.10   16.91
  -7   6   6  294.81    8.55
  -7   6   7 2080.19   24.24
  -7   6   8   96.20    5.13
  -7   6   9  801.01   87.72
  -7   6  10    9.75    4.61
  -7   6  11  141.88   12.49
  -7   6  12   25.81    8.19
  -7   6  13   32.27    6.11
  -7   6  14   19.63    5.56
  -7   6  15   45.75   12.05
  -7   6  16    2.96    5.37
  -7   6  17  190.46   16.87
  -7   6  18   12.12    7.32
  -7   6  19  208.59   18.95
  -7   6  20    1.38    4.42
  -7   6  21  195.19   18.37
  -7   6  22   10.21    7.55
  -7   6  23  135.37   16.72
  -7   7  -6  613.70   11.42
  -7   7  -5   27.93    2.27
  -7   7  -4  681.17   21.92
  -7   7  -3  239.30   19.06
  -7   7  -2   47.78    3.45
  -7   7  -1 1418.36   35.43
  -7   7   0   89.58   10.13
  -7   7   1 1092.94   15.25
  -7   7   2  184.83    6.19
  -7   7   3  507.96   10.26
  -7   7   4    6.34    1.01
  -7   7   5  315.81    6.85
  -7   7   6   90.02    4.48
  -7   7   7   33.42    3.02
  -7   7   8  163.60    5.53
  -7   7   9  287.69   10.95
  -7   7  10   76.44    2.63
  -7   7  11  551.00   14.73
  -7   7  12    0.37    2.70
  -7   7  13  346.51   22.81
  -7   7  14   78.05   10.50
  -7   7  15  216.65   16.72
  -7   7  16  156.70   15.87
  -7   7  17  144.65   15.05
  -7   7  18   48.48    9.81
  -7   7  19   30.35    7.30
  -7   7  20    9.89    4.68
  -7   7  21    7.07    5.33
  -7   7  22   13.19    6.36
  -7   7  23   38.98   10.62
  -7   8  -6   12.69    4.93
  -7   8  -5  355.48   18.86
  -7   8  -4   37.05    4.03
  -7   8  -3 1064.07   57.32
  -7   8  -2  188.02   13.18
  -7   8  -1  393.04   18.92
  -7   8   0  821.39   26.46
  -7   8   1    0.67    2.52
  -7   8   2  588.44   12.68
  -7   8   3    1.62    2.83
  -7   8   4  477.23   13.28
  -7   8   5   93.72    4.12
  -7   8   6  430.77    8.70
  -7   8   7  224.59    5.98
  -7   8   8  139.27   16.76
  -7   8   9   83.85    5.37
  -7   8  10   11.95    4.43
  -7   8  11    0.91    5.06
  -7   8  12    0.15    4.58
  -7   8  13    0.43    1.77
  -7   8  14   13.54    5.95
  -7   8  15   65.50   10.22
  -7   8  16    0.76    5.82
  -7   8  17   70.01    9.85
  -7   8  18    4.62    4.96
  -7   8  19   57.56   10.93
  -7   8  20   34.45    9.01
  -7   8  21   27.22    8.73
  -7   8  22   26.22    8.23
  -7   8  23    1.57    4.63
  -7   9  -6   52.84    7.56
  -7   9  -5  352.66   16.39
  -7   9  -4   30.59    4.77
  -7   9  -3  108.15   10.53
  -7   9  -2    0.39    2.44
  -7   9  -1    1.54    3.57
  -7   9   0   13.42    3.76
  -7   9   1   79.72    9.63
  -7   9   2   64.98    6.06
  -7   9   3  113.46    6.39
  -7   9   4   72.49    4.46
  -7   9   5  266.44    8.03
  -7   9   6    0.09    1.37
  -7   9   7   32.60    4.75
  -7   9   8    0.69    1.67
  -7   9   9    1.01    1.83
  -7   9  10   47.95    5.01
  -7   9  11    7.53    3.65
  -7   9  12    1.76    5.00
  -7   9  13    4.64    4.45
  -7   9  14    0.45    5.93
  -7   9  15    1.68    4.85
  -7   9  16    9.49    5.41
  -7   9  17    1.75    4.07
  -7   9  18   34.07    6.76
  -7   9  19   34.01    7.86
  -7   9  20   18.50    7.27
  -7   9  21   37.45   10.50
  -7   9  22    0.73    5.03
  -7  10  -6   89.94   10.66
  -7  10  -5  336.40   19.13
  -7  10  -4    6.47    3.70
  -7  10  -3  554.97   24.82
  -7  10  -2    5.64    1.50
  -7  10  -1  875.49   29.61
  -7  10   0   19.34    5.25
  -7  10   1  665.26   23.86
  -7  10   2    6.23    3.24
  -7  10   3  405.55   18.36
  -7  10   4   29.77    6.29
  -7  10   5    6.44    4.37
  -7  10   6  256.50    7.74
  -7  10   7    4.19    1.47
  -7  10   8  200.28    9.74
  -7  10   9    0.03    5.52
  -7  10  10   71.26    5.83
  -7  10  11    2.84    4.01
  -7  10  12   47.06    7.54
  -7  10  13   48.82    8.31
  -7  10  14    4.89    3.78
  -7  10  15    3.53    4.59
  -7  10  16   12.63    4.44
  -7  10  17   39.01    8.69
  -7  10  18    5.67    4.36
  -7  10  19    8.35    5.15
  -7  10  20    4.76    6.08
  -7  10  21    0.16    5.44
  -7  10  22    0.77    6.46
  -7  11  -6  112.30   11.81
  -7  11  -5  256.15   18.30
  -7  11  -4  443.71   18.60
  -7  11  -3   73.46    8.49
  -7  11  -2  524.19   11.37
  -7  11  -1    3.34    3.75
  -7  11   0  496.41   20.81
  -7  11   1  255.20   15.87
  -7  11   2  255.60   15.48
  -7  11   4   80.89    7.39
  -7  11   5  284.59   16.83
  -7  11   6   17.26    1.83
  -7  11   7    4.69    2.25
  -7  11   8   55.78    6.35
  -7  11   9   28.75    4.08
  -7  11  10   62.66    8.63
  -7  11  11   49.01    8.33
  -7  11  12  199.76   16.30
  -7  11  13    5.87    4.87
  -7  11  14  296.60   20.78
  -7  11  15    0.00    4.69
  -7  11  16  155.78   16.18
  -7  11  17    0.98    4.71
  -7  11  18  110.37   14.40
  -7  11  19   30.13    8.07
  -7  11  20   34.99    8.53
  -7  11  21   62.67   11.69
  -7  12  -6  152.55   13.15
  -7  12  -5  306.00   19.01
  -7  12  -4   77.08    8.97
  -7  12  -3  445.31    9.56
  -7  12  -2   11.59    1.48
  -7  12  -1  264.20    9.35
  -7  12   0  115.19    7.50
  -7  12   1   96.05   10.69
  -7  12   2  571.22   24.23
  -7  12   3    9.32    5.57
  -7  12   4  986.43   31.24
  -7  12   5  211.77   14.25
  -7  12   6 1236.46   36.66
  -7  12   7   62.11    4.81
  -7  12   8  628.71   26.90
  -7  12   9  264.32   16.26
  -7  12  10  363.59   20.11
  -7  12  11   58.47    9.47
  -7  12  12  240.16   19.80
  -7  12  13    8.88    4.62
  -7  12  14   45.54    6.59
  -7  12  15    6.68    4.52
  -7  12  16   14.09    5.79
  -7  12  17    4.88    5.16
  -7  12  18   53.40   10.96
  -7  12  19   37.70    9.13
  -7  12  20   96.55   13.36
  -7  12  21   24.07    8.23
  -7  13  -6  162.79   13.16
  -7  13  -5   83.62   10.69
  -7  13  -4  758.99   33.61
  -7  13  -3  340.08    9.40
  -7  13  -2  590.43   11.52
  -7  13  -1  688.14   14.06
  -7  13   0  586.19   13.08
  -7  13   1  706.88   41.42
  -7  13   2  298.20   18.58
  -7  13   3  446.56   20.96
  -7  13   5  102.60   11.31
  -7  13   6   13.18    5.23
  -7  13   7   12.81    5.93
  -7  13   8  130.98    7.55
  -7  13   9  246.42   15.83
  -7  13  10  224.72   18.20
  -7  13  11  629.97   30.52
  -7  13  12  371.57   24.58
  -7  13  13  473.38   24.48
  -7  13  14  397.31   23.63
  -7  13  15  175.13   17.53
  -7  13  16  207.46   18.52
  -7  13  17   98.59   13.03
  -7  13  18  113.94   14.90
  -7  13  19   23.40    8.77
  -7  13  20   42.55   10.67
  -7  14  -6  158.29   14.77
  -7  14  -5  240.52   18.10
  -7  14  -4  151.35   13.79
  -7  14  -3   94.12    7.96
  -7  14  -2   26.05    5.43
  -7  14  -1   24.67    4.80
  -7  14   0    5.21    3.32
  -7  14   1  272.29   14.69
  -7  14   2   27.22    2.88
  -7  14   3 1052.48   33.71
  -7  14   5 1372.41   42.96
  -7  14   6  678.73   29.77
  -7  14   7  827.00   30.53
  -7  14   8  416.09   23.98
  -7  14   9  757.23   32.20
  -7  14  10  323.09   19.60
  -7  14  11  202.78   16.95
  -7  14  12  101.84   13.28
  -7  14  13   27.55    8.28
  -7  14  14    0.07    5.74
  -7  14  15   33.02    7.82
  -7  14  16   69.32   11.15
  -7  14  17   72.42   13.12
  -7  14  18   85.47   13.15
  -7  14  19  100.81   13.40
  -7  15  -6   68.85   10.58
  -7  15  -5  450.32   25.61
  -7  15  -4    2.18    3.82
  -7  15  -3  883.40   34.44
  -7  15  -2   34.61    8.82
  -7  15  -1 1148.96   39.21
  -7  15   0   52.74    8.76
  -7  15   1  839.09   33.86
  -7  15   2   53.21    9.22
  -7  15   3  722.98   31.18
  -7  15   4  110.97   12.20
  -7  15   5   68.24    8.04
  -7  15   6   16.27    7.05
  -7  15   7   89.43   12.54
  -7  15   8    6.78    4.58
  -7  15   9  344.18   20.49
  -7  15  10   54.36    9.23
  -7  15  11  463.04   25.41
  -7  15  12   98.14   12.40
  -7  15  13  487.14   26.68
  -7  15  14   18.06    7.21
  -7  15  15  340.23   24.53
  -7  15  16    1.96    5.88
  -7  15  17  211.27   19.41
  -7  15  18    0.09    4.48
  -7  15  19   65.80   12.14
  -7  16  -6   26.78    7.57
  -7  16  -5  278.35   20.31
  -7  16  -4  281.29   19.37
  -7  16  -3  116.79   12.48
  -7  16  -2  260.98   18.26
  -7  16  -1   24.55    5.99
  -7  16   0  104.90   12.25
  -7  16   1  154.90   14.40
  -7  16   2  160.69   15.09
  -7  16   3  503.31   27.20
  -7  16   4   72.15   10.56
  -7  16   6   82.75    9.19
  -7  16   7  562.39   27.33
  -7  16   8    0.68    3.97
  -7  16   9  290.45   20.53
  -7  16  10   15.65    7.13
  -7  16  11  137.66   15.03
  -7  16  12    2.97    4.42
  -7  16  13   49.48    8.99
  -7  16  14   15.90    7.01
  -7  16  15    0.68    4.56
  -7  16  16   13.08    4.99
  -7  16  17   77.44   13.07
  -7  16  18    7.58    6.82
  -7  17  -6  475.51   27.25
  -7  17  -5   51.83    9.21
  -7  17  -4  317.15   20.56
  -7  17  -3   63.87   10.30
  -7  17  -2   61.15   11.76
  -7  17  -1  276.74   21.95
  -7  17   0    6.94    4.44
  -7  17   1  217.11   17.08
  -7  17   2    6.90    4.45
  -7  17   3  354.46   22.58
  -7  17   4   26.26    8.55
  -7  17   5   72.42   10.58
  -7  17   6   98.35   11.10
  -7  17   7    0.12    4.08
  -7  17   8   93.49   11.41
  -7  17   9   83.40   12.55
  -7  17  10   21.59    6.48
  -7  17  11  135.67   14.71
  -7  17  12    2.15    4.21
  -7  17  13  135.10   14.94
  -7  17  14   16.79    6.47
  -7  17  15   97.41   15.03
  -7  17  16   10.81    5.57
  -7  17  17   26.86    7.05
  -7  18  -6    8.79    5.47
  -7  18  -5   73.88   10.59
  -7  18  -4  117.89   14.02
  -7  18  -3  226.85   18.96
  -7  18  -2  144.36   15.84
  -7  18  -1  122.43   14.80
  -7  18   0  168.37   15.47
  -7  18   1   12.04    4.67
  -7  18   2  144.83   14.62
  -7  18   3    3.45    3.86
  -7  18   4   29.42    8.92
  -7  18   5    4.02    4.31
  -7  18   6    6.01    4.73
  -7  18   7   53.45    8.10
  -7  18   8    2.93    6.00
  -7  18   9    6.44    4.85
  -7  18  10    5.05    4.58
  -7  18  11    2.30    4.67
  -7  18  12    0.43    4.68
  -7  18  13    0.88    4.48
  -7  18  14    1.79    5.39
  -7  18  15    0.04    4.90
  -7  18  16    2.99    5.41
  -7  19  -6  121.57   14.09
  -7  19  -5  238.57   21.17
  -7  19  -4   31.61    9.76
  -7  19  -3  168.00   16.81
  -7  19  -2    9.94    5.33
  -7  19  -1   18.25    6.97
  -7  19   0   11.22    6.14
  -7  19   1    7.37    4.93
  -7  19   2   42.12    8.39
  -7  19   3   11.63    5.82
  -7  19   4   87.63   12.82
  -7  19   5    6.01    4.41
  -7  19   6    3.44    3.06
  -7  19   7    4.70    4.34
  -7  19   8    5.02    3.86
  -7  19   9    7.06    4.62
  -7  19  10    0.28    4.17
  -7  19  11    9.06    5.94
  -7  19  12    0.90    4.33
  -7  19  13    1.04    4.32
  -7  19  14    0.48    5.16
  -7  20  -6  125.67   15.14
  -7  20  -5   48.64    9.81
  -7  20  -4  103.17   13.21
  -7  20  -3  107.06   14.69
  -7  20  -2   33.73    8.23
  -7  20  -1  153.93   15.57
  -7  20   0    3.88    4.87
  -7  20   1  178.01   17.21
  -7  20   2   39.25    8.42
  -7  20   3  131.20   15.12
  -7  20   4   81.17   13.08
  -7  20   5   61.24   10.53
  -7  20   6  115.75    9.78
  -7  20   7   16.58    4.68
  -7  20   8  117.55   14.68
  -7  20   9   12.59    5.01
  -7  20  10   52.31   11.92
  -7  20  11    0.69    5.04
  -7  20  12   23.83    7.86
  -7  20  13    5.38    4.96
  -7  21  -6   85.10   12.54
  -7  21  -5  108.53   14.81
  -7  21  -4  166.00   18.61
  -7  21  -3   58.62   11.16
  -7  21  -2  335.88   26.05
  -7  21  -1   15.76    7.72
  -7  21   0  327.40   25.03
  -7  21   1   23.57    9.85
  -7  21   2  216.30   19.77
  -7  21   3   40.42    8.98
  -7  21   4   80.97   13.21
  -7  21   5   11.85    5.70
  -7  21   6    0.03    3.16
  -7  21   7    0.09    3.98
  -7  21   8   30.96    6.44
  -7  21   9    1.96    5.56
  -7  21  10   62.70   11.84
  -7  21  11   10.44    6.79
  -7  22  -4   49.14    9.52
  -7  22  -3   33.13    8.31
  -7  22  -2    0.03    5.99
  -7  22  -1   29.06    7.62
  -7  22   0   57.81   10.67
  -7  22   1    1.43    4.21
  -7  22   2  222.70   20.95
  -7  22   3   12.15    7.67
  -7  22   4  478.60   30.69
  -7  22   5   71.93   13.81
  -7  22   6  558.81   22.75
  -7  22   7   46.31    8.26
  -7  22   8  370.98   19.81
  -6   0  -4 3365.88   40.31
  -6   0  -2 1554.05   17.97
  -6   0   2  870.10   10.38
  -6   0   4 2614.83   26.36
  -6   0   6 4069.53   35.31
  -6   0   8 2235.32   44.02
  -6   0  10 1288.26   36.40
  -6   0  12  756.26   28.60
  -6   0  14  149.57   13.43
  -6   0  16    0.67    6.48
  -6   0  18    5.82    5.91
  -6   0  20    6.41    5.05
  -6   0  22   11.27    5.21
  -6   0  24    0.00    6.79
  -6   1  -5    0.24    1.21
  -6   1  -4 1512.93   21.41
  -6   1  -3   46.00    1.38
  -6   1  -2 3591.87   20.21
  -6   1   0 2486.49   16.42
  -6   1   1  132.27    2.68
  -6   1   2 2180.54    8.82
  -6   1   3  234.38    2.89
  -6   1   4  928.27   11.84
  -6   1   5  223.22    4.20
  -6   1   6  250.05    4.98
  -6   1   7  143.38    5.14
  -6   1   8   82.44    4.88
  -6   1   9   43.72    4.61
  -6   1  10  243.42   25.75
  -6   1  11    2.89    1.63
  -6   1  12  404.14   31.86
  -6   1  13    0.05    1.95
  -6   1  14  247.03    7.92
  -6   1  15    3.74    2.51
  -6   1  16   26.68    4.32
  -6   1  17   21.45    4.34
  -6   1  18   10.39    3.01
  -6   1  19   30.96    4.77
  -6   1  20    0.96    4.28
  -6   1  21   17.15    3.64
  -6   1  22    0.22    4.59
  -6   1  23   28.55    5.42
  -6   1  24    0.09    4.42
  -6   2  -5 1160.96   17.68
  -6   2  -4 1012.88   15.08
  -6   2  -3  688.90   10.41
  -6   2  -2  396.49    8.23
  -6   2  -1   14.01    0.72
  -6   2   0   47.31    1.19
  -6   2   1   20.69    1.16
  -6   2   2 1152.50   15.94
  -6   2   4 1054.17    8.47
  -6   2   5  329.71    6.99
  -6   2   6 2079.76   21.12
  -6   2   7  624.36   11.88
  -6   2   8  953.33   22.69
  -6   2   9  365.72   10.40
  -6   2  10  140.23    5.17
  -6   2  11  531.97    9.00
  -6   2  12   30.13    1.75
  -6   2  13  392.00    9.89
  -6   2  14   31.06    2.29
  -6   2  15  219.10   10.29
  -6   2  16  254.64    7.95
  -6   2  17  104.47    8.95
  -6   2  18  175.90   12.85
  -6   2  19   30.87    5.04
  -6   2  20   34.56    5.70
  -6   2  21    0.04    6.28
  -6   2  22   10.64    5.05
  -6   2  23    0.12    3.81
  -6   2  24    4.46    3.62
  -6   3  -5    4.85    0.59
  -6   3  -4  548.93    9.09
  -6   3  -3   30.93    2.76
  -6   3  -2  369.01    5.86
  -6   3  -1 1107.79    8.08
  -6   3   0  240.79    3.73
  -6   3   1 1269.62    8.88
  -6   3   2   29.54    1.38
  -6   3   3  474.80    7.99
  -6   3   4  209.36    3.91
  -6   3   5  963.69    8.58
  -6   3   6  545.47   11.95
  -6   3   7  926.37   16.53
  -6   3   8  566.42   13.88
  -6   3   9  511.65   21.15
  -6   3  10  292.99   11.20
  -6   3  11  170.57   11.00
  -6   3  12  281.59    7.97
  -6   3  13   79.44    5.10
  -6   3  14  113.53    5.38
  -6   3  15   26.54    3.76
  -6   3  16   10.26    4.34
  -6   3  17  140.53   22.26
  -6   3  18   43.31    7.75
  -6   3  19  106.00    8.87
  -6   3  20  177.81   11.41
  -6   3  21  102.74   10.45
  -6   3  22  161.38   21.84
  -6   3  23   99.98    9.30
  -6   3  24   87.70   11.68
  -6   4  -5  313.24    5.28
  -6   4  -4    3.67    1.35
  -6   4  -3  590.78    9.33
  -6   4  -2  608.64    7.76
  -6   4  -1    0.60    1.00
  -6   4   0 1446.31   19.03
  -6   4   1   48.11    2.40
  -6   4   2 1966.87   23.61
  -6   4   4  791.51   12.14
  -6   4   5    2.03    1.59
  -6   4   6  228.92    5.66
  -6   4   7  179.61    5.72
  -6   4   8   71.77   12.11
  -6   4   9   79.34    4.60
  -6   4  10  188.93    9.23
  -6   4  11  177.97    8.32
  -6   4  12  233.95    7.33
  -6   4  13  103.75    4.72
  -6   4  14  491.22   11.57
  -6   4  15  166.66   21.01
  -6   4  16  743.62   22.19
  -6   4  17  153.84   10.53
  -6   4  18  415.09   17.40
  -6   4  19   82.61    7.41
  -6   4  20  118.46   10.21
  -6   4  21   11.97    4.77
  -6   4  22    8.09    4.72
  -6   4  23    4.09    6.80
  -6   4  24   16.83    7.57
  -6   5  -5   65.55    2.71
  -6   5  -4  299.77    8.00
  -6   5  -3  228.04    5.78
  -6   5  -2   19.20    2.50
  -6   5  -1  127.62    5.64
  -6   5   0   76.51    4.91
  -6   5   1  267.74    6.44
  -6   5   2  759.85    9.69
  -6   5   3   20.89    1.48
  -6   5   4 1163.67   24.51
  -6   5   5    4.52    3.12
  -6   5   6 1268.66   14.87
  -6   5   7    3.53    1.89
  -6   5   8 1375.90   36.75
  -6   5   9   67.94    4.77
  -6   5  10  753.37   26.82
  -6   5  11   23.09    5.41
  -6   5  12  326.01   18.39
  -6   5  13   36.13    3.29
  -6   5  14    4.43    3.11
  -6   5  15   27.15    4.04
  -6   5  16   45.40    7.70
  -6   5  17   18.41    4.32
  -6   5  18  153.87   13.83
  -6   5  19    4.35    5.24
  -6   5  20  158.36   18.20
  -6   5  21    2.19    4.45
  -6   5  22  219.74   19.97
  -6   5  23    3.98    6.25
  -6   5  24  201.36   20.70
  -6   6  -5  528.68   19.63
  -6   6  -4    9.56    1.81
  -6   6  -3   70.39    3.89
  -6   6  -2  374.17    7.72
  -6   6  -1  534.91   15.74
  -6   6   0 1882.12   28.20
  -6   6   1  241.61    4.49
  -6   6   2 1728.65   41.20
  -6   6   3   12.13    1.41
  -6   6   4  339.15   10.94
  -6   6   5  157.56    4.09
  -6   6   6  162.49    4.15
  -6   6   7   20.94    2.09
  -6   6   8    6.95    1.93
  -6   6   9  164.32   11.26
  -6   6  10  198.58   15.23
  -6   6  11   29.49    3.82
  -6   6  12  445.98   31.22
  -6   6  13   27.94    6.64
  -6   6  14  595.99   29.87
  -6   6  15   23.72    1.88
  -6   6  16  653.48   28.98
  -6   6  17   13.15    5.47
  -6   6  18  367.05   24.65
  -6   6  19    5.42    4.79
  -6   6  20  112.98   13.03
  -6   6  21    0.83    4.44
  -6   6  22    4.39    5.05
  -6   6  23    0.16    4.66
  -6   6  24   15.85    7.49
  -6   7  -5  208.39   13.71
  -6   7  -4  354.92   16.82
  -6   7  -3  887.83   24.00
  -6   7  -2  614.85   24.64
  -6   7  -1 1252.40   31.63
  -6   7   0  479.46   10.08
  -6   7   1 1885.35   25.95
  -6   7   2   74.44    5.86
  -6   7   3  963.55   17.09
  -6   7   4   58.70    2.68
  -6   7   5  681.39   12.43
  -6   7   6  571.84   13.36
  -6   7   7  529.33   11.58
  -6   7   8  806.21   30.99
  -6   7   9  128.00    8.32
  -6   7  10  381.16   12.14
  -6   7  11    7.21    5.72
  -6   7  12  396.17   43.42
  -6   7  13   50.52    8.45
  -6   7  14   85.72   15.37
  -6   7  15   45.52    3.27
  -6   7  16    3.23    3.89
  -6   7  17   99.82   12.59
  -6   7  18   51.58    9.28
  -6   7  19   44.50    9.06
  -6   7  20  111.70   13.60
  -6   7  21   32.93    7.38
  -6   7  22  145.64   16.02
  -6   7  23   36.97   10.33
  -6   8  -5 1275.56   37.83
  -6   8  -4  404.20   19.39
  -6   8  -3  298.08   16.72
  -6   8  -2  109.50    8.97
  -6   8  -1  271.87   10.87
  -6   8   0   19.55    4.07
  -6   8   1   71.48    6.82
  -6   8   2  245.24   13.10
  -6   8   3   50.53    6.88
  -6   8   4 1301.58   39.89
  -6   8   5  312.80    8.22
  -6   8   6 1219.17   19.14
  -6   8   7  192.36    7.98
  -6   8   8  234.48   11.81
  -6   8   9  545.71   15.30
  -6   8  10  100.72    6.24
  -6   8  11  222.13   14.57
  -6   8  12   14.31    6.50
  -6   8  13   29.84    3.16
  -6   8  14   72.99    4.63
  -6   8  15   10.38    5.11
  -6   8  16   73.01    9.90
  -6   8  17   21.87    7.13
  -6   8  18   75.80   11.28
  -6   8  19   12.66    5.77
  -6   8  20   26.62    7.21
  -6   8  21    0.13    4.17
  -6   8  22    0.57    4.58
  -6   8  23    0.13    5.07
  -6   9  -5   47.32    5.43
  -6   9  -4 1308.86   34.53
  -6   9  -3  277.21   16.46
  -6   9  -2 1874.06   43.04
  -6   9  -1  693.23   14.77
  -6   9   0 1904.86  193.36
  -6   9   1  529.19   22.85
  -6   9   4  935.82   25.34
  -6   9   5  437.23   10.48
  -6   9   6   44.81    3.06
  -6   9   7  105.53    7.53
  -6   9   8   45.94    4.94
  -6   9   9   33.25    5.09
  -6   9  10   27.92    6.14
  -6   9  11   93.38    9.68
  -6   9  12  242.06   16.37
  -6   9  13   13.28    6.64
  -6   9  14  319.68    9.55
  -6   9  15   19.11    4.75
  -6   9  16   96.16   12.84
  -6   9  17   47.81    9.92
  -6   9  18    1.09    3.96
  -6   9  19   15.88    6.10
  -6   9  20    5.91    5.45
  -6   9  21    6.95    5.03
  -6   9  22    0.00    5.38
  -6   9  23    1.63    7.13
  -6  10  -5   13.17    7.22
  -6  10  -4 1532.73   41.67
  -6  10  -3   18.86    4.95
  -6  10  -2  658.50   22.54
  -6  10  -1   33.79    3.86
  -6  10   0    0.21    0.82
  -6  10   1   69.61    3.69
  -6  10   2  133.08    7.70
  -6  10   4  855.74   25.96
  -6  10   5   51.14    3.63
  -6  10   6 1053.26   19.41
  -6  10   7    4.50    1.97
  -6  10   8  743.18   18.22
  -6  10   9   47.36    4.57
  -6  10  10  441.91   21.09
  -6  10  11    4.51    4.79
  -6  10  12  327.65   22.20
  -6  10  13  130.80   14.19
  -6  10  14   32.90    6.33
  -6  10  15   42.49    7.35
  -6  10  16    0.02    4.25
  -6  10  17    9.51    5.29
  -6  10  18   24.20    6.28
  -6  10  19   14.89    5.37
  -6  10  20    0.00    4.55
  -6  10  21    5.66    4.20
  -6  10  22    0.13    5.83
  -6  11  -5   96.36   11.39
  -6  11  -4  692.73   28.42
  -6  11  -3    6.57    5.78
  -6  11  -2 1517.23   23.64
  -6  11  -1   11.95    3.59
  -6  11   0 1711.29   35.14
  -6  11   1   19.48    6.41
  -6  11   2 1011.52   17.84
  -6  11   5  344.29   18.00
  -6  11   6  115.71    8.28
  -6  11   7  360.27   11.75
  -6  11   8   79.22    6.54
  -6  11   9  285.88   19.16
  -6  11  10  334.14   18.13
  -6  11  11  117.89    9.63
  -6  11  12  326.45   19.64
  -6  11  13    7.68    6.20
  -6  11  14  150.69   14.49
  -6  11  15    2.60    4.19
  -6  11  16  100.81   11.25
  -6  11  17    1.48    4.93
  -6  11  18   17.22    6.37
  -6  11  19   15.03    5.71
  -6  11  20    1.86    4.51
  -6  11  21   52.52   11.44
  -6  11  22    0.04    6.36
  -6  12  -5  154.11   12.22
  -6  12  -4  324.06   16.83
  -6  12  -3  171.01   12.97
  -6  12  -2  116.32    7.17
  -6  12  -1   73.60    4.56
  -6  12   0   25.99    2.48
  -6  12   1   12.22    1.48
  -6  12   2  334.48   12.82
  -6  12   3  153.31    9.70
  -6  12   5   23.97    4.88
  -6  12   6  107.61   16.18
  -6  12   7  212.49   20.09
  -6  12   8  113.20   13.56
  -6  12   9  256.38   16.60
  -6  12  10   89.16   11.65
  -6  12  11  279.11   16.94
  -6  12  12   29.47    6.29
  -6  12  13  665.25   29.29
  -6  12  14    8.63    4.15
  -6  12  15  345.50   22.32
  -6  12  16   18.46    5.29
  -6  12  17  172.39   16.61
  -6  12  18   74.03   12.02
  -6  12  19   93.50   13.02
  -6  12  20   18.23    7.37
  -6  12  21   21.13    8.27
  -6  13  -5   10.68    4.25
  -6  13  -4  211.42   16.65
  -6  13  -3    0.36    3.04
  -6  13  -2  128.72    5.49
  -6  13  -1   30.76    3.42
  -6  13   0  169.66    7.28
  -6  13   1   83.11    7.30
  -6  13   2   27.93    2.41
  -6  13   3  279.53   10.61
  -6  13   4   58.81    4.42
  -6  13   6   70.71    8.89
  -6  13   7  391.19   17.55
  -6  13   8  130.75   13.12
  -6  13   9  281.50   19.26
  -6  13  10  349.10   21.12
  -6  13  11   97.09   10.66
  -6  13  12  231.71   17.58
  -6  13  13   38.21    8.95
  -6  13  14   44.00    8.44
  -6  13  15    0.44    5.73
  -6  13  16    6.20    4.65
  -6  13  17   53.10    9.28
  -6  13  18   24.62    8.62
  -6  13  19  125.99   16.67
  -6  13  20   73.03   12.86
  -6  14  -5   23.66    3.96
  -6  14  -4   37.50    6.39
  -6  14  -3   15.20    3.88
  -6  14  -2  198.20    8.39
  -6  14  -1   41.14    4.91
  -6  14   0  295.73   10.30
  -6  14   1   21.98    3.30
  -6  14   2  494.90   13.61
  -6  14   3  127.05    6.40
  -6  14   4  189.50   10.04
  -6  14   6   15.78    7.30
  -6  14   7   11.57    3.66
  -6  14   8   24.71    8.28
  -6  14   9   10.81    5.07
  -6  14  10  275.44   18.83
  -6  14  11   17.76    7.01
  -6  14  12  372.28   23.36
  -6  14  13  211.45   16.85
  -6  14  14  325.40   21.60
  -6  14  15  126.52   14.23
  -6  14  16  282.02   21.59
  -6  14  17  104.40   13.64
  -6  14  18  189.83   17.66
  -6  14  19   48.34   10.73
  -6  14  20   66.38   12.68
  -6  15  -5  169.88   15.58
  -6  15  -4   32.15    5.42
  -6  15  -3  287.41   10.39
  -6  15  -2   32.55    3.24
  -6  15  -1  177.80    8.26
  -6  15   0    2.24    1.85
  -6  15   1  234.95    8.75
  -6  15   2  207.82    9.13
  -6  15   3   68.42    7.67
  -6  15   4  390.32   14.92
  -6  15   5   10.04    5.13
  -6  15   6  439.76   22.32
  -6  15   7   12.04    6.10
  -6  15   8  581.52   26.56
  -6  15   9   98.13   10.79
  -6  15  10  432.34   23.93
  -6  15  11  205.36   17.12
  -6  15  12  111.66   13.88
  -6  15  13   55.44   10.03
  -6  15  14    0.40    5.05
  -6  15  15   10.98    5.09
  -6  15  16   11.27    4.62
  -6  15  17    0.09    6.48
  -6  15  18   90.73   13.36
  -6  15  19    5.42    5.44
  -6  16  -5  298.44   19.84
  -6  16  -4   23.98    3.45
  -6  16  -3  162.01    8.65
  -6  16  -2  168.70    8.03
  -6  16  -1  167.52   10.45
  -6  16   0  200.76    8.82
  -6  16   1   23.36    5.66
  -6  16   2  593.44   49.50
  -6  16   3  373.10   13.37
  -6  16   4  118.13    7.68
  -6  16   5  441.19   16.46
  -6  16   7  237.09   17.80
  -6  16   8   16.66    5.39
  -6  16   9  248.75   17.46
  -6  16  10  109.34   12.76
  -6  16  11   91.59   12.10
  -6  16  12  288.43   21.89
  -6  16  13    0.04    5.63
  -6  16  14  194.74   16.50
  -6  16  15    0.08    4.58
  -6  16  16  165.65   17.43
  -6  16  17    0.98    5.48
  -6  16  18  108.08   13.99
  -6  17  -5  233.20   18.61
  -6  17  -4  218.27   18.99
  -6  17  -3  365.45   23.19
  -6  17  -2  199.30   16.15
  -6  17  -1  353.84   22.52
  -6  17   0   83.16   11.40
  -6  17   1  840.68   20.16
  -6  17   2   38.93   17.14
  -6  17   3  627.33   22.23
  -6  17   4    3.25    3.74
  -6  17   5  266.58   15.46
  -6  17   7   70.01   10.56
  -6  17   8   85.97   12.15
  -6  17   9    0.11    3.97
  -6  17  10  136.53   14.17
  -6  17  11    8.24    6.12
  -6  17  12  162.47   15.95
  -6  17  13   40.13    8.04
  -6  17  14   45.60   10.10
  -6  17  15   44.70    9.28
  -6  17  16    0.06    4.71
  -6  17  17   27.17    8.52
  -6  18  -5  569.81   30.56
  -6  18  -4  125.02   13.94
  -6  18  -3  211.08   15.98
  -6  18  -2   13.37    5.34
  -6  18  -1   97.11   12.55
  -6  18   0    6.18    4.73
  -6  18   1    5.76    5.08
  -6  18   2  150.80   14.72
  -6  18   3  139.41   12.32
  -6  18   4  232.98   19.31
  -6  18   5  377.34   27.21
  -6  18   7  320.90   20.33
  -6  18   8   62.32   10.54
  -6  18   9  249.89   19.64
  -6  18  10   52.24    9.95
  -6  18  11  133.99   14.37
  -6  18  12    5.27    5.75
  -6  18  13   51.82    8.98
  -6  18  14    4.12    4.19
  -6  18  15    0.00    5.06
  -6  18  16    9.85    5.40
  -6  19  -5   87.99   12.73
  -6  19  -4  218.64   17.59
  -6  19  -3  250.76   19.68
  -6  19  -2  502.33   27.95
  -6  19  -1  204.94   18.17
  -6  19   0  603.85   31.07
  -6  19   1  220.57   18.91
  -6  19   2  662.04   33.09
  -6  19   3   97.30   11.72
  -6  19   4  404.92   24.21
  -6  19   5   37.84    8.41
  -6  19   6   17.53    6.26
  -6  19   7    2.85    4.03
  -6  19   8    1.77    3.96
  -6  19   9   29.77    5.80
  -6  19  10    4.09    4.86
  -6  19  11   36.16    9.73
  -6  19  12   47.78    9.03
  -6  19  13   17.72    6.04
  -6  19  14   69.03   11.28
  -6  19  15   21.17    8.48
  -6  20  -5   49.03    9.49
  -6  20  -4  451.47   27.47
  -6  20  -3    4.04    6.01
  -6  20  -2  125.40   12.92
  -6  20  -1    0.95    6.94
  -6  20   0   14.79    6.96
  -6  20   1  100.51   13.07
  -6  20   2   84.16   10.92
  -6  20   3  206.81   19.13
  -6  20   4  204.05   18.88
  -6  20   5  108.03   12.08
  -6  20   6  222.15   20.76
  -6  20   7   23.51    8.33
  -6  20   8  180.56   17.98
  -6  20   9   20.38    6.37
  -6  20  10  202.94   17.78
  -6  20  11   12.80    7.25
  -6  20  12   84.47   13.39
  -6  20  13   31.11    9.20
  -6  21  -5   30.57    8.19
  -6  21  -4   84.40   13.15
  -6  21  -3   57.59   11.56
  -6  21  -2  198.10   19.80
  -6  21  -1   25.80    7.25
  -6  21   0  343.09   22.52
  -6  21   1   12.03    6.01
  -6  21   2  277.81   22.11
  -6  21   3  106.14   13.34
  -6  21   4  117.08   16.48
  -6  21   5  199.33   19.34
  -6  21   6   48.69   10.14
  -6  21   7  286.11   16.05
  -6  21   8    3.40    6.11
  -6  21   9  222.04   19.42
  -6  21  10   59.03   10.99
  -6  21  11  175.32   18.74
  -6  21  12   41.32   10.18
  -6  22  -5   41.47    8.15
  -6  22  -4   35.16    7.69
  -6  22  -3   58.24   10.68
  -6  22  -2    3.05    4.38
  -6  22  -1   82.54   12.50
  -6  22   0   20.20    6.75
  -6  22   1  113.24   14.81
  -6  22   2   67.77   11.29
  -6  22   3  104.74   13.80
  -6  22   4   59.11   11.15
  -6  22   5   83.63   13.66
  -6  22   6   22.63    5.44
  -6  22   7    1.79    3.95
  -6  22   8   11.45    3.95
  -6  22   9    9.33    6.52
  -6  23  -3    0.78    5.94
  -6  23  -2    0.09    6.02
  -6  23  -1    2.78    4.30
  -6  23   0    0.17    4.99
  -6  23   1    0.76    6.92
  -6  23   2   14.93    7.06
  -6  23   3   58.34   12.18
  -6  23   4   80.96   13.05
  -6  23   5  154.12   19.18
  -6  23   6   49.89    9.95
  -5   0  -3  385.06   12.38
  -5   0  -1  906.61    9.07
  -5   0   1 3596.21   33.71
  -5   0   3 2492.15   24.20
  -5   0   5 1108.55   15.29
  -5   0   7  447.26   17.19
  -5   0   9    7.32    3.99
  -5   0  11  231.25   15.26
  -5   0  13 1167.52   39.38
  -5   0  15  787.00   31.34
  -5   0  17  416.80   24.25
  -5   0  19  251.62   19.84
  -5   0  21   52.05    9.60
  -5   0  23   16.51    7.32
  -5   0  25    0.17    4.59
  -5   1  -4  193.54    4.13
  -5   1  -3 3782.03   29.23
  -5   1  -2    6.12    1.61
  -5   1  -1 1585.87   17.86
  -5   1   0   59.34    2.15
  -5   1   2   12.31    0.65
  -5   1   3  311.51    5.49
  -5   1   4  377.53    5.22
  -5   1   5 2571.69   40.48
  -5   1   6  191.08    5.16
  -5   1   7 2509.23   63.40
  -5   1   8  122.31   10.02
  -5   1   9 2108.13   23.77
  -5   1  10  319.38    6.51
  -5   1  11 1787.72   24.48
  -5   1  12  275.00   10.15
  -5   1  13  402.93   11.27
  -5   1  14   83.84    5.12
  -5   1  15   63.92    7.80
  -5   1  16    1.44    2.15
  -5   1  17   95.66    9.36
  -5   1  18    7.23    5.53
  -5   1  19  110.35    8.52
  -5   1  20    0.54    3.83
  -5   1  21  133.01   12.35
  -5   1  22    5.61    3.84
  -5   1  23   35.21    6.07
  -5   1  24    6.27    3.72
  -5   2  -4  105.01    3.08
  -5   2  -3  748.90    8.42
  -5   2  -2  843.01   18.24
  -5   2  -1 1532.55    9.74
  -5   2   0 1962.76   13.82
  -5   2   1 1707.73   18.56
  -5   2   2 1082.11   11.44
  -5   2   4  882.06   11.00
  -5   2   5 1119.35   17.95
  -5   2   6  656.58   12.75
  -5   2   7  464.75   11.13
  -5   2   8  398.40   13.48
  -5   2   9   46.21    3.75
  -5   2  10   28.73    3.03
  -5   2  11  155.69    5.62
  -5   2  12   31.31    2.09
  -5   2  13  398.85    9.54
  -5   2  14   64.35    3.86
  -5   2  15  472.62   16.48
  -5   2  16  216.17   13.18
  -5   2  17  367.20   16.19
  -5   2  18  176.37   24.02
  -5   2  19   80.47    7.98
  -5   2  20  134.83   10.28
  -5   2  21    1.38    3.52
  -5   2  22  109.67   10.51
  -5   2  23    4.37    3.44
  -5   2  24   46.93    6.75
  -5   3  -4  672.61    8.76
  -5   3  -3 1806.93   15.94
  -5   3  -2  131.19    2.88
  -5   3   2   74.72    5.70
  -5   3   3    0.29    1.04
  -5   3   4    5.86    0.85
  -5   3   5  177.66    5.57
  -5   3   6  661.79   16.98
  -5   3   7  273.53   15.18
  -5   3   8 1039.29   21.86
  -5   3   9  187.80   14.21
  -5   3  10  346.68   13.48
  -5   3  11   16.64    2.49
  -5   3  12   94.16    4.55
  -5   3  13    8.02    3.89
  -5   3  14  166.00    7.44
  -5   3  15    8.31    2.21
  -5   3  16   52.79    4.88
  -5   3  17  133.13   11.05
  -5   3  18   38.98    6.63
  -5   3  19  130.97    9.60
  -5   3  20    0.60    2.98
  -5   3  21   84.87    9.22
  -5   3  22    5.81    3.11
  -5   3  23    7.04    3.72
  -5   3  24   15.90    5.90
  -5   4  -4    4.92    1.76
  -5   4  -3  156.14    4.67
  -5   4  -2  919.89    8.67
  -5   4  -1   96.44    3.86
  -5   4   0  717.57   17.73
  -5   4   1   38.72    1.46
  -5   4   4  617.51   21.21
  -5   4   5   29.97    0.90
  -5   4   6  290.48    6.55
  -5   4   7   57.25    6.50
  -5   4   8   27.61    7.36
  -5   4   9   77.78   11.16
  -5   4  10    0.15    1.21
  -5   4  11  168.88    7.73
  -5   4  12   10.70    1.00
  -5   4  13   76.62    2.83
  -5   4  14    3.16    1.15
  -5   4  15   27.56    2.10
  -5   4  16   79.13    2.96
  -5   4  17    1.81    2.07
  -5   4  18   55.88   11.94
  -5   4  19   15.08    4.68
  -5   4  20    1.12    3.36
  -5   4  21   70.48   10.51
  -5   4  22    8.93    3.79
  -5   4  23  100.53   14.54
  -5   4  24   25.47    8.08
  -5   5  -4    5.44    2.84
  -5   5  -3  301.10    6.14
  -5   5  -2  188.40    4.39
  -5   5  -1   78.40    9.29
  -5   5   0  218.14    8.51
  -5   5   1   88.43   10.71
  -5   5   2   57.07    2.37
  -5   5   3  413.57    5.51
  -5   5   4   61.96    1.37
  -5   5   5  204.52    8.02
  -5   5   6   43.00    5.51
  -5   5   7    1.53    2.63
  -5   5   8   55.75    2.89
  -5   5   9   10.53    6.67
  -5   5  10   19.24    1.83
  -5   5  11   25.75    5.97
  -5   5  12   20.39    1.39
  -5   5  13  179.18    5.84
  -5   5  14    0.11    1.12
  -5   5  15  424.73    8.55
  -5   5  16    1.08    1.40
  -5   5  17  446.74   24.69
  -5   5  18    0.89    6.43
  -5   5  19  174.80   18.22
  -5   5  20    3.33    4.67
  -5   5  21   41.72    7.81
  -5   5  22   18.92    7.65
  -5   5  23    1.01    5.84
  -5   5  24    4.00    5.00
  -5   6  -4  397.07   17.47
  -5   6  -3   52.29    6.90
  -5   6  -2  232.95    7.24
  -5   6  -1  136.11    6.02
  -5   6   0 2553.66   39.89
  -5   6   1   37.12    2.33
  -5   6   2 2030.73   37.56
  -5   6   3  150.10   31.05
  -5   6   4 1174.94   16.13
  -5   6   5   74.48    7.42
  -5   6   6  864.46   17.19
  -5   6   7  258.34   10.37
  -5   6   8  184.44    8.84
  -5   6   9   44.37    6.03
  -5   6  10   77.82    6.17
  -5   6  11  373.51   19.97
  -5   6  12   94.49    8.65
  -5   6  13  258.67   12.46
  -5   6  14  155.79    5.17
  -5   6  15   63.95    4.68
  -5   6  16  157.62    6.35
  -5   6  17    0.01    4.16
  -5   6  18  108.61   12.99
  -5   6  19   17.51    6.07
  -5   6  20   18.84    5.94
  -5   6  21   54.30   10.31
  -5   6  22    1.63    5.13
  -5   6  23   90.13   13.46
  -5   6  24    0.11    4.74
  -5   7  -4  938.92   27.91
  -5   7  -3 1023.58   30.15
  -5   7  -2  433.96   12.22
  -5   7  -1  205.37    4.94
  -5   7   0  161.51    6.47
  -5   7   1   83.75    3.02
  -5   7   3  113.90    3.62
  -5   7   4  448.99    9.70
  -5   7   5  141.30    6.20
  -5   7   6  682.90   14.15
  -5   7   7  286.93    8.63
  -5   7   8 1382.69   28.28
  -5   7   9  749.39   18.26
  -5   7  10  965.61   20.78
  -5   7  11  106.63    8.33
  -5   7  12  331.85   14.31
  -5   7  13    3.94    1.92
  -5   7  14  124.08    6.08
  -5   7  15   15.76    4.25
  -5   7  16  104.11    5.73
  -5   7  17   59.69    9.44
  -5   7  18   24.86    6.37
  -5   7  19  110.00   13.32
  -5   7  20    0.52    5.38
  -5   7  21   63.31   11.20
  -5   7  22   31.34    9.08
  -5   7  23   16.82    6.88
  -5   8  -4  665.36   24.56
  -5   8  -3  340.30   13.94
  -5   8  -2  366.57   18.80
  -5   8  -1 1290.16   25.23
  -5   8   0 1762.36   53.27
  -5   8   1 1838.75   65.55
  -5   8   2 1671.35   27.08
  -5   8   4 1205.19   21.32
  -5   8   5  930.92   17.16
  -5   8   6  588.24   13.84
  -5   8   7   38.68    4.54
  -5   8   8  268.31   11.11
  -5   8   9   37.64    4.23
  -5   8  10    1.66    4.43
  -5   8  11  206.56   15.98
  -5   8  12  119.65   11.10
  -5   8  13  479.15   11.49
  -5   8  14  247.37    8.11
  -5   8  15  414.88   15.27
  -5   8  16  277.63    8.91
  -5   8  17  296.03   20.40
  -5   8  18  165.05   15.22
  -5   8  19   73.82   11.45
  -5   8  20   72.33   12.06
  -5   8  21    9.90    7.48
  -5   8  22   40.34    9.34
  -5   8  23   20.04    6.77
  -5   9  -4  525.25   19.55
  -5   9  -3 1739.28   40.51
  -5   9  -2  273.85   17.59
  -5   9  -1  704.28   14.13
  -5   9   0   48.51    3.98
  -5   9   1   71.86    2.27
  -5   9   2    0.08    1.55
  -5   9   3  306.61   10.25
  -5   9   4  256.23    9.47
  -5   9   5 1751.20   66.41
  -5   9   6  187.49   10.82
  -5   9   7 1889.67   26.68
  -5   9   8  289.68   11.64
  -5   9   9 2049.55   49.03
  -5   9  10  445.52   23.70
  -5   9  11 1155.54   34.83
  -5   9  12  186.62   13.50
  -5   9  13  422.66   23.27
  -5   9  14   19.30    4.31
  -5   9  15   67.61    5.73
  -5   9  16    1.28    1.69
  -5   9  17   22.58    7.36
  -5   9  18    4.57    5.23
  -5   9  19   73.68   12.99
  -5   9  20    9.63    6.73
  -5   9  21   71.57   10.33
  -5   9  22   22.27    7.25
  -5   9  23   58.05   11.65
  -5  10  -4    0.02    2.63
  -5  10  -3  919.80   29.98
  -5  10  -2   53.38    5.12
  -5  10  -1 1706.09   26.30
  -5  10   0   84.27    4.29
  -5  10   1 2710.31   32.06
  -5  10   2   63.04    3.48
  -5  10   3 2391.65   43.28
  -5  10   5 1101.78   50.89
  -5  10   6   33.53    2.98
  -5  10   7   94.60    6.31
  -5  10   8   13.86    2.36
  -5  10   9    3.09    3.12
  -5  10  10    7.68    6.78
  -5  10  11  113.39   11.03
  -5  10  12   99.91    9.03
  -5  10  13  503.84   25.01
  -5  10  14   47.04    8.26
  -5  10  15  526.43   26.23
  -5  10  16    6.91    4.59
  -5  10  17  316.35   21.24
  -5  10  18    0.65    4.31
  -5  10  19  162.99   15.49
  -5  10  20    0.04    5.97
  -5  10  21   63.36   10.95
  -5  10  22    9.68    4.97
  -5  11  -4   15.20    4.57
  -5  11  -3 1243.76   38.16
  -5  11  -2   15.97    4.36
  -5  11  -1  739.15   13.30
  -5  11   0    0.27    2.63
  -5  11   1   11.19    1.71
  -5  11   2    6.31    4.37
  -5  11   3  211.87   10.85
  -5  11   4   21.11    2.64
  -5  11   5  844.47   22.90
  -5  11   6   56.51    5.83
  -5  11   7 1011.70   34.84
  -5  11   8  113.60    7.23
  -5  11   9  980.17   32.05
  -5  11  10  145.76   14.39
  -5  11  11  851.35   32.48
  -5  11  12  252.55   16.48
  -5  11  13  291.16   20.54
  -5  11  14   87.60   11.82
  -5  11  15   51.16    8.16
  -5  11  16   23.17    6.47
  -5  11  17   20.11    6.57
  -5  11  18   27.07    7.88
  -5  11  19   25.85    7.16
  -5  11  20   22.75    7.96
  -5  11  21   69.31   12.47
  -5  11  22    1.90    5.63
  -5  12  -4   58.84    9.00
  -5  12  -3  203.73   12.83
  -5  12  -2  176.01    6.52
  -5  12  -1  470.01   11.37
  -5  12   0  468.57   12.26
  -5  12   1  658.02   15.41
  -5  12   2    9.79    2.16
  -5  12   3  278.03   10.64
  -5  12   4   10.63    2.66
  -5  12   5  223.11   10.82
  -5  12   6  134.88    9.26
  -5  12   7   88.29    6.67
  -5  12   8  276.43   15.79
  -5  12   9  133.47   12.40
  -5  12  10    8.87    5.86
  -5  12  11  316.40   20.51
  -5  12  12    0.75    4.15
  -5  12  13  209.71   16.98
  -5  12  14   14.12    4.19
  -5  12  15  107.87   12.89
  -5  12  16   24.78    7.53
  -5  12  17  104.65   13.56
  -5  12  18   37.57    7.88
  -5  12  19   38.90    9.04
  -5  12  20  108.25   13.78
  -5  12  21    4.12    5.72
  -5  13  -4   26.99    7.26
  -5  13  -3  263.87   16.29
  -5  13  -2    7.51    2.49
  -5  13  -1   68.69    5.13
  -5  13   0  127.29    6.89
  -5  13   1    0.07    1.84
  -5  13   2   52.49    3.88
  -5  13   3    4.13    2.19
  -5  13   4    3.28    2.48
  -5  13   5    4.62    2.51
  -5  13   6   17.08    3.55
  -5  13   7    9.84    8.21
  -5  13   8   86.00   10.98
  -5  13   9   48.61    6.48
  -5  13  10  133.50   11.76
  -5  13  11   26.35    7.72
  -5  13  12  260.88   20.11
  -5  13  13    0.03    4.55
  -5  13  14   78.35   11.14
  -5  13  15    2.34    4.09
  -5  13  16   61.18    9.44
  -5  13  17   76.87   11.49
  -5  13  18   61.93   10.24
  -5  13  19   71.88   11.67
  -5  13  20   24.39    8.39
  -5  13  21   42.61   10.00
  -5  14  -4   82.24    8.22
  -5  14  -3   46.53    5.68
  -5  14  -2   28.28    2.63
  -5  14  -1   12.54    3.61
  -5  14   0   21.07    7.37
  -5  14   1    1.00    3.15
  -5  14   2   22.86    3.00
  -5  14   3    7.17    2.70
  -5  14   4   44.70    5.47
  -5  14   5    2.97    2.20
  -5  14   6    2.81    2.06
  -5  14   7   10.53    5.02
  -5  14   8    3.05    3.47
  -5  14   9   33.31    5.80
  -5  14  10    3.03    4.01
  -5  14  11   23.51    4.36
  -5  14  12   43.07    8.68
  -5  14  13    2.41    5.10
  -5  14  14   53.00    8.76
  -5  14  15   12.64    5.49
  -5  14  16    0.19    6.80
  -5  14  17    0.01    6.84
  -5  14  18   11.18    4.94
  -5  14  19   30.45    9.48
  -5  14  20   18.21    7.99
  -5  15  -4   45.67    9.21
  -5  15  -3    4.25    2.23
  -5  15  -2  206.23   13.64
  -5  15  -1   32.81    5.05
  -5  15   0  198.33    8.63
  -5  15   1    2.35    1.91
  -5  15   2   41.45    3.55
  -5  15   3    0.19    1.91
  -5  15   4   52.02    7.71
  -5  15   5    0.00    2.17
  -5  15   6   22.19    4.85
  -5  15   7    7.27    4.01
  -5  15   8  129.06   13.35
  -5  15   9   26.59    6.08
  -5  15  10  365.40   20.78
  -5  15  11   71.27    9.80
  -5  15  12   45.11    9.38
  -5  15  13   80.19   12.30
  -5  15  14    4.87    5.31
  -5  15  15  146.53   15.93
  -5  15  16    3.99    5.17
  -5  15  17  137.78   16.65
  -5  15  18   13.17    5.43
  -5  15  19   73.50   11.55
  -5  16  -4  204.50   16.41
  -5  16  -3   18.59    4.08
  -5  16  -2  344.76   11.69
  -5  16  -1   15.18    3.11
  -5  16   0  723.33   18.35
  -5  16   1   52.51    5.82
  -5  16   2 1107.39   23.97
  -5  16   3    1.18    3.27
  -5  16   4  564.29   18.22
  -5  16   5    7.32    3.93
  -5  16   6  651.80   23.59
  -5  16   7   34.06    5.57
  -5  16   8  148.64   14.21
  -5  16   9   46.49    8.05
  -5  16  10   29.17    6.62
  -5  16  11   84.92   10.98
  -5  16  12  237.69   19.64
  -5  16  13   45.66    9.78
  -5  16  14  210.52   17.55
  -5  16  15   12.40    5.02
  -5  16  16   95.82   13.59
  -5  16  17    1.09    5.40
  -5  16  18   95.90   14.06
  -5  17  -4  579.47   16.86
  -5  17  -3   82.64    6.84
  -5  17  -2  357.38   22.22
  -5  17  -1  128.67   12.43
  -5  17   0   84.34    6.94
  -5  17   1    1.08    7.66
  -5  17   2   67.49    7.49
  -5  17   3   18.95    3.03
  -5  17   4  394.50   13.24
  -5  17   5   25.81    6.00
  -5  17   6  653.69   25.97
  -5  17   7   21.35    5.05
  -5  17   8  721.07   32.46
  -5  17   9   63.02    9.40
  -5  17  10  598.85   30.93
  -5  17  11   13.93    5.83
  -5  17  12  208.32   18.24
  -5  17  13    1.37    4.08
  -5  17  14   78.09   12.54
  -5  17  15   20.06    7.57
  -5  17  16    1.79    5.03
  -5  17  17   23.14    8.07
  -5  17  18    0.98    5.49
  -5  18  -4  235.36   11.01
  -5  18  -3  257.84   11.41
  -5  18  -2  241.41   14.47
  -5  18  -1  565.02   18.11
  -5  18   0  702.28   18.40
  -5  18   1  614.90   21.01
  -5  18   2 1076.38   49.23
  -5  18   3  626.04   39.66
  -5  18   4  849.25   22.07
  -5  18   5  350.52   25.88
  -5  18   6  394.59   19.75
  -5  18   7   18.98    4.50
  -5  18   8   31.92    5.01
  -5  18   9    5.73    4.24
  -5  18  10    4.96    4.81
  -5  18  11   73.39   11.98
  -5  18  12   59.59   10.76
  -5  18  13  131.54   15.17
  -5  18  14  233.83   20.62
  -5  18  15  131.38   15.38
  -5  18  16  205.14   19.59
  -5  18  17   56.22    9.84
  -5  19  -4  333.50   22.14
  -5  19  -3  383.86   24.43
  -5  19  -2  268.39   19.98
  -5  19  -1  164.00   17.42
  -5  19   0   81.23   11.25
  -5  19   1    0.92    2.95
  -5  19   2   19.92    5.55
  -5  19   3  113.19   10.05
  -5  19   4  250.05   15.53
  -5  19   5  412.31   43.62
  -5  19   6  295.20   17.10
  -5  19   7  516.31   21.71
  -5  19   8  266.67   20.56
  -5  19   9  588.50   32.67
  -5  19  10  194.81   17.98
  -5  19  11  419.07   25.01
  -5  19  12  120.18   14.68
  -5  19  13  166.07   18.36
  -5  19  14   14.68    7.70
  -5  19  15   21.67    7.39
  -5  20  -4    2.58    4.33
  -5  20  -3  269.36   19.77
  -5  20  -2    5.95    4.84
  -5  20  -1  689.48   34.23
  -5  20   0   99.85   14.61
  -5  20   1 1074.37   41.51
  -5  20   2  129.77   15.38
  -5  20   3  848.67   37.85
  -5  20   4   69.90   10.14
  -5  20   5  303.56   22.43
  -5  20   6    0.19    4.02
  -5  20   8    4.32    4.43
  -5  20   9   16.20    5.99
  -5  20  10   33.15    8.85
  -5  20  11   36.01    8.61
  -5  20  12   58.19   11.69
  -5  20  13  111.02   15.33
  -5  20  14   45.77   10.29
  -5  21  -4   18.71    7.34
  -5  21  -3  173.28   17.01
  -5  21  -2   28.37    6.72
  -5  21  -1  101.35   12.78
  -5  21   0    2.87    3.89
  -5  21   1    0.15    4.87
  -5  21   2    0.37    4.58
  -5  21   3   91.63   12.05
  -5  21   4   16.84    7.17
  -5  21   5  136.27   16.21
  -5  21   6    6.63    6.58
  -5  21   7  182.91   17.94
  -5  21   8    6.63    6.72
  -5  21   9  293.51   21.93
  -5  21  10   17.08    8.23
  -5  21  11  284.31   23.11
  -5  21  12   16.43    7.87
  -5  22  -4   76.50   11.04
  -5  22  -3   24.79    6.97
  -5  22  -2   87.18   11.43
  -5  22  -1  119.13   15.59
  -5  22   0   76.43   12.09
  -5  22   1  110.28   14.62
  -5  22   2   48.64   10.84
  -5  22   3   50.46    9.05
  -5  22   4    7.83    4.16
  -5  22   5   34.58    9.09
  -5  22   6   21.01    7.40
  -5  22   7   11.09    6.73
  -5  22   8   18.58    6.99
  -5  22   9   27.41    7.46
  -5  22  10   31.11    9.05
  -5  23  -4   15.18    6.59
  -5  23  -3    2.92    4.61
  -5  23  -2    4.84    5.37
  -5  23  -1    1.38    4.93
  -5  23   0   15.91    6.96
  -5  23   1    0.02    3.91
  -5  23   2   23.71    6.88
  -5  23   3    0.18    5.01
  -5  23   4    2.03    4.15
  -5  23   5    0.05    5.63
  -5  23   6   11.96    5.40
  -5  23   7    4.12    4.63
  -5  23   8    5.15    3.86
  -4   0  -2 4149.09   24.63
  -4   0   2   16.67    1.15
  -4   0   4  185.80    1.73
  -4   0   6 1321.82   33.00
  -4   0   8 3445.18  106.58
  -4   0  10 3089.43   37.39
  -4   0  12 1907.69   26.19
  -4   0  14 1216.21   22.46
  -4   0  16  164.92   12.52
  -4   0  18   94.90   13.00
  -4   0  20  244.52   17.60
  -4   0  22  140.26   16.35
  -4   0  24  203.96   20.09
  -4   1  -3  179.29    1.71
  -4   1  -1  611.35    6.59
  -4   1   0  165.07    1.52
  -4   1   2  995.44    9.09
  -4   1   3   21.20    0.70
  -4   1   5   88.79   12.38
  -4   1   6 1284.88   21.64
  -4   1   7  274.07    7.75
  -4   1   8  571.03    9.47
  -4   1   9   13.99    1.84
  -4   1  10   42.86    3.88
  -4   1  11   65.04    3.87
  -4   1  12  396.35    8.51
  -4   1  13    4.25    1.48
  -4   1  14  551.85   19.46
  -4   1  15   27.28    3.33
  -4   1  16  757.16   19.61
  -4   1  17  144.65    7.60
  -4   1  18  792.79   23.89
  -4   1  19   78.83    7.75
  -4   1  20  307.76   18.39
  -4   1  21   20.11    7.11
  -4   1  22   45.84    6.88
  -4   1  23   20.13    5.30
  -4   1  24   44.98    7.13
  -4   1  25    6.82    5.42
  -4   2  -3    0.44    0.96
  -4   2  -2 2718.96   33.01
  -4   2   1    8.85    1.78
  -4   2   2  375.72   10.66
  -4   2   3    2.35    0.86
  -4   2   4   23.87    2.86
  -4   2   5  754.65   15.46
  -4   2   6   53.03    3.85
  -4   2   7 1845.33   25.53
  -4   2   8  160.47   11.61
  -4   2   9  908.90   14.06
  -4   2  10  608.78    8.30
  -4   2  11  129.10    4.34
  -4   2  12  789.51   10.78
  -4   2  13   51.82    2.54
  -4   2  14  503.65    8.26
  -4   2  15   21.26    3.44
  -4   2  16   40.17    4.28
  -4   2  17    4.67    1.84
  -4   2  18    9.11    6.60
  -4   2  19   12.24    3.59
  -4   2  20   49.10   10.52
  -4   2  21   36.95   15.17
  -4   2  22   89.86    8.38
  -4   2  23   42.43    7.03
  -4   2  24  106.15   10.49
  -4   3  -2 1397.86   12.93
  -4   3  -1 1527.75   40.13
  -4   3   0   18.85    1.86
  -4   3   1 1401.93   25.40
  -4   3   2 1935.70   18.01
  -4   3   4 1011.04   15.22
  -4   3   5   60.85    6.54
  -4   3   6 1053.40   18.37
  -4   3   7   66.74    1.87
  -4   3   8  565.54   21.15
  -4   3   9    3.46    0.91
  -4   3  10    0.85    1.76
  -4   3  11  331.77    9.29
  -4   3  12   79.06    3.28
  -4   3  13  289.06    5.91
  -4   3  14   52.87    2.73
  -4   3  15  472.24    9.72
  -4   3  16   67.28    3.79
  -4   3  17  326.49    8.70
  -4   3  18   89.70    5.26
  -4   3  19   92.66    9.22
  -4   3  20   26.03    4.36
  -4   3  21   53.59    6.75
  -4   3  22    0.14    3.34
  -4   3  23   32.54    6.54
  -4   3  24    0.74    3.65
  -4   4  -3   38.21    4.04
  -4   4  -2 1543.96   16.83
  -4   4  -1   40.25    3.87
  -4   4   0  815.22   18.22
  -4   4   1   36.27    7.44
  -4   4   3  264.47    5.58
  -4   4   4  290.75   17.92
  -4   4   5  493.51   14.72
  -4   4   6  341.11   17.74
  -4   4   7  279.91    9.06
  -4   4   8    3.90    2.20
  -4   4   9  193.88    5.27
  -4   4  10   52.82    3.98
  -4   4  11  362.16    7.47
  -4   4  12    0.10    1.01
  -4   4  13  109.85    3.32
  -4   4  14    8.32    1.95
  -4   4  15    0.67    1.18
  -4   4  16    0.23    2.63
  -4   4  17    0.05    1.50
  -4   4  18   19.76    2.01
  -4   4  19    1.39    4.38
  -4   4  20    9.76    7.83
  -4   4  21    0.39    4.34
  -4   4  22    0.03    6.18
  -4   4  23    9.54    5.52
  -4   4  24    0.62    7.16
  -4   5  -3   49.06    3.94
  -4   5  -2 1707.45   55.50
  -4   5  -1  377.71   13.43
  -4   5   0  422.70    8.56
  -4   5   1   57.40    2.63
  -4   5   2  162.18    4.77
  -4   5   3   87.77    3.44
  -4   5   4   72.49    4.60
  -4   5   5  647.05   11.60
  -4   5   6  476.44   11.07
  -4   5   7  181.92   10.32
  -4   5   8 1379.02   39.94
  -4   5   9   14.24    3.59
  -4   5  10   13.77    2.84
  -4   5  11    2.34    1.87
  -4   5  12   18.02    3.03
  -4   5  13    7.90    1.88
  -4   5  14   38.49    3.20
  -4   5  15    0.27    1.63
  -4   5  16    2.50    1.76
  -4   5  17    0.05    6.51
  -4   5  18    0.77    7.20
  -4   5  19    6.56    4.15
  -4   5  20   10.66    4.85
  -4   5  21    4.25    4.87
  -4   5  22   12.67    5.94
  -4   5  23    0.41    5.43
  -4   5  24   17.77    4.64
  -4   6  -3  136.19    6.19
  -4   6  -2 3100.67   40.47
  -4   6  -1   66.33    5.06
  -4   6   0 1734.75   19.07
  -4   6   1    0.82    0.93
  -4   6   3  188.22   10.60
  -4   6   4  997.50   15.59
  -4   6   5  330.43    8.76
  -4   6   6  770.87   15.38
  -4   6   7  143.25    6.20
  -4   6   8   91.32    7.42
  -4   6   9  441.96   14.29
  -4   6  10   36.74    8.02
  -4   6  11  516.64   13.06
  -4   6  12   24.44    2.61
  -4   6  13  310.51    9.20
  -4   6  14   31.32    3.64
  -4   6  15   84.69    5.69
  -4   6  16   11.80    5.61
  -4   6  17   30.36    3.31
  -4   6  18   15.79    5.63
  -4   6  19    2.06    6.92
  -4   6  20   30.55    8.14
  -4   6  21   29.29    6.73
  -4   6  22   10.27    4.77
  -4   6  23   36.76    9.41
  -4   6  24    3.93    4.72
  -4   7  -3   55.81    5.25
  -4   7  -2  346.50   13.56
  -4   7  -1 1553.09   28.26
  -4   7   0  198.67    8.81
  -4   7   1 3506.49   45.22
  -4   7   2  809.84   13.37
  -4   7   3 2651.24   50.30
  -4   7   4  511.99   14.90
  -4   7   5 1281.83   27.96
  -4   7   6  293.81   10.83
  -4   7   7  626.78   13.59
  -4   7   8 1529.34   24.97
  -4   7   9    7.65    2.32
  -4   7  10  126.38   12.68
  -4   7  11   56.67    7.83
  -4   7  12   20.21    6.82
  -4   7  13  349.13   10.85
  -4   7  14  149.91   17.64
  -4   7  15  509.99   30.94
  -4   7  16  102.79    5.85
  -4   7  17  473.15   26.00
  -4   7  18  120.30   13.14
  -4   7  19  208.90   17.88
  -4   7  20   26.05    7.81
  -4   7  21   92.66   13.39
  -4   7  22    2.53    4.61
  -4   7  23   25.54    7.68
  -4   7  24   16.20    7.94
  -4   8  -3  139.01   10.62
  -4   8  -2  761.36   25.32
  -4   8  -1   70.76    4.88
  -4   8   0  396.76    9.66
  -4   8   1   39.02    3.24
  -4   8   2   33.31    1.77
  -4   8   3    7.98    1.44
  -4   8   4    0.00    1.14
  -4   8   5  429.55   11.42
  -4   8   6   82.67    6.77
  -4   8   7  769.18   15.25
  -4   8   8  422.74   11.42
  -4   8   9 1153.16   21.60
  -4   8  10 1037.20   34.89
  -4   8  11  860.88   30.24
  -4   8  12  625.90   25.62
  -4   8  13  487.39   12.92
  -4   8  14  291.08   10.49
  -4   8  15  105.19    6.10
  -4   8  16  135.44   13.00
  -4   8  17   12.41    4.68
  -4   8  18    6.20    7.79
  -4   8  19    6.94    4.72
  -4   8  20   32.18    8.80
  -4   8  21   83.78   12.73
  -4   8  22   69.89   12.44
  -4   8  23   85.75   12.89
  -4   9  -3  240.43   12.27
  -4   9  -2  350.34   13.27
  -4   9  -1  856.01   26.84
  -4   9   0  900.73   18.27
  -4   9   1  184.44    6.70
  -4   9   2 1690.02   26.49
  -4   9   3  388.33   12.59
  -4   9   4 2077.53   32.36
  -4   9   5  771.91   19.57
  -4   9   6 1095.49   20.25
  -4   9   7  226.14    8.72
  -4   9   8  698.91   18.24
  -4   9   9    5.56    3.66
  -4   9  10    3.80    3.41
  -4   9  11   51.00    9.62
  -4   9  12   60.87    9.62
  -4   9  13   96.65   11.29
  -4   9  14  417.96   22.89
  -4   9  15  161.52   14.93
  -4   9  16  599.52   29.57
  -4   9  17  154.30   14.74
  -4   9  18  621.74   30.77
  -4   9  19   73.23   12.38
  -4   9  20  173.13   18.40
  -4   9  21   57.53   10.04
  -4   9  22   62.20   11.26
  -4   9  23   24.96    8.59
  -4  10  -3   48.86    4.51
  -4  10  -2  933.04   29.95
  -4  10  -1   19.07    4.40
  -4  10   0   77.44    4.31
  -4  10   1   93.49   13.29
  -4  10   2   44.57    6.17
  -4  10   3   73.48    6.51
  -4  10   4   39.04    2.97
  -4  10   5    7.84    1.99
  -4  10   6 1233.43   29.45
  -4  10   7    8.27   13.48
  -4  10   8 1756.20   29.23
  -4  10   9    8.84    6.85
  -4  10  10 1591.81   41.12
  -4  10  11   25.38    6.29
  -4  10  12 1135.23   35.65
  -4  10  13   44.09    7.11
  -4  10  14  574.30   27.59
  -4  10  15   10.25    6.80
  -4  10  16   92.14   11.61
  -4  10  17    1.27    4.71
  -4  10  18   39.97    8.85
  -4  10  19    2.24    4.53
  -4  10  20  159.22   15.47
  -4  10  21   13.68    7.23
  -4  10  22  128.99   16.13
  -4  11  -3  427.47   16.44
  -4  11  -2  182.99   15.20
  -4  11  -1  502.56   12.44
  -4  11   0  610.16   14.08
  -4  11   1   26.74    2.61
  -4  11   2  862.83   20.67
  -4  11   3   38.43    4.18
  -4  11   4 1022.73   23.56
  -4  11   5   25.51    4.83
  -4  11   6 1135.21   23.02
  -4  11   7    0.10    2.69
  -4  11   8  441.95   20.97
  -4  11   9   22.93    8.00
  -4  11  10    2.05    3.59
  -4  11  11   21.96    4.65
  -4  11  12  134.62   12.27
  -4  11  13    2.21    4.48
  -4  11  14  352.95   22.21
  -4  11  15   10.92    5.27
  -4  11  16  406.02   23.10
  -4  11  17   30.69    9.41
  -4  11  18  321.97   23.11
  -4  11  19   10.82    6.09
  -4  11  20  171.53   17.44
  -4  11  21   25.33    7.34
  -4  11  22   62.83   12.70
  -4  12  -3   24.51    4.25
  -4  12  -2  800.90   28.20
  -4  12  -1   93.29    5.64
  -4  12   0  636.80   15.53
  -4  12   1  589.42   14.06
  -4  12   2   70.52    5.63
  -4  12   3  678.24   19.95
  -4  12   4   38.15    4.89
  -4  12   5  353.55   18.33
  -4  12   6   18.27    3.60
  -4  12   7  438.35   20.45
  -4  12   8   60.23    9.84
  -4  12   9  342.83   18.71
  -4  12  10  306.76   16.94
  -4  12  11   31.57    6.26
  -4  12  12  404.49   22.26
  -4  12  13    2.29    5.66
  -4  12  14  164.65   14.20
  -4  12  15    0.01    4.00
  -4  12  16   16.61    3.53
  -4  12  17    0.15    5.34
  -4  12  18    0.02    4.48
  -4  12  19    0.15    4.67
  -4  12  20   36.65    8.92
  -4  12  21    0.32    4.12
  -4  13  -3  497.00   26.22
  -4  13  -2  331.55   10.82
  -4  13  -1  862.11   16.98
  -4  13   0    9.71    3.64
  -4  13   1  269.50    9.22
  -4  13   2  256.16   21.51
  -4  13   3   42.05    5.29
  -4  13   4  193.25   11.63
  -4  13   5   22.88    2.52
  -4  13   6  120.35    8.36
  -4  13   7    2.05    2.85
  -4  13   8   38.97    6.33
  -4  13   9    1.50    3.75
  -4  13  10    0.11    3.10
  -4  13  11  148.44   13.41
  -4  13  12    2.09    3.73
  -4  13  13  151.07   14.23
  -4  13  14   33.76    6.57
  -4  13  15   60.20    9.75
  -4  13  16   15.53    6.22
  -4  13  17   45.69    8.68
  -4  13  18   18.04    6.57
  -4  13  19   39.25    8.81
  -4  13  20    0.20    4.41
  -4  13  21    4.15    5.26
  -4  14  -3   63.05    8.52
  -4  14  -2  238.18   10.30
  -4  14  -1  184.42    9.66
  -4  14   0  254.99    8.40
  -4  14   1  222.48    8.31
  -4  14   2  274.42   11.57
  -4  14   3  160.61   11.48
  -4  14   4  175.11   10.32
  -4  14   5   38.31    5.17
  -4  14   6  210.20   13.47
  -4  14   7    2.21    2.52
  -4  14   8   80.35    8.71
  -4  14   9    0.14    4.22
  -4  14  10   13.18    5.83
  -4  14  11    0.10    4.05
  -4  14  12    2.14    5.07
  -4  14  13    4.84    3.80
  -4  14  14    4.23    4.47
  -4  14  15   17.80    4.65
  -4  14  16    0.00    5.23
  -4  14  17    1.03    4.47
  -4  14  18    0.11    5.43
  -4  14  19    0.07    7.08
  -4  14  20    4.97    4.08
  -4  15  -3   10.91    4.12
  -4  15  -2  458.33   13.77
  -4  15  -1   13.09    2.60
  -4  15   0  294.31   11.79
  -4  15   1  190.77   12.86
  -4  15   2  219.82   10.11
  -4  15   3   17.99    5.00
  -4  15   4   20.06    4.36
  -4  15   5  152.17   11.24
  -4  15   6  216.68   12.76
  -4  15   7  166.26   10.96
  -4  15   8  130.21    9.34
  -4  15   9   10.33    4.26
  -4  15  10   80.53    9.56
  -4  15  11   13.84    5.48
  -4  15  12   70.92   11.34
  -4  15  13   35.30    8.05
  -4  15  14    4.18    4.53
  -4  15  15   19.53    7.28
  -4  15  16    1.04    4.57
  -4  15  17   17.89    5.53
  -4  15  18    1.21    5.47
  -4  15  19   34.02    9.22
  -4  16  -3  177.15    9.15
  -4  16  -2  234.99   10.42
  -4  16  -1  190.94    9.13
  -4  16   0  345.48   12.30
  -4  16   1   18.03    4.17
  -4  16   2  437.27   14.18
  -4  16   3   26.36    4.51
  -4  16   4  408.90   18.03
  -4  16   5   31.50    4.49
  -4  16   6  346.49   17.83
  -4  16   7   77.47    7.54
  -4  16   8    8.14    4.80
  -4  16   9  523.80   26.61
  -4  16  10    4.76    5.50
  -4  16  11  583.11   27.13
  -4  16  12    9.26    5.55
  -4  16  13  254.55   19.72
  -4  16  14    6.16    5.89
  -4  16  15   44.53    9.61
  -4  16  16    3.39    5.13
  -4  16  17    2.29    4.92
  -4  16  18    0.05    6.44
  -4  16  19    0.06    5.27
  -4  17  -3   72.46    5.18
  -4  17  -2    3.62    3.68
  -4  17  -1  452.44   15.31
  -4  17   0   84.89    7.67
  -4  17   1  957.94   21.87
  -4  17   2  127.68    7.98
  -4  17   3  802.37   22.30
  -4  17   4  308.00   19.68
  -4  17   5 1137.20   32.21
  -4  17   6  159.41   12.85
  -4  17   7  451.82   22.77
  -4  17   8  118.00    7.73
  -4  17   9   18.44    4.76
  -4  17  10   52.91    9.67
  -4  17  11   24.54    6.75
  -4  17  12   18.38    6.71
  -4  17  13  204.30   19.90
  -4  17  14   59.60   11.00
  -4  17  15  303.02   22.85
  -4  17  16   36.22    9.62
  -4  17  17  290.42   24.13
  -4  17  18   10.68    5.18
  -4  18  -3  392.77   14.57
  -4  18  -2  373.16   13.85
  -4  18  -1  201.04   12.15
  -4  18   0  152.37    9.34
  -4  18   1    6.29    2.49
  -4  18   2    5.87    3.11
  -4  18   3   58.52    5.23
  -4  18   4   29.14    4.05
  -4  18   5  262.42   16.34
  -4  18   6   68.37    9.72
  -4  18   7  552.00   24.38
  -4  18   8  276.19   16.72
  -4  18   9  656.42   30.94
  -4  18  10  296.53   21.78
  -4  18  11  516.97   28.97
  -4  18  12  305.33   22.30
  -4  18  13  468.31   27.33
  -4  18  14  156.76   17.34
  -4  18  15  138.65   15.46
  -4  18  16   39.51    9.57
  -4  18  17   15.03    7.62
  -4  19  -3    0.04    2.53
  -4  19  -2  201.94   10.35
  -4  19  -1   74.05    9.21
  -4  19   0  287.66   28.06
  -4  19   1  196.12   10.55
  -4  19   2  477.76   26.34
  -4  19   3  482.27   31.56
  -4  19   4  718.33   50.47
  -4  19   5  497.40   17.73
  -4  19   6  258.95   17.21
  -4  19   7  125.42   12.23
  -4  19   8   49.66    7.57
  -4  19   9    9.02    3.63
  -4  19  10    3.86    6.12
  -4  19  11    0.82    5.17
  -4  19  12   33.09    8.78
  -4  19  13   68.78   11.21
  -4  19  14  160.20   18.27
  -4  19  15   56.20   11.93
  -4  19  16  242.68   22.47
  -4  20  -3   68.93    6.76
  -4  20  -2  194.92   10.62
  -4  20  -1  167.38   10.47
  -4  20   0   88.69   14.08
  -4  20   1  242.18   13.92
  -4  20   2    0.73    2.76
  -4  20   3  102.62    6.99
  -4  20   4   93.48    9.44
  -4  20   5   12.90    8.21
  -4  20   6  300.09   19.47
  -4  20   7   13.01    4.91
  -4  20   8  493.83   24.74
  -4  20   9   43.92    6.84
  -4  20  10  591.36   31.74
  -4  20  11   58.14   11.17
  -4  20  12  452.10   27.94
  -4  20  13   31.17    8.72
  -4  20  14  163.37   17.90
  -4  21  -3  468.42   28.35
  -4  21  -2  189.14   17.36
  -4  21  -1  186.00   17.88
  -4  21   0  256.09   20.26
  -4  21   1   63.83   11.19
  -4  21   2  302.44   20.53
  -4  21   3    2.34    2.44
  -4  21   4  230.93   13.01
  -4  21   5   25.49    4.95
  -4  21   6  165.19   10.28
  -4  21   7   51.53    7.28
  -4  21   8   63.20    9.25
  -4  21   9   44.72    6.36
  -4  21  10    0.85    4.20
  -4  21  11   21.20    9.12
  -4  21  12   50.14   10.60
  -4  21  13    0.10    4.37
  -4  22  -3   14.71    7.11
  -4  22  -2  115.45   13.23
  -4  22  -1   98.24   12.22
  -4  22   0   62.07   11.48
  -4  22   1  254.96   21.00
  -4  22   2   14.18    4.95
  -4  22   3  182.18   18.79
  -4  22   4    0.20    5.18
  -4  22   5  121.24   14.48
  -4  22   6    8.87    4.59
  -4  22   7   94.77   14.02
  -4  22   9   75.99   12.86
  -4  22  10   67.99   13.09
  -4  22  11    1.34    4.56
  -4  23  -3  281.20   22.84
  -4  23  -2   43.68    9.33
  -4  23  -1  206.59   19.50
  -4  23   0   21.15    7.11
  -4  23   1   45.07    9.52
  -4  23   2    2.89    4.21
  -4  23   3    0.96    4.69
  -4  23   4    0.81    6.00
  -4  23   5    4.32    4.40
  -4  23   6   26.38    8.37
  -4  23   7   15.31    6.49
  -4  23   8   10.27    7.06
  -4  24  -2   36.58    8.84
  -4  24  -1   47.99   10.55
  -4  24   0   55.49    9.49
  -4  24   1  128.27   16.26
  -4  24   2  122.17   15.61
  -4  24   3   61.14   11.09
  -4  24   4   94.51   13.91
  -4  24   5    1.30    5.44
  -3   0  -1  887.19    7.69
  -3   0   5   58.29    4.60
  -3   0   7  651.49   19.98
  -3   0   9 1037.06   25.79
  -3   0  11  187.95    6.29
  -3   0  13   17.23    1.56
  -3   0  15   86.82    6.50
  -3   0  17  436.91   22.10
  -3   0  19  639.22   31.07
  -3   0  21  255.41   19.82
  -3   0  23  240.61   21.04
  -3   0  25   24.22    7.38
  -3   1  -1  328.52    6.78
  -3   1   3   29.07    6.53
  -3   1   4 2184.29   27.94
  -3   1   5   17.25    1.75
  -3   1   6  510.02   11.36
  -3   1   8 1008.53   13.42
  -3   1   9  589.54    7.79
  -3   1  10  413.25    7.02
  -3   1  11 1529.47   33.62
  -3   1  12   35.37    4.53
  -3   1  13  830.21   11.80
  -3   1  14    2.12    1.50
  -3   1  15  372.77    9.14
  -3   1  16    0.20    1.49
  -3   1  17   15.38    3.85
  -3   1  18   12.44    3.90
  -3   1  19    3.02    3.65
  -3   1  20   31.98    6.17
  -3   1  21   92.48    9.10
  -3   1  22   38.82    5.92
  -3   1  23  137.41   11.14
  -3   1  24   35.66    6.46
  -3   1  25  147.03   12.72
  -3   2  -2 1647.57   29.69
  -3   2  -1  928.30   13.49
  -3   2   0 3456.93   68.29
  -3   2   1  221.83    5.92
  -3   2   2 1382.46   15.39
  -3   2   3 1661.12   20.01
  -3   2   4   13.56    2.33
  -3   2   5 2062.31   28.55
  -3   2   6    0.15    5.48
  -3   2   7 1229.05   29.46
  -3   2   8   60.32    3.27
  -3   2   9  237.39    5.35
  -3   2  10   83.76    2.80
  -3   2  11  148.31    5.10
  -3   2  12  381.39    6.94
  -3   2  13    4.47    1.43
  -3   2  14  340.63    7.84
  -3   2  15   49.24    2.56
  -3   2  16  404.22   11.59
  -3   2  17  224.94   12.21
  -3   2  18  125.91   29.00
  -3   2  19  272.17   14.41
  -3   2  20   68.11    7.36
  -3   2  21  137.82   10.67
  -3   2  22   20.71    4.94
  -3   2  23  137.56   12.74
  -3   2  24    5.75    3.82
  -3   3  -2 1544.62   23.24
  -3   3   0 1714.65   15.38
  -3   3   1  753.41   13.75
  -3   3   2  389.37    7.85
  -3   3   3  477.15   14.34
  -3   3   4 1967.86   32.26
  -3   3   5 3362.21   28.47
  -3   3   6  421.40   11.71
  -3   3   7 1264.85   14.49
  -3   3   8  574.90   10.13
  -3   3   9   19.62    3.10
  -3   3  10  104.27    7.61
  -3   3  11  297.39    5.84
  -3   3  12  189.27    6.13
  -3   3  13  346.81    7.93
  -3   3  14    7.26    1.44
  -3   3  15  245.47    6.61
  -3   3  16    6.35    1.46
  -3   3  17   63.86    6.14
  -3   3  18   14.70    3.65
  -3   3  19    9.93    3.17
  -3   3  20   11.89    3.37
  -3   3  21    2.03    9.02
  -3   3  22   59.55    7.97
  -3   3  23    0.71    4.36
  -3   3  24   61.33    7.53
  -3   4  -2  217.88    5.85
  -3   4  -1 3270.14   72.15
  -3   4   0   92.32    4.10
  -3   4   2  122.63    5.72
  -3   4   3  584.64   14.64
  -3   4   4    4.50    1.65
  -3   4   6   66.57    2.70
  -3   4   7 2259.92   40.85
  -3   4   8   56.34    6.42
  -3   4   9 1507.92   28.32
  -3   4  10  115.26    2.87
  -3   4  11  766.93   10.68
  -3   4  12  200.35    6.28
  -3   4  13  693.03   12.30
  -3   4  14  123.25    3.87
  -3   4  15  365.06   11.91
  -3   4  16  167.63    7.14
  -3   4  17    6.69    2.91
  -3   4  18   49.87    4.74
  -3   4  19    0.12    4.10
  -3   4  20   28.48    4.75
  -3   4  21    0.05    5.42
  -3   4  22    0.48    4.35
  -3   4  23   19.97    4.65
  -3   4  24    0.83    5.05
  -3   5  -2   46.65    4.15
  -3   5  -1 2657.06   44.59
  -3   5   1 4475.51   72.35
  -3   5   2  105.02    3.74
  -3   5   3 2053.56   23.25
  -3   5   4  748.15   23.12
  -3   5   5 7126.03  106.74
  -3   5   6   16.60    2.39
  -3   5   7 4976.07   70.53
  -3   5   8   52.83    6.31
  -3   5   9  299.51   14.75
  -3   5  10    0.05    1.39
  -3   5  11   53.28    3.37
  -3   5  12    8.88    1.24
  -3   5  13    9.49    1.71
  -3   5  14   35.07    3.15
  -3   5  15  155.52    7.02
  -3   5  16    9.76    3.70
  -3   5  17  235.91   17.24
  -3   5  18   12.42    4.44
  -3   5  19   65.60    9.15
  -3   5  20    0.00    5.66
  -3   5  21   36.18    7.51
  -3   5  22    0.13    6.24
  -3   5  23    2.48    4.73
  -3   5  24    2.00    5.83
  -3   6  -2  586.70   20.66
  -3   6  -1 2061.54   43.91
  -3   6   0  326.21    9.46
  -3   6   1  698.92   13.94
  -3   6   2   51.11    3.51
  -3   6   3  225.78    7.48
  -3   6   4  128.53    4.26
  -3   6   5   33.12    2.65
  -3   6   6   39.69    3.15
  -3   6   7  795.51   30.55
  -3   6   8  126.89   15.94
  -3   6   9 1067.64   18.98
  -3   6  10  180.04   11.98
  -3   6  11 1104.26   16.06
  -3   6  12   26.15    2.90
  -3   6  13  517.94   12.16
  -3   6  14  115.36    5.90
  -3   6  15  255.76   13.38
  -3   6  16  159.49   14.88
  -3   6  17   25.64    5.67
  -3   6  18  178.57   16.20
  -3   6  19    0.44    2.03
  -3   6  20   48.15    9.12
  -3   6  21   28.36    8.79
  -3   6  22   26.95    8.07
  -3   6  23    6.54    4.90
  -3   6  24    0.42    5.13
  -3   7  -2  365.07   10.53
  -3   7  -1  490.26   15.54
  -3   7   0  444.63   10.00
  -3   7   1 2011.16   33.71
  -3   7   2  126.54    3.69
  -3   7   3 1553.68   23.97
  -3   7   4  226.80    7.41
  -3   7   5 1823.59   25.92
  -3   7   6  185.08    9.18
  -3   7   7 1228.32   18.33
  -3   7   8  529.27   14.70
  -3   7   9    0.25    2.45
  -3   7  10  845.95   25.81
  -3   7  11   10.91    3.31
  -3   7  12  420.84   11.35
  -3   7  13  223.50    8.66
  -3   7  14  185.73    7.67
  -3   7  15  243.97   16.77
  -3   7  16   46.48    9.35
  -3   7  17  214.10   15.90
  -3   7  18    1.44    3.65
  -3   7  19   17.30    6.25
  -3   7  20    9.27    4.37
  -3   7  21   10.33    4.63
  -3   7  22   53.98   10.44
  -3   7  23    2.91    6.09
  -3   7  24   47.45   10.55
  -3   8  -2  491.08   22.57
  -3   8  -1  190.93   12.27
  -3   8   0 1140.78   17.63
  -3   8   1   51.86    7.27
  -3   8   2  468.29   11.37
  -3   8   3  386.08    8.76
  -3   8   4  150.65    6.33
  -3   8   5  453.71    8.79
  -3   8   6   13.20    4.08
  -3   8   7  339.98   11.34
  -3   8   8   16.07   11.51
  -3   8   9  221.32   13.32
  -3   8  10   42.42    5.85
  -3   8  11   91.71    9.19
  -3   8  12  127.94    9.17
  -3   8  13    1.73    3.75
  -3   8  14  317.78   20.12
  -3   8  15   38.90    6.60
  -3   8  16  370.65   20.60
  -3   8  17  272.08   20.23
  -3   8  18  218.99    9.82
  -3   8  19  173.68   16.18
  -3   8  20  124.22   14.03
  -3   8  21  105.95   13.70
  -3   8  22   82.38   12.56
  -3   8  23   46.62    9.31
  -3   9  -2   54.60    4.66
  -3   9  -1    6.66    3.47
  -3   9   1   77.77    6.85
  -3   9   2  219.50    6.35
  -3   9   3  331.33   10.69
  -3   9   4   21.23    3.80
  -3   9   5   95.77   10.21
  -3   9   6   20.70    3.02
  -3   9   7   35.57    5.21
  -3   9   8   79.79    6.63
  -3   9   9 1003.19   29.42
  -3   9  10  172.37   12.51
  -3   9  11  719.26   29.33
  -3   9  12  391.19   20.80
  -3   9  13  669.34   25.17
  -3   9  14  168.64   13.47
  -3   9  15  317.00   20.87
  -3   9  16   23.44    8.25
  -3   9  17   84.66   11.77
  -3   9  18    3.94    2.73
  -3   9  19   10.78    7.53
  -3   9  20    4.14    3.91
  -3   9  21   35.27    8.75
  -3   9  22   49.42    9.46
  -3   9  23   85.98   13.61
  -3  10  -2  125.29   10.58
  -3  10  -1   24.80    6.68
  -3  10   0   41.38    4.63
  -3  10   1  137.46    5.78
  -3  10   2   12.42    2.93
  -3  10   3  159.35   10.57
  -3  10   4  166.55   11.30
  -3  10   5  526.75   12.92
  -3  10   6   95.18    8.21
  -3  10   7  532.65   11.36
  -3  10   8   35.27    4.47
  -3  10   9  172.25   11.96
  -3  10  10  144.17   13.73
  -3  10  11   14.61    6.27
  -3  10  12   48.88    5.68
  -3  10  13  142.40   11.72
  -3  10  14    4.91    5.61
  -3  10  15  225.72   17.71
  -3  10  16    2.27    3.33
  -3  10  17  349.36   12.09
  -3  10  18    8.31    2.89
  -3  10  19  346.86   22.80
  -3  10  20   27.87    8.06
  -3  10  21  193.04   18.09
  -3  10  22    6.55    5.43
  -3  11  -2   39.74    5.29
  -3  11  -1  117.84    5.53
  -3  11   0  230.28    7.00
  -3  11   1   78.12    4.46
  -3  11   2 1191.26   28.48
  -3  11   3   77.98    8.17
  -3  11   4  793.99   22.96
  -3  11   5   15.77    3.20
  -3  11   6  527.31   13.06
  -3  11   7   62.07    5.36
  -3  11   8  196.08   11.85
  -3  11   9  347.17   20.50
  -3  11  10   65.48    9.86
  -3  11  11  815.85   29.48
  -3  11  12    5.68    4.27
  -3  11  13  700.72   30.12
  -3  11  14   51.85    9.43
  -3  11  15  237.72   10.37
  -3  11  16  114.11   10.57
  -3  11  17   20.08    7.82
  -3  11  18   47.28    8.85
  -3  11  19    5.88    4.57
  -3  11  20   17.07    7.08
  -3  11  21   29.08    7.64
  -3  11  22    4.57    5.01
  -3  12  -2 1131.67   33.64
  -3  12  -1  235.76    9.60
  -3  12   0  827.38   18.04
  -3  12   1   32.54    5.42
  -3  12   2  398.91   13.39
  -3  12   3  140.90    9.15
  -3  12   4    2.91    2.25
  -3  12   5  213.12    8.00
  -3  12   6  136.43    9.56
  -3  12   7  438.51   17.77
  -3  12   8   38.22    3.38
  -3  12   9  170.78   15.33
  -3  12  10  226.73   15.59
  -3  12  11   67.95    8.39
  -3  12  12  417.72   21.83
  -3  12  13    8.37    5.23
  -3  12  14  321.16   20.03
  -3  12  15   19.26    5.03
  -3  12  16  154.62    8.72
  -3  12  17   64.15    6.14
  -3  12  18   36.83    8.07
  -3  12  19   79.33   11.77
  -3  12  20    2.21    4.84
  -3  12  21   31.51    6.79
  -3  13  -2  126.16    8.48
  -3  13  -1  725.11   16.83
  -3  13   0  259.36   14.34
  -3  13   1  696.38   16.27
  -3  13   2  720.34   19.12
  -3  13   3  655.90   20.63
  -3  13   4  939.86   28.76
  -3  13   5  702.15   23.20
  -3  13   6  514.38   21.52
  -3  13   7  506.52   20.17
  -3  13   8  187.05    8.76
  -3  13   9  104.88    9.98
  -3  13  10    1.44    4.57
  -3  13  11   36.56    6.03
  -3  13  12    6.61    4.10
  -3  13  13  184.64   15.21
  -3  13  14   12.93    4.10
  -3  13  15  142.92   13.76
  -3  13  16   25.03    8.08
  -3  13  17   77.90   12.46
  -3  13  18   25.19    7.90
  -3  13  19   24.24    6.79
  -3  13  20   39.20    7.04
  -3  13  21    2.28    4.39
  -3  14  -2  567.06   22.56
  -3  14  -1 1009.36   20.57
  -3  14   0  385.67   12.75
  -3  14   1  216.85   10.39
  -3  14   2  144.35    8.39
  -3  14   3   14.37    3.89
  -3  14   4    1.28    2.66
  -3  14   5   40.31    7.48
  -3  14   6   82.17    8.22
  -3  14   7  179.10   10.93
  -3  14   8   67.85    9.21
  -3  14   9  166.50   17.03
  -3  14  10  297.99   18.17
  -3  14  11  314.35   19.84
  -3  14  12  341.72   21.33
  -3  14  13  219.16   17.73
  -3  14  14   87.50   12.11
  -3  14  15  152.37   14.11
  -3  14  16   51.54    9.23
  -3  14  17   29.97    8.46
  -3  14  18   16.32    5.99
  -3  14  19    2.71    4.50
  -3  14  20    0.19    6.50
  -3  15  -2   84.99    6.56
  -3  15  -1  373.49   13.82
  -3  15   0  153.30    6.84
  -3  15   1  738.65   17.57
  -3  15   2  140.04    8.44
  -3  15   3  929.68   27.45
  -3  15   4   85.93    8.83
  -3  15   5 1421.96   34.79
  -3  15   6   25.41    5.23
  -3  15   7  850.99   31.27
  -3  15   8    6.01    4.46
  -3  15   9  222.67   11.84
  -3  15  10   63.02   10.17
  -3  15  11    1.44    3.96
  -3  15  12   55.88    8.91
  -3  15  13   50.09    8.33
  -3  15  14   92.31   12.62
  -3  15  15   43.31    8.28
  -3  15  16   30.70    8.22
  -3  15  17  114.91   14.38
  -3  15  18   25.08    7.55
  -3  15  19   87.19   12.38
  -3  15  20    0.96    4.75
  -3  16  -2   60.41    4.99
  -3  16  -1  347.54   11.85
  -3  16   0  203.03   10.10
  -3  16   1  273.81   12.00
  -3  16   2   93.02   10.16
  -3  16   3   20.06    3.31
  -3  16   4  128.02    9.81
  -3  16   5   43.91    5.83
  -3  16   6  192.42   12.98
  -3  16   7  247.31   16.74
  -3  16   8   24.61    6.96
  -3  16   9  503.68   16.79
  -3  16  10   11.24    6.65
  -3  16  11  367.07   20.85
  -3  16  12    1.26    4.87
  -3  16  13  142.33   14.82
  -3  16  14   60.85    9.46
  -3  16  15   91.26   12.96
  -3  16  16  142.22   14.70
  -3  16  17   28.24    8.34
  -3  16  18  184.73   18.76
  -3  16  19    3.40    7.65
  -3  17  -2    5.50    2.57
  -3  17  -1   22.06    5.84
  -3  17   0   31.84    4.37
  -3  17   1  221.32    9.86
  -3  17   2   72.14    6.41
  -3  17   3  488.66   16.96
  -3  17   4   16.62    4.98
  -3  17   5  618.94   24.89
  -3  17   6  115.48   10.31
  -3  17   7   83.78    9.55
  -3  17   8  234.79   16.48
  -3  17   9    9.63    4.95
  -3  17  10  295.44   21.00
  -3  17  11   27.50    7.05
  -3  17  12  266.14   20.27
  -3  17  13   96.06   12.43
  -3  17  14  210.20   17.84
  -3  17  15   72.52   11.03
  -3  17  16   74.85   11.94
  -3  17  17   96.29   13.98
  -3  17  18    3.55    6.11
  -3  18  -2    2.54    2.58
  -3  18  -1    3.82    2.38
  -3  18   0    1.87    2.43
  -3  18   1    1.30    3.38
  -3  18   2   49.98    3.57
  -3  18   3   61.78   11.44
  -3  18   4  214.11   21.66
  -3  18   5  208.96   14.74
  -3  18   6  236.88   15.04
  -3  18   7  105.76   10.55
  -3  18   8   29.26    6.93
  -3  18   9   84.34    8.56
  -3  18  10    2.27    4.75
  -3  18  11   25.23    7.41
  -3  18  12   13.04    4.98
  -3  18  13    2.08    4.76
  -3  18  14   29.99    7.81
  -3  18  15   37.60    9.89
  -3  18  16   81.74   13.32
  -3  18  17   60.43   10.97
  -3  19  -2   29.43    4.26
  -3  19  -1    0.15    3.25
  -3  19   0    8.65    3.06
  -3  19   1    3.86    2.77
  -3  19   2   83.73    7.84
  -3  19   3   10.33    4.25
  -3  19   4   58.72    5.47
  -3  19   5   47.13    4.95
  -3  19   6    6.48    4.01
  -3  19   7  194.41   14.61
  -3  19   8   71.56    8.80
  -3  19   9  257.62   14.46
  -3  19  10  100.29    8.97
  -3  19  11  380.27   24.86
  -3  19  12  168.70   17.43
  -3  19  13  371.88   24.80
  -3  19  14   66.16   12.26
  -3  19  15  126.89   16.18
  -3  19  16   21.35    6.37
  -3  20  -2  175.79   11.89
  -3  20  -1   30.80    3.94
  -3  20   0  137.10    8.39
  -3  20   1   30.05    4.88
  -3  20   2   21.47    3.88
  -3  20   3  177.42   11.50
  -3  20   4   32.63    4.78
  -3  20   5  189.52   11.37
  -3  20   6  115.16   12.01
  -3  20   7   31.20    6.51
  -3  20   8  158.23   14.94
  -3  20   9   12.40    3.60
  -3  20  10  170.14   14.38
  -3  20  11    0.61    5.16
  -3  20  12   36.65    9.21
  -3  20  13   35.34    8.94
  -3  20  14   15.93    6.97
  -3  21  -2  126.62   10.39
  -3  21  -1    1.83    2.61
  -3  21   0  280.54   13.11
  -3  21   1   28.81    4.82
  -3  21   2  480.45   34.24
  -3  21   3    9.11    4.84
  -3  21   4  525.25   51.53
  -3  21   5   20.37    5.18
  -3  21   6  289.93   18.07
  -3  21   7   50.26    9.14
  -3  21   8  124.82   12.82
  -3  21   9   64.31    6.30
  -3  21  10   46.43    6.71
  -3  21  11   92.07   13.56
  -3  21  12    2.26    5.02
  -3  21  13   70.63   12.32
  -3  22  -2  697.08   21.51
  -3  22  -1   16.78   14.87
  -3  22   0  351.92   27.92
  -3  22   1    1.96    4.63
  -3  22   2   56.26    6.29
  -3  22   3    0.37    3.03
  -3  22   4    2.11    2.53
  -3  22   5   28.43    4.40
  -3  22   6   30.58    5.72
  -3  22   7   78.98   12.60
  -3  22   8  151.46   14.13
  -3  22   9   48.84   13.11
  -3  22  10  288.62   22.88
  -3  22  11   21.75    7.81
  -3  23  -2   16.90    6.45
  -3  23  -1   37.65    9.52
  -3  23   0  262.54   22.89
  -3  23   1  114.49   15.05
  -3  23   2  411.65   26.61
  -3  23   3  138.96   15.12
  -3  23   4  335.99   24.83
  -3  23   5  150.12   17.49
  -3  23   6  315.65   24.84
  -3  23   7  112.68   14.83
  -3  23   8  173.71   18.35
  -3  23   9   21.60    9.24
  -3  24  -2  302.37   23.46
  -3  24  -1  211.13   19.32
  -3  24   0  161.43   17.24
  -3  24   1  120.45   16.30
  -3  24   2   17.91    6.94
  -3  24   3   15.03    5.20
  -3  24   4    6.35    4.63
  -3  24   5    0.01    5.62
  -3  24   6   59.45   12.17
  -2   0   6 1156.45   14.59
  -2   0  10  124.71    2.99
  -2   0  12    2.63    1.21
  -2   0  14   45.53    6.10
  -2   0  16   55.09    7.70
  -2   0  18    0.82    4.44
  -2   0  20    1.80    6.81
  -2   0  22   18.85    5.49
  -2   0  24   62.77   10.90
  -2   1   4   60.54    5.05
  -2   1   5  366.66   16.23
  -2   1   6  209.85    6.36
  -2   1   7  142.74    3.94
  -2   1   8  218.10    5.05
  -2   1   9    0.78    1.58
  -2   1  10  444.30    7.12
  -2   1  11  316.50    5.50
  -2   1  12   71.16    2.08
  -2   1  13  187.50    5.97
  -2   1  14   20.39    4.18
  -2   1  15   53.17    3.24
  -2   1  16    2.20    2.65
  -2   1  17   64.83    6.95
  -2   1  18  199.52    7.76
  -2   1  19   11.10    2.81
  -2   1  20  234.90   12.95
  -2   1  21    0.04    4.12
  -2   1  22   76.92    9.42
  -2   1  23    0.02    3.83
  -2   1  24   47.59    6.51
  -2   2  -1 1806.83   39.39
  -2   2   3 1913.28   22.33
  -2   2   6 1359.46   21.19
  -2   2   7  612.14   11.27
  -2   2   8 1063.05   16.22
  -2   2   9  399.09    7.47
  -2   2  10   32.35    1.69
  -2   2  11  187.51    4.48
  -2   2  12   92.24    3.94
  -2   2  13    6.67    1.58
  -2   2  14  106.27    4.27
  -2   2  15   15.53    9.07
  -2   2  16   10.90    3.77
  -2   2  17   24.64   12.67
  -2   2  18   27.27    3.65
  -2   2  19   15.14    2.58
  -2   2  20  111.05    5.91
  -2   2  21  118.79    8.97
  -2   2  22   10.73    6.85
  -2   2  23   88.63    9.33
  -2   2  24    0.40    4.46
  -2   3  -1 2295.24   32.22
  -2   3   0 1537.71   26.33
  -2   3   3  947.08   14.15
  -2   3   5  933.33   29.96
  -2   3   6   80.40    3.69
  -2   3   7  105.85    6.64
  -2   3   8  960.68   10.13
  -2   3   9  282.43    5.77
  -2   3  10 1956.12   18.87
  -2   3  11  542.65   12.79
  -2   3  12  916.00   20.74
  -2   3  13  666.64   10.86
  -2   3  14  425.02   10.12
  -2   3  15  458.97   18.86
  -2   3  16  195.49   10.62
  -2   3  17  216.33   11.74
  -2   3  18   11.20    2.87
  -2   3  19   64.18    5.18
  -2   3  20   22.37    3.15
  -2   3  21   28.13    3.96
  -2   3  22   64.26   15.28
  -2   3  23    0.06    3.26
  -2   3  24   44.87   10.09
  -2   4  -1    9.31    2.88
  -2   4   1   14.90    2.83
  -2   4   2 1654.31   27.66
  -2   4   3 2438.63   35.18
  -2   4   4 4609.64  132.45
  -2   4   5  390.41   20.04
  -2   4   6 5471.58   67.14
  -2   4   7  131.68    4.96
  -2   4   8 3029.07   54.53
  -2   4   9    0.45    1.21
  -2   4  10  599.15   10.48
  -2   4  11  122.37    3.58
  -2   4  12   38.42    2.55
  -2   4  13    8.15    2.19
  -2   4  14   72.98    4.58
  -2   4  15   49.95   17.71
  -2   4  16  324.98   13.58
  -2   4  17  157.83   12.23
  -2   4  18  247.88    8.84
  -2   4  19   14.74    3.39
  -2   4  20  361.61   13.66
  -2   4  21   47.12    9.23
  -2   4  22  199.63   18.50
  -2   4  23   23.09    9.78
  -2   4  24   61.62   12.63
  -2   5   0 2605.13   36.42
  -2   5   2 1925.91   15.68
  -2   5   3  882.57   13.82
  -2   5   5   70.40    6.97
  -2   5   6  466.00   15.78
  -2   5   7   26.98    2.78
  -2   5   8 1341.72   31.18
  -2   5   9   28.72    2.83
  -2   5  10 1694.77   21.02
  -2   5  11   14.31    2.39
  -2   5  12 2021.31   23.74
  -2   5  13   29.92    5.19
  -2   5  14 1650.96   44.86
  -2   5  15    0.69    4.95
  -2   5  16  604.22   28.52
  -2   5  17    0.01    4.92
  -2   5  18  156.12   11.80
  -2   5  19    4.06    3.82
  -2   5  20   13.06    4.10
  -2   5  21   12.93    6.12
  -2   5  22   35.59   10.31
  -2   5  23    1.53    4.67
  -2   5  24   50.83   10.46
  -2   6  -1  318.15   12.36
  -2   6   0  607.19    8.76
  -2   6   1  174.57    5.95
  -2   6   2 2394.15   26.69
  -2   6   3  318.98    9.72
  -2   6   4 4726.95   54.52
  -2   6   5  332.55    5.99
  -2   6   6 2121.97   31.73
  -2   6   7    0.36    1.76
  -2   6   8  642.34   15.70
  -2   6   9  228.02   11.52
  -2   6  10  969.91   18.78
  -2   6  11  218.17    7.63
  -2   6  12  212.29    8.84
  -2   6  13   30.08    3.76
  -2   6  14   35.29    7.51
  -2   6  15   12.36    5.64
  -2   6  16  315.22   20.19
  -2   6  17    0.05    7.87
  -2   6  18  309.30   12.18
  -2   6  19   10.40    3.23
  -2   6  20  403.48   14.37
  -2   6  21    8.74    5.73
  -2   6  22  127.57   14.58
  -2   6  23   25.85    6.66
  -2   6  24   44.09   10.45
  -2   7  -1  111.76    6.28
  -2   7   0 2442.31   31.46
  -2   7   2  302.66    7.33
  -2   7   3  104.77   11.33
  -2   7   5  799.89   16.13
  -2   7   6  102.63    5.13
  -2   7   7  645.25   16.55
  -2   7   8  185.21    9.25
  -2   7   9  313.89   16.38
  -2   7  10  758.29   25.31
  -2   7  11  245.84   14.57
  -2   7  12  837.19   23.07
  -2   7  13  233.21   14.98
  -2   7  14  459.11   21.70
  -2   7  15  191.11   15.12
  -2   7  16  160.44   14.81
  -2   7  17  134.14    7.74
  -2   7  18    8.28    7.74
  -2   7  19   43.82    5.14
  -2   7  20   12.06    3.62
  -2   7  21   34.38    8.07
  -2   7  22   46.74   10.73
  -2   7  23    4.79    4.59
  -2   8  -1  555.97   24.27
  -2   8   0    1.68    2.40
  -2   8   1  646.74   17.99
  -2   8   2  142.49    7.88
  -2   8   3  754.26   10.15
  -2   8   4  330.22    5.17
  -2   8   5  287.45   11.63
  -2   8   6  252.91   10.29
  -2   8   7  110.06    6.42
  -2   8   8  184.95    6.59
  -2   8   9   70.58    8.41
  -2   8  10    5.43    3.24
  -2   8  11   67.61    7.51
  -2   8  12  107.73   12.11
  -2   8  13   36.90    8.00
  -2   8  14   89.17    9.76
  -2   8  15   19.20    4.05
  -2   8  16   51.29    5.53
  -2   8  17    1.12    2.39
  -2   8  18   11.07    2.96
  -2   8  19   13.67    2.76
  -2   8  20   41.95    9.10
  -2   8  21   29.93    8.69
  -2   8  22    0.57    4.74
  -2   8  23   36.58    8.96
  -2   9  -1  285.89   14.82
  -2   9   0  196.22   10.61
  -2   9   1   86.91    5.44
  -2   9   3  246.42    6.12
  -2   9   4  380.74   10.10
  -2   9   6   82.52    5.59
  -2   9   7    9.09    2.82
  -2   9   8   12.52    3.96
  -2   9   9    8.70    3.85
  -2   9  10   65.09    7.31
  -2   9  11    4.13    3.88
  -2   9  12    8.86    4.04
  -2   9  13    0.60    3.23
  -2   9  14    7.91    3.48
  -2   9  15   10.53    2.73
  -2   9  16   44.91    4.92
  -2   9  17   35.24    4.19
  -2   9  18  112.19    7.88
  -2   9  19   22.64    3.89
  -2   9  20  106.84   12.67
  -2   9  21    9.48    5.22
  -2   9  22   48.13    9.96
  -2   9  23    0.87    5.65
  -2  10  -1   22.76    3.10
  -2  10   0 1125.84   51.46
  -2  10   1  196.00   12.21
  -2  10   3  514.19   14.15
  -2  10   4   35.71    4.13
  -2  10   5  384.58   12.15
  -2  10   6   19.68    4.44
  -2  10   7   66.58    5.81
  -2  10   8  106.07    5.78
  -2  10   9   63.29    6.65
  -2  10  10   90.48    9.49
  -2  10  11   43.20    6.30
  -2  10  12  106.80   10.91
  -2  10  13    1.43    3.86
  -2  10  14   98.99   10.64
  -2  10  15  109.05    6.77
  -2  10  16   21.11    3.51
  -2  10  17  109.90    7.44
  -2  10  18    1.16    2.69
  -2  10  19   51.69    7.29
  -2  10  20    0.01    4.01
  -2  10  21    5.59    5.03
  -2  10  22   23.01    6.47
  -2  11  -1  540.23   19.72
  -2  11   0  169.55    7.89
  -2  11   1  666.68   17.28
  -2  11   2  344.97   14.48
  -2  11   3   53.59    5.48
  -2  11   4  274.27    8.36
  -2  11   5   17.71    2.69
  -2  11   6    2.18    2.51
  -2  11   7   89.36    9.11
  -2  11   8   70.73    4.18
  -2  11   9  258.62   14.19
  -2  11  10   76.91    8.02
  -2  11  11  298.78   20.40
  -2  11  12   14.07    5.65
  -2  11  13  287.29   17.06
  -2  11  14   16.27    4.59
  -2  11  15  287.24   12.26
  -2  11  16    3.47    4.17
  -2  11  17  101.29    7.27
  -2  11  18   85.02    6.75
  -2  11  19    6.71    6.19
  -2  11  20   49.50   10.81
  -2  11  21    0.05    5.85
  -2  11  22   22.72    7.50
  -2  12  -1  858.70   19.35
  -2  12   0   12.26    6.02
  -2  12   1 1094.67   20.47
  -2  12   2  150.75    9.08
  -2  12   3 1094.79   27.17
  -2  12   4  206.64   10.92
  -2  12   5  991.67   24.64
  -2  12   6  258.08   15.41
  -2  12   7  688.86   26.12
  -2  12   8  229.18   10.19
  -2  12   9  445.98   14.22
  -2  12  10    2.58    4.73
  -2  12  11  160.15   13.91
  -2  12  12   44.72    7.20
  -2  12  13    4.23    3.84
  -2  12  14   50.55    8.85
  -2  12  15   73.67    8.91
  -2  12  16   88.51    7.02
  -2  12  17   99.59    7.67
  -2  12  18   57.94    5.97
  -2  12  19  164.64   16.63
  -2  12  20   23.35    7.01
  -2  12  21  107.56   14.86
  -2  13  -1 1048.53   25.82
  -2  13   0  813.80   17.77
  -2  13   1  935.06   21.16
  -2  13   2  455.84   18.41
  -2  13   3  235.56   11.75
  -2  13   4  215.37   13.39
  -2  13   5   16.46    3.26
  -2  13   6   20.28    6.62
  -2  13   7  167.56   12.73
  -2  13   8  159.71    9.33
  -2  13   9  273.28   14.12
  -2  13  10  526.26   24.88
  -2  13  11  623.53   25.86
  -2  13  12  435.63   22.11
  -2  13  13  608.82   29.08
  -2  13  14  282.65   20.41
  -2  13  15  284.89   20.86
  -2  13  16  148.47    8.98
  -2  13  17   99.00    7.75
  -2  13  18   47.92    5.69
  -2  13  19   29.61    7.39
  -2  13  20    1.32    5.86
  -2  13  21    0.04    5.89
  -2  14  -1    2.94    2.35
  -2  14   0  721.04   17.81
  -2  14   1  164.75    8.74
  -2  14   2 1125.06   22.68
  -2  14   3  775.80   23.21
  -2  14   4 1832.83   46.12
  -2  14   5  586.90   23.67
  -2  14   6 2066.83   44.09
  -2  14   7  317.58   15.63
  -2  14   8 1322.39   38.55
  -2  14   9   16.20    4.43
  -2  14  10  228.10   11.04
  -2  14  11   20.52    4.88
  -2  14  12    3.16    4.14
  -2  14  13    0.44    4.22
  -2  14  14   24.21    8.08
  -2  14  15  107.46   12.76
  -2  14  16   82.19   10.56
  -2  14  17   78.11    9.05
  -2  14  18  171.34   16.73
  -2  14  19   47.08    9.83
  -2  14  20  199.37   19.33
  -2  15  -1   61.69    5.21
  -2  15   0  768.47   24.57
  -2  15   1  214.10    9.65
  -2  15   2  523.46   34.18
  -2  15   3  128.49   10.77
  -2  15   4   65.43    7.97
  -2  15   5    0.88    3.25
  -2  15   6   39.33    5.42
  -2  15   7   59.39    6.49
  -2  15   8  141.25   13.31
  -2  15   9   69.45    5.48
  -2  15  10  543.35   18.33
  -2  15  11  125.37   13.88
  -2  15  12  787.25   33.49
  -2  15  13   79.17   10.13
  -2  15  14  681.46   31.63
  -2  15  15    1.48    3.95
  -2  15  16  333.93   24.19
  -2  15  17   17.23    4.14
  -2  15  18  104.49   14.05
  -2  15  19    7.50    5.02
  -2  15  20   10.41    6.50
  -2  16  -1   49.81    6.09
  -2  16   0  152.37    9.57
  -2  16   1   30.49   12.11
  -2  16   2  532.84   17.86
  -2  16   3   25.63    7.68
  -2  16   4 1211.34   35.61
  -2  16   5   20.90    6.34
  -2  16   6 1097.66   33.68
  -2  16   7   26.59    7.54
  -2  16   8  478.82   21.05
  -2  16   9    8.39    2.97
  -2  16  10  112.59    8.14
  -2  16  11    1.16    3.82
  -2  16  12   16.58    6.26
  -2  16  13    8.23    6.61
  -2  16  14    5.47    6.11
  -2  16  15   31.93    9.48
  -2  16  16  171.89   17.05
  -2  16  17   19.65    7.70
  -2  16  18  194.08   19.37
  -2  16  19    9.53    6.18
  -2  17  -1    0.03    2.26
  -2  17   0  175.61    9.41
  -2  17   1    0.31    2.65
  -2  17   2  256.75   12.15
  -2  17   3   42.14    6.06
  -2  17   4   50.83    7.10
  -2  17   5   30.17    5.28
  -2  17   6    0.06    4.23
  -2  17   7   97.98   10.66
  -2  17   8   44.61    7.09
  -2  17   9  110.09   11.64
  -2  17  10  201.15   21.25
  -2  17  11   18.12    7.87
  -2  17  12  188.87   16.28
  -2  17  13   40.56    7.85
  -2  17  14   82.99   11.83
  -2  17  15   42.45    8.73
  -2  17  16   14.75    4.14
  -2  17  17   54.93    9.92
  -2  17  18    1.06    4.96
  -2  18  -1  402.65   22.35
  -2  18   0   20.53    4.05
  -2  18   1  164.87    9.58
  -2  18   2    3.00    2.56
  -2  18   3   92.63    6.47
  -2  18   4   51.83    5.16
  -2  18   5   40.19    5.59
  -2  18   6   31.02    6.87
  -2  18   7    3.93    4.42
  -2  18   8   26.81    6.36
  -2  18   9    6.52    3.88
  -2  18  10    0.31    3.09
  -2  18  11   28.53    4.98
  -2  18  12   50.98   10.34
  -2  18  13   26.18    7.35
  -2  18  14   36.76    8.10
  -2  18  15   12.35    6.04
  -2  18  16   26.31    7.59
  -2  18  17    1.65    6.22
  -2  19  -1   31.84    5.14
  -2  19   0   89.06    7.59
  -2  19   1  239.95   11.09
  -2  19   2   61.77    5.65
  -2  19   3  133.36   20.69
  -2  19   4    2.12    2.51
  -2  19   5    0.31    3.64
  -2  19   6   56.79    9.47
  -2  19   7    5.69    3.92
  -2  19   8   27.06    4.92
  -2  19   9    1.17    4.87
  -2  19  10    4.55    3.04
  -2  19  11    0.00    2.94
  -2  19  12    0.34    4.36
  -2  19  13    1.62    4.52
  -2  19  14   13.00    6.17
  -2  19  15    3.37    5.82
  -2  19  16   50.19    9.80
  -2  20  -1    3.91    2.73
  -2  20   0  181.27   10.83
  -2  20   1   17.94    3.81
  -2  20   2   60.90    6.31
  -2  20   3  203.11   10.95
  -2  20   4   33.24    5.28
  -2  20   5  279.84   13.48
  -2  20   6   42.41    7.30
  -2  20   7  107.91   12.44
  -2  20   8   11.37    5.84
  -2  20   9   91.46   10.99
  -2  20  10   10.24    3.35
  -2  20  11   56.17    6.85
  -2  20  12   15.58    7.08
  -2  20  13    2.40    5.05
  -2  20  14    7.30    5.14
  -2  20  15   21.43    7.36
  -2  21  -1  353.00   15.12
  -2  21   0   19.47    4.12
  -2  21   1  190.59   11.76
  -2  21   2   72.93    8.36
  -2  21   3   86.70    8.74
  -2  21   4    9.53    4.03
  -2  21   5    0.84    2.73
  -2  21   6    0.01    3.17
  -2  21   7   81.62   10.71
  -2  21   8    2.95    3.50
  -2  21   9  235.02   18.34
  -2  21  10   10.60    4.37
  -2  21  11  322.43   16.28
  -2  21  12    9.99    7.30
  -2  21  13  325.66   24.31
  -2  22  -1  113.91    9.19
  -2  22   0    4.63    4.92
  -2  22   1  466.77   17.40
  -2  22   2   20.46    4.91
  -2  22   3  534.62   31.42
  -2  22   4   38.56    6.58
  -2  22   5  555.45   20.91
  -2  22   6   71.09    7.79
  -2  22   7  470.55   18.72
  -2  22   8   26.36    6.82
  -2  22   9  258.31   20.30
  -2  22  10    4.46    3.51
  -2  22  11   68.01    7.85
  -2  23  -1  528.25   24.99
  -2  23   0  108.53   13.19
  -2  23   1  208.48   25.67
  -2  23   2   22.65    4.18
  -2  23   3   45.86    6.07
  -2  23   4   23.09    4.71
  -2  23   5    4.15    5.98
  -2  23   6    0.00    3.16
  -2  23   7   74.36    8.84
  -2  23   8   56.11    7.78
  -2  23   9  176.41   16.87
  -2  24  -1    7.74    4.70
  -2  24   0  132.55   14.89
  -2  24   1   65.50   10.99
  -2  24   2  259.01   14.11
  -2  24   3  161.71   12.44
  -2  24   4  309.58   27.73
  -2  24   5  214.63   13.54
  -2  24   6  382.46   17.61
  -1   0   9   65.37    2.92
  -1   0  11    0.96    1.60
  -1   0  13   12.83    2.52
  -1   0  15   35.88    5.35
  -1   0  17    0.71    2.47
  -1   0  19    1.41    3.46
  -1   0  21   18.63    4.37
  -1   0  23    0.04    5.15
  -1   1   4  510.13    4.46
  -1   1   6  183.70    2.11
  -1   1   8   89.39    1.68
  -1   1   9  407.72    5.27
  -1   1  10   91.02    3.18
  -1   1  11  383.61    6.11
  -1   1  12   18.70    1.69
  -1   1  13  219.00    6.90
  -1   1  14   28.43    5.13
  -1   1  15  109.60   12.44
  -1   1  16    7.09    1.91
  -1   1  17   47.30    3.79
  -1   1  18    0.80    2.34
  -1   1  19   31.46    6.48
  -1   1  20   27.29    3.76
  -1   1  21    1.10    2.75
  -1   1  22   43.41    6.05
  -1   1  23    0.04    4.82
  -1   1  24   30.06    5.48
  -1   2   3 4549.41   45.54
  -1   2   4 1275.81   18.77
  -1   2   6  310.68    6.31
  -1   2   7  502.06    6.43
  -1   2   8  529.72    8.21
  -1   2   9   65.54    2.91
  -1   2  10  746.36    9.50
  -1   2  11   87.00    4.03
  -1   2  12  919.82   12.41
  -1   2  13  187.84    5.78
  -1   2  14  335.71   13.27
  -1   2  15  218.15   10.71
  -1   2  16  279.83   12.60
  -1   2  17   55.29    3.90
  -1   2  18   19.17    2.64
  -1   2  19   10.38    2.69
  -1   2  20   43.56    3.94
  -1   2  21    2.22    2.30
  -1   2  22    0.01    3.96
  -1   2  23    4.83    3.82
  -1   2  24   14.01    4.05
  -1   3   3   31.26    2.06
  -1   3   5  272.01    8.78
  -1   3   7 1656.78   15.50
  -1   3   8  674.64    9.15
  -1   3   9 1724.49   15.27
  -1   3  10  159.77    3.61
  -1   3  11  639.18   10.34
  -1   3  12    5.78    1.82
  -1   3  13   84.08    6.07
  -1   3  14   56.43    5.54
  -1   3  15    1.93    3.00
  -1   3  16  132.64    8.94
  -1   3  17   52.35    4.06
  -1   3  18  123.24    6.51
  -1   3  19  304.62   10.78
  -1   3  20  144.43    7.51
  -1   3  21  202.53    9.03
  -1   3  22  123.58    7.83
  -1   3  23  103.29   13.10
  -1   3  24   81.77   13.12
  -1   4   1 2844.97   37.96
  -1   4   4  707.33   14.48
  -1   4   5   60.65    8.82
  -1   4   6  103.90    7.87
  -1   4   7    3.49    2.20
  -1   4   8   63.12    2.63
  -1   4   9  429.24    9.03
  -1   4  10  130.91    3.65
  -1   4  11 1105.18   14.66
  -1   4  12  287.81    8.34
  -1   4  13  973.71   22.43
  -1   4  14   78.15    5.75
  -1   4  15  707.80   19.28
  -1   4  16  163.54    6.40
  -1   4  17  552.80   20.90
  -1   4  18    4.96    2.91
  -1   4  19  286.92   18.25
  -1   4  20    8.75    9.11
  -1   4  21   20.44   11.18
  -1   4  22   23.47    8.86
  -1   4  23   20.60    7.89
  -1   4  24   14.92    7.40
  -1   5   1  499.75   12.39
  -1   5   2   72.26    4.38
  -1   5   3  478.51    5.73
  -1   5   4   78.96    3.04
  -1   5   5 1241.44   26.86
  -1   5   6  365.43   15.47
  -1   5   7 1871.30   40.46
  -1   5   8    7.08    3.77
  -1   5   9 1734.79   28.13
  -1   5  10   31.66    1.57
  -1   5  11  574.14   11.02
  -1   5  12   53.37    3.05
  -1   5  13   32.96    6.21
  -1   5  14   21.60    6.41
  -1   5  15   23.02    5.60
  -1   5  16    2.05    4.29
  -1   5  17  235.39   17.94
  -1   5  18   23.49    3.41
  -1   5  19  692.02   33.46
  -1   5  20   27.84    5.11
  -1   5  21  551.32   17.20
  -1   5  22   10.50    7.12
  -1   5  23  285.26   21.53
  -1   5  24    1.68    6.12
  -1   6   0  126.23    5.59
  -1   6   2  266.27    2.41
  -1   6   3  946.89   13.23
  -1   6   6  479.57    8.57
  -1   6   7  157.59    6.10
  -1   6   8  299.70   11.20
  -1   6   9  693.48   15.66
  -1   6  10  238.29    9.70
  -1   6  11 1043.60   18.41
  -1   6  12   65.64   10.42
  -1   6  13 1089.63   33.84
  -1   6  14   34.39    5.29
  -1   6  15  411.99   19.18
  -1   6  16    5.92    2.75
  -1   6  17  417.24   14.03
  -1   6  18   38.53    4.73
  -1   6  19  251.49   20.35
  -1   6  20    3.15    2.87
  -1   6  21    1.77    5.46
  -1   6  22    4.39    5.72
  -1   6  23   23.48    7.32
  -1   6  24    3.12    4.56
  -1   7   0  622.74   14.45
  -1   7   1   94.67   11.31
  -1   7   2 1316.15   69.25
  -1   7   3  209.43   11.32
  -1   7   4  670.58   11.42
  -1   7   5  413.79    8.16
  -1   7   6    8.22    2.20
  -1   7   7  556.34   11.35
  -1   7   8    4.70    3.83
  -1   7   9  589.13   21.21
  -1   7  10    9.93    4.22
  -1   7  11  318.18   18.34
  -1   7  12    8.38    6.46
  -1   7  13   43.57    5.49
  -1   7  14   20.59    3.52
  -1   7  15    2.25    2.14
  -1   7  16   57.27    5.90
  -1   7  17   75.59    7.01
  -1   7  18  125.99   16.52
  -1   7  19  238.51   11.13
  -1   7  20   72.18    6.52
  -1   7  21  158.17   17.02
  -1   7  22   40.94    8.35
  -1   7  23   80.25   12.01
  -1   8   0    4.72    3.28
  -1   8   1 1235.52   22.12
  -1   8   2  278.65   13.82
  -1   8   3 1808.01   56.63
  -1   8   4 1091.44   12.28
  -1   8   5  366.76    9.20
  -1   8   6  542.37   12.95
  -1   8   7  763.72   23.78
  -1   8   8  734.20   23.13
  -1   8   9   80.61    7.47
  -1   8  10  601.59   23.48
  -1   8  11    5.91    4.17
  -1   8  12  232.80   13.29
  -1   8  13  130.00   10.58
  -1   8  14   47.58    5.62
  -1   8  15   51.29    5.07
  -1   8  16  104.96   10.74
  -1   8  17   71.17    5.72
  -1   8  18   28.57    3.53
  -1   8  19   16.80    4.58
  -1   8  20    0.04    7.11
  -1   8  21    0.37    5.78
  -1   8  22    0.06    5.54
  -1   8  23    2.30    4.84
  -1   9   0  482.47   10.68
  -1   9   1 3410.97   49.75
  -1   9   2  683.93   19.97
  -1   9   3  763.45   35.17
  -1   9   4  362.39   12.62
  -1   9   5  107.07    7.67
  -1   9   6    9.05    4.08
  -1   9   7  109.19    6.58
  -1   9   8    1.77    2.04
  -1   9   9  501.23   19.84
  -1   9  10   62.87    8.93
  -1   9  11  338.97   19.23
  -1   9  12  193.47   13.55
  -1   9  13   89.77    6.89
  -1   9  14   29.70    3.88
  -1   9  15   76.82    5.93
  -1   9  16    2.46    2.37
  -1   9  17   40.37    5.03
  -1   9  18    2.14    2.59
  -1   9  19    0.08    2.22
  -1   9  20    5.14    2.68
  -1   9  21    0.19    4.81
  -1   9  22    1.65    5.32
  -1   9  23    0.31    5.58
  -1  10   0   13.26    2.25
  -1  10   1  142.47   11.27
  -1  10   2   99.10    7.52
  -1  10   3 1465.12   34.20
  -1  10   4  560.07   22.10
  -1  10   5 1292.28   21.03
  -1  10   6   39.31    6.11
  -1  10   7  669.54   22.08
  -1  10   8   10.64    2.37
  -1  10   9  193.80    9.23
  -1  10  10   18.49    6.47
  -1  10  11   81.66    7.73
  -1  10  12    4.40    3.70
  -1  10  13    5.32    3.59
  -1  10  14   75.80    6.36
  -1  10  15   14.39    3.24
  -1  10  16   57.85    5.41
  -1  10  17    0.16    2.50
  -1  10  18   26.04    3.69
  -1  10  19    0.42    2.68
  -1  10  20   15.07    2.79
  -1  10  21    0.56    5.78
  -1  10  22    9.67    4.78
  -1  11   0  275.06    8.30
  -1  11   1 2551.85   49.29
  -1  11   2  582.15   21.66
  -1  11   3  474.81   16.03
  -1  11   4  414.99   15.57
  -1  11   5   60.40    7.66
  -1  11   6  499.44   14.34
  -1  11   7   54.58    6.93
  -1  11   8  302.41   12.14
  -1  11   9  132.55   18.59
  -1  11  10  147.26   10.82
  -1  11  11  191.77   13.98
  -1  11  12   90.09   11.05
  -1  11  13  179.58   14.09
  -1  11  14    4.92    4.68
  -1  11  15   45.30   10.23
  -1  11  16   49.51    4.77
  -1  11  17    2.11    2.76
  -1  11  18   84.54    9.37
  -1  11  19    5.70    2.59
  -1  11  20   66.17   11.10
  -1  11  21    0.11    4.94
  -1  11  22   82.63   12.79
  -1  12   0 1040.30   16.63
  -1  12   1 1064.57   18.57
  -1  12   2  531.32   21.35
  -1  12   3 1253.43   31.24
  -1  12   4  222.40   10.99
  -1  12   5  419.45   19.64
  -1  12   6   90.07    6.90
  -1  12   7  148.37    8.63
  -1  12   8  140.97   10.67
  -1  12   9    5.23    2.78
  -1  12  10  260.15   10.99
  -1  12  11    8.03    4.03
  -1  12  12  542.02   25.05
  -1  12  13   94.44   10.22
  -1  12  14  542.18   25.55
  -1  12  15  170.69   17.10
  -1  12  16  230.54   11.58
  -1  12  17   83.24    6.85
  -1  12  18  124.51    8.14
  -1  12  19   22.84    6.13
  -1  12  20   30.76    8.62
  -1  12  21    8.80    6.34
  -1  13   0  319.82   12.23
  -1  13   1    2.18    3.19
  -1  13   2  480.90   20.63
  -1  13   3  363.74   14.53
  -1  13   4  402.39   16.37
  -1  13   5  673.69   25.70
  -1  13   6  794.51   28.93
  -1  13   7  672.24   24.43
  -1  13   8  727.80   25.03
  -1  13   9  433.47   32.34
  -1  13  10  237.39   11.08
  -1  13  11  279.01   17.93
  -1  13  12  127.14   12.52
  -1  13  13   87.47   11.15
  -1  13  14   19.51    6.18
  -1  13  15    2.63    4.78
  -1  13  16  100.54    8.48
  -1  13  17   12.31    3.34
  -1  13  18  119.02    9.07
  -1  13  19  107.37    8.21
  -1  13  20  173.53   16.44
  -1  13  21  144.58   16.30
  -1  14   0  431.33   18.08
  -1  14   1  790.14   20.14
  -1  14   2  140.03    8.30
  -1  14   3  360.86   15.34
  -1  14   4   68.21    8.39
  -1  14   5   16.80    4.85
  -1  14   6    3.04    5.11
  -1  14   7   12.96    4.87
  -1  14   8   34.38    6.57
  -1  14   9  192.83    8.77
  -1  14  10  145.06   10.16
  -1  14  11  374.64   22.40
  -1  14  12  405.34   23.35
  -1  14  13  563.30   26.59
  -1  14  14  268.24   18.55
  -1  14  15  423.23   23.63
  -1  14  16  131.40   14.31
  -1  14  17  258.70   12.96
  -1  14  18   17.68    3.41
  -1  14  19  146.75   16.42
  -1  14  20   20.76    8.94
  -1  15   0  259.17   12.30
  -1  15   1  347.55   12.90
  -1  15   2   65.62    5.27
  -1  15   3  721.69   22.74
  -1  15   4   27.19    6.26
  -1  15   5 1233.23   37.00
  -1  15   6   62.38    8.48
  -1  15   7 1240.61   38.40
  -1  15   8  127.27   11.81
  -1  15   9  494.08   24.32
  -1  15  10   12.48    8.58
  -1  15  11   79.98    6.68
  -1  15  12   79.93   10.56
  -1  15  13    4.62    4.78
  -1  15  14    2.86    4.70
  -1  15  15   20.16    6.69
  -1  15  16   28.95    7.34
  -1  15  17  116.39    8.70
  -1  15  18   37.08    4.89
  -1  15  19  232.26   21.00
  -1  16   0   77.81    7.17
  -1  16   1  380.11   12.33
  -1  16   2  274.10   11.31
  -1  16   3  220.12   14.97
  -1  16   4  350.14   19.51
  -1  16   5  103.13   11.41
  -1  16   6  184.91   14.09
  -1  16   7   33.31    7.36
  -1  16   8  325.27   17.90
  -1  16   9  191.48   14.65
  -1  16  10  169.54   10.14
  -1  16  11  287.77   13.36
  -1  16  12   17.47    6.32
  -1  16  13  256.78   19.13
  -1  16  14    6.86    4.79
  -1  16  15  241.41   20.80
  -1  16  16    0.15    4.71
  -1  16  17  105.54    7.94
  -1  16  18    1.65    2.90
  -1  16  19   47.75    9.95
  -1  17   0  609.31   17.52
  -1  17   1   24.18    6.52
  -1  17   2  545.41   17.99
  -1  17   3   17.60   12.81
  -1  17   4  245.22   15.76
  -1  17   5  209.53   14.98
  -1  17   6    6.85    4.41
  -1  17   7  188.78   14.04
  -1  17   8    9.81    4.38
  -1  17   9  116.48   11.42
  -1  17  10   14.84    3.74
  -1  17  11   55.29   11.58
  -1  17  12   32.68    7.45
  -1  17  13    5.40    4.01
  -1  17  14   27.10    8.46
  -1  17  15    0.18    7.21
  -1  17  16   31.84    6.64
  -1  17  17   32.06    8.37
  -1  17  18   23.21    8.19
  -1  18   0   51.22    6.46
  -1  18   1  167.49    9.80
  -1  18   2  172.86   10.24
  -1  18   3  297.61   12.98
  -1  18   4  348.14   13.95
  -1  18   5  357.83   21.07
  -1  18   6  434.39   21.20
  -1  18   7  352.10   21.63
  -1  18   8  305.44   20.84
  -1  18   9   82.43   10.34
  -1  18  10  103.91   11.95
  -1  18  11   14.53    3.95
  -1  18  12   73.19   11.04
  -1  18  13    3.51    4.64
  -1  18  14   10.07    5.42
  -1  18  15   11.45    5.73
  -1  18  16    0.09    6.10
  -1  18  17    3.30    4.78
  -1  19   0  320.72   13.95
  -1  19   1  539.12   23.31
  -1  19   2  266.99   12.52
  -1  19   3  252.62   12.90
  -1  19   4   60.73    6.99
  -1  19   5  117.91   12.42
  -1  19   6    2.11    3.75
  -1  19   7    3.18    3.28
  -1  19   8   80.10   10.96
  -1  19   9    8.06    5.01
  -1  19  10  100.16    8.98
  -1  19  11   44.83    6.12
  -1  19  12   71.26   10.45
  -1  19  13   65.68   11.71
  -1  19  14   27.10    6.54
  -1  19  15   38.39    8.11
  -1  19  16    0.01    4.14
  -1  20   0   55.85    6.37
  -1  20   1  162.41   10.48
  -1  20   2  138.35   15.56
  -1  20   3  275.67   14.20
  -1  20   4  103.77    9.19
  -1  20   5  307.36   13.33
  -1  20   6   34.82    7.70
  -1  20   7  201.48   16.81
  -1  20   8    1.86    3.88
  -1  20   9  158.58   14.35
  -1  20  10    0.58    2.74
  -1  20  11  162.90   11.85
  -1  20  12   46.17    9.89
  -1  20  13   49.64   10.59
  -1  20  14  140.26   16.88
  -1  21   0    5.44    3.55
  -1  21   1  229.62   12.97
  -1  21   2   67.20    6.54
  -1  21   3  151.10    9.37
  -1  21   4  206.18   19.22
  -1  21   5   22.01    4.76
  -1  21   6  230.44   20.34
  -1  21   7    7.34    3.98
  -1  21   8  119.61   13.20
  -1  21   9    3.21    5.12
  -1  21  10  196.70   12.68
  -1  21  11   30.46    6.71
  -1  21  12   64.33   10.81
  -1  21  13   30.21    7.74
  -1  22   0  203.52   11.84
  -1  22   1   34.51    5.48
  -1  22   2  130.81    9.50
  -1  22   3  107.45    8.56
  -1  22   4    8.55    4.08
  -1  22   5  128.92   10.66
  -1  22   6    8.33    5.70
  -1  22   7   15.50    4.50
  -1  22   8   80.65   10.89
  -1  22   9    7.50    6.09
  -1  22  10  174.90   12.49
  -1  22  11    7.93    5.45
  -1  23   0   21.99    5.10
  -1  23   1   49.65    6.05
  -1  23   2  135.81   10.99
  -1  23   3   65.48    7.39
  -1  23   4  237.19   12.94
  -1  23   5  108.08    9.33
  -1  23   6  368.95   22.18
  -1  23   7  190.09   13.24
  -1  23   8  248.19   20.14
  -1  23   9   76.59   10.94
  -1  24   0  112.51    9.20
  -1  24   1   54.41    7.32
  -1  24   2  141.82   10.73
  -1  24   3   17.89    5.65
  -1  24   4   63.78    7.41
  -1  24   5    1.09    3.21
  -1  24   6    1.43    4.47
   0   0   4  680.85   18.60
   0   0  10 1150.71   15.25
   0   0  12 1291.55   22.08
   0   0  14 1098.79   32.79
   0   0  16  807.28   21.30
   0   0  18  386.25   18.51
   0   0  20   65.29    5.76
   0   0  22    0.13    3.81
   0   0  24    2.43    4.12
   0   1   4 3546.04   21.91
   0   1   5  330.55    6.03
   0   1   6 1652.94   11.97
   0   1   7  242.37    4.28
   0   1   8 3222.89   19.57
   0   1   9  818.89    6.28
   0   1  10 1560.21   12.93
   0   1  11  262.74    5.35
   0   1  12  425.96    8.86
   0   1  13   41.01    4.34
   0   1  14    6.92    2.83
   0   1  15   85.85    4.32
   0   1  16   46.51    3.70
   0   1  17   50.75    3.21
   0   1  18   63.31    3.65
   0   1  19   10.62    3.31
   0   1  20  105.24    7.14
   0   1  21    0.28    2.29
   0   1  22   86.10    6.21
   0   1  23    0.13    2.27
   0   1  24    4.70    3.27
   0   2   3 1111.93   22.76
   0   2   4 1281.36   15.58
   0   2   7  731.94    8.79
   0   2   8  274.29    5.79
   0   2   9  107.95    3.22
   0   2  10  888.20    7.79
   0   2  11   16.48    1.36
   0   2  12  535.71   24.66
   0   2  13   69.59    5.58
   0   2  14  318.37   13.23
   0   2  15   60.60    3.26
   0   2  16  261.54    8.73
   0   2  17  176.76   15.66
   0   2  18   71.85    5.58
   0   2  19  123.46    6.50
   0   2  20    4.09    2.83
   0   2  21   86.88    9.05
   0   2  22   22.92    3.36
   0   2  23   58.96    6.67
   0   2  24    8.06    4.85
   0   3   3  370.46   11.09
   0   3   4   84.65    3.12
   0   3   5 1993.13   21.99
   0   3   6  980.90   24.96
   0   3   7  738.78    7.98
   0   3   8  568.55    7.19
   0   3   9  374.99    7.36
   0   3  10    1.04    0.98
   0   3  11  558.52   13.24
   0   3  12   33.95   11.08
   0   3  13  294.83   11.04
   0   3  14   43.72    6.16
   0   3  15  227.49    8.41
   0   3  16  314.90   17.23
   0   3  17   44.62    4.31
   0   3  18  364.86   11.60
   0   3  19    8.65    3.35
   0   3  20  103.11    7.84
   0   3  21    1.46    5.83
   0   3  22   12.27    3.56
   0   3  23    8.17    5.63
   0   3  24    0.04    4.02
   0   4   2   26.72    9.36
   0   4   3 1766.87   41.73
   0   4   4   70.53    6.36
   0   4   5  657.52   12.22
   0   4   7  361.91    7.64
   0   4   8  337.95    5.46
   0   4   9    6.88    1.26
   0   4  10  504.33    9.24
   0   4  11    1.32    2.67
   0   4  12  144.64   10.68
   0   4  13   11.79    2.99
   0   4  14    0.73    2.67
   0   4  15   13.28    3.66
   0   4  16    0.53    2.07
   0   4  17  112.05   11.90
   0   4  18   61.99    6.41
   0   4  19   53.76    5.03
   0   4  20  158.23    9.57
   0   4  21   57.51    6.85
   0   4  22  159.22   10.01
   0   4  23   59.98   10.97
   0   4  24  123.90   15.26
   0   5   1  134.22    3.23
   0   5   2   61.94    3.58
   0   5   3  108.63    4.61
   0   5   4  155.47    4.28
   0   5   5  876.45   16.78
   0   5   6  288.36    7.97
   0   5   7  313.66    5.73
   0   5   8   68.41    3.97
   0   5   9  176.73    5.04
   0   5  10   22.86    5.71
   0   5  11   45.24    5.52
   0   5  12  269.82   13.77
   0   5  13    0.78    2.81
   0   5  14  245.72   16.76
   0   5  15    6.02    1.89
   0   5  16  397.28   13.03
   0   5  17    1.39    2.58
   0   5  18  319.20   12.51
   0   5  19   36.91    4.60
   0   5  20   99.64    6.98
   0   5  21    0.61    2.45
   0   5  22    2.40    3.96
   0   5  23    3.20    4.05
   0   5  24   22.60    7.79
   0   6   1   39.74    3.56
   0   6   3  991.52   27.53
   0   6   4  367.62   19.67
   0   6   5  369.31   18.67
   0   6   6  630.45   11.22
   0   6   7  194.88    6.67
   0   6   8  150.34    6.85
   0   6   9   52.95    2.79
   0   6  10   32.64    3.37
   0   6  11    0.18    4.10
   0   6  12  136.67   12.25
   0   6  13   59.59    9.01
   0   6  14    8.55    2.53
   0   6  15   99.08    6.90
   0   6  16    0.04    2.17
   0   6  17   70.54    5.71
   0   6  18   62.61    6.04
   0   6  19   26.15    4.67
   0   6  20  146.98    9.59
   0   6  21    8.07    3.22
   0   6  22  146.18    9.79
   0   6  23   13.88    6.70
   0   7   2  195.93   17.08
   0   7   4  421.00   15.07
   0   7   5 1534.75   32.79
   0   7   6  990.72   21.06
   0   7   7 2467.64   32.42
   0   7   8  131.26    7.37
   0   7   9 1334.32   32.96
   0   7  10   13.57    3.11
   0   7  11  332.43   15.83
   0   7  12    3.83    3.92
   0   7  13  114.66   20.20
   0   7  14    2.07    3.90
   0   7  15   89.11    5.94
   0   7  16  315.84   12.23
   0   7  17    0.41    2.73
   0   7  18  321.59   13.72
   0   7  19   22.43    6.39
   0   7  20  127.98    8.03
   0   7  21    7.85    2.65
   0   7  22   13.68    5.77
   0   7  23   28.73    8.06
   0   8   0 2795.78   46.58
   0   8   1 1274.14   27.84
   0   8   2 1303.21   29.10
   0   8   3  779.55   46.72
   0   8   4  255.49   11.31
   0   8   5  117.43    8.47
   0   8   6   75.38    4.68
   0   8   7  153.57    8.69
   0   8   8  370.15   18.23
   0   8   9    6.49    3.74
   0   8  10  497.14   17.96
   0   8  11  247.30   14.22
   0   8  12  209.23   14.01
   0   8  13  270.79   10.24
   0   8  14  141.75    7.56
   0   8  15   61.61    5.46
   0   8  16  361.97   19.46
   0   8  17  167.11   10.09
   0   8  18   43.67    5.44
   0   8  19  187.00   10.23
   0   8  20   16.82    4.20
   0   8  21   71.00    7.23
   0   8  22   27.50    7.25
   0   8  23   16.07    6.24
   0   9   1   37.09    2.76
   0   9   2  824.08   18.18
   0   9   3  417.08   31.93
   0   9   4 1456.21   27.17
   0   9   5  391.93   11.78
   0   9   6 2597.23   49.11
   0   9   7  261.51   16.42
   0   9   8 2627.62   36.54
   0   9   9  828.78   17.00
   0   9  10 1269.44   35.58
   0   9  11  656.61   27.33
   0   9  12  184.89   14.02
   0   9  13   37.35    5.95
   0   9  14   25.03    3.66
   0   9  15   18.85    9.21
   0   9  16   56.65    8.65
   0   9  17    0.89    2.89
   0   9  18   44.75    4.73
   0   9  19    1.90    2.42
   0   9  20   82.02    7.09
   0   9  21   40.01    5.38
   0   9  22   58.83   10.74
   0  10   0 9813.99  138.74
   0  10   2 4077.43   72.49
   0  10   3   59.11    9.01
   0  10   4  846.04   15.04
   0  10   5   28.37    7.73
   0  10   6  203.35   13.25
   0  10   7   19.95    3.59
   0  10   8    9.61    4.03
   0  10   9   11.41    3.13
   0  10  10  570.03   23.67
   0  10  11   30.35    5.42
   0  10  12 1235.92   35.82
   0  10  13   59.97   10.18
   0  10  14  439.52   14.33
   0  10  15    0.07    2.70
   0  10  16  316.36   12.87
   0  10  17    0.12    2.52
   0  10  18  202.29   10.72
   0  10  19    0.74    2.68
   0  10  20   54.47    5.69
   0  10  21    1.10    3.23
   0  10  22    6.09    4.78
   0  11   1    2.67    3.94
   0  11   2  690.87   23.31
   0  11   3   23.38    4.54
   0  11   4 1328.16   31.30
   0  11   5   31.35    4.86
   0  11   6 1444.96   38.48
   0  11   7    6.40    4.27
   0  11   8 1699.45   41.49
   0  11   9   59.72    4.82
   0  11  10 1166.86   25.34
   0  11  11  103.05   11.16
   0  11  12  294.04   18.66
   0  11  13   28.81    6.31
   0  11  14   26.77    6.37
   0  11  15   49.91    5.24
   0  11  16   49.30    5.14
   0  11  17  179.71   13.67
   0  11  18   46.69    7.04
   0  11  19   55.35    6.20
   0  11  20   75.09    7.41
   0  11  21   10.11    6.20
   0  11  22   69.54   11.02
   0  12   0 1931.93   41.48
   0  12   1  664.86   14.20
   0  12   2  555.36   18.99
   0  12   3  186.91   10.96
   0  12   4  167.05   14.08
   0  12   5  282.51   15.78
   0  12   6    3.55    2.77
   0  12   7  383.40   19.23
   0  12   8   53.46    7.28
   0  12   9  141.84    9.09
   0  12  10  102.42   14.08
   0  12  11   61.71    8.27
   0  12  12  246.42   17.42
   0  12  13    4.38    4.88
   0  12  14  199.41   15.60
   0  12  15   16.06    3.45
   0  12  16  186.82   14.73
   0  12  17   27.20    5.34
   0  12  18   26.44    3.91
   0  12  19   77.98    7.29
   0  12  20    1.06    4.02
   0  12  21  139.97   15.56
   0  13   1   27.15    6.17
   0  13   2   31.09    7.17
   0  13   3   28.84    4.85
   0  13   4  267.89   15.17
   0  13   5   73.06    7.84
   0  13   6  240.09   14.65
   0  13   7  119.25   10.29
   0  13   8  126.90   10.30
   0  13   9   65.72    6.95
   0  13  10   13.25    3.56
   0  13  11  189.47   15.45
   0  13  12   12.72    5.73
   0  13  13  220.89   17.53
   0  13  14   60.11    8.16
   0  13  15  214.39   17.83
   0  13  16  109.40    8.40
   0  13  17  101.73    8.80
   0  13  18  156.79   10.03
   0  13  19   50.16   12.97
   0  13  20   79.03    7.14
   0  14   0   14.15    3.71
   0  14   1  117.66   12.47
   0  14   2   75.99    9.49
   0  14   3   60.45    6.42
   0  14   4   50.66    7.54
   0  14   5    6.30    4.16
   0  14   6  231.23   13.31
   0  14   7  120.42   11.14
   0  14   8  161.87   12.11
   0  14   9   43.92    6.84
   0  14  10   57.53    7.06
   0  14  11  202.01   11.08
   0  14  12   49.37    6.81
   0  14  13  142.09   12.99
   0  14  14    0.92    4.33
   0  14  15    1.55    4.24
   0  14  16    3.66    5.06
   0  14  17   32.70    4.71
   0  14  18   30.79    4.69
   0  14  19   18.28    5.80
   0  14  20   86.74   13.90
   0  15   1    0.48    2.71
   0  15   2    6.40    2.65
   0  15   3   53.52    7.01
   0  15   4    4.73    4.92
   0  15   5  127.21   11.61
   0  15   6   25.35    5.16
   0  15   7  365.75   19.77
   0  15   8   23.21    7.89
   0  15   9  303.48   19.44
   0  15  10   68.01    8.71
   0  15  11   25.00    4.85
   0  15  12  165.53   15.08
   0  15  13    6.49    5.33
   0  15  14  255.64   18.81
   0  15  15   59.36    9.06
   0  15  16  143.83   15.33
   0  15  17   13.33    4.14
   0  15  18   82.54    7.98
   0  15  19   23.01    4.58
   0  16   0    7.63    3.69
   0  16   1  716.31   18.63
   0  16   2   11.88    4.21
   0  16   3  677.24   27.31
   0  16   4   94.71    9.09
   0  16   5  150.68   13.88
   0  16   6  143.79   13.39
   0  16   7   37.76    8.55
   0  16   8   94.59   10.49
   0  16   9    7.52    4.08
   0  16  10    7.21    2.80
   0  16  11   52.41    8.56
   0  16  12    1.84    2.75
   0  16  13  123.07   13.35
   0  16  14    9.82    5.48
   0  16  15  116.58   14.17
   0  16  16    3.07    4.43
   0  16  17   85.76    7.52
   0  16  18   52.05    6.64
   0  17   1   11.72    3.56
   0  17   2   20.43    4.16
   0  17   3  407.45   14.91
   0  17   4  172.57   13.29
   0  17   5  936.02   33.71
   0  17   6  480.21   21.15
   0  17   7  968.15   34.82
   0  17   8  248.96   19.06
   0  17   9  505.68   24.64
   0  17  10  104.02    8.06
   0  17  11  210.64   12.50
   0  17  12    8.74    3.82
   0  17  13  121.77   13.16
   0  17  14   28.61    7.18
   0  17  15   24.25    6.39
   0  17  16   31.10    7.54
   0  17  17    0.33    4.97
   0  18   0  416.56   21.92
   0  18   1  903.87   39.71
   0  18   2  488.05   26.17
   0  18   3  619.29   17.84
   0  18   4  308.83   12.92
   0  18   5  280.06   17.87
   0  18   6   29.25    6.66
   0  18   7    7.37    5.34
   0  18   8    8.64    5.15
   0  18   9  114.23   12.33
   0  18  10   52.30    9.11
   0  18  11  178.62   12.02
   0  18  12   94.69    8.27
   0  18  13  226.44   19.01
   0  18  14  204.99   18.46
   0  18  15  236.73   20.33
   0  18  16   87.64   13.50
   0  18  17  135.96   16.74
   0  19   1   22.81    4.86
   0  19   2  216.20   10.26
   0  19   3  111.88    7.94
   0  19   4  421.28   28.76
   0  19   5  203.79   17.19
   0  19   6  476.34   25.90
   0  19   7  284.14   19.13
   0  19   8  314.48   20.60
   0  19   9  227.38   17.37
   0  19  10  290.52   14.40
   0  19  11  148.94   10.52
   0  19  12  122.24   10.23
   0  19  13   20.40    7.59
   0  19  14   32.30    7.57
   0  19  15   12.53    5.20
   0  20   0  929.12   34.58
   0  20   1  109.88    8.34
   0  20   2  731.45   22.33
   0  20   3   27.01    6.90
   0  20   4  359.90   14.55
   0  20   5    1.81    3.35
   0  20   6   41.31    7.77
   0  20   7    0.90    3.55
   0  20   8    1.08    4.66
   0  20   9   38.93    8.00
   0  20  10  100.25   12.38
   0  20  11   60.39    7.49
   0  20  12  214.31   13.52
   0  20  13  102.18   13.73
   0  20  14  221.88   20.90
   0  21   1    0.09    2.72
   0  21   2  118.12    8.74
   0  21   3    6.66    8.20
   0  21   4  337.55   14.94
   0  21   5    7.68    3.86
   0  21   6  353.11   17.70
   0  21   7    4.64    5.84
   0  21   8  252.31   20.83
   0  21   9    0.01    4.50
   0  21  10  276.22   20.88
   0  21  11   20.82    5.29
   0  21  12   64.07    7.82
   0  21  13  121.91   15.13
   0  22   0   77.11    8.58
   0  22   1   10.10    2.72
   0  22   2  106.84    9.32
   0  22   3   20.64    7.38
   0  22   4  104.44    8.95
   0  22   5   37.89    5.27
   0  22   6   13.45    3.92
   0  22   7   31.04    5.57
   0  22   8    5.01    5.54
   0  22   9  112.76   13.36
   0  22  10   27.84    5.11
   0  22  11   57.88    7.45
   0  23   1    4.88    2.78
   0  23   2    4.54    3.22
   0  23   3    5.43    3.49
   0  23   4    0.01    3.31
   0  23   5    3.93    3.07
   0  23   6   10.33    4.02
   0  23   7    3.81    3.60
   0  23   8    0.11    4.81
   0  23   9    3.40    4.44
   0  24   0   80.52   11.20
   0  24   1   58.64    7.50
   0  24   2   47.47    6.74
   0  24   3   42.79    6.24
   0  24   4   25.09    4.87
   0  24   5    0.49    5.90
   0  24   6   64.09    7.88
   1   0   5 1566.20   14.01
   1   0   7 4402.89   35.51
   1   0   9 5765.19   51.97
   1   0  11 1749.81   23.01
   1   0  13  864.53   26.73
   1   0  15   51.28   13.41
   1   0  17   13.47    9.27
   1   0  19   10.48    2.85
   1   0  21  199.67   17.97
   1   0  23  166.75   16.94
   1   1   3 3495.70   25.94
   1   1   4  177.59    3.97
   1   1   5 1376.96   13.43
   1   1   7  734.20    6.23
   1   1   8    4.35    1.04
   1   1   9   12.96    1.65
   1   1  10   91.54    2.74
   1   1  11  216.90    5.78
   1   1  12   21.96    2.64
   1   1  13  920.42   20.45
   1   1  14  103.31    5.11
   1   1  15 1188.76   17.11
   1   1  16  265.42    7.66
   1   1  17 1079.24   16.82
   1   1  18  156.82    6.03
   1   1  19  264.00   14.19
   1   1  20   46.83    4.02
   1   1  21   32.33    5.15
   1   1  22    7.97    2.51
   1   1  23    2.85    2.76
   1   1  24    0.04    2.64
   1   2   4  684.33   11.88
   1   2   5 1267.69   18.18
   1   2   6 2023.11   15.80
   1   2   7 1282.53   12.03
   1   2   8 1073.45   10.46
   1   2   9 2153.30   15.90
   1   2  10  524.09    7.96
   1   2  11 1073.27   21.35
   1   2  12  184.00    8.45
   1   2  13  501.25   14.57
   1   2  14  107.34    4.46
   1   2  15   17.57    3.65
   1   2  16   76.08    4.64
   1   2  17    3.89    3.76
   1   2  18    6.70    2.26
   1   2  19   96.11    4.91
   1   2  20   12.36    3.42
   1   2  21  199.78    9.57
   1   2  22   24.79    4.29
   1   2  23   54.17    6.09
   1   2  24   26.26    7.70
   1   3   2  335.00    6.28
   1   3   3  129.10    7.18
   1   3   5  549.64    9.14
   1   3   7  578.85    9.35
   1   3   9   85.82    2.30
   1   3  10  233.99    6.53
   1   3  11    3.25    1.68
   1   3  12   46.47    4.18
   1   3  13   39.26    3.81
   1   3  14   29.83    2.65
   1   3  15  108.01    8.96
   1   3  16   56.41    3.85
   1   3  17  135.44    7.69
   1   3  18   98.50    8.05
   1   3  19   14.15    2.85
   1   3  20   57.58    5.59
   1   3  21   16.63    3.52
   1   3  22    6.87    2.35
   1   3  23   17.99    4.35
   1   3  24   25.38    7.02
   1   4   3   86.82    6.66
   1   4   4   73.11    6.72
   1   4   6   80.08    4.16
   1   4   7   28.47    1.70
   1   4   8   39.87    1.82
   1   4   9   34.65    2.84
   1   4  10  123.90    6.10
   1   4  11    0.30    2.35
   1   4  12   40.84    5.51
   1   4  13    0.19    3.18
   1   4  14    6.29    2.29
   1   4  15    1.20    3.47
   1   4  16    4.17    2.58
   1   4  17   13.95    3.02
   1   4  18    0.61    2.57
   1   4  19   21.08    4.76
   1   4  20    2.25    2.73
   1   4  21    6.41    2.62
   1   4  22    0.07    2.67
   1   4  23    0.06    2.97
   1   5   3  157.83   12.12
   1   5   4  305.90    6.91
   1   5   5   52.11    7.24
   1   5   6   58.83    1.60
   1   5   7  102.02    4.14
   1   5   8   75.10    5.11
   1   5   9  523.61   15.36
   1   5  10  133.10   13.08
   1   5  11  121.48   10.92
   1   5  12    0.58    2.42
   1   5  13   10.05    6.74
   1   5  14    4.46    2.15
   1   5  15   21.07    3.25
   1   5  16   45.51    4.86
   1   5  17    0.15    3.01
   1   5  18   60.69    5.13
   1   5  19    0.84    3.03
   1   5  20    1.85    2.67
   1   5  21   31.45    4.19
   1   5  22    0.42    2.32
   1   5  23   50.09    5.67
   1   6   1 1822.37   31.93
   1   6   2   53.79    3.58
   1   6   4  233.76   11.03
   1   6   5    4.63    6.12
   1   6   6 1058.04   27.96
   1   6   7    5.53    2.51
   1   6   8 1569.55   32.94
   1   6   9   68.64    8.27
   1   6  10  380.82   18.88
   1   6  11  229.58   13.40
   1   6  12   71.85    7.66
   1   6  13    2.60    2.08
   1   6  14   46.70    5.66
   1   6  15    4.07    2.45
   1   6  16    0.60    2.76
   1   6  17    2.56    4.74
   1   6  18   47.08    6.70
   1   6  19   18.42    3.35
   1   6  20   58.58    5.78
   1   6  21   17.11    3.86
   1   6  22   18.87    4.30
   1   6  23    0.02    3.25
   1   7   1 1458.67   25.08
   1   7   2  982.97   19.28
   1   7   3  687.23   19.60
   1   7   4  996.49   19.97
   1   7   5  392.19   11.20
   1   7   6 1005.26   25.05
   1   7   7  263.44   12.10
   1   7   8   46.56    3.66
   1   7   9  105.20    6.70
   1   7  10   89.06    9.01
   1   7  11    3.15    3.52
   1   7  12  250.40   16.02
   1   7  13    6.11    6.35
   1   7  14  183.09    9.09
   1   7  15  278.34   10.61
   1   7  16  484.65   16.08
   1   7  17  117.69    8.50
   1   7  18  215.57   11.86
   1   7  19   49.55    5.57
   1   7  20   82.78   16.27
   1   7  21    0.14    2.80
   1   7  22   48.87    9.71
   1   7  23   23.62    7.30
   1   8   3  605.72   17.79
   1   8   4  671.48   21.89
   1   8   5  936.97   30.09
   1   8   6 1262.28   26.67
   1   8   7  997.78   28.93
   1   8   8 1311.70   30.53
   1   8   9 1192.61   24.03
   1   8  10  694.97   21.54
   1   8  11  574.04   22.57
   1   8  12  266.17   10.62
   1   8  13  167.65   12.57
   1   8  14   44.33    5.71
   1   8  15   31.76    5.03
   1   8  16   20.90    7.29
   1   8  17   30.96    4.32
   1   8  18   29.99    5.88
   1   8  19  107.70    8.45
   1   8  20   25.67    4.93
   1   8  21  113.84    7.95
   1   8  22   56.16    6.25
   1   9   1 3215.94   54.88
   1   9   2  480.25   14.30
   1   9   3 1500.92   32.37
   1   9   4  315.99   17.82
   1   9   5 1221.66   34.01
   1   9   6   97.95    7.65
   1   9   7  429.89   16.70
   1   9   8    1.88    2.27
   1   9   9   13.10    3.50
   1   9  10   32.74    6.17
   1   9  11  302.28   17.50
   1   9  12   95.01    9.38
   1   9  13  640.13   33.04
   1   9  14   93.68    7.65
   1   9  15 1185.33   26.61
   1   9  16  184.64    9.87
   1   9  17  551.98   17.28
   1   9  18  118.30    8.31
   1   9  19  239.81   12.72
   1   9  20  103.96    7.81
   1   9  21   53.68    6.86
   1   9  22   28.62    9.28
   1  10   1    1.47    3.96
   1  10   2   21.84    3.01
   1  10   3  238.12   12.54
   1  10   4   62.93    6.91
   1  10   5 1478.45   34.91
   1  10   6   31.19    5.84
   1  10   7 1933.10   43.43
   1  10   8  137.21    9.64
   1  10   9 2539.64   38.42
   1  10  10   54.64    6.10
   1  10  11 1549.46   39.96
   1  10  12    1.19    4.55
   1  10  13  446.21   13.99
   1  10  14    1.21    3.45
   1  10  15   11.43    3.52
   1  10  16    5.47    3.39
   1  10  17    4.08    2.84
   1  10  18   20.82    4.16
   1  10  19   62.00    7.86
   1  10  20   18.76    4.38
   1  10  21  140.06   15.77
   1  10  22   13.33    6.76
   1  11   1 2817.87   50.03
   1  11   2  449.55   18.85
   1  11   3 1476.45   36.62
   1  11   4   70.19    7.29
   1  11   5  939.72   28.01
   1  11   6   91.99    9.59
   1  11   7  459.69   21.33
   1  11   8   36.14    9.08
   1  11   9   11.66    6.33
   1  11  10    3.34    3.25
   1  11  11  188.40   14.09
   1  11  12  106.82   12.76
   1  11  13  485.43   23.93
   1  11  14   85.04    8.19
   1  11  15  707.01   19.35
   1  11  16    0.65    6.55
   1  11  17  599.90   19.86
   1  11  18   11.39    3.80
   1  11  19  262.94   12.92
   1  11  20   25.36    6.07
   1  11  21   46.02    5.83
   1  12   1  158.23   15.69
   1  12   2  922.03   28.03
   1  12   3    2.63    4.01
   1  12   4  643.70   22.92
   1  12   5  239.73   14.31
   1  12   6  596.40   23.74
   1  12   7  523.77   23.04
   1  12   8  212.55   13.45
   1  12   9  623.16   35.55
   1  12  10   94.89    7.22
   1  12  11  149.16    8.98
   1  12  12   52.60    7.00
   1  12  13  115.88   12.95
   1  12  14    7.13    5.05
   1  12  15   37.59    5.19
   1  12  16   19.09    4.96
   1  12  17    4.30    3.57
   1  12  18    4.30    2.83
   1  12  19   69.05    6.68
   1  12  20    0.66    3.29
   1  12  21   84.76    8.80
   1  13   1   10.58    5.76
   1  13   2  141.46   10.57
   1  13   3  129.53    8.71
   1  13   4   11.28    5.42
   1  13   5  104.32    9.48
   1  13   6    9.11    3.54
   1  13   7  119.10   10.76
   1  13   8   17.61    3.62
   1  13   9  122.23   12.56
   1  13  10   49.12    6.90
   1  13  11   31.32    5.79
   1  13  12   19.90    5.44
   1  13  13   12.24    3.93
   1  13  14    0.00    4.04
   1  13  15   25.41    7.64
   1  13  16   16.40    3.27
   1  13  17   37.42    5.01
   1  13  18    8.52    4.58
   1  13  19    7.17    5.60
   1  13  20   23.32    4.64
   1  14   1  578.00   15.18
   1  14   2  340.86   16.73
   1  14   3  312.70   16.31
   1  14   4  205.61   13.94
   1  14   5   66.95    8.98
   1  14   6   96.54   10.47
   1  14   7   37.44    4.65
   1  14   8    5.51    3.13
   1  14   9   30.27    6.84
   1  14  10   56.82    6.63
   1  14  11    1.05    7.69
   1  14  12    0.00    5.31
   1  14  13    4.49    4.57
   1  14  14    0.00    3.68
   1  14  15    3.59    3.77
   1  14  16    7.48    6.29
   1  14  17    1.43    6.71
   1  14  18    0.35    3.04
   1  14  19   11.17    3.79
   1  15   1   97.56    6.33
   1  15   2  272.42   11.14
   1  15   3   27.92    6.07
   1  15   4  276.18   14.36
   1  15   5   30.15    6.65
   1  15   6   44.04    8.36
   1  15   7  174.97   13.71
   1  15   8    1.32    3.49
   1  15   9  180.58   14.22
   1  15  10    0.60    7.64
   1  15  11   63.20    9.29
   1  15  12   21.68    3.97
   1  15  13    7.97    4.73
   1  15  14  114.91   11.88
   1  15  15    0.28    3.79
   1  15  16  103.12    8.71
   1  15  17    3.77    5.54
   1  15  18   41.36    6.17
   1  15  19    9.83    3.18
   1  16   1  293.74   17.74
   1  16   2   13.94    2.96
   1  16   3  337.13   17.74
   1  16   4  321.76   17.86
   1  16   5  184.74   13.52
   1  16   6 1136.00   38.99
   1  16   7   39.76    7.77
   1  16   8 1286.50   40.71
   1  16   9   79.53   10.48
   1  16  10  652.86   35.43
   1  16  11    7.44    3.44
   1  16  12  194.25   12.78
   1  16  13   12.81    5.70
   1  16  14   96.07   11.69
   1  16  15    3.13    4.12
   1  16  16    5.99    4.12
   1  16  17   12.09    4.15
   1  16  18   12.63    4.02
   1  17   1   13.17    5.44
   1  17   2  891.14   22.01
   1  17   3   48.36    5.69
   1  17   4  944.11   32.87
   1  17   5   43.43    7.41
   1  17   6  221.47   16.62
   1  17   7   76.53   11.24
   1  17   8    0.74    4.01
   1  17   9   31.01    6.85
   1  17  10   46.19    5.33
   1  17  11   11.48    4.03
   1  17  12  249.14   13.87
   1  17  13   14.48    6.25
   1  17  14  313.80   21.77
   1  17  15   73.33   11.19
   1  17  16  298.46   22.87
   1  17  17   23.93    5.43
   1  18   1    3.02    2.51
   1  18   2   33.30    5.29
   1  18   3   88.55    7.46
   1  18   4  203.53   14.77
   1  18   5  273.05   18.46
   1  18   6  491.02   24.22
   1  18   7  281.48   19.30
   1  18   8  534.62   28.74
   1  18   9  241.86   18.95
   1  18  10  298.81   21.13
   1  18  11  248.49   18.35
   1  18  12  211.07   11.93
   1  18  13  112.85   14.07
   1  18  14  110.86   14.16
   1  18  15   25.60    7.72
   1  18  16    0.02    4.33
   1  19   1  933.47   23.44
   1  19   2  200.22   10.22
   1  19   3  936.37   25.65
   1  19   4  137.10    9.99
   1  19   5  206.62   16.81
   1  19   6  137.49   14.20
   1  19   7   44.00    7.42
   1  19   8    0.30    3.96
   1  19   9    9.18    5.41
   1  19  10   41.41    8.57
   1  19  11  120.61    9.32
   1  19  12   86.99   14.67
   1  19  13  249.85   24.95
   1  19  14  140.27   16.90
   1  19  15  350.68   24.86
   1  20   1    6.43    3.04
   1  20   2   30.13    4.57
   1  20   3  303.96   18.33
   1  20   4   17.52    4.72
   1  20   5  552.55   18.84
   1  20   6   48.45   10.61
   1  20   7  471.23   24.90
   1  20   8  152.91   15.04
   1  20   9  471.30   28.20
   1  20  10   86.34   11.96
   1  20  11  300.57   16.20
   1  20  12   55.46    7.53
   1  20  13  199.39   12.85
   1  20  14    4.75    5.23
   1  21   1  238.32   13.00
   1  21   2    2.09    2.96
   1  21   3  313.40   18.81
   1  21   4   28.31   11.12
   1  21   5   93.21    7.69
   1  21   6   28.16    4.94
   1  21   7   22.12    7.75
   1  21   8   24.03    7.82
   1  21   9    0.05    4.05
   1  21  10    7.60    5.71
   1  21  11   78.57    8.69
   1  21  12    8.34    5.11
   1  22   1   30.92    4.93
   1  22   2  204.64   11.95
   1  22   3   10.37    3.68
   1  22   4  142.93   11.21
   1  22   5   30.19    6.68
   1  22   6  137.51   10.44
   1  22   7   42.60    6.40
   1  22   8    3.96    4.96
   1  22   9  117.24   13.83
   1  22  10    3.57    4.45
   1  22  11   56.81    7.33
   1  23   1    1.82    2.75
   1  23   2    6.19    3.13
   1  23   3   15.46    5.60
   1  23   4   37.41    6.11
   1  23   5    4.42    3.36
   1  23   6   27.86    5.03
   1  23   7   17.77    4.60
   1  23   8    9.94    8.72
   1  23   9   11.48    5.08
   1  24   1  130.62   12.16
   1  24   2  107.48   10.36
   1  24   3  186.99   11.74
   1  24   4   46.38    8.10
   1  24   5  105.60   10.15
   1  24   6    3.84    3.07
   2   0   2  338.10    9.98
   2   0   6  412.03    9.98
   2   0   8  246.97    7.93
   2   0  10   13.60    1.78
   2   0  12  484.08   18.08
   2   0  14  967.96   25.15
   2   0  16 1130.51   24.53
   2   0  18  641.79   19.44
   2   0  20  261.39   12.73
   2   0  22  201.46   10.56
   2   1   2 1228.52   18.52
   2   1   3  989.47    7.65
   2   1   6  651.42    6.69
   2   1   7  240.45    8.70
   2   1   8 1063.36   22.99
   2   1   9  391.61    5.07
   2   1  10  767.51   21.94
   2   1  11   26.13    3.89
   2   1  12 1542.59   18.44
   2   1  13   19.74    2.19
   2   1  14  400.18   12.21
   2   1  15   13.77    2.69
   2   1  16  116.96    6.61
   2   1  17   14.86    2.28
   2   1  18   28.68    3.42
   2   1  19    6.37    2.03
   2   1  20   67.20    4.43
   2   1  21   19.37    2.56
   2   1  22  171.81    9.17
   2   1  23   53.06    6.68
   2   2   3  770.96   14.19
   2   2   4 1097.69   12.74
   2   2   5    0.18    1.45
   2   2   6  760.47    8.52
   2   2   7  183.00    5.75
   2   2   8  612.07   10.50
   2   2   9  405.98    6.67
   2   2  10  445.07    8.31
   2   2  11  494.73   10.39
   2   2  12    1.55    3.26
   2   2  13  296.67    9.01
   2   2  14  110.04    5.83
   2   2  15  193.54    7.01
   2   2  16  214.12    6.39
   2   2  17  227.80    7.48
   2   2  18  202.42   11.50
   2   2  19  149.10    6.69
   2   2  20   61.64   10.02
   2   2  21   20.58    4.30
   2   2  22   43.95    5.59
   2   2  23    1.83    2.74
   2   3   2 2291.40   20.96
   2   3   4  573.10    5.87
   2   3   5 3757.94   27.52
   2   3   6  188.39    5.42
   2   3   7 1313.92   28.51
   2   3   8   48.07    4.02
   2   3   9  601.24   16.15
   2   3  10    4.38    2.02
   2   3  11  218.71    7.10
   2   3  12  398.00    9.91
   2   3  13   45.34    2.77
   2   3  14  570.89   12.68
   2   3  15   10.48    2.00
   2   3  16  237.86    9.00
   2   3  17   71.41    4.83
   2   3  18   20.03    3.94
   2   3  19   74.15    6.24
   2   3  20   14.66    3.36
   2   3  21   83.28    7.61
   2   3  22    6.35    4.80
   2   3  23   47.64    6.13
   2   4   3  379.84    8.07
   2   4   4  106.61    9.38
   2   4   5   57.67    5.73
   2   4   6 1651.23   17.11
   2   4   7  148.85   14.68
   2   4   8 2886.47   31.05
   2   4   9  535.79   13.38
   2   4  10 1402.16   24.81
   2   4  11  205.22    6.48
   2   4  12  235.24    7.88
   2   4  13   47.31    4.51
   2   4  14   65.04    6.50
   2   4  15   42.98    4.73
   2   4  16    0.01    2.28
   2   4  17   40.23    4.02
   2   4  18   15.14    2.89
   2   4  19    6.39    3.25
   2   4  20    0.10    4.75
   2   4  21    2.32    2.80
   2   4  22    4.24    2.58
   2   4  23    0.02    2.82
   2   5   2 1672.51   32.55
   2   5   4 1749.27   68.37
   2   5   5  307.51   17.39
   2   5   6 1444.02   17.00
   2   5   7   77.38    3.19
   2   5   8  379.73   14.48
   2   5   9   61.27    4.36
   2   5  10   17.13    3.59
   2   5  11   24.76    4.17
   2   5  12  106.03    6.89
   2   5  13    1.20    2.02
   2   5  14  228.65   10.42
   2   5  15   32.74    4.23
   2   5  16  205.45    9.38
   2   5  17   34.12    4.09
   2   5  18  179.08   10.24
   2   5  19    0.50    2.82
   2   5  20   26.01    4.51
   2   5  21    6.53    3.72
   2   5  22    2.78    2.52
   2   5  23    0.05    3.73
   2   6   3  523.24   25.51
   2   6   4  209.17   10.66
   2   6   5  288.39    8.75
   2   6   6  494.63   10.36
   2   6   7    8.66    2.70
   2   6   8 1159.01   17.48
   2   6   9    3.58    2.94
   2   6  10 1017.94   19.54
   2   6  11   23.43    2.54
   2   6  12  196.70    9.14
   2   6  13   61.64    5.33
   2   6  14   28.47    4.83
   2   6  15  161.52    8.71
   2   6  16    6.70    4.81
   2   6  17  209.79   10.81
   2   6  18   31.45    4.72
   2   6  19  111.22   10.28
   2   6  20   28.88    4.28
   2   6  21   19.46    4.14
   2   6  22    2.75    2.86
   2   6  23    0.40    3.53
   2   7   2 1412.11   23.62
   2   7   4  247.80   17.85
   2   7   5 1088.73   25.43
   2   7   6  140.46   10.99
   2   7   7 1658.20   24.82
   2   7   8   22.82    2.02
   2   7   9  474.98   10.94
   2   7  10  182.79    8.44
   2   7  11   79.85   10.23
   2   7  12  257.42    8.84
   2   7  13   97.89    5.80
   2   7  14  338.32   12.11
   2   7  15   87.58   12.82
   2   7  16  166.65    8.93
   2   7  17   68.20    6.03
   2   7  18   71.21    6.46
   2   7  19  123.06    8.80
   2   7  20    0.31    2.77
   2   7  21   47.98    5.62
   2   7  22    9.91    2.76
   2   8   2  708.44   19.82
   2   8   3  640.54   19.54
   2   8   4 1237.57   32.33
   2   8   5  506.19   18.66
   2   8   6 1142.44   29.38
   2   8   7   44.56    7.20
   2   8   8  498.98   13.12
   2   8   9   58.82    3.85
   2   8  10  141.63   11.20
   2   8  11  173.83    8.64
   2   8  12    1.85    2.33
   2   8  13  405.66   16.03
   2   8  14  112.72    7.51
   2   8  15  564.72   15.83
   2   8  16  232.55   11.37
   2   8  17  247.91   11.41
   2   8  18  186.71   16.99
   2   8  19  101.38    9.79
   2   8  20   75.15    7.66
   2   8  21   54.63    9.52
   2   8  22   78.56    7.46
   2   9   2   82.19    9.41
   2   9   3   92.17    4.82
   2   9   4   97.47    6.97
   2   9   5  132.11   14.03
   2   9   6   94.52   11.03
   2   9   7  524.23   19.78
   2   9   8  613.04   13.99
   2   9   9  472.62   15.77
   2   9  10  621.15   18.48
   2   9  11  100.95   10.38
   2   9  12 1123.36   23.68
   2   9  13   33.19    4.33
   2   9  14  532.51   16.25
   2   9  15    0.03    5.18
   2   9  16   57.86    5.41
   2   9  17   32.89    7.56
   2   9  18    4.57    3.04
   2   9  19    0.71    2.38
   2   9  20   26.33    5.19
   2   9  21   18.72    4.21
   2   9  22  111.80    8.58
   2  10   2  435.08   19.37
   2  10   3    0.27    2.47
   2  10   4  288.69   11.38
   2  10   5  167.29   12.44
   2  10   6  217.59   13.42
   2  10   7  403.98   15.50
   2  10   8  200.78   15.96
   2  10   9   51.49    5.64
   2  10  10   21.60    4.68
   2  10  11   10.04    3.54
   2  10  12  306.99   16.14
   2  10  13    4.60    2.97
   2  10  14  722.62   19.38
   2  10  15    5.39    4.14
   2  10  16  578.95   17.51
   2  10  17   32.18    4.92
   2  10  18  485.90   17.28
   2  10  19   19.78    4.62
   2  10  20  227.21   12.28
   2  10  21   26.41    4.98
   2  11   2   63.90    7.24
   2  11   3  779.38   22.36
   2  11   4   74.72    8.50
   2  11   5  676.76   26.19
   2  11   6   27.73    5.64
   2  11   7  119.69    9.35
   2  11   8  544.50   25.41
   2  11   9   23.84    3.34
   2  11  10  458.74   15.03
   2  11  11  275.21   15.26
   2  11  12  562.43   24.77
   2  11  13    3.19    4.54
   2  11  14  123.61   10.25
   2  11  15   90.70   10.12
   2  11  16   49.08    6.79
   2  11  17    1.28    3.08
   2  11  18    0.06    3.23
   2  11  19    2.03    4.54
   2  11  20   59.78    8.19
   2  11  21    3.44    6.75
   2  12   2   87.99    7.72
   2  12   3   57.84    9.03
   2  12   4  327.49   18.49
   2  12   5  271.44   15.65
   2  12   6  298.07   17.45
   2  12   7  283.26   16.32
   2  12   8  301.94   16.81
   2  12   9  186.96   11.31
   2  12  10   71.50    9.27
   2  12  11  571.79   17.24
   2  12  12   10.68    4.94
   2  12  13  380.67   20.66
   2  12  14   26.82    5.46
   2  12  15  127.41    8.08
   2  12  16  170.02   10.14
   2  12  17   40.28    5.44
   2  12  18  131.30   18.32
   2  12  19   33.93    4.34
   2  12  20   39.29    6.20
   2  13   2 1752.49   43.53
   2  13   3 1267.89   38.34
   2  13   4  531.87   21.66
   2  13   5 1285.63   34.18
   2  13   6   66.88    9.62
   2  13   7  616.76   25.55
   2  13   8   11.41    4.06
   2  13   9  148.44   14.17
   2  13  10   65.61    6.64
   2  13  11  156.22   11.03
   2  13  12  142.88    9.52
   2  13  13   27.64    7.46
   2  13  14  251.85   17.79
   2  13  15   40.28    4.25
   2  13  16  149.25   10.62
   2  13  17   49.13    5.44
   2  13  18    9.37    3.08
   2  13  19   29.35    4.88
   2  13  20    1.72    2.88
   2  14   2   94.34    5.43
   2  14   3    1.68    3.63
   2  14   4  164.85   11.37
   2  14   5   35.79    6.46
   2  14   6  528.61   23.85
   2  14   7  205.13   16.83
   2  14   8  687.23   29.70
   2  14   9  602.52   26.86
   2  14  10  821.02   20.99
   2  14  11  257.31   11.87
   2  14  12  319.76   16.09
   2  14  13   23.58    5.37
   2  14  14   78.88   11.23
   2  14  15    9.58    3.12
   2  14  16    6.13    2.78
   2  14  17    2.59    2.68
   2  14  18    0.00    2.72
   2  14  19    0.05    3.00
   2  15   2 1039.64   23.71
   2  15   3   49.21    6.66
   2  15   4 1250.23   37.31
   2  15   5  113.50   12.86
   2  15   6  797.20   31.27
   2  15   7   26.39    6.74
   2  15   8  199.51   15.26
   2  15   9  386.26   21.29
   2  15  10   12.00    4.35
   2  15  11   86.85    7.37
   2  15  12    1.16    3.70
   2  15  13   85.83    9.86
   2  15  14    8.99    3.90
   2  15  15   50.37    9.03
   2  15  16   76.03    7.41
   2  15  17   20.80    4.01
   2  15  18   35.57    6.72
   2  16   2   10.45    2.88
   2  16   3  192.14   23.20
   2  16   4    8.52    5.45
   2  16   5  434.46   22.33
   2  16   6  324.59   18.63
   2  16   7   96.76   11.30
   2  16   8  630.08   28.00
   2  16   9   30.16    7.11
   2  16  10  379.27   16.15
   2  16  11    6.99    4.16
   2  16  12  169.10   11.80
   2  16  13   72.16    8.31
   2  16  14   45.73    9.08
   2  16  15  152.03   15.40
   2  16  16    0.69    4.53
   2  16  17  133.15   14.04
   2  16  18    0.72    3.09
   2  17   2  119.74    7.58
   2  17   3   11.59    2.97
   2  17   4  225.80   16.24
   2  17   5  375.68   21.23
   2  17   6   17.43    6.51
   2  17   7  785.42   31.48
   2  17   8   22.80    6.78
   2  17   9  378.97   23.22
   2  17  10   57.16   10.52
   2  17  11  167.42   10.98
   2  17  12   50.26    9.41
   2  17  13  147.02   11.05
   2  17  14   61.75   10.39
   2  17  15   47.73    9.26
   2  17  16   38.41    8.69
   2  17  17    0.09    2.98
   2  18   2  298.82   12.20
   2  18   3  316.70   13.87
   2  18   4  281.61   12.64
   2  18   5  383.26   21.30
   2  18   6  214.93   16.91
   2  18   7  146.34   14.68
   2  18   8   17.15    6.36
   2  18   9    0.15    4.78
   2  18  10   16.98    6.36
   2  18  11   71.43    8.10
   2  18  12    4.82    2.98
   2  18  13   94.48    8.75
   2  18  14   65.10   10.68
   2  18  15  224.34   18.30
   2  18  16   83.73   13.17
   2  19   2    9.01    3.06
   2  19   3    2.16    2.90
   2  19   4  140.58    9.09
   2  19   5   17.24    5.77
   2  19   6  147.03   16.02
   2  19   7  113.97   12.76
   2  19   8  190.12   15.70
   2  19   9  155.77   15.56
   2  19  10  226.01   19.31
   2  19  11   98.33    9.81
   2  19  12  172.89   24.89
   2  19  13   45.94    6.99
   2  19  14  106.13   13.78
   2  19  15   41.40    9.50
   2  20   2  374.66   14.55
   2  20   3   10.60    3.80
   2  20   4   97.26   14.45
   2  20   5   71.91    7.48
   2  20   6   71.79   10.85
   2  20   7  149.96   13.89
   2  20   8   48.72    9.32
   2  20   9   41.46    8.67
   2  20  10    6.26    5.13
   2  20  11   31.35    5.51
   2  20  12   64.71    8.31
   2  20  13    3.86    7.32
   2  21   2   25.84    5.30
   2  21   3  630.05   20.22
   2  21   4   29.40    5.16
   2  21   5  281.23   14.41
   2  21   6   22.24    4.74
   2  21   7   79.77   12.38
   2  21   8  113.02   15.07
   2  21   9   21.79    6.63
   2  21  10  141.44   15.44
   2  21  11   10.48    7.59
   2  21  12  113.46   10.56
   2  22   2   12.91    3.11
   2  22   3    7.40    5.03
   2  22   4   36.03   10.40
   2  22   5   72.34    7.31
   2  22   6   36.16    5.29
   2  22   7  183.37   11.97
   2  22   8   78.86   10.68
   2  22   9  163.85   17.61
   2  22  10   38.34    8.61
   2  23   2  250.33   13.57
   2  23   3  563.55   25.98
   2  23   4  264.09   13.81
   2  23   5  371.10   25.39
   2  23   6  155.31   16.30
   2  23   7  108.26   13.32
   2  23   8    9.49    5.65
   2  24   2   19.09    5.85
   2  24   3   18.02    7.37
   2  24   4   18.67    6.09
   2  24   5   76.09   11.95
   3   0   3  114.12    4.58
   3   0   5   19.61    2.49
   3   0   9    0.63    2.72
   3   0  11  353.13   10.37
   3   0  13  416.85   11.29
   3   0  15  102.60    9.39
   3   0  17   20.17    3.94
   3   0  19    0.25    3.44
   3   0  21   16.76    4.59
   3   0  23   87.10   11.59
   3   1   3  448.85    7.27
   3   1   4  149.97    4.04
   3   1   5   11.80    1.21
   3   1   6   78.07    2.40
   3   1   7  426.71    6.01
   3   1   8  123.53    3.23
   3   1   9   13.55    1.68
   3   1  10  584.40    9.14
   3   1  11   30.88    2.04
   3   1  12  365.81    8.08
   3   1  13   45.08    2.75
   3   1  14  114.29    5.01
   3   1  15  119.39    5.51
   3   1  16   65.12    4.14
   3   1  17  196.00    6.83
   3   1  18   44.66    3.14
   3   1  19   85.79    5.69
   3   1  20   12.30    3.71
   3   1  21  110.45    6.63
   3   1  22    0.31    2.73
   3   1  23   77.92   10.54
   3   2   3  769.66   45.81
   3   2   4 1145.18   13.39
   3   2   6 1380.95   17.14
   3   2   7  501.05    7.63
   3   2   8  918.61   14.48
   3   2   9   64.83    4.17
   3   2  10  332.82    8.40
   3   2  11  151.33    4.07
   3   2  12    6.30    1.12
   3   2  13  363.02   11.37
   3   2  14  137.04    5.25
   3   2  15  233.43    7.93
   3   2  16  181.48    9.57
   3   2  17  170.72    8.11
   3   2  18  110.33    6.41
   3   2  19   50.80    4.64
   3   2  20   51.72    4.83
   3   2  21    0.71    2.05
   3   2  22   86.23   10.03
   3   2  23   15.89    6.15
   3   3   3  235.43    8.51
   3   3   4  326.19   65.70
   3   3   5  244.85    4.70
   3   3   6  372.11    6.86
   3   3   7  541.22   10.36
   3   3   8  354.80   17.06
   3   3   9 1504.07   23.82
   3   3  10 1041.29   19.49
   3   3  11  871.51   19.25
   3   3  12  664.68   15.62
   3   3  13  341.74    9.56
   3   3  14  491.01   11.22
   3   3  15  145.44    6.77
   3   3  16  214.41    8.74
   3   3  17   10.82    2.49
   3   3  18  121.03    6.72
   3   3  19    9.45    3.26
   3   3  20   37.61    4.16
   3   3  21   36.73    5.11
   3   3  22    0.02    4.97
   3   3  23   74.96   10.52
   3   4   3 5204.62   66.40
   3   4   4  834.02   30.77
   3   4   5 3758.59   34.87
   3   4   6  719.99   17.13
   3   4   7 2806.00   25.63
   3   4   8  159.56    5.96
   3   4   9  718.86   16.64
   3   4  10   72.07    3.95
   3   4  11    4.38    1.67
   3   4  12   57.22    7.26
   3   4  13  206.71   16.60
   3   4  14    2.12    3.27
   3   4  15  530.98   13.63
   3   4  16   26.01    4.52
   3   4  17  414.99   14.34
   3   4  18   77.24    9.55
   3   4  19  228.36   10.92
   3   4  20   51.97    5.26
   3   4  21  129.44   10.80
   3   4  22   22.21    5.64
   3   4  23   22.39    6.00
   3   5   3  480.09   11.58
   3   5   4    0.12    2.06
   3   5   5  359.90   13.98
   3   5   6  259.39    7.48
   3   5   7  910.59   14.22
   3   5   8   67.71    6.48
   3   5   9 1845.91   28.36
   3   5  10   44.33    4.23
   3   5  11 1806.22   25.25
   3   5  12    6.09    2.67
   3   5  13 1221.02   35.05
   3   5  14   21.07    4.02
   3   5  15  369.96   16.97
   3   5  16   23.17    6.16
   3   5  17   67.56    5.98
   3   5  18    0.18    2.63
   3   5  19    1.49    4.19
   3   5  20    7.20    2.98
   3   5  21   21.12    4.67
   3   5  22    1.52    3.99
   3   6   3 4216.12   43.80
   3   6   4  365.32    9.85
   3   6   5 3679.43   50.98
   3   6   6  214.22   15.53
   3   6   7 1706.21   35.88
   3   6   8  218.24    7.06
   3   6   9  450.86    9.75
   3   6  10  100.07    5.11
   3   6  11    7.45    4.04
   3   6  12    0.31    2.01
   3   6  13  178.17    8.88
   3   6  14    0.63    2.47
   3   6  15  386.78   14.00
   3   6  16    3.19    2.95
   3   6  17  428.69   15.15
   3   6  18   11.97    2.82
   3   6  19  317.30   13.99
   3   6  20   23.57    4.12
   3   6  21  118.36    8.38
   3   6  22   22.00    5.78
   3   7   3  101.70    7.54
   3   7   4  124.45    8.18
   3   7   5  117.64    9.36
   3   7   6    2.22    3.25
   3   7   7  608.25   15.97
   3   7   8   32.06    2.15
   3   7   9  690.65   14.22
   3   7  10  128.53    8.27
   3   7  11  803.59   18.19
   3   7  12  181.10    8.47
   3   7  13  465.67   15.32
   3   7  14   93.24    7.08
   3   7  15  100.33   12.87
   3   7  16  169.12    8.97
   3   7  17    0.01    2.56
   3   7  18  126.91    9.71
   3   7  19   20.30    4.07
   3   7  20   37.56   14.64
   3   7  21   30.26    6.46
   3   7  22    5.64    4.03
   3   8   3  213.07   10.02
   3   8   4  428.99   16.98
   3   8   5  420.11   18.47
   3   8   6  607.00   20.52
   3   8   7  154.74    9.01
   3   8   8  339.29   11.90
   3   8   9   11.85    4.62
   3   8  10   83.76    6.36
   3   8  11  150.32    9.07
   3   8  12   77.40    6.94
   3   8  13  168.27    9.87
   3   8  14   72.50    5.90
   3   8  15  159.80    9.66
   3   8  16   20.16    3.54
   3   8  17   47.12    4.88
   3   8  18   55.53    5.94
   3   8  19   13.68    3.34
   3   8  20   35.80    4.68
   3   8  21    0.33    3.63
   3   8  22   34.53    6.24
   3   9   3   22.51    3.13
   3   9   4   22.42    3.11
   3   9   5   15.14    2.79
   3   9   6  164.11   14.57
   3   9   7    8.35    3.23
   3   9   8    7.38    1.79
   3   9   9    1.21    2.13
   3   9  10   13.45    2.29
   3   9  11   69.92    5.05
   3   9  12    1.30    2.36
   3   9  13    1.33    2.31
   3   9  14   53.49    6.06
   3   9  15   53.30    5.62
   3   9  16  114.46    8.91
   3   9  17   84.14    7.51
   3   9  18   33.91    8.80
   3   9  19   43.35    6.80
   3   9  20   16.95    4.21
   3   9  21   84.46   11.18
   3  10   3   84.06    9.72
   3  10   4  230.34   14.96
   3  10   5    7.76    3.80
   3  10   6  216.10   12.61
   3  10   7   16.56    4.26
   3  10   8   32.74    7.70
   3  10   9    6.57    3.04
   3  10  10   23.49    4.12
   3  10  11  187.50    9.31
   3  10  12    4.04    2.91
   3  10  13  140.70    7.81
   3  10  14    8.73    2.51
   3  10  15   42.46    5.26
   3  10  16    0.71    2.34
   3  10  17    3.98    2.62
   3  10  18   14.01    2.97
   3  10  19    1.80    3.02
   3  10  20    5.81    4.87
   3  10  21   39.90    7.93
   3  11   3   79.71    7.58
   3  11   4   42.05    5.70
   3  11   5   72.94    9.48
   3  11   6  414.21   20.20
   3  11   7   17.04    6.00
   3  11   8  362.39   20.72
   3  11   9   71.31    5.11
   3  11  10  316.40   18.31
   3  11  11   46.67    5.63
   3  11  12  448.31   20.93
   3  11  13   30.61    5.08
   3  11  14  260.65   13.55
   3  11  15   24.34    4.79
   3  11  16   64.15   10.56
   3  11  17  117.79    8.88
   3  11  18   19.91    4.34
   3  11  19   63.70    6.92
   3  11  20    1.48    2.55
   3  12   3  319.97   19.41
   3  12   4 1278.35   36.17
   3  12   5  195.71   12.03
   3  12   6 1225.42   38.06
   3  12   7   95.64   10.68
   3  12   8  416.35   20.21
   3  12   9   31.16    7.36
   3  12  10  288.13   12.65
   3  12  11   66.03    6.95
   3  12  12    7.48    4.77
   3  12  13  100.26   10.53
   3  12  14  162.20   10.33
   3  12  15  130.33    8.25
   3  12  16  175.21   10.59
   3  12  17   41.44    4.90
   3  12  18  197.96   11.20
   3  12  19   19.12    4.27
   3  12  20  137.47    9.79
   3  13   3   55.27    8.11
   3  13   4   22.90    4.84
   3  13   5  100.76    9.62
   3  13   6  313.54   18.10
   3  13   7  307.89   17.63
   3  13   8  376.83   19.29
   3  13   9  532.16   26.29
   3  13  10  699.03   21.32
   3  13  11  618.74   19.24
   3  13  12  702.28   26.65
   3  13  13  207.39   16.72
   3  13  14  330.16   13.90
   3  13  15  132.70    9.65
   3  13  16   98.75    8.25
   3  13  17    9.49    8.67
   3  13  18   43.62    6.41
   3  13  19    2.69    5.74
   3  14   3 1754.62   45.18
   3  14   4  757.50   27.44
   3  14   5 1046.61   35.09
   3  14   6  626.16   26.47
   3  14   7  483.60   24.31
   3  14   8  123.60   12.04
   3  14   9  398.68   20.52
   3  14  10   40.88    4.93
   3  14  11   39.94    6.03
   3  14  12    0.41    3.57
   3  14  13   44.71    8.17
   3  14  14   42.92    7.94
   3  14  15  219.83   14.80
   3  14  16   98.46    8.70
   3  14  17  157.30   11.14
   3  14  18   78.33    8.22
   3  14  19  124.76   13.38
   3  15   3   75.14    8.90
   3  15   4    1.17    3.48
   3  15   5   64.84    9.99
   3  15   6   15.45    4.32
   3  15   7  385.85   20.84
   3  15   8   35.85    9.16
   3  15   9 1140.20   39.27
   3  15  10   36.70    5.83
   3  15  11 1116.51   28.54
   3  15  12   13.40    4.45
   3  15  13  565.89   19.75
   3  15  14   18.81    6.06
   3  15  15  228.99   12.33
   3  15  16    1.49    2.75
   3  15  17   31.95    5.26
   3  15  18    9.91    3.51
   3  16   3  599.09   18.44
   3  16   4   18.34    5.81
   3  16   5  910.32   33.24
   3  16   6    0.21    4.37
   3  16   7  602.20   28.24
   3  16   8   34.80    8.60
   3  16   9  144.00   14.61
   3  16  10   16.31    4.60
   3  16  11   10.22    4.79
   3  16  12    7.01    3.48
   3  16  13   12.15    3.86
   3  16  14   32.92    7.74
   3  16  15  119.24   13.26
   3  16  16   12.02    3.11
   3  16  17  124.15   10.07
   3  17   3   29.88    4.10
   3  17   4   14.60    5.35
   3  17   5   89.03   10.10
   3  17   6   40.01    7.92
   3  17   7  174.54   16.15
   3  17   8    2.98    3.44
   3  17   9  222.23   18.32
   3  17  10   16.09    5.68
   3  17  11  237.94   23.73
   3  17  12   59.83    6.49
   3  17  13  148.21   10.82
   3  17  14   46.59    9.16
   3  17  15   10.75    6.26
   3  17  16   52.25    6.02
   3  18   3   36.50    4.61
   3  18   4    7.63    3.47
   3  18   5   87.15   11.52
   3  18   6   43.55    8.30
   3  18   7    0.39    4.99
   3  18   8   44.01    8.30
   3  18   9   16.80    3.53
   3  18  10   36.27    9.74
   3  18  11   20.31    4.59
   3  18  12    6.43    5.38
   3  18  13   27.27    5.02
   3  18  14   29.90    7.68
   3  18  15   16.83    5.51
   3  19   3   12.50    3.23
   3  19   4    4.52    2.52
   3  19   5    0.29    2.98
   3  19   6   39.92    9.06
   3  19   7    0.00    4.63
   3  19   8   39.59    7.66
   3  19   9    0.20    4.89
   3  19  10    1.85    4.16
   3  19  11    1.02    3.82
   3  19  12    1.52    2.94
   3  19  13   18.47    4.54
   3  19  14    9.96    6.10
   3  20   3   59.92    8.25
   3  20   4  273.50   12.97
   3  20   5   27.43    4.10
   3  20   6  159.10   15.44
   3  20   7   40.03    7.42
   3  20   8   70.79   11.02
   3  20   9   23.25    7.01
   3  20  10   15.59    6.36
   3  20  11   18.92    3.16
   3  20  12    2.19    5.97
   3  20  13   20.16    4.56
   3  21   3   11.78    3.66
   3  21   4    0.00    2.99
   3  21   5    4.08    2.60
   3  21   6   69.83    7.14
   3  21   7    2.96    5.26
   3  21   8  114.90   14.69
   3  21   9    5.72    5.93
   3  21  10  240.75   20.72
   3  21  11    3.08    3.39
   3  22   3   78.88   12.56
   3  22   4  730.17   35.04
   3  22   5  143.89   16.78
   3  22   6  538.56   31.50
   3  22   7   41.46    9.23
   3  22   8  227.13   18.68
   3  22   9   23.95    8.60
   3  22  10   48.03   10.13
   3  23   3   25.70    8.59
   3  23   4    7.57    5.28
   3  23   5    2.70    5.61
   3  23   6   92.28   13.09
   3  23   7   56.63   10.66
   3  24   3  356.76   26.65
   3  24   4  306.10   23.62
   4   0   4 2973.42   61.65
   4   0   6 2901.72   41.25
   4   0   8  528.13    9.92
   4   0  10  130.08    6.99
   4   0  12   93.57    4.90
   4   0  14    7.36    4.07
   4   0  16    0.40    2.72
   4   0  18   13.51    4.68
   4   0  20    0.91    4.85
   4   0  22    1.89    3.54
   4   1   4   57.91    2.63
   4   1   5   33.22    1.34
   4   1   6  115.30    3.12
   4   1   7   13.57    1.69
   4   1   8  270.93    7.45
   4   1   9  143.35    4.18
   4   1  10  229.48    8.19
   4   1  11  145.09    3.55
   4   1  12   14.41    2.57
   4   1  13    9.48    1.25
   4   1  14    8.45    1.85
   4   1  15   90.46    6.94
   4   1  16   10.07    2.52
   4   1  17   55.92    4.19
   4   1  18    0.13    2.46
   4   1  19   17.45    4.58
   4   1  20    0.29    2.87
   4   1  21   40.19    4.96
   4   1  22    0.03    2.80
   4   2   4  821.14    6.00
   4   2   5  340.66    5.53
   4   2   6  743.45   16.99
   4   2   7   33.35    2.08
   4   2   8   21.32    2.50
   4   2   9  462.24   27.29
   4   2  10  138.02    4.51
   4   2  11  835.35   11.13
   4   2  12  308.36    8.33
   4   2  13  484.24   12.28
   4   2  14  171.37    7.04
   4   2  15  129.57    5.76
   4   2  16    8.93    2.07
   4   2  17   43.36    4.31
   4   2  18   33.70    4.09
   4   2  19   34.31    3.90
   4   2  20   10.82    3.88
   4   2  21    0.48    2.57
   4   2  22   38.40    7.16
   4   3   4 1209.56   16.86
   4   3   5  969.03   11.95
   4   3   6  394.24    6.93
   4   3   7  402.23   11.76
   4   3   8  963.61   20.96
   4   3   9  150.01    6.12
   4   3  10  715.00   15.40
   4   3  11   10.81    1.79
   4   3  12   43.94    3.24
   4   3  13   22.65    3.51
   4   3  14  116.22   11.54
   4   3  15  110.57    5.61
   4   3  16  178.39   11.12
   4   3  17  210.11    8.50
   4   3  18  224.26   10.57
   4   3  19  111.57    6.97
   4   3  20  163.79   13.56
   4   3  21   62.44    9.19
   4   3  22   98.35   11.93
   4   4   4  602.00   27.07
   4   4   5   55.34    3.91
   4   4   6  132.50    4.41
   4   4   7  159.22    5.35
   4   4   8  615.34   13.70
   4   4   9  567.31   13.59
   4   4  10 1326.84   16.29
   4   4  11  136.73    5.14
   4   4  12 1246.78   24.82
   4   4  13   84.22    5.19
   4   4  14  964.86   18.10
   4   4  15  156.47    8.30
   4   4  16  483.59   17.96
   4   4  17   62.84    4.62
   4   4  18  114.33    8.52
   4   4  19   13.29    5.93
   4   4  20   12.01    5.33
   4   4  21   18.76    5.05
   4   4  22   55.87    9.74
   4   5   4 3774.61   46.21
   4   5   5   62.36    5.66
   4   5   6 4050.69   42.98
   4   5   7   15.47    4.35
   4   5   8 2321.87   25.38
   4   5   9    2.64    1.79
   4   5  10  536.51   15.86
   4   5  11   44.13    3.08
   4   5  12  128.82    4.68
   4   5  13    7.23    3.69
   4   5  14   41.83    5.66
   4   5  15   11.92    3.17
   4   5  16  287.41   11.95
   4   5  17    1.32    4.04
   4   5  18  639.01   35.57
   4   5  19    9.23    3.83
   4   5  20  547.97   26.05
   4   5  21    0.55    4.43
   4   5  22  210.05   16.89
   4   6   4  801.99   45.12
   4   6   5    0.22    3.63
   4   6   6   60.22    4.71
   4   6   7  123.57   10.55
   4   6   8  438.88   10.46
   4   6   9   88.93    4.34
   4   6  10  888.85   17.29
   4   6  11  106.68    5.26
   4   6  12 1361.80   24.11
   4   6  13   76.48    8.49
   4   6  14  826.80   33.04
   4   6  15   14.33    6.55
   4   6  16  346.45   13.97
   4   6  17   23.80    3.46
   4   6  18  112.49    9.66
   4   6  19    5.76    3.13
   4   6  20   10.05    5.50
   4   6  21    3.26    4.22
   4   6  22   29.99    6.82
   4   7   4 1360.19   29.84
   4   7   5  310.79   14.36
   4   7   6 1002.68   33.49
   4   7   7  193.83    7.27
   4   7   8  842.49   14.66
   4   7   9   25.93    3.02
   4   7  10  540.21   11.07
   4   7  11   42.56    6.05
   4   7  12  116.33    8.12
   4   7  13   56.49    5.15
   4   7  14   54.45    4.97
   4   7  15   73.97    7.57
   4   7  16   90.48    7.92
   4   7  17   68.58    8.12
   4   7  18  107.04    7.98
   4   7  19   57.84    6.47
   4   7  20  106.81   12.31
   4   7  21   30.91    6.86
   4   8   4  419.91   19.09
   4   8   5  574.19   23.04
   4   8   6  233.31   12.89
   4   8   7  333.91   14.19
   4   8   8  261.08   15.77
   4   8   9  146.22    7.49
   4   8  10   64.37    4.65
   4   8  11   75.87    6.38
   4   8  12  298.16   11.27
   4   8  13   91.36    6.43
   4   8  14   71.07    5.33
   4   8  15   10.67    1.99
   4   8  16    6.74    3.20
   4   8  17   22.75    3.51
   4   8  18    0.00    2.94
   4   8  19   29.30    4.32
   4   8  20    0.12    4.71
   4   8  21    3.25    3.67
   4   9   4   53.00    7.79
   4   9   5    7.93    3.36
   4   9   6   33.57    5.69
   4   9   7   89.28    8.76
   4   9   8   68.86    5.38
   4   9   9   17.03    8.76
   4   9  10   93.77   11.42
   4   9  11   33.32    4.66
   4   9  12   54.68    4.90
   4   9  13   18.52    5.92
   4   9  14    8.13    3.58
   4   9  15    3.83    4.49
   4   9  16   13.79    3.34
   4   9  17    0.05    3.62
   4   9  18    4.66    3.11
   4   9  19    0.06    4.92
   4   9  20    0.00    5.60
   4   9  21    7.08    4.07
   4  10   4 1494.77   38.31
   4  10   5    4.87    4.33
   4  10   6  502.55   21.78
   4  10   7   15.49    5.57
   4  10   8  211.40   12.71
   4  10   9   84.30    7.18
   4  10  10   13.09    2.62
   4  10  11  279.96   10.09
   4  10  12   67.48    6.07
   4  10  13   44.85    4.73
   4  10  14    2.36    2.46
   4  10  15   44.55    5.14
   4  10  16    2.51    2.31
   4  10  17   30.74    4.44
   4  10  18   26.89    4.07
   4  10  19    0.11    5.02
   4  10  20    0.36    5.11
   4  11   4   12.90    4.81
   4  11   5  519.61   22.49
   4  11   6   95.83    9.50
   4  11   7  393.00   20.58
   4  11   8  189.74   14.86
   4  11   9  207.25    9.01
   4  11  10  218.97    9.67
   4  11  11   34.91    4.75
   4  11  12   65.13    5.11
   4  11  13   14.31    3.15
   4  11  14   57.23    5.89
   4  11  15   42.10    5.68
   4  11  16   13.03    3.30
   4  11  17   69.19    7.39
   4  11  18    2.84    3.01
   4  11  19  121.10   13.27
   4  11  20    2.23    4.61
   4  12   4  306.31   15.39
   4  12   5  144.75   11.90
   4  12   6  149.77   12.17
   4  12   7  108.92   10.89
   4  12   8    0.02    3.61
   4  12   9  513.85   24.12
   4  12  10  168.15    9.59
   4  12  11 1074.93   31.43
   4  12  12   44.33    6.23
   4  12  13  502.39   20.71
   4  12  14  142.48    9.15
   4  12  15  282.89   13.19
   4  12  16   30.00    6.62
   4  12  17  214.73   11.59
   4  12  18   27.84    5.71
   4  12  19   25.88    7.00
   4  13   4  296.74   17.51
   4  13   5  712.14   26.63
   4  13   6  207.05   15.09
   4  13   7  228.00   15.36
   4  13   8  398.41   22.18
   4  13   9   56.66   10.02
   4  13  10  418.48   14.50
   4  13  11    5.27    2.95
   4  13  12   38.58    4.64
   4  13  13   36.82    5.29
   4  13  14   15.97    4.51
   4  13  15  132.15    9.96
   4  13  16   82.61   11.60
   4  13  17  201.71   11.49
   4  13  18  116.58    8.82
   4  13  19  189.67   16.75
   4  14   4   37.84    7.52
   4  14   5    1.55    3.55
   4  14   6    6.19    4.86
   4  14   7    2.20    4.02
   4  14   8  510.01   25.80
   4  14   9  154.78   15.15
   4  14  10  823.09   22.35
   4  14  11  222.81   10.92
   4  14  12  581.33   18.52
   4  14  13  158.27   10.32
   4  14  14  472.20   30.21
   4  14  15  167.69   11.23
   4  14  16  169.89   11.09
   4  14  17   80.36    7.77
   4  14  18   58.47    9.45
   4  15   4  794.58   32.10
   4  15   5  111.41   13.80
   4  15   6  805.09   31.83
   4  15   7   62.14   10.04
   4  15   8  795.64   33.28
   4  15   9   39.73    7.14
   4  15  10  256.64   12.75
   4  15  11   26.54    4.33
   4  15  12   15.70    4.08
   4  15  13    7.19    3.26
   4  15  14   18.27    5.14
   4  15  15    6.63    3.55
   4  15  16  186.21   11.52
   4  15  17   28.25    5.28
   4  16   4    8.69    3.87
   4  16   5   72.17    8.87
   4  16   6   18.40    5.20
   4  16   7  212.12   18.30
   4  16   8  393.19   23.39
   4  16   9   45.58    9.98
   4  16  10  451.00   25.25
   4  16  11   18.14    5.98
   4  16  12  432.75   18.00
   4  16  13    2.51    3.42
   4  16  14  252.44   17.91
   4  16  15    0.45    2.74
   4  16  16  142.04   10.84
   4  17   4  191.17    9.22
   4  17   5   37.40    7.96
   4  17   6  215.28   18.05
   4  17   7   15.76    6.45
   4  17   8  201.09   17.51
   4  17   9    5.32    4.74
   4  17  10   71.19   10.37
   4  17  11   44.12    5.82
   4  17  12   21.55    4.88
   4  17  13   23.62    6.74
   4  17  14    0.62    3.85
   4  17  15    9.98   10.79
   4  18   4  145.14    9.20
   4  18   5  348.15   23.37
   4  18   6   67.51   10.66
   4  18   7  185.55   16.67
   4  18   8   15.55    5.63
   4  18   9   49.95    7.92
   4  18  10    0.09    5.86
   4  18  11   45.31    6.61
   4  18  12   52.61    6.48
   4  18  13    9.13    2.95
   4  18  14    0.14    4.46
   4  19   4   11.00    3.03
   4  19   5   10.16    3.81
   4  19   6   23.35    7.38
   4  19   7   65.63    9.59
   4  19   8    0.06    5.12
   4  19   9   39.26    9.67
   4  19  10    9.85    5.61
   4  19  11   23.41    5.53
   4  19  12   34.96    6.48
   4  19  13    8.71    3.07
   4  20   4  260.30   19.87
   4  20   5   22.60    7.90
   4  20   6  239.04   20.24
   4  20   7    8.83    6.34
   4  20   8  108.02   13.54
   4  20   9   29.63    6.64
   4  20  10   39.98    8.57
   4  20  11   99.53    9.89
   4  20  12   33.44    6.25
   4  21   4   23.20    8.22
   4  21   5  383.90   24.71
   4  21   6    6.51    6.69
   4  21   7  301.56   25.09
   4  21   8   13.92    7.18
   4  21   9  170.41   16.99
   4  21  10   28.94    5.95
   4  22   4   98.60   12.69
   4  22   5    2.24    5.43
   4  22   6   33.57    7.54
   4  22   7   62.21   10.55
   4  22   8    1.38    4.90
   4  22   9  153.25   17.70
   4  23   4  122.04   15.38
   4  23   5  252.16   22.51
   4  23   6  101.11   14.24
   5   0   5   71.64    5.53
   5   0   7  277.00   21.36
   5   0   9  640.57   11.66
   5   0  11  838.80   12.11
   5   0  13  477.86   11.13
   5   0  15  374.87   25.48
   5   0  17  282.28   17.65
   5   0  19   55.74    9.42
   5   0  21   15.67    5.04
   5   1   5 1782.93   23.56
   5   1   6  486.63    5.36
   5   1   7 1390.22   13.75
   5   1   8  278.06   21.49
   5   1   9  802.45   21.47
   5   1  10  185.85    4.68
   5   1  11  199.31    4.82
   5   1  12  141.63    4.40
   5   1  13    0.33    1.41
   5   1  14   61.54    3.37
   5   1  15   35.57    6.26
   5   1  16    2.88    1.94
   5   1  17  127.75    7.34
   5   1  18    0.57    3.21
   5   1  19  143.34   10.06
   5   1  20    2.30    2.85
   5   1  21   65.03    6.01
   5   1  22    7.94    3.33
   5   2   6   14.37    1.09
   5   2   7  257.69    5.99
   5   2   8   54.78    2.92
   5   2   9  432.59   11.02
   5   2  10   33.24    2.92
   5   2  11  877.29   12.53
   5   2  12   20.61    2.47
   5   2  13  380.93   12.23
   5   2  14   79.30    5.31
   5   2  15  148.48    6.80
   5   2  16  227.05    8.39
   5   2  17   74.38    5.96
   5   2  18  134.66    8.53
   5   2  19    0.07    5.45
   5   2  20   79.97    7.80
   5   2  21   21.76    4.65
   5   2  22   60.47    6.47
   5   3   5 1291.47   11.78
   5   3   6  284.07    7.93
   5   3   7  205.64    6.88
   5   3   8  151.24    3.85
   5   3   9    3.62    1.85
   5   3  10  447.04   11.50
   5   3  11  109.93    3.99
   5   3  12  236.77    6.07
   5   3  13  206.34   10.91
   5   3  14   78.65    5.68
   5   3  15  167.60    7.60
   5   3  16   35.53    4.73
   5   3  17  181.85   11.85
   5   3  18   37.02    5.15
   5   3  19  129.60    9.16
   5   3  20    8.77    3.14
   5   3  21   25.10    6.90
   5   4   5  182.46    7.46
   5   4   6   18.30    1.63
   5   4   7  960.45   15.09
   5   4   8   58.04    3.84
   5   4   9  635.78   11.94
   5   4  10    6.65    1.14
   5   4  11  426.49    9.82
   5   4  12   48.40    5.02
   5   4  13   33.24    3.45
   5   4  14   65.18    4.61
   5   4  15    1.79    2.37
   5   4  16  108.64    9.95
   5   4  17  116.41    6.59
   5   4  18   75.91    6.55
   5   4  19  255.75   18.24
   5   4  20   80.33   10.20
   5   4  21  191.80   15.90
   5   5   5   72.26    5.47
   5   5   6    9.44    1.74
   5   5   7   40.41    2.44
   5   5   8    1.10    1.18
   5   5   9  158.95    5.76
   5   5  10    0.69    1.35
   5   5  11  427.21   10.14
   5   5  12    0.36    1.33
   5   5  13  582.02   15.80
   5   5  14   10.01    3.53
   5   5  15  526.19   23.65
   5   5  16    1.30    2.33
   5   5  17  325.13   13.79
   5   5  18    9.60    5.18
   5   5  19  139.06   13.62
   5   5  20    3.28    4.98
   5   5  21   16.08    6.36
   5   6   5  340.44   14.80
   5   6   6   22.73    6.53
   5   6   7  474.46   13.62
   5   6   8   10.00    1.42
   5   6   9  352.51    7.91
   5   6  10   74.05    5.01
   5   6  11  481.91   19.65
   5   6  12   41.52    3.44
   5   6  13   27.30   13.86
   5   6  14  138.37    8.28
   5   6  15   26.15    4.29
   5   6  16   68.43    5.54
   5   6  17   91.80    7.55
   5   6  18   44.51    8.52
   5   6  19  184.93   15.10
   5   6  20   14.73    5.29
   5   6  21  171.95   15.05
   5   7   5  288.45   15.36
   5   7   6 1441.79   36.88
   5   7   7  175.41    6.97
   5   7   8  620.45   20.64
   5   7   9  106.60    4.06
   5   7  10  299.27    7.27
   5   7  11   35.79    5.12
   5   7  12  326.38   12.84
   5   7  13  199.99   10.40
   5   7  14  112.79    6.82
   5   7  15  137.61   13.02
   5   7  16    7.78    7.05
   5   7  17  122.95    8.43
   5   7  18    8.38    4.54
   5   7  19   54.02    8.46
   5   7  20    0.08    6.19
   5   7  21    5.25    4.28
   5   8   5    0.22    2.73
   5   8   6   77.26    8.15
   5   8   7   95.76    9.32
   5   8   8   17.27    3.08
   5   8   9  296.91   10.26
   5   8  10  148.55    6.51
   5   8  11  525.60   21.60
   5   8  12  173.24   13.41
   5   8  13  231.97   13.66
   5   8  14  319.72   13.68
   5   8  15  174.76   18.97
   5   8  16  133.21    8.57
   5   8  17   40.02    4.97
   5   8  18   36.02    6.30
   5   8  19    9.89    3.90
   5   8  20   10.11    4.81
   5   9   5 2023.67   46.82
   5   9   6  534.51   24.42
   5   9   7 1780.25   46.34
   5   9   8  387.04   30.21
   5   9   9  598.80   23.06
   5   9  10  136.55    7.03
   5   9  11  118.83    5.53
   5   9  12   49.08    4.22
   5   9  13   10.36    3.08
   5   9  14    7.54    3.23
   5   9  15    3.67    2.64
   5   9  16   53.16    5.55
   5   9  17   73.27   10.36
   5   9  18    7.14    4.40
   5   9  19  120.63   12.45
   5   9  20   12.13    5.42
   5  10   5  142.20   11.14
   5  10   6   57.41    6.81
   5  10   7    5.56    3.91
   5  10   8  122.20   11.74
   5  10   9  293.84   11.55
   5  10  10  257.47   11.95
   5  10  11  426.79   11.74
   5  10  12   97.92    7.26
   5  10  13  183.63    9.37
   5  10  14   39.60   13.75
   5  10  15  203.20   10.86
   5  10  16    3.34    2.92
   5  10  17  207.39   16.25
   5  10  18   19.88    5.20
   5  10  19   30.82    7.05
   5  11   5 1006.44   33.40
   5  11   6   24.69    5.40
   5  11   7  885.89   30.72
   5  11   8   99.37   11.89
   5  11   9  469.71   15.72
   5  11  10  370.84   13.30
   5  11  11  255.15   10.29
   5  11  12  160.79    7.64
   5  11  13   16.44    5.39
   5  11  14   93.08   12.60
   5  11  15    2.08    4.23
   5  11  16   77.50    8.09
   5  11  17   51.17    7.88
   5  11  18   10.07    4.80
   5  11  19   77.63   11.38
   5  12   5   26.63    5.13
   5  12   6   18.69    5.66
   5  12   7   71.98    7.55
   5  12   8   32.98    7.51
   5  12   9  315.34   14.30
   5  12  10    4.98    3.55
   5  12  11  352.49   17.14
   5  12  12    5.31    2.92
   5  12  13  233.89   11.26
   5  12  14   10.05    3.33
   5  12  15   69.77    7.77
   5  12  16   22.45    4.29
   5  12  17    6.21    4.80
   5  12  18  153.43   14.19
   5  13   5  455.11   23.21
   5  13   6    0.83    4.65
   5  13   7   26.25    5.25
   5  13   8   25.28    4.47
   5  13   9   64.69    9.93
   5  13  10  303.54   12.74
   5  13  11   25.54    3.82
   5  13  12  212.94   12.87
   5  13  13   84.58    5.60
   5  13  14  145.45    9.13
   5  13  15  199.63   11.42
   5  13  16  116.73    8.90
   5  13  17  109.05   13.25
   5  13  18   31.67    7.90
   5  14   5  111.98   11.93
   5  14   6    8.28    4.90
   5  14   7  417.71   23.74
   5  14   8  109.28   12.54
   5  14   9  209.65   16.57
   5  14  10   65.24    6.20
   5  14  11   93.52   12.08
   5  14  12    9.81    3.59
   5  14  13   26.50    4.38
   5  14  14    7.82    6.43
   5  14  15    8.36    4.35
   5  14  16   14.50    4.29
   5  14  17   93.26   11.89
   5  15   5    2.78    4.87
   5  15   6   95.23    9.78
   5  15   7   73.78    9.88
   5  15   8   31.20    6.80
   5  15   9  113.80   11.85
   5  15  10    0.88    2.62
   5  15  11  144.10   10.31
   5  15  12    4.21    4.37
   5  15  13  132.14    9.85
   5  15  14   56.11    6.41
   5  15  15  177.11   16.91
   5  15  16   49.83    9.12
   5  16   5   62.08    8.76
   5  16   6   56.63    9.48
   5  16   7  303.08   19.03
   5  16   8   49.61    9.77
   5  16   9  170.83   16.72
   5  16  10  101.48    9.34
   5  16  11   62.94    6.52
   5  16  12  195.08   11.24
   5  16  13    7.76    3.62
   5  16  14  123.19    9.80
   5  16  15    9.81    4.80
   5  16  16   61.83   10.63
   5  17   5   93.41   12.31
   5  17   6  822.23   34.48
   5  17   7   39.58    8.88
   5  17   8  414.15   25.38
   5  17   9   15.76    4.63
   5  17  10  182.64   17.33
   5  17  11   25.70   11.34
   5  17  12   95.88    9.69
   5  17  13   33.38    6.02
   5  17  14   24.93    5.28
   5  17  15   24.14    5.01
   5  18   5   64.12    9.22
   5  18   6   52.40    8.13
   5  18   7   23.50    7.78
   5  18   8   38.27    8.01
   5  18   9   70.99   10.79
   5  18  10  126.79   13.51
   5  18  11  141.33   10.80
   5  18  12  139.69   10.67
   5  18  13   75.85    9.19
   5  18  14  137.88   11.52
   5  19   5  548.36   28.82
   5  19   6  355.33   24.41
   5  19   7  543.56   31.78
   5  19   8  221.14   19.18
   5  19   9  354.19   25.78
   5  19  10   47.14    9.42
   5  19  11   80.63   14.47
   5  19  12    2.81    5.82
   5  20   5  140.06   15.03
   5  20   6   23.29    6.78
   5  20   7    2.31    4.01
   5  20   8   63.40   11.75
   5  20   9   37.15   10.06
   5  20  10  104.55   14.56
   5  20  11  128.75   10.20
   5  21   5  235.57   21.27
   5  21   6    5.60    5.94
   5  21   7  242.14   20.54
   5  21   8   18.76    7.20
   5  21   9   93.83   14.64
   5  22   5    0.51    5.91
   5  22   6  116.42   14.49
   5  22   7   12.70    6.49
   5  23   5    2.38    4.64
   6   0   6 2596.47   52.65
   6   0  10 1375.36   39.79
   6   0  12  755.37   18.90
   6   0  14   31.90    6.98
   6   0  16   67.38   10.31
   6   0  18  261.55   17.08
   6   0  20  218.66   18.02
   6   1   6   85.78    4.72
   6   1   7   65.78    6.20
   6   1   8   20.75    2.55
   6   1   9   66.96    3.13
   6   1  10  469.25    9.31
   6   1  11   10.58    1.53
   6   1  12  653.04   10.94
   6   1  13   35.93    2.71
   6   1  14  672.06   28.94
   6   1  15   75.91    5.58
   6   1  16  674.29   19.95
   6   1  17   44.12    6.87
   6   1  18  210.98   11.41
   6   1  19   25.18    4.07
   6   1  20  104.90    8.90
   6   1  21   18.70    4.93
   6   2   6  943.04   19.98
   6   2   7  384.48   10.48
   6   2   8  896.01   33.51
   6   2   9  581.79    9.06
   6   2  10  622.04    9.38
   6   2  11  421.24    8.75
   6   2  12  189.51    7.09
   6   2  13  182.25    5.61
   6   2  14    0.26    1.99
   6   2  15    9.09    4.28
   6   2  16   13.45    3.31
   6   2  17    0.91    3.03
   6   2  18   93.74    8.70
   6   2  19    6.86    3.11
   6   2  20  164.74   10.66
   6   2  21   31.37    5.63
   6   3   6  191.84    4.07
   6   3   7   15.97    2.53
   6   3   8    3.03    1.36
   6   3   9   63.87    2.85
   6   3  10  135.16    4.19
   6   3  11   44.72    2.73
   6   3  12  153.05    5.43
   6   3  13  131.88    9.93
   6   3  14  188.65    7.65
   6   3  15  164.83    7.51
   6   3  16  136.14    8.26
   6   3  17  133.11    8.98
   6   3  18    4.14    3.74
   6   3  19  106.27    9.17
   6   3  20    0.03    2.79
   6   3  21   43.31    5.72
   6   4   6   10.91    1.32
   6   4   7   70.54    3.34
   6   4   8    6.49    0.96
   6   4   9  162.72    4.99
   6   4  10    2.87    1.43
   6   4  11   34.32    2.86
   6   4  12    0.05    1.44
   6   4  13    4.63    1.60
   6   4  14    0.35    1.98
   6   4  15    8.68    4.67
   6   4  16   20.96    7.63
   6   4  17   14.60    4.15
   6   4  18   49.93    5.52
   6   4  19    5.33    4.63
   6   4  20   62.84   10.00
   6   4  21    2.14    3.82
   6   5   6   44.99    3.64
   6   5   7    1.47    1.72
   6   5   8   16.08    1.97
   6   5   9   13.71    1.67
   6   5  10   15.31    2.21
   6   5  11   11.60    2.02
   6   5  12   24.83    2.96
   6   5  13    0.02    1.97
   6   5  14    0.01    2.74
   6   5  15    1.29    2.33
   6   5  16    9.29    3.58
   6   5  17    3.53    4.50
   6   5  18   55.89    9.79
   6   5  19    0.34    3.62
   6   5  20   51.67    9.33
   6   6   6   61.13    7.61
   6   6   7  534.36   11.83
   6   6   8    0.16    1.59
   6   6   9  231.13    7.45
   6   6  10   15.94    2.40
   6   6  11   85.04    4.18
   6   6  12   11.68    2.30
   6   6  13   67.25    8.41
   6   6  14   17.17    3.88
   6   6  15    0.19    3.02
   6   6  16  113.30   11.17
   6   6  17    1.59    5.25
   6   6  18   65.06   10.25
   6   6  19    0.08    5.35
   6   6  20   39.62    7.68
   6   7   6  103.59    7.87
   6   7   7   32.55    5.30
   6   7   8   27.13    4.41
   6   7   9  277.45    7.16
   6   7  10   61.29    2.91
   6   7  11  347.97   11.46
   6   7  12  145.25   13.22
   6   7  13  488.13   27.65
   6   7  14  300.98   12.44
   6   7  15  367.66   13.57
   6   7  16  133.98   11.97
   6   7  17  176.68   15.66
   6   7  18    7.77    4.85
   6   7  19   62.54    9.57
   6   7  20    7.73    6.06
   6   8   6  746.80   27.35
   6   8   7  894.81   30.03
   6   8   8  873.24   19.70
   6   8   9  480.66   10.83
   6   8  10  456.87   17.45
   6   8  11  351.57   10.89
   6   8  12   93.83    9.45
   6   8  13  298.43   12.95
   6   8  14  101.07    7.26
   6   8  15    0.33    5.38
   6   8  16   20.90    7.35
   6   8  17    7.00    4.17
   6   8  18  103.82   12.46
   6   8  19   43.28    8.38
   6   8  20  127.79   13.81
   6   9   6  203.69   15.33
   6   9   7    6.05    4.91
   6   9   8   16.49    4.07
   6   9   9    7.46    3.28
   6   9  10  309.64   17.71
   6   9  11  100.20    5.54
   6   9  12  379.64   14.31
   6   9  13  259.14   17.33
   6   9  14  596.23   17.32
   6   9  15  184.80   15.72
   6   9  16  469.16   26.51
   6   9  17   70.82    9.63
   6   9  18  209.27   18.04
   6   9  19   14.45    4.56
   6  10   6 2063.96   51.54
   6  10   7   32.30    8.73
   6  10   8 1587.48   43.34
   6  10   9  117.64   11.93
   6  10  10  868.27   17.54
   6  10  11   37.27    3.61
   6  10  12  218.98   11.65
   6  10  13   36.83    4.21
   6  10  14   54.94    5.63
   6  10  15    0.11    5.29
   6  10  16   20.82    6.67
   6  10  17   10.83    6.70
   6  10  18  142.29   14.36
   6  10  19   11.45    5.86
   6  11   6   74.65    8.43
   6  11   7   86.60    8.32
   6  11   8   14.75    4.84
   6  11   9    7.82    3.71
   6  11  10  333.74   10.77
   6  11  11   30.56    3.13
   6  11  12  376.50   12.62
   6  11  13    4.00    3.05
   6  11  14  372.30   14.90
   6  11  15   10.29    6.16
   6  11  16  303.34   20.13
   6  11  17   20.37    7.12
   6  11  18  154.53   15.67
   6  12   6  311.34   19.07
   6  12   7    1.01    5.20
   6  12   8   90.76   12.02
   6  12   9   43.46    5.81
   6  12  10  173.70    9.26
   6  12  11  124.11    6.66
   6  12  12  128.44    6.63
   6  12  13   40.30    8.48
   6  12  14    1.16    2.70
   6  12  15    0.00    5.13
   6  12  16    8.44    4.90
   6  12  17    1.67    4.48
   6  12  18   34.87    6.82
   6  13   6   53.86    8.16
   6  13   7    1.34    4.04
   6  13   8   20.52    7.24
   6  13   9    0.59    4.00
   6  13  10   12.35    3.56
   6  13  11    1.12    2.54
   6  13  12   60.09    4.68
   6  13  13   23.55    4.07
   6  13  14   91.28    7.88
   6  13  15   16.07    5.23
   6  13  16   16.11    5.33
   6  13  17   48.47    8.68
   6  14   6    0.99    5.20
   6  14   7   28.09    5.36
   6  14   8   10.72    5.99
   6  14   9    0.08    4.20
   6  14  10    5.41    2.54
   6  14  11    5.99    2.91
   6  14  12    9.17    2.39
   6  14  13    0.01    2.15
   6  14  14    3.81    2.73
   6  14  15    5.18    5.11
   6  14  16   13.24    4.62
   6  15   6    0.09    5.07
   6  15   7    1.13    4.72
   6  15   8    8.48    3.79
   6  15   9    6.77    4.53
   6  15  10    1.92    2.43
   6  15  11   46.72    6.00
   6  15  12    4.86    3.31
   6  15  13   61.06    5.55
   6  15  14    0.26    4.45
   6  15  15   54.86   10.57
   6  15  16    9.05    5.15
   6  16   6    0.11    4.56
   6  16   7  538.29   28.81
   6  16   8    3.08    5.89
   6  16   9  169.42   17.68
   6  16  10    5.77    3.17
   6  16  11  211.89   11.89
   6  16  12    8.46    3.46
   6  16  13   64.49    5.69
   6  16  14    0.11    3.82
   6  16  15    1.72    5.42
   6  17   6   41.78    7.30
   6  17   7    0.92    4.47
   6  17   8    0.00    4.42
   6  17   9  123.88   15.14
   6  17  10   27.65    4.46
   6  17  11  272.90   14.65
   6  17  12   44.37    6.06
   6  17  13  259.40   13.89
   6  17  14   39.87    7.05
   6  18   6  336.85   22.38
   6  18   7  817.15   36.51
   6  18   8  423.48   26.49
   6  18   9  431.36   26.99
   6  18  10  170.76   18.13
   6  18  11  191.08   12.60
   6  18  12   71.66    7.77
   6  18  13  108.07   15.07
   6  19   6   52.82   10.93
   6  19   7    1.77    5.31
   6  19   8    0.01    5.60
   6  19   9   17.81    6.39
   6  19  10   83.44   13.41
   6  19  11   82.72    8.87
   6  20   6  714.41   34.22
   6  20   7   55.44   11.31
   6  20   8  490.92   29.12
   6  20   9   42.27   10.97
   6  20  10  205.68   20.06
   6  21   6   15.67    6.28
   6  21   7   24.70    8.30
   6  21   8    2.85    4.10
   6  22   6   59.84   11.18
   7   0   9    9.46    6.65
   7   0  11  157.08   13.72
   7   0  13  358.90   20.03
   7   0  15  528.43   24.67
   7   0  17  555.33   25.78
   7   0  19  474.92   25.62
   7   1   8  129.92    8.41
   7   1   9  674.42   16.81
   7   1  10   95.20    6.35
   7   1  11  997.45   28.75
   7   1  12   46.31    5.21
   7   1  13  360.65   13.24
   7   1  14    5.73    3.10
   7   1  15   38.56    6.16
   7   1  16   14.00    8.73
   7   1  17   44.54    6.89
   7   1  18    6.85    3.66
   7   1  19   98.67    9.52
   7   1  20   22.94    5.32
   7   2   7  366.51   13.19
   7   2   8   66.30    4.59
   7   2   9   44.38    2.08
   7   2  10  163.86    4.45
   7   2  11    1.21    1.31
   7   2  12  151.81    6.61
   7   2  13   81.29    6.62
   7   2  14   94.86    9.39
   7   2  15  245.28   15.59
   7   2  16   68.11    5.82
   7   2  17  203.90   11.49
   7   2  18   44.97    7.38
   7   2  19  156.89   17.51
   7   2  20   29.78    5.25
   7   3   7   22.76    1.31
   7   3   8  326.12    7.42
   7   3   9   22.06    3.32
   7   3  10   70.57    5.96
   7   3  11  177.31    5.60
   7   3  12   51.69    5.26
   7   3  13  254.03   12.23
   7   3  14   11.04    6.33
   7   3  15   73.31    6.59
   7   3  16   25.93    4.96
   7   3  17    8.25    3.42
   7   3  18   11.87    7.08
   7   3  19    1.14    3.19
   7   3  20   33.33    5.20
   7   4   7  780.82    7.89
   7   4   8   38.73    2.01
   7   4   9  511.90    8.38
   7   4  10   17.60    3.39
   7   4  11  367.97    7.70
   7   4  12   21.65    5.34
   7   4  13   59.31    6.17
   7   4  14   91.58    7.27
   7   4  15    0.67    5.35
   7   4  16   61.29    6.21
   7   4  17    0.20    3.48
   7   4  18    0.61    3.70
   7   4  19    0.02    4.03
   7   4  20    0.43    4.04
   7   5   7   94.01    4.48
   7   5   8   35.82    2.87
   7   5   9    0.19    1.17
   7   5  10   91.17    5.80
   7   5  11   71.55    4.10
   7   5  12   36.15    3.70
   7   5  13  398.31   15.36
   7   5  14    8.09    9.30
   7   5  15   85.50    7.50
   7   5  16    4.06    3.63
   7   5  17   27.19    6.15
   7   5  18    0.01    4.94
   7   5  19    0.49    3.93
   7   5  20    0.64    5.47
   7   6   7  866.31   10.62
   7   6   8  140.37    4.23
   7   6   9  680.40    9.72
   7   6  10  118.07    4.64
   7   6  11  432.94   17.52
   7   6  12  197.76   20.41
   7   6  13   66.14    9.76
   7   6  14  212.53   15.04
   7   6  15    6.30    4.86
   7   6  16  124.63   14.60
   7   6  17    8.81    3.79
   7   6  18   58.13    8.55
   7   6  19    0.50    3.97
   7   7   7    0.37    1.20
   7   7   8  399.95    8.04
   7   7   9   18.96    1.90
   7   7  10  351.89    8.37
   7   7  11  104.39    6.76
   7   7  12  400.89   13.56
   7   7  13  570.52   27.40
   7   7  14   25.04    7.00
   7   7  15   82.21   10.33
   7   7  16    2.53    4.30
   7   7  17   12.34    6.16
   7   7  18   10.24    4.36
   7   7  19    9.60    6.13
   7   8   7   23.20    4.91
   7   8   8   71.25    3.75
   7   8   9    5.09    1.71
   7   8  10  168.53    8.94
   7   8  11   11.88    2.68
   7   8  12  242.73   10.49
   7   8  13  143.16   13.65
   7   8  14  202.15   16.50
   7   8  15  298.38   19.60
   7   8  16  172.25   14.72
   7   8  17  228.24   18.07
   7   8  18  120.39   13.91
   7   8  19  126.03   14.31
   7   9   7  780.76   30.15
   7   9   8  304.76    9.69
   7   9   9  790.50   28.55
   7   9  10  123.85    7.06
   7   9  11  463.77   12.15
   7   9  12   92.56    6.62
   7   9  13  404.61   22.33
   7   9  14   26.59    7.70
   7   9  15   23.76    7.02
   7   9  16    2.96    4.76
   7   9  17    4.01    5.33
   7   9  18    7.31    4.92
   7  10   7  157.55   14.07
   7  10   8  174.58    8.54
   7  10   9   21.60    3.13
   7  10  10    0.81    2.24
   7  10  11  374.37   10.97
   7  10  12    7.43    2.36
   7  10  13  366.11   22.90
   7  10  14    3.74    4.89
   7  10  15  381.35   22.31
   7  10  16   11.79    6.92
   7  10  17  348.13   22.48
   7  10  18    9.49    6.73
   7  11   7  373.51   21.07
   7  11   8    2.50    4.36
   7  11   9  502.39   13.39
   7  11  10    0.05    2.67
   7  11  11  449.80   13.39
   7  11  12   31.90    3.99
   7  11  13  228.84   18.57
   7  11  14   33.80    7.45
   7  11  15   20.97    7.27
   7  11  16    9.63    5.52
   7  11  17    7.61    6.20
   7  12   7  145.60   14.12
   7  12   8  300.51   19.84
   7  12   9   35.99    9.65
   7  12  10   90.22    5.96
   7  12  11    2.81    3.01
   7  12  12   53.93    5.11
   7  12  13   93.00   11.82
   7  12  14   75.26   10.04
   7  12  15  111.59   13.16
   7  12  16   12.04    6.20
   7  12  17   85.61   12.58
   7  13   7   71.87    9.19
   7  13   8    4.22    4.91
   7  13   9    0.20    2.78
   7  13  10    5.27    3.08
   7  13  11  122.10    7.50
   7  13  12    0.79    2.07
   7  13  13  159.26   11.35
   7  13  14   12.81    5.44
   7  13  15   48.20    8.44
   7  13  16    6.60    4.62
   7  14   7  296.60   18.38
   7  14   8  136.43   14.23
   7  14   9  201.09   17.44
   7  14  10   46.04    5.95
   7  14  11  183.71    9.34
   7  14  12   24.13    7.68
   7  14  13   50.39    6.79
   7  14  14    9.68    5.70
   7  14  15    4.20    4.97
   7  15   7  109.08   13.13
   7  15   8   41.41    7.66
   7  15   9    1.02    3.68
   7  15  10  149.17   11.02
   7  15  11   35.41    5.37
   7  15  12  133.27   10.66
   7  15  13   78.93    7.73
   7  15  14   19.21    7.27
   7  15  15   92.25   12.26
   7  16   7  304.01   22.44
   7  16   8    1.16    5.08
   7  16   9  167.27   16.67
   7  16  10   18.13    4.52
   7  16  11  128.48    9.05
   7  16  12   67.24    8.41
   7  16  13   29.52    5.47
   7  16  14  126.62   13.52
   7  17   7    2.88    5.83
   7  17   8  323.91   22.89
   7  17   9   64.67    9.49
   7  17  10  321.35   15.73
   7  17  11  134.92   10.02
   7  17  12  200.20   19.31
   7  17  13   97.31    9.65
   7  18   7   34.36    6.59
   7  18   8    7.30    4.59
   7  18   9    0.31    4.52
   7  18  10   65.55    6.43
   7  18  11   28.43    8.54
   7  18  12  157.32   18.01
   7  19   7  229.34   20.47
   7  19   8  188.33   18.11
   7  19   9  192.47   19.49
   7  19  10  133.22   10.02
   7  20   7    7.81    5.86
   7  20   8   71.00   12.73
   7  20   9   11.99    6.36
   7  21   7  114.57   15.56
   8   0   8   18.85    6.59
   8   0  10  157.37   11.96
   8   0  12  288.26   20.13
   8   0  14   98.62   10.01
   8   0  16   19.06    5.57
   8   0  18    2.80    5.88
   8   1   8   30.80    6.44
   8   1   9  140.75    8.20
   8   1  10   34.06    9.20
   8   1  11   54.13    6.17
   8   1  12    4.47    2.94
   8   1  13  131.94    7.96
   8   1  14   21.39    4.85
   8   1  15   39.96    5.37
   8   1  16  213.66   17.56
   8   1  17   12.07    4.77
   8   1  18  250.14   13.00
   8   1  19    7.72    3.76
   8   2   8    0.40    1.99
   8   2   9   68.74    5.64
   8   2  10   64.46    6.42
   8   2  11   10.31    8.91
   8   2  12  135.54    8.31
   8   2  13   26.06    4.59
   8   2  14  123.06    8.75
   8   2  15   71.38    9.56
   8   2  16   86.35    8.28
   8   2  17   75.87    9.04
   8   2  18    6.35    3.29
   8   2  19   66.56    6.77
   8   3   8  371.04   14.91
   8   3   9  877.44   42.85
   8   3  10  731.72   29.32
   8   3  11  310.07   15.22
   8   3  12  409.66   15.06
   8   3  13  278.49   12.49
   8   3  14   38.77    5.55
   8   3  15   91.80   14.60
   8   3  16    4.80    2.84
   8   3  17   54.45    6.60
   8   3  18    8.39    2.89
   8   3  19    1.66    3.21
   8   4   8  203.20    6.41
   8   4   9    5.49    4.21
   8   4  10   11.32    1.09
   8   4  11   38.30    6.72
   8   4  12  389.75   14.94
   8   4  13   55.51    6.00
   8   4  14  248.13   16.93
   8   4  15   35.39    5.41
   8   4  16  239.01   12.55
   8   4  17   51.25    6.15
   8   4  18  206.20   12.27
   8   4  19   25.04    4.70
   8   5   8 1108.51   22.05
   8   5   9   67.47    3.30
   8   5  10 2278.11   43.25
   8   5  11   13.66    5.88
   8   5  12 1206.19   27.34
   8   5  13    2.68    2.61
   8   5  14  165.92   15.59
   8   5  15    1.03    3.06
   8   5  16   33.89    5.46
   8   5  17    5.89    5.47
   8   5  18    5.52    4.92
   8   5  19    7.12    5.49
   8   6   8  266.11    6.87
   8   6   9   89.28    3.97
   8   6  10   14.38    2.76
   8   6  11   83.75    7.23
   8   6  12  243.73   11.89
   8   6  13   21.84    6.98
   8   6  14  429.48   24.07
   8   6  15    0.02    3.90
   8   6  16  357.27   21.89
   8   6  17    0.02    5.95
   8   6  18  129.73   14.04
   8   7   8  245.30    6.09
   8   7   9  199.18    7.54
   8   7  10  565.93   13.36
   8   7  11  164.34   14.69
   8   7  12  520.16   25.33
   8   7  13   97.27   12.10
   8   7  14   53.80    8.62
   8   7  15   81.69   11.30
   8   7  16    0.06    4.23
   8   7  17   73.67   10.43
   8   7  18   20.14    5.89
   8   8   8   17.66    2.41
   8   8   9   90.71    4.77
   8   8  10   81.61    6.46
   8   8  11   16.79    6.02
   8   8  12  193.47   16.26
   8   8  13    0.55    4.00
   8   8  14  109.98   13.12
   8   8  15    8.10    5.01
   8   8  16   74.30   10.97
   8   8  17   14.95    6.07
   8   8  18    9.47    4.64
   8   9   8   16.09    4.34
   8   9   9   10.63    2.63
   8   9  10    0.54    1.90
   8   9  11   64.43    6.89
   8   9  12   10.63    3.70
   8   9  13   28.73    6.30
   8   9  14   53.56    9.16
   8   9  15   14.79    6.06
   8   9  16   87.75   12.42
   8   9  17   39.78    8.77
   8  10   8   29.03    4.69
   8  10   9    1.65    2.50
   8  10  10  168.66    7.88
   8  10  11    3.65    3.60
   8  10  12  186.64   16.45
   8  10  13   43.01    8.00
   8  10  14   48.48    9.40
   8  10  15   39.19    8.01
   8  10  16    2.72    4.10
   8  10  17    5.39    4.14
   8  11   8   94.67    7.20
   8  11   9  301.58   10.31
   8  11  10   10.80    4.76
   8  11  11  149.19   13.96
   8  11  12    4.23    6.47
   8  11  13   87.14   12.11
   8  11  14   45.13    9.71
   8  11  15   30.11    7.01
   8  11  16   89.98   11.53
   8  12   8    9.72    4.97
   8  12   9   44.47    4.36
   8  12  10   28.48    3.81
   8  12  11    2.79    7.82
   8  12  12  147.97   10.22
   8  12  13   35.51    8.63
   8  12  14   91.63   11.08
   8  12  15   96.35   12.00
   8  12  16   46.80   10.25
   8  13   8  193.25   16.81
   8  13   9  559.45   17.72
   8  13  10  286.71   15.11
   8  13  11  277.95   14.25
   8  13  12  236.02   13.98
   8  13  13  181.00   12.18
   8  13  14   84.93   13.46
   8  13  15   40.23    9.54
   8  14   8  152.00   16.61
   8  14   9    1.53    7.96
   8  14  10    1.85    3.48
   8  14  11   27.37    5.34
   8  14  12   60.81    7.93
   8  14  13   41.98    6.61
   8  14  14  169.88   16.70
[truncated: 1,588,370 more chars]
